# Supplementary material for: [3+3]-Annulation of Cyclic Nitronates with Vinyl Diazoacetates: Diastereoselective Synthesis of Partially Saturated [1,2]Oxazino[2,3-b][1,2]oxazines and Their Base-Promoted Ring Contraction to Pyrrolo[1,2-b][1,2]oxazine Derivatives
Source: MDPI journal article supplement (doi:10.3390/molecules28073025), 2023-03-28

## Supplementary materials

### [3+3]-Annulation of Cyclic Nitronates with Vinyl Diazoacetates: Diastereoselective Synthesis of Partially Saturated [1,2]Oxazino[2,3-*b*][1,2]oxazines and Their Base-Promoted Ring Contraction to Pyrrolo[1,2-*b*][1,2]oxazine Derivatives

#### List of starting nitronates **1** and vinyl diazoacetates **2**

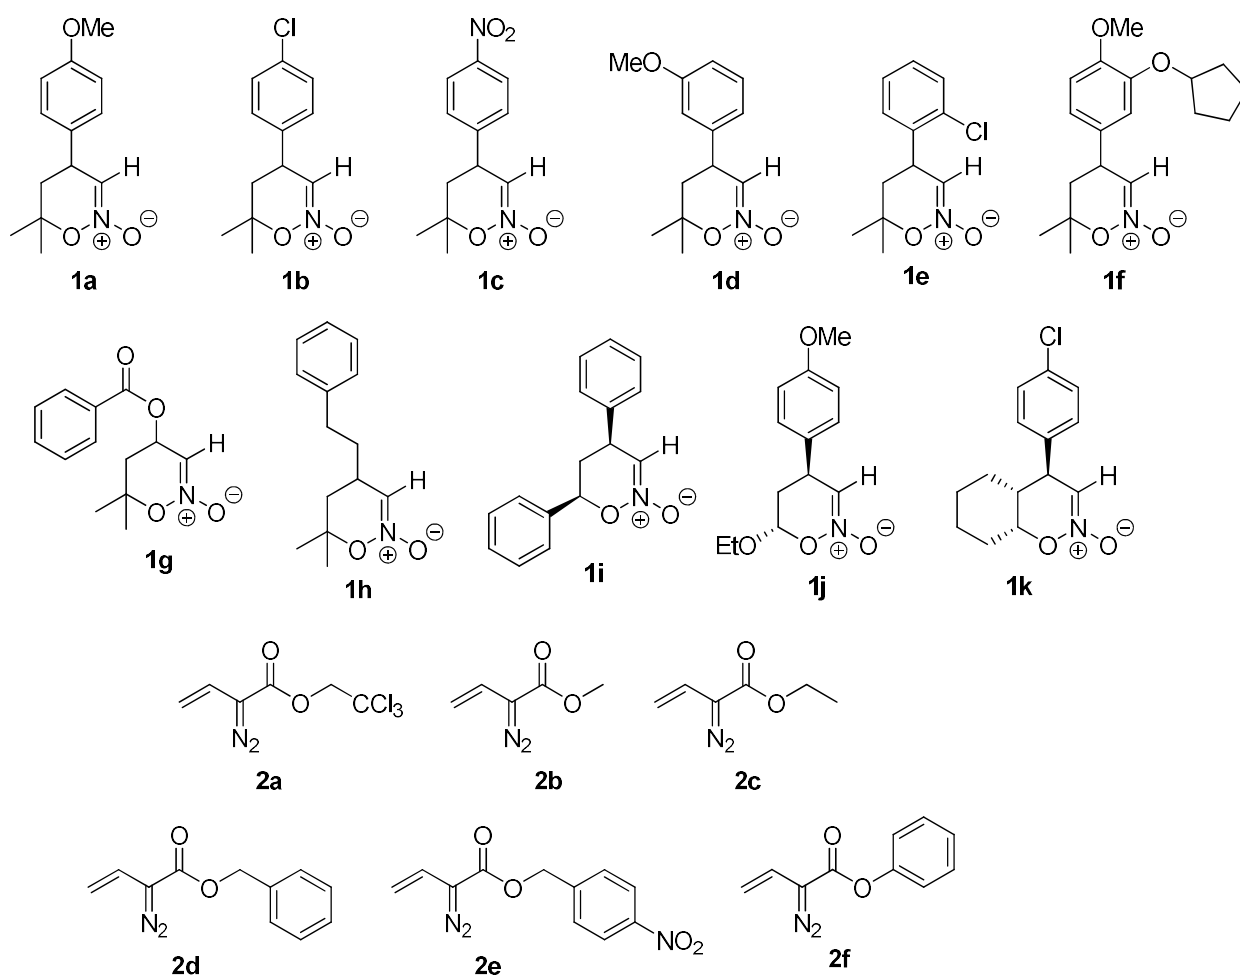

Starting nitronates **1a,b,g-j** were prepared according to the literature procedures:

**1a** [s1], **1b** [s2], **1g** [s3], **1h** [s4], **1i** [s4], **1j** [s3].

Starting vinyl diazoacetates **2b-d** were prepared according to the literature procedures:

**2b** [s5], **2c** [s6], **2d** [s6].

**X-ray crystallography****Table S1.** Crystal data and structure refinement parameters for **3b**, **3p**, and **4b**

|                                                                        | <b>3b</b>                                       | <b>3p</b>                                                       | <b>4b</b>                                       |
|------------------------------------------------------------------------|-------------------------------------------------|-----------------------------------------------------------------|-------------------------------------------------|
| Empirical formula                                                      | C <sub>18</sub> H <sub>23</sub> NO <sub>5</sub> | C <sub>20</sub> H <sub>21</sub> Cl <sub>4</sub> NO <sub>4</sub> | C <sub>18</sub> H <sub>21</sub> NO <sub>4</sub> |
| Formula weight                                                         | 333.37                                          | 481.18                                                          | 315.36                                          |
| T, K                                                                   | 100                                             | 100                                                             | 100                                             |
| Crystal system                                                         | Triclinic                                       | Monoclinic                                                      | Orthorhombic                                    |
| Space group                                                            | P-1                                             | P2 <sub>1</sub> /c                                              | P2 <sub>1</sub> 2 <sub>1</sub> 2 <sub>1</sub>   |
| Z                                                                      | 2                                               | 4                                                               | 4                                               |
| a, Å                                                                   | 6.2326(2)                                       | 14.6132(3)                                                      | 9.4015(3)                                       |
| b, Å                                                                   | 11.4806(3)                                      | 11.9428(2)                                                      | 10.3300(3)                                      |
| c, Å                                                                   | 12.8224(3)                                      | 12.2860(2)                                                      | 16.9651(4)                                      |
| $\alpha$ , °                                                           | 112.9640(10)                                    | 90                                                              | 90                                              |
| $\beta$ , °                                                            | 93.655(2)                                       | 93.8750(10)                                                     | 90                                              |
| $\gamma$ , °                                                           | 100.291(2)                                      | 90                                                              | 90                                              |
| V, Å <sup>3</sup>                                                      | 822.12(4)                                       | 2139.28(7)                                                      | 1647.61(8)                                      |
| $D_{\text{calc}}$ (g cm <sup>-3</sup> )                                | 1.347                                           | 1.494                                                           | 1.271                                           |
| Linear absorption, $\mu$ (cm <sup>-1</sup> )                           | 0.98                                            | 5.81                                                            | 0.9                                             |
| F(000)                                                                 | 356                                             | 992                                                             | 672                                             |
| 2 $\theta_{\text{max}}$ , °                                            | 58                                              | 58                                                              | 56                                              |
| Reflections measured                                                   | 11065                                           | 27809                                                           | 20562                                           |
| Independent reflections                                                | 4366                                            | 5680                                                            | 3988                                            |
| Observed reflections [ $I > 2\sigma(I)$ ]                              | 3329                                            | 5377                                                            | 3688                                            |
| Parameters                                                             | 221                                             | 262                                                             | 214                                             |
| R1                                                                     | 0.0443                                          | 0.0287                                                          | 0.0334                                          |
| wR2                                                                    | 0.1108                                          | 0.0748                                                          | 0.0796                                          |
| GOF                                                                    | 1.026                                           | 1.021                                                           | 1.046                                           |
| $\Delta\rho_{\text{max}}/\Delta\rho_{\text{min}}$ (e Å <sup>-3</sup> ) | 0.343/-0.273                                    | 0.779/-0.582                                                    | 0.284/-0.215                                    |

## Preparation of starting compounds

### 6,6-Dimethyl-4-(4-nitrophenyl)-5,6-dihydro-4H-1,2-oxazine 2-oxide 1c

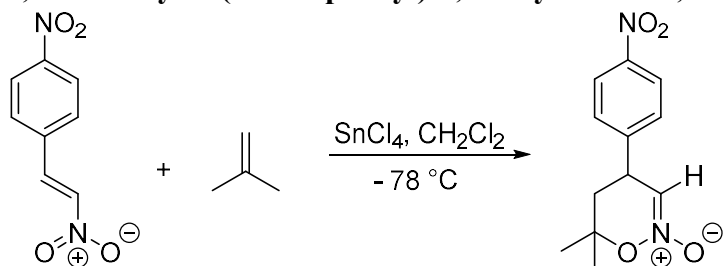

Starting nitroalkene was prepared according to the literature procedure [s7].

To a solution of (*E*)-1-nitro-4-(2-nitrovinyl)benzene (290 mg, 1.49 mmol) in freshly distilled CH<sub>2</sub>Cl<sub>2</sub> (14 mL) SnCl<sub>4</sub> (0.21 mL, 0.47 g, 1.80 mmol) was added at -78 °C under argon atmosphere. The resulting solution was stirred for 5 min and isobutylene (ca. 0.80 g, 14.3 mmol) was added. The reaction mixture was warmed up to -20 °C and maintained at the same temperature overnight. The mixture poured into EtOAc (130 mL) / NaHCO<sub>3</sub> (sat. aq., 100 mL). Organic layer was washed with H<sub>2</sub>O (100 mL), brine (100 mL), dried over Na<sub>2</sub>SO<sub>4</sub> and evaporated. Column chromatography (eluent: PE/EtOAc, 3:1, then 1:2) afforded 105 mg (28%) of target nitronate as light yellow powder.

R<sub>f</sub> = 0.29 (EtOAc, UV, anisaldehyde).

mp = 97-99 °C (THF).

<sup>1</sup>H NMR (300 MHz, CDCl<sub>3</sub>): δ 1.48 (s, 3H, Me(6)), 1.54 (s, 3H, Me(6)), 1.85 (dd, *J* = 13.7, 10.9 Hz, 1H, CH<sub>2ax</sub>(5)), 2.11 (dd, *J* = 13.7, 7.4 Hz, 1H, CH<sub>2eq</sub>(5)), 4.00 (ddd, *J* = 10.9, 7.4, 2.9 Hz, 1H, CH(4)), 6.42 (d, *J* = 2.9 Hz, 1H, CH(3)=N), 7.45 (d, *J* = 8.7 Hz, 2H, CH<sub>Ar</sub>), 8.23 (d, *J* = 8.7 Hz, 2H, CH<sub>Ar</sub>).

<sup>13</sup>C NMR (75 MHz, DEPT, CDCl<sub>3</sub>): δ 22.6 (Me(6)), 22.7 (Me(6)), 38.6 (CH(4)), 39.1 (CH<sub>2</sub>(5)), 82.7 (C(6)), 111.6 (CH(3)=N), 124.5 (CH<sub>Ar</sub>), 128.6 (CH<sub>Ar</sub>), 147.2 (C<sub>Ar</sub>), 147.5 (C<sub>Ar</sub>).

HRMS (ESI): *m/z* calcd. for [C<sub>12</sub>H<sub>14</sub>N<sub>2</sub>O<sub>4</sub>+H<sup>+</sup>]: 251.1026, found: 251.1031.

### 4-(3-Methoxyphenyl)-6,6-dimethyl-5,6-dihydro-4H-1,2-oxazine 2-oxide 1d

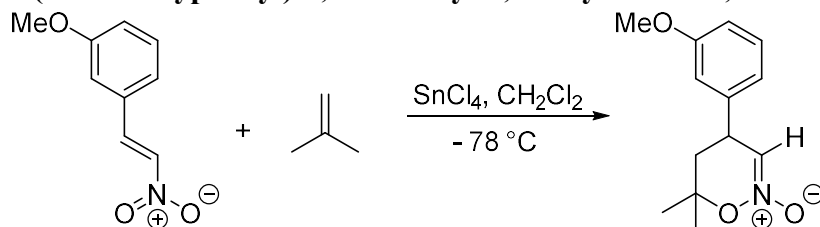

Starting nitroalkene was prepared according to the literature procedure [s8].

To a solution of (*E*)-1-methoxy-3-(2-nitrovinyl)benzene (278 mg, 1.55 mmol) in freshly distilled CH<sub>2</sub>Cl<sub>2</sub> (15 mL) SnCl<sub>4</sub> (0.22 mL, 0.48 g, 1.86 mmol) was added at -78 °C under argon atmosphere. The resulting solution was stirred for 5 min and isobutylene (ca. 0.40 g, 7.1 mmol) was added. The reaction mixture was stirred for 15 min at -78 °C and poured into EtOAc (130 mL) / NaHCO<sub>3</sub> (sat. aq., 100 mL). Organic layer was washed with H<sub>2</sub>O (100 mL), brine (100 mL), dried over Na<sub>2</sub>SO<sub>4</sub> and evaporated. Crystallization of the residue from PE/EtOAc (10:1) afforded 233 mg (64%) of target nitronate as brownish powder.

mp = 80-82 °C (PE/EtOAc, 3:1).

<sup>1</sup>H NMR (300 MHz, COSY, CDCl<sub>3</sub>): δ 1.46 (s, 3H, Me(6)), 1.52 (s, 3H, Me(6)), 1.86 (dd, *J* = 13.8, 11.6 Hz, 1H, CH<sub>2ax</sub>(5)), 2.11 (dd, *J* = 13.8, 7.3 Hz, 1H, CH<sub>2eq</sub>(5)), 3.81 (s, 3H, OMe), 3.77-3.84 (m, overlapped, 1H, CH(4)), 6.43 (d, *J* = 3.0 Hz, 1H, CH(3)=N), 6.76 (s, 1H, CH<sub>Ar</sub>), 6.81-6.86 (m, 2H, CH<sub>Ar</sub>), 7.26-7.31 (m, 1H, CH<sub>Ar</sub>).

<sup>13</sup>C NMR (75 MHz, DEPT, HSQC, CDCl<sub>3</sub>): δ 22.7 (Me(6)), 27.8 (Me(6)), 38.8 (CH(4)), 39.3 (CH<sub>2</sub>(5)), 55.3 (OMe), 82.6 (C(6)), 113.2 and 113.5 (2×CH<sub>Ar</sub> and CH(3)=N), 119.8 (CH<sub>Ar</sub>), 130.2 (CH<sub>Ar</sub>), 141.3 (C<sub>Ar</sub>), 160.2 (C<sub>Ar</sub>-OMe).

HRMS (ESI):  $m/z$  calcd. for  $[C_{13}H_{17}NO_3+H^+]$ : 236.1281, found: 236.1277.

#### 4-(2-Chlorophenyl)-6,6-dimethyl-5,6-dihydro-4H-1,2-oxazine 2-oxide 1e

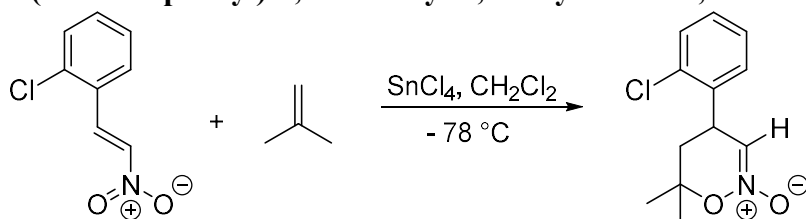

Starting nitroalkene was prepared according to the literature procedure [s9].

To a solution of (*E*)-1-chloro-2-(2-nitrovinyl)benzene (0.37 g, 2.02 mmol) in freshly distilled  $CH_2Cl_2$  (13 mL)  $SnCl_4$  (0.28 mL, 0.62 g, 2.40 mmol) was added at  $-78\text{ }^\circ C$  under argon atmosphere. The resulting solution was stirred for 5 min and isobutylene (ca. 0.40 g, 7.1 mmol) was added. The reaction mixture was stirred for 10 min at  $-78\text{ }^\circ C$  and poured into EtOAc (130 mL) /  $NaHCO_3$  (sat. aq., 100 mL). Organic layer was washed with  $H_2O$  (100 mL), brine (100 mL), dried over  $Na_2SO_4$  and evaporated. Crystallization of the residue from  $Et_2O$  afforded 0.34 g (71%) of target nitronate as white powder.

mp =  $114\text{--}115\text{ }^\circ C$  ( $Et_2O$ ).

$^1H$  NMR (300 MHz,  $CDCl_3$ ):  $\delta$  1.46 (s, 3H, Me(6)), 1.55 (s, 3H, Me(6)), 1.72 (app t,  $J = 12.3$ , 1H,  $CH_{2ax}(5)$ ), 2.27 (dd,  $J = 13.5$ , 7.2 Hz, 1H,  $CH_{2eq}(5)$ ), 4.36 (m, app t,  $J = 7.6$  Hz, 1H, CH(4)), 6.43 (br s, 1H, CH(3)=N), 7.19–7.45 (m, 4H,  $CH_{Ar}$ ).

$^{13}C$  NMR (75 MHz, DEPT,  $CDCl_3$ ):  $\delta$  22.5 (Me(6)), 27.7 (Me(6)), 35.7 (CH(4)), 37.0 ( $CH_2(5)$ ), 82.8 (C(6)), 112.7 (CH(3)=N), 127.9 ( $CH_{Ar}$ ), 128.8 ( $CH_{Ar}$ ), 129.1 ( $CH_{Ar}$ ), 130.1 ( $CH_{Ar}$ ), 133.2 ( $C_{Ar}$ ), 137.3 ( $2\times C_{Ar}$ ).

HRMS (ESI):  $m/z$  calcd. for  $[C_{12}H_{14}ClNO_2+H^+]$ : 240.0786, found: 240.0789.

#### 4-(3-(Cyclopentyloxy)-4-methoxyphenyl)-6,6-dimethyl-5,6-dihydro-4H-1,2-oxazine 2-oxide 1f

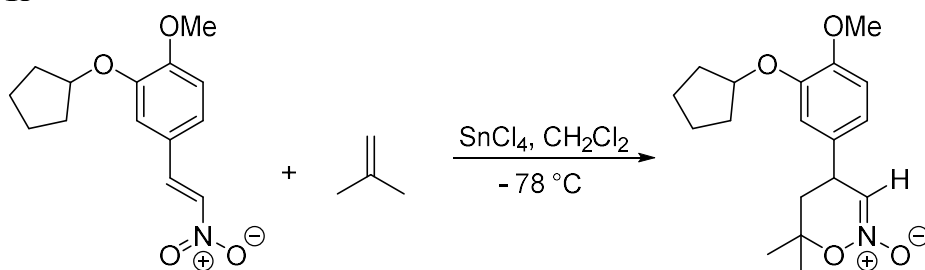

Starting nitroalkene was prepared according to the literature procedure [s10].

To a solution of (*E*)-2-(cyclopentyloxy)-1-methoxy-4-(2-nitrovinyl)benzene (0.37 g, 1.43 mmol) in freshly distilled  $CH_2Cl_2$  (14 mL)  $SnCl_4$  (0.21 mL, 0.47 g, 1.80 mmol) was added at  $-78\text{ }^\circ C$  under argon atmosphere. The resulting solution was stirred for 5 min and isobutylene (ca. 0.40 g, 7.1 mmol) was added. The reaction mixture was stirred for 5 min at  $-78\text{ }^\circ C$  and poured into EtOAc (130 mL) /  $NaHCO_3$  (sat. aq., 100 mL). Organic layer was washed with  $H_2O$  (100 mL), brine (100 mL), dried over  $Na_2SO_4$  and evaporated. Column chromatography (eluent: PE/EtOAc, 2:1, then 1:2) afforded 0.20 g (44%) of target nitronate as colorless oil, which solidified upon storage in a fridge.

$R_f = 0.16$  (PE/EtOAc, 1:1, UV, anisaldehyde).

mp =  $96\text{--}98\text{ }^\circ C$  (EtOAc).

$^1H$  NMR (300 MHz,  $CDCl_3$ ):  $\delta$  1.47 (s, 3H, Me(6)), 1.52 (s, 3H, Me(6)), 1.59–1.68 (m, 2H,  $CH_{2cycl}$ ), 1.80–1.97 (m, 7H,  $3\times CH_{2cycl}$  and  $CH_{2ax}(5)$ ), 2.10 (dd,  $J = 13.8$ , 7.3 Hz, 1H,  $CH_{2eq}(5)$ ), 3.76 (ddd,  $J = 11.5$ , 7.3, 3.1 Hz, 1H, CH(4)), 3.85 (s, 3H, OMe), 4.76–4.81 (m, 1H,  $CH_{cycl-O}$ ), 6.44 (d,  $J = 3.0$  Hz, 1H, CH(3)=N), 6.72 (d,  $J = 2.1$  Hz, 1H,  $CH_{Ar}$ ), 6.76 (dd,  $J = 8.2$ , 2.1 Hz, 1H,  $CH_{Ar}$ ), 6.85 (d,  $J = 8.2$  Hz, 1H,  $CH_{Ar}$ ).



$^{13}\text{C}$  NMR (75 MHz, DEPT,  $\text{CDCl}_3$ ):  $\delta$  22.7 (Me(6)), 24.0 ( $\text{CH}_{2\text{cycl}}$ ), 27.8 (Me(6)), 32.77 and 32.80 ( $\text{CH}_{2\text{cycl}}$ ), 38.4 (CH(4)), 39.5 ( $\text{CH}_2(5)$ ), 56.1 (OMe), 80.6 (C(6)), 82.6 ( $\text{CH}_{\text{cycl}}\text{-O}$ ), 112.4 ( $\text{CH}_{\text{Ar}}$ ), 113.9 ( $\text{CH}(3)=\text{N}$ ), 114.2 ( $\text{CH}_{\text{Ar}}$ ), 119.7 ( $\text{CH}_{\text{Ar}}$ ), 132.0 ( $\text{C}_{\text{Ar}}$ ), 148.2 ( $\text{C}_{\text{Ar}}\text{-O}$ ), 149.7 ( $\text{C}_{\text{Ar}}\text{-O}$ ).

HRMS (ESI):  $m/z$  calcd. for  $[\text{C}_{18}\text{H}_{25}\text{NO}_4+\text{H}^+]$ : 320.1856, found: 320.1857.

**(4S\*,4aR\*,8aR\*)-4-(4-Chlorophenyl)-4a,5,6,7,8,8a-hexahydro-4H-benzo[e][1,2]oxazine 2-oxide 1k**

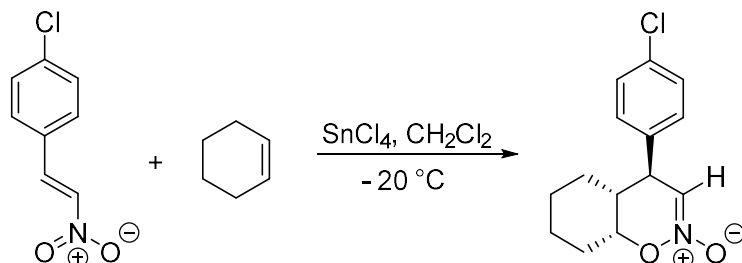

Starting nitroalkene was prepared according to the literature procedure [s11].

To a solution of (*E*)-1-chloro-4-(2-nitrovinyl)benzene (0.92 g, 5.0 mmol) in freshly distilled  $\text{CH}_2\text{Cl}_2$  (25 mL)  $\text{SnCl}_4$  (0.64 mL, 1.42 g, 5.5 mmol) was added at  $-78^\circ\text{C}$  under argon atmosphere. The resulting solution was stirred for 5 min and cyclohexene (1.01 mL, 0.82 g, 10 mmol) was added. The reaction mixture was warmed up to  $-20^\circ\text{C}$  and maintained at the same temperature for 4 d. Then the reaction mixture was poured into EtOAc (130 mL) /  $\text{NaHCO}_3$  (sat. aq., 100 mL). Organic layer was washed with  $\text{H}_2\text{O}$  (100 mL), brine (100 mL), dried over  $\text{Na}_2\text{SO}_4$  and evaporated. Column chromatography (eluent: PE/EtOAc, 2:1, then 1:1) afforded crude nitronate as oil, which was crystallized from PE/EtOAc (5:1) to give 0.16 g of target nitronate as white powder. Recrystallization of mother liquor afforded 0.43 g of target nitronate as light grey powder. Total yield: 0.59 g (45%).

$R_f$  = 0.36 (PE/EtOAc, 1:1, UV, anisaldehyde).

mp =  $94\text{--}95^\circ\text{C}$  (PE/EtOAc, 5:1).

$^1\text{H}$  NMR (300 MHz,  $\text{CDCl}_3$ ):  $\delta$  1.25–1.86 (m, 8H) and 2.07–2.15 (m, 1H) ( $4\times\text{CH}_2$  and CH(4a)), 3.50 (dd,  $J$  = 4.4, 1.3 Hz, 1H, CH(4)), 4.53–4.57 (m, 1H, CH(8a)–O), 6.42 (d,  $J$  = 4.4 Hz, 1H, CH(3)=N), 7.18 (d,  $J$  = 8.5 Hz, 2H,  $\text{CH}_{\text{Ar}}$ ), 7.37 (d,  $J$  = 8.5 Hz, 2H,  $\text{CH}_{\text{Ar}}$ ).

$^{13}\text{C}$  NMR (75 MHz, DEPT,  $\text{CDCl}_3$ ):  $\delta$  20.0, 24.5, 27.6, and 28.6 ( $4\times\text{CH}_2$ ), 39.2 (CH), 44.8 (CH), 76.5 (CH–O), 111.3 (CH(3)=N), 129.0 ( $\text{CH}_{\text{Ar}}$ ), 129.3 ( $\text{CH}_{\text{Ar}}$ ), 133.7 ( $\text{C}_{\text{Ar}}$ ), 139.9 ( $\text{C}_{\text{Ar}}$ ).

HRMS (ESI):  $m/z$  calcd. for  $[\text{C}_{14}\text{H}_{16}\text{ClNO}_2+\text{H}^+]$ : 266.0942, found: 266.0947.

**2,2,2-Trichloroethyl 3-oxobutanoate**

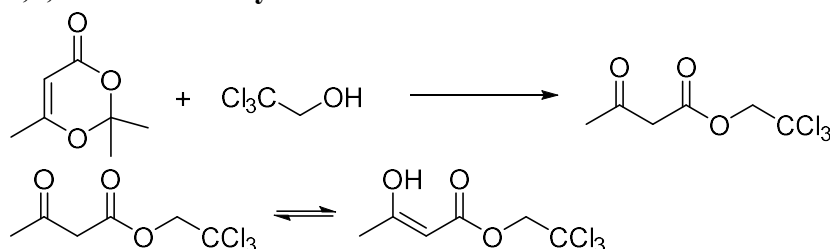

2,2,2-Trichloroethanol (12.0 g, 80 mmol), 2,2,6-trimethyl-4H-1,3-dioxin-4-one (11.4 g, 80 mmol, 1 equiv.) and *p*-xylene (20 mL) was placed in a flask equipped with a Vigreux column and a distilling link. The flask was stirred and heated to  $160^\circ\text{C}$  (oil bath) for 40 min. until the acetone was distilled off (vapor temp.  $56^\circ\text{C}$ ). Then the apparatus was connected to a vacuum pump and xylene was distilled off at 60 mmHg (vapor temp.  $60\text{--}61^\circ\text{C}$ ). The residue was transferred to another apparatus and distilled under reduced pressure to give 15.4 g (82%) of target acetoacetate as colorless oil.

bp  $70\text{--}77^\circ\text{C}/1.7\text{ mmHg}$ . (lit. [s12]  $115^\circ\text{C}/10\text{ mmHg}$ .)

After the distillation the ratio of keto-form:enol-form = 45:55. Upon standing the amount of keto-form increased.

Keto-form:

$^1\text{H}$  NMR (300 MHz,  $\text{CDCl}_3$ ):  $\delta$  2.34 (s, 3H, Me), 3.63 (s, 2H,  $\text{CH}_2$ ), 4.82 (s, 2H,  $\text{OCH}_2$ ).

$^{13}\text{C}$  NMR (75 MHz, DEPT, HSQC, HMBC,  $\text{CDCl}_3$ ):  $\delta$  30.3 (Me), 49.5 ( $\text{CH}_2$ ), 74.4 ( $\text{OCH}_2$ ), 94.4 ( $\text{CCl}_3$ ), 165.5 ( $\text{CO}_2$ ), 199.2 ( $\text{C=O}$ ).

Enol-form:

$^1\text{H}$  NMR (300 MHz,  $\text{CDCl}_3$ ):  $\delta$  2.04 (s, 3H, Me), 4.81 (s, 2H,  $\text{OCH}_2$ ), 5.18 (s, 1H,  $=\text{CH}$ ), 11.68 (s, 1H, OH).

$^{13}\text{C}$  NMR (75 MHz, DEPT, HSQC, HMBC,  $\text{CDCl}_3$ ):  $\delta$  21.4 (Me), 73.4 ( $\text{OCH}_2$ ), 88.8 ( $=\text{CH}$ ), 95.0 ( $\text{CCl}_3$ ), 170.6 ( $\text{CO}_2$ ), 177.7 ( $=\text{C-O}$ ).

NMR matches previously reported data [s13].

## 2,2,2-Trichloroethyl 2-diazobut-3-enoate **2a**

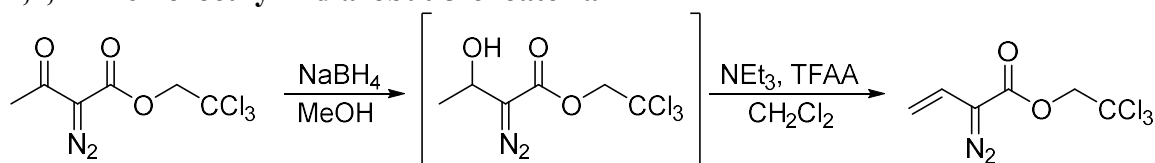

Following a modified literature procedure [s14] to a stirring solution of 2,2,2-trichloroethyl 3-oxobutanoate (1.32 g, 5.1 mmol) in MeOH (5 mL)  $\text{NaBH}_4$  (0.23 g, 6.1 mmol) was added portionwise during 20 min at 0 °C under an argon atmosphere. The resulting mixture was slowly warmed up to r.t. (appr. 0.5 h), stirred for 0.5 h, and  $\text{H}_2\text{O}$  (0.50 mL) was added. The reaction mixture was stirred for another 0.5 h and transferred into  $\text{CH}_2\text{Cl}_2$  (40 mL) /  $\text{H}_2\text{O}$  (30 mL). The aqueous layer was washed with  $\text{CH}_2\text{Cl}_2$  (2  $\times$  20 mL). The combined organic layer was washed with brine (40 mL), dried ( $\text{Na}_2\text{SO}_4$ ) and evaporated. The residue was dissolved in  $\text{CH}_2\text{Cl}_2$  (10 mL) and cooled to 0 °C. To the resulting solution  $\text{NEt}_3$  (2.8 mL, 2.0 g, 20 mmol) was added. Then a solution of TFAA (1.10 mL, 1.66 g, 7.9 mmol) in  $\text{CH}_2\text{Cl}_2$  (4 mL) was added dropwise during 5 min. The reaction mixture was maintained at the same temperature overnight, then concentrated to *ca.* 1.0 mL and subjected to column chromatography on silica gel (eluent: PE, then PE/ $\text{CH}_2\text{Cl}_2$ , 10:1) to give 0.63 g (51%) of target vinyl diazoacetate **2a** as orange oil. It was immediately dissolved in freshly distilled THF and placed over MS 4 Å. The resulting solution can be stored at -20 °C for several months. Concentration of **2a** was determined by  $^1\text{H}$  NMR with the use of dimethyl terephthalate as internal standard.

$R_f$  = 0.59 (PE/EtOAc, 3:1, UV, anisaldehyde).

NMR matches previously reported data [s15].

## 4-Nitrobenzyl 2-diazobut-3-enoate **2e**

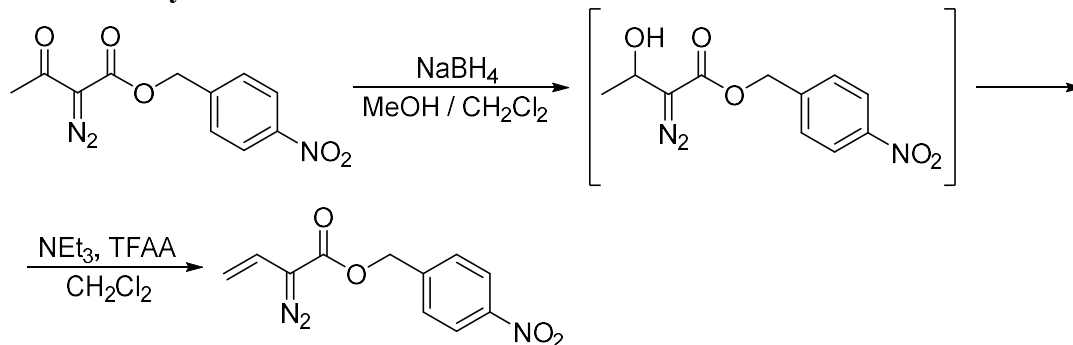

Starting diazoacetoacetate was prepared according to the literature procedure [s16].

Following a modified literature procedure [s14] to a stirring suspension of 4-nitrobenzyl 2-diazo-3-oxobutanoate (0.40 g, 1.54 mmol) in MeOH /  $\text{CH}_2\text{Cl}_2$  (3 mL / 1 mL)  $\text{NaBH}_4$  (70 mg, 1.84 mmol) was added portionwise during 5 min at 0 °C under an argon atmosphere. The resulting mixture was slowly warmed up to r.t. (appr. 0.5 h), stirred for 2 h, and  $\text{H}_2\text{O}$  (0.15 mL) was

added. The reaction mixture was stirred for another 0.5 h and transferred into CH<sub>2</sub>Cl<sub>2</sub> (25 mL) / H<sub>2</sub>O (15 mL). The aqueous layer was washed with CH<sub>2</sub>Cl<sub>2</sub> (2 × 10 mL). The combined organic layer was washed with brine (20 mL), dried (Na<sub>2</sub>SO<sub>4</sub>) and evaporated. The residue was dissolved in CH<sub>2</sub>Cl<sub>2</sub> (3.2 mL) and cooled to 0 °C. To the resulting solution NEt<sub>3</sub> (0.86 mL, 0.62 g, 6.1 mmol) was added, then a solution of TFAA (0.32 mL, 0.48 g, 2.30 mmol) in CH<sub>2</sub>Cl<sub>2</sub> (0.75 mL) was added dropwise. The reaction mixture was warmed to r.t. and stirred for 3 h, then concentrated to appr. 0.5 mL and subjected to column chromatography on silica gel (eluent: PE, then PE/CH<sub>2</sub>Cl<sub>2</sub>, 3:1) to give 0.27 g (74%) of target vinyl diazoacetate **2e** as orange powder. R<sub>f</sub> = 0.44 (PE/EtOAc, 3:1, UV, anisaldehyde).

mp = 78-80 °C (THF).

<sup>1</sup>H NMR (300 MHz, CDCl<sub>3</sub>): δ 4.93 (d, *J* = 17.4 Hz, 1H, =CH<sub>2trans</sub>), 5.18 (d, *J* = 11.0 Hz, 1H, =CH<sub>2cis</sub>), 5.36 (s, 2H, OCH<sub>2</sub>), 6.19 (dd, *J* = 17.4, 11.0 Hz, 1H, =CH), 7.54 (d, *J* = 8.7 Hz, 2H, CH<sub>Ar</sub>), 8.25 (d, *J* = 8.7 Hz, 2H, CH<sub>Ar</sub>).

<sup>13</sup>C NMR (75 MHz, DEPT, HMBC, CDCl<sub>3</sub>): δ 65.2 (CH<sub>2</sub>), 108.2 (=CH<sub>2</sub>), 119.9 (=CH), 123.9 (CH<sub>Ar</sub>), 128.4 (CH<sub>Ar</sub>), 143.0 (C<sub>Ar</sub>), 147.8 (C<sub>Ar</sub>-NO<sub>2</sub>), 164.3 (CO<sub>2</sub>). C=N<sub>2</sub> was not observed due to broadening / low intensity.

### Phenyl 2-diazobut-3-enoate **2f**

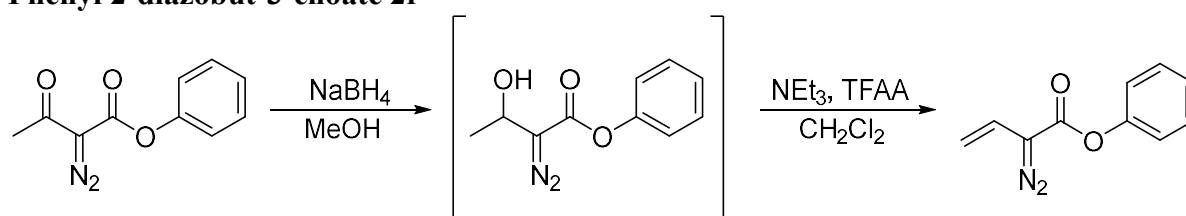

Starting diazoacetoacetate was prepared according to the literature procedure [s17].

Following a modified literature procedure [s14] to a stirring solution of phenyl 2-diazo-3-oxobutanoate (0.43 g, 2.11 mmol) in MeOH (2.1 mL) NaBH<sub>4</sub> (100 mg, 2.63 mmol) was added portionwise during 5 min at 0 °C under an argon atmosphere. The resulting mixture was slowly warmed up to r.t. (appr. 0.5 h), stirred for 2 h, and H<sub>2</sub>O (0.21 mL) was added. The reaction mixture was stirred for another 0.5 h and transferred into CH<sub>2</sub>Cl<sub>2</sub> (25 mL) / H<sub>2</sub>O (15 mL). The aqueous layer was washed with CH<sub>2</sub>Cl<sub>2</sub> (2 × 10 mL). The combined organic layer was washed with brine (20 mL), dried (Na<sub>2</sub>SO<sub>4</sub>) and evaporated. The residue was dissolved in CH<sub>2</sub>Cl<sub>2</sub> (1.7 mL) and cooled to 0 °C. To the resulting solution NEt<sub>3</sub> (1.0 mL, 0.72 g, 7.1 mmol) was added, then a solution of TFAA (0.41 mL, 0.62 g, 2.94 mmol) in CH<sub>2</sub>Cl<sub>2</sub> (4 mL) was added dropwise. The reaction mixture was warmed to r.t. and stirred for 3 h, then concentrated to appr. 0.5 mL and subjected to column chromatography on silica gel (eluent: PE, then PE/CH<sub>2</sub>Cl<sub>2</sub>, 9:1) to give 0.14 g (35%) of target vinyl diazoacetate **2f** as orange oil. The residue was immediately dissolved in freshly distilled THF. Concentration of vinyl diazoacetate **2f** was determined by <sup>1</sup>H NMR with the use of dimethyl terephthalate as internal standard.

R<sub>f</sub> = 0.56 (PE/EtOAc, 3:1, UV, anisaldehyde).

NMR matches previously reported data [s18].

**Table S2. Optimization table for the synthesis of pyrrolooxazine 4a**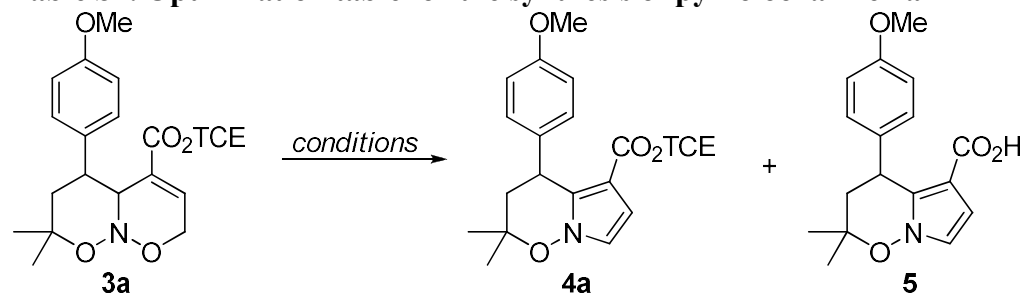

| Nº | Solvent                         | Base (equiv.)              | Additive (equiv.)    | Time   | Recovery of 3a, % | 4a, % | 5, % | Comments          |
|----|---------------------------------|----------------------------|----------------------|--------|-------------------|-------|------|-------------------|
| 1  | MeCN                            | DBU (3)                    | -                    | 20 min | 0                 | 44    | 0    |                   |
| 2  | THF                             | DBU (2)                    | -                    | 1.5 h  | 0                 | 48    | 0    |                   |
| 3  | THF                             | NEt <sub>3</sub> (2)       | -                    | 1 d    | -                 | -     | -    | no reaction (TLC) |
| 4  | THF                             | TCEONa (2, as soln in TCE) | (≈ 20 equiv. of TCE) | 1 d    | 0                 | 35    | 0    |                   |
| 5  | THF                             | TMG (2)                    | -                    | 2 d    | 26                | 6     | 0    |                   |
| 6  | THF                             | DBN (2)                    | -                    | 1 d    | 0                 | 12    | 11   |                   |
| 7  | THF                             | <i>t</i> -BuONa (2)        | <i>t</i> -BuOH (20)  | 1 d    | 0                 | 13    | 37   |                   |
| 8  | -                               | Py (≈ 60 equiv)            | -                    |        | -                 | -     | -    | no reaction (TLC) |
| 9  | THF                             | DBU (2)                    | TCE (10)             | 1 d    | 0                 | 55    | 5    |                   |
| 10 | THF                             | DBU (2)                    | HFIP (10)            | 3 d    | 69                | 22    | 0    |                   |
| 11 | MeCN                            | DBU (2)                    | TCE (10)             | 1 d    | 0                 | 46    | 4    |                   |
| 12 | CH <sub>2</sub> Cl <sub>2</sub> | DBU (2)                    | TCE (10)             | 1 d    | 0                 | 78    | 0    |                   |
| 13 | DCE                             | DBU (2)                    | TCE (10)             | 1 d    | 0                 | 69    | 0    |                   |
| 14 | CH <sub>2</sub> Cl <sub>2</sub> | DBU (2)                    | TCE (5)              | 1 d    | 0                 | 62    | 0    |                   |
| 15 | CH <sub>2</sub> Cl <sub>2</sub> | DBU (2)                    | TCE (5)              | 4 d    | 22                | 45    | 0    | at 0 °C           |
| 16 | CH <sub>2</sub> Cl <sub>2</sub> | DBU (2)                    | -                    | 1.5 h  | 0                 | 53    | 0    |                   |
| 17 | CH <sub>2</sub> Cl <sub>2</sub> | DBU (1)                    | TCE (10)             | 1 d    | 52                | 37    | 0    |                   |

Reactions were performed at r.t., unless otherwise mentioned. Yields were determined by <sup>1</sup>H NMR with internal standard.

TCE = CCl<sub>3</sub>CH<sub>2</sub>-

**Table S3. Optimization of the synthesis of pyrrolooxazine 4b**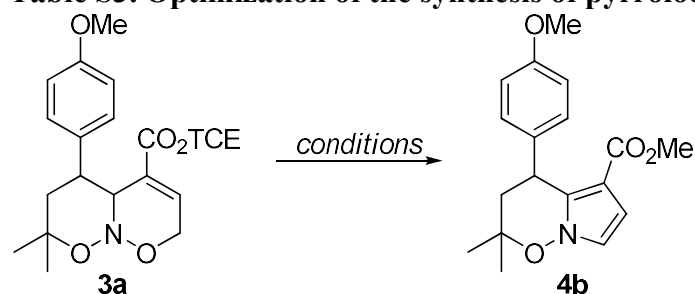

| Nº | Solvent (v/v)                                | Base (equiv.) | Time | Yield 4b, % |
|----|----------------------------------------------|---------------|------|-------------|
| 1  | MeOH (0.2 M)                                 | MeONa (2)     | 1 d  | 53          |
| 2  | MeOH / THF (2:1)                             | MeONa (2)     | 1 d  | 34          |
| 3  | MeOH / CH <sub>2</sub> Cl <sub>2</sub> (2:1) | MeONa (2)     | 1 d  | 57          |
| 4  | MeOH / THF (2:1)                             | DBU (2)       | 5 h  | 56          |
| 5  | MeOH / MeCN (2:1)                            | DBU (2)       | 12 h | 64          |
| 6  | MeOH / CH <sub>2</sub> Cl <sub>2</sub> (2:1) | DBU (2)       | 1 d  | 60          |

Reactions were performed at r.t. at 0.2 M in pure MeOH, or at 0.13 M if a solvent mixture was used.

## References:

- s1. Ushakov, P. Yu.; Tabolin, A. A.; Ioffe, S. L.; Sukhorukov, A. Yu. *Eur. J. Org. Chem.* **2019**, 1888-1892. doi: 10.1002/ejoc.201801761.
- s2. Gorbacheva, E. O.; Tabolin, A. A.; Novikov, R. A.; Khomutova, Yu. A.; Nelyubina, Yu. V.; Tomilov, Yu. V.; Ioffe, S. L. *Org. Lett.* **2013**, *15*, 350-353. doi: 10.1021/ol303292c
- s3. Smirnov, V. O.; Ioffe, S. L.; Tishkov, A. A.; Khomutova, Yu. A.; Nesterov, I. D.; Antipin, M. Yu.; Smit, W. A.; Tartakovsky, V. A. *J. Org. Chem.* **2004**, *69*, 8485-8488. doi: 10.1021/jo048944k.
- s4. Mikhaylov, A. A.; Dilman, A. D.; Khomutova, Yu. A.; Arkhipov, D. E.; Korlyukov, A. A.; Ioffe, S. L. *Eur. J. Org. Chem.* **2013**, 5670-5677. doi: 10.1002/ejoc.201300511.
- s5. Davies, H. M. L.; Hougland, P. W.; Cantrell Jr., W. R. *Synth. Commun.* **1992**, *22*, 971-978. doi: 10.1080/00397919208019285.
- s6. Wu, J.-Q.; Yang, Z.; Zhang, S.-S.; Jiang, C.-Y.; Li, Q.; Huang, Z.-S.; Wang, H. *ACS Catal.* **2015**, *5*, 6453-6457. doi: 10.1021/acscatal.5b01801.
- s7. Xu, C.; Du, J.; Ma, L.; Li, G.; Tao, M.; Zhang, W. *Tetrahedron* **2013**, *69*, 4749-4757. doi: 10.1016/j.tet.2013.02.084.
- s8. Ramirez-Osuna, M.; Chavez, D.; Hernandez, L.; Mollins, E.; Somanathan, R.; Aguirre, G. *Molecules*, **2005**, *10*, 295-301. doi: 10.3390/10010295.
- s9. Jakubec, P.; Cockfield, D. M.; Hynes, P. S.; Cleator, E.; Dixon, D. J. *Tetrahedron Asymm.* **2011**, *22*, 1147-1155. doi: 10.1016/j.tetasy.2011.06.002.
- s10. Wen, L.; Tang, F.; Ge, C.; Wang, X.; Han, Z.; Wu, J. *Synth. Commun.* **2012**, *42*, 3288-3295. doi: 10.1080/00397911.2011.580880.
- s11. Fadeeva, A. A.; Ioffe, S. L.; Tabolin, A. A. *Synthesis* **2020**, *52*, 2679-2688. doi: 10.1055/s-0040-1707396.
- s12. Korte, F.; Wusten, F. *Justus Liebigs Ann. Chem.* **1961**, *647*, 18-22. doi: 10.1002/jlac.19616470104.
- s13. Dolle, F.; Hinnen, F.; Valette, H.; Fuseau, C.; Duval, R.; Peglion, J.-L.; Crouzel, C. *Bioorg. Med. Chem. Lett.* **1997**, *5*, 749-764. doi: 10.1016/S0968-0896(97)00024-2.
- s14. Hansen, J.; Li, B.; Dikarev, E.; Autschbach, J.; Davies, H. M. L. *J. Org. Chem.* **2009**, *74*, 6564-6571. doi: 10.1021/jo900998s.
- s15. Chinthapally, K.; Massaro, N. P.; Ton, S.; Gardner, E. D.; Sharma, I. *Tetrahedron Lett.* **2019**, *60*, 151253. doi: 10.1016/j.tetlet.2019.151253.
- s16. Shved, A. S.; Tabolin, A. A.; Novikov, R. A.; Nelyubina, Yu. A.; Timofeev, V. P.; Ioffe, S. L. *Eur. J. Org. Chem.* **2016**, 5569-5578. doi: 10.1002/ejoc.201600952.
- s17. Rossbach, J.; Baumeister, J.; Harms, K.; Koert, U. *Eur. J. Org. Chem.* **2013**, 662-665. doi: 10.1002/ejoc.201201517.
- s18. Sarabia, F. J.; Li, Q.; Ferreira, E. M. *Angew. Chem. Int. Ed.* **2018**, *57*, 11015-11019. doi: 10.1002/anie.201805732.

## Copies of NMR spectra

**6,6-Dimethyl-4-(4-nitrophenyl)-5,6-dihydro-4H-1,2-oxazine 2-oxide 1c**

$^1\text{H}$  NMR (300 MHz,  $\text{CDCl}_3$ )

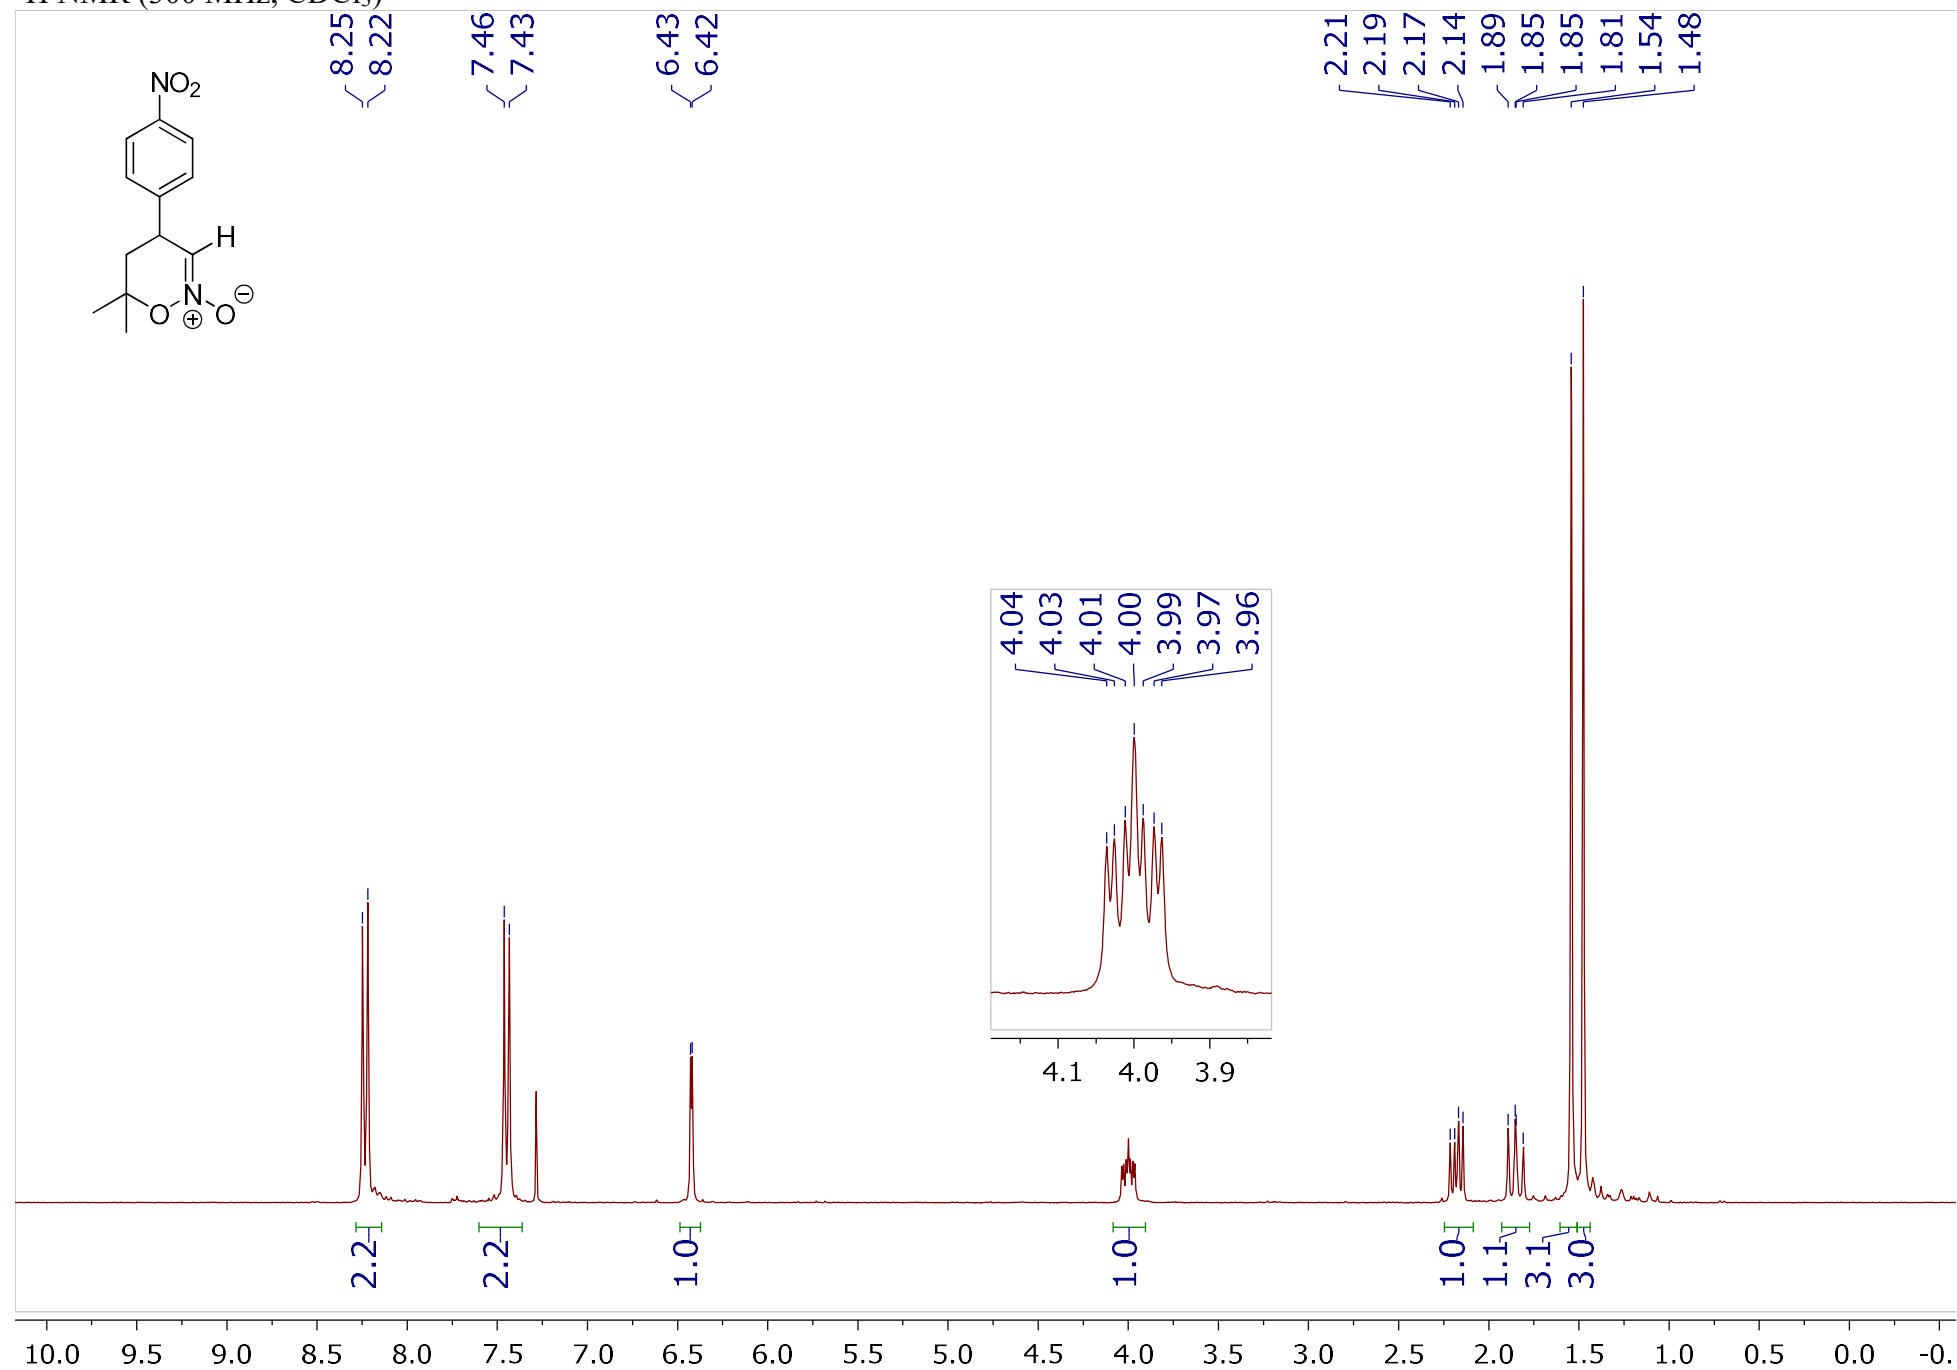

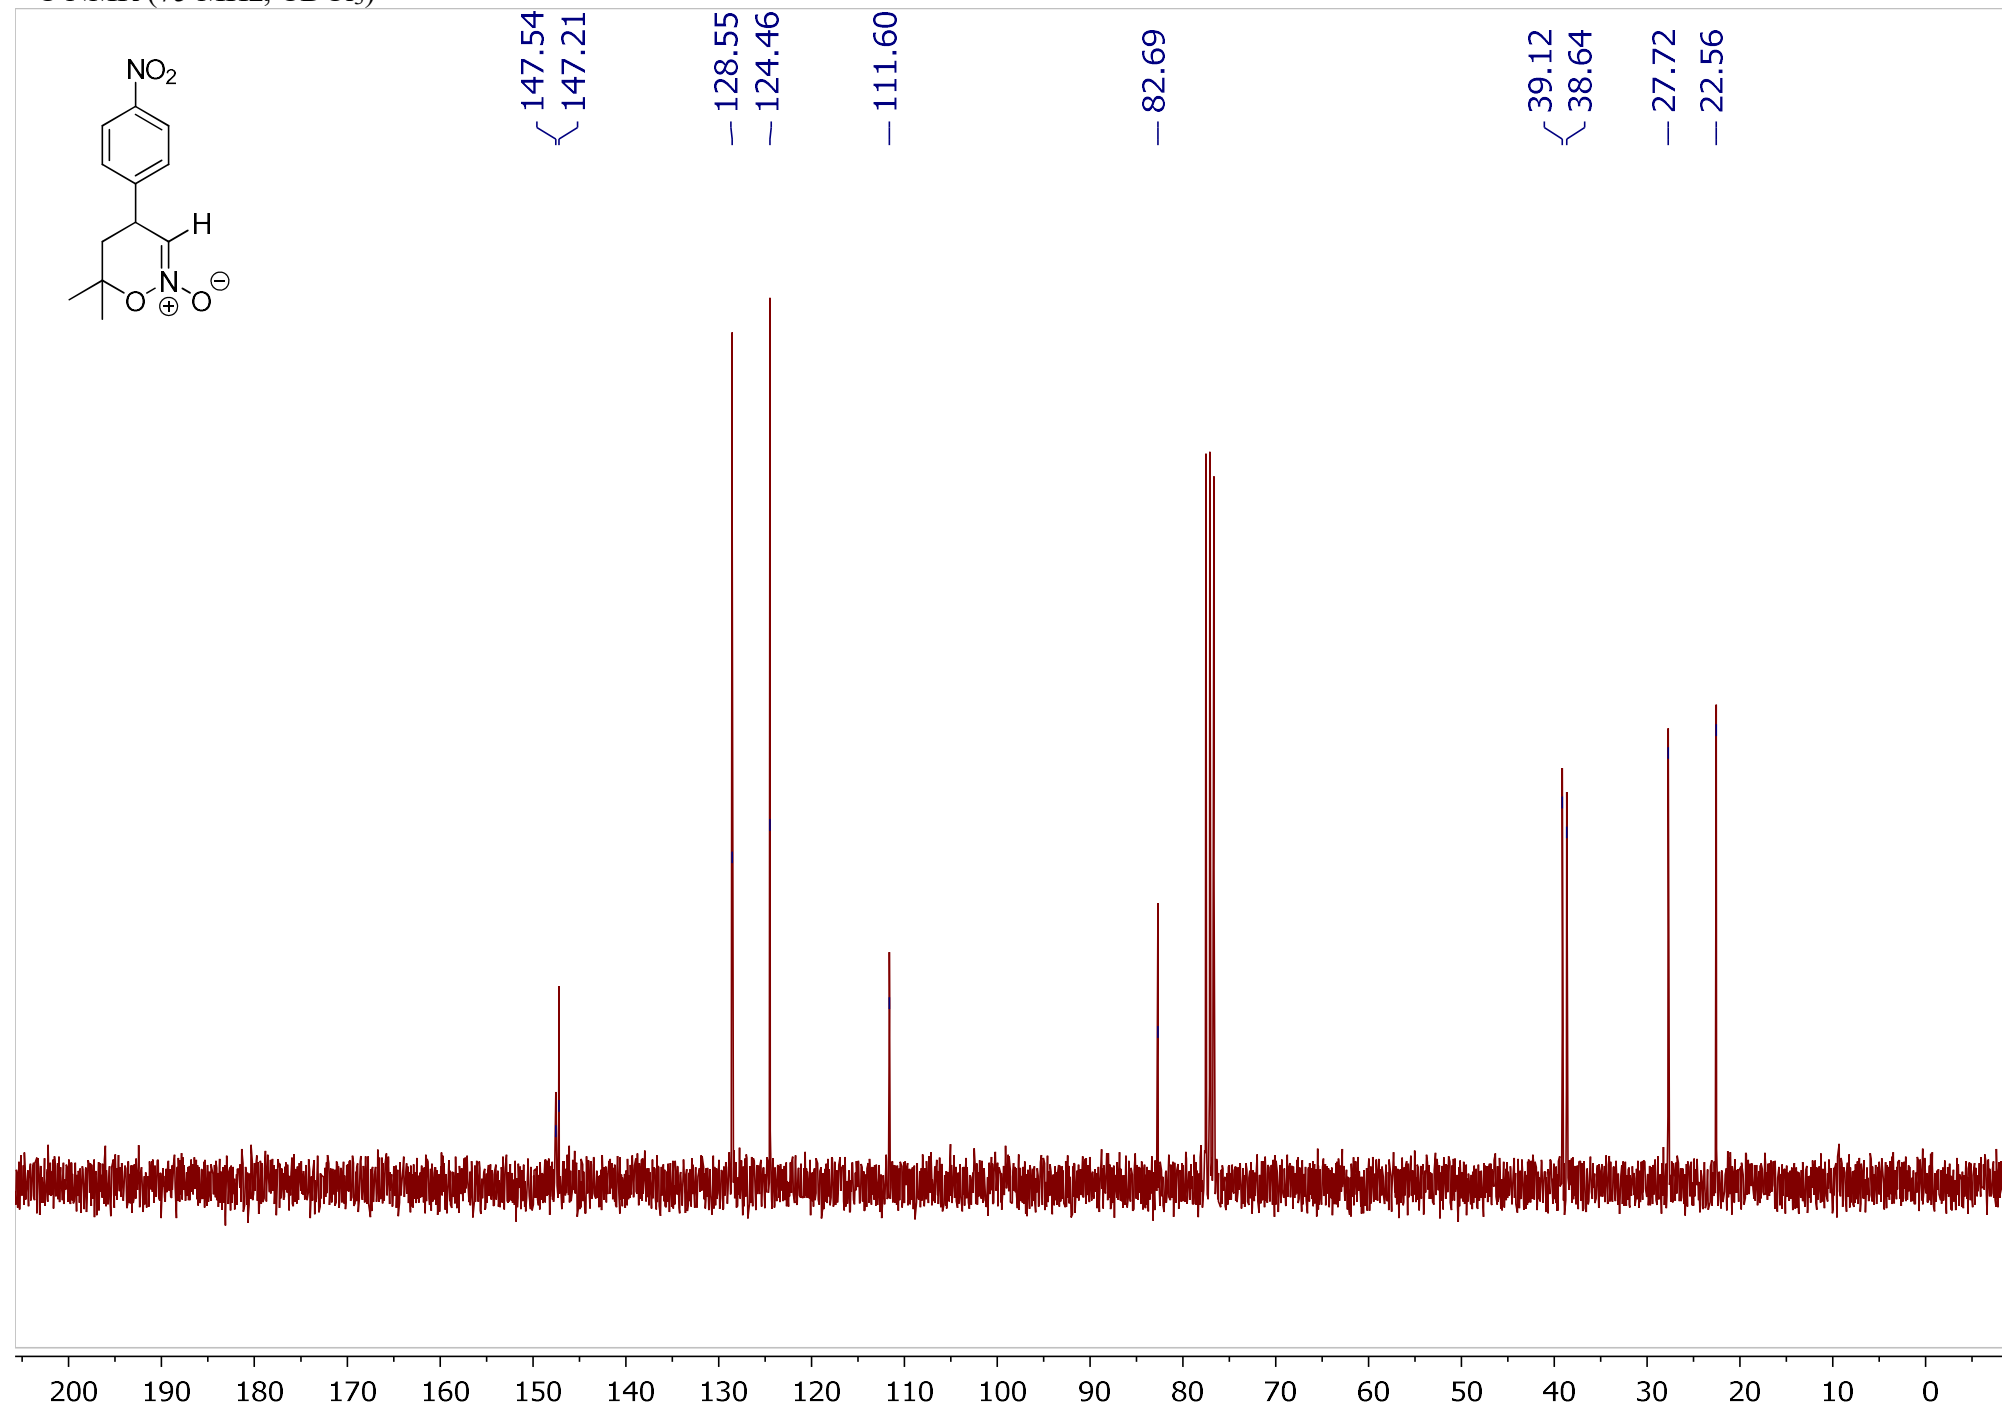



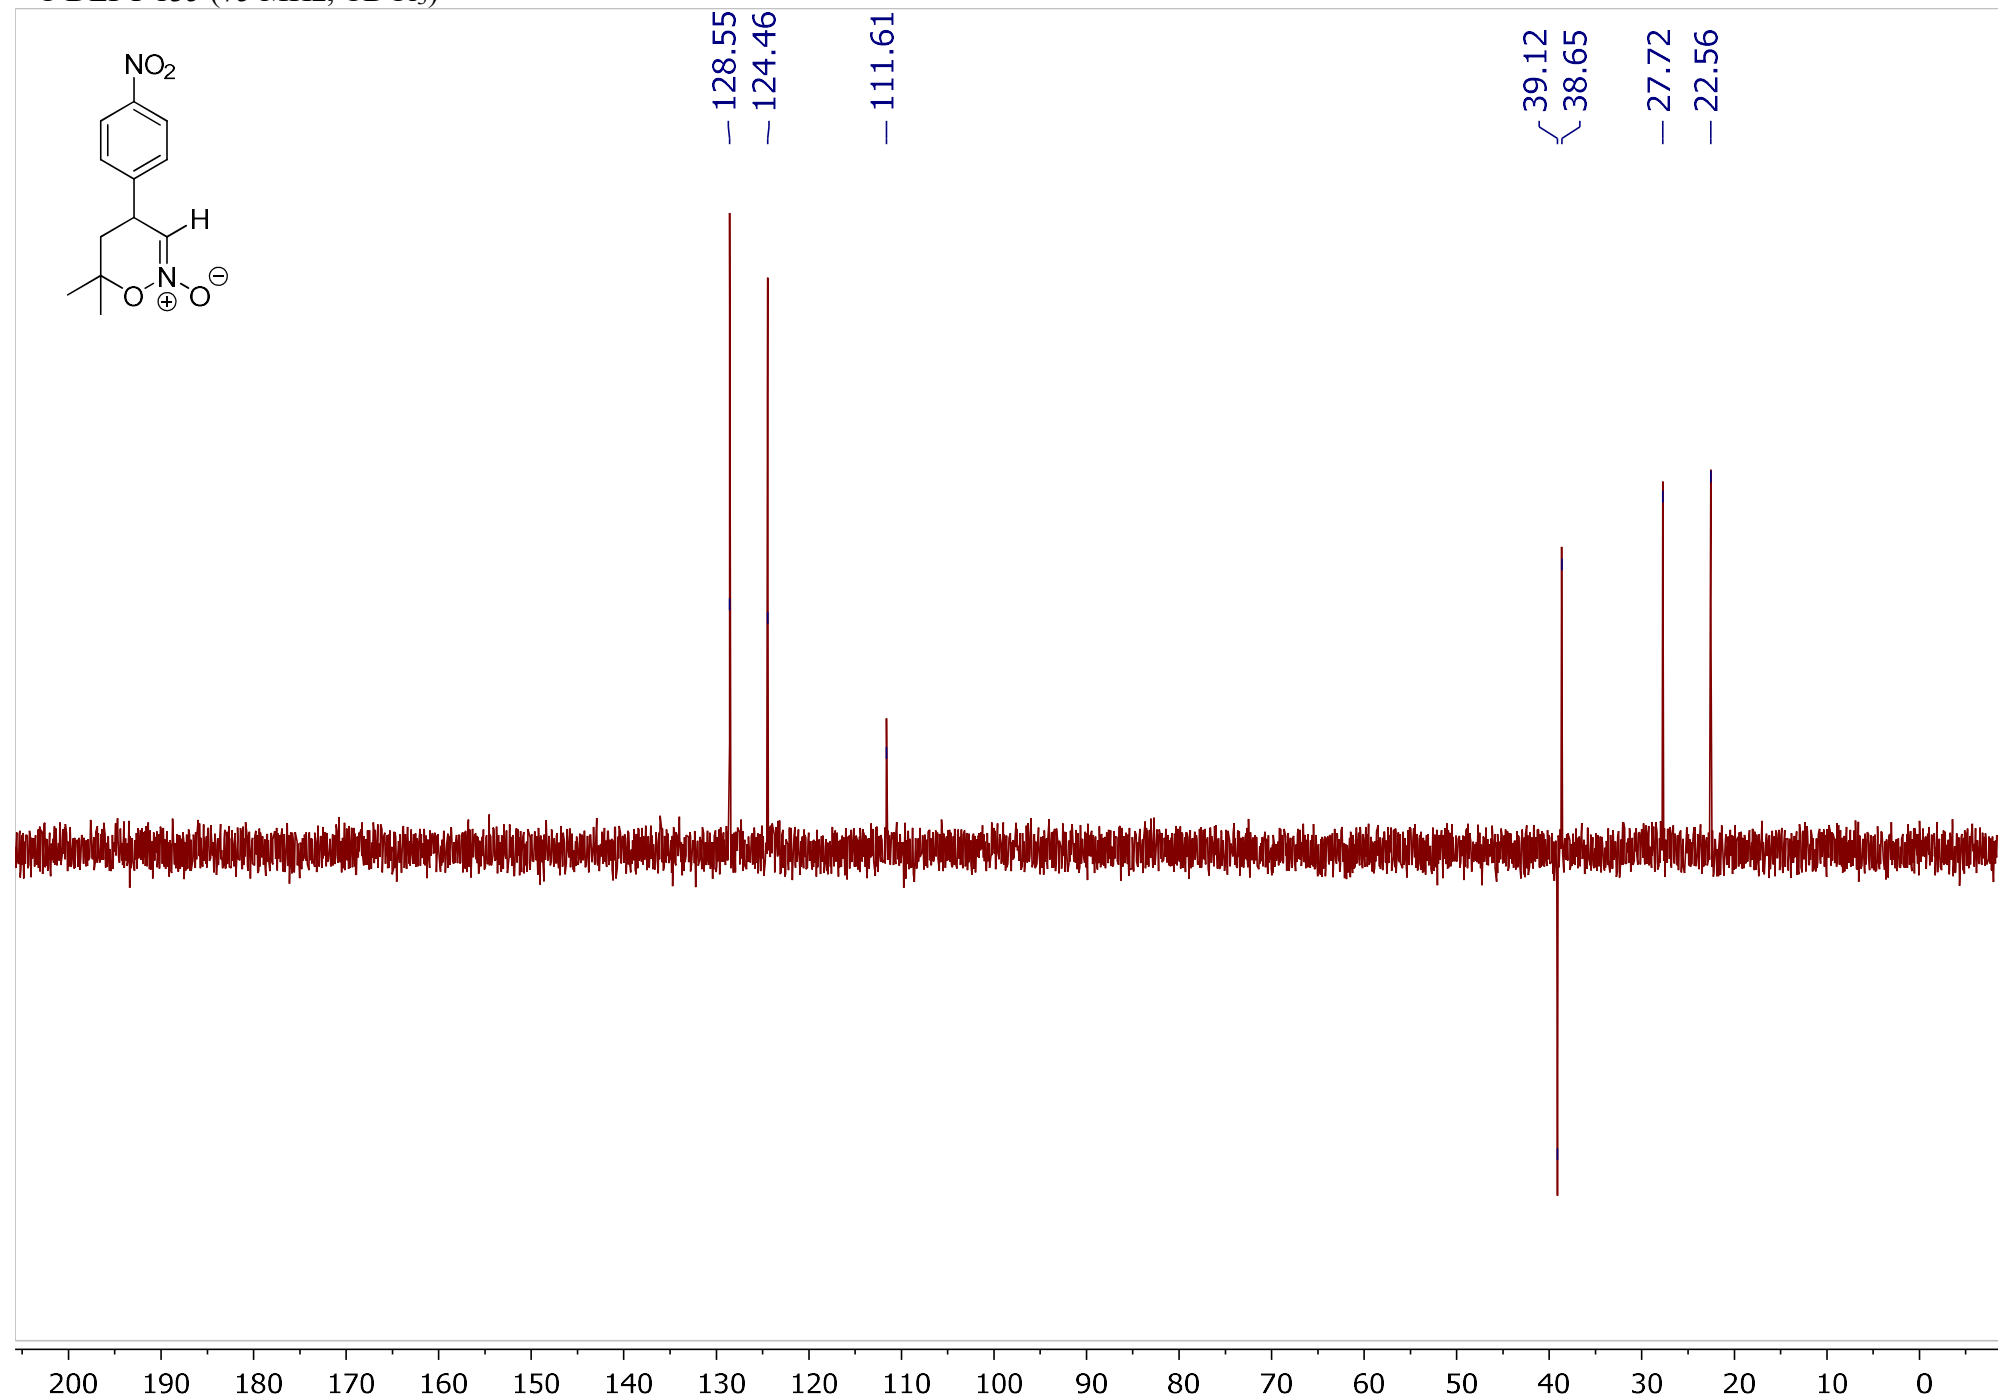

$^1\text{H}$  NMR (300 MHz,  $\text{CDCl}_3$ )

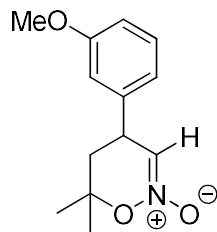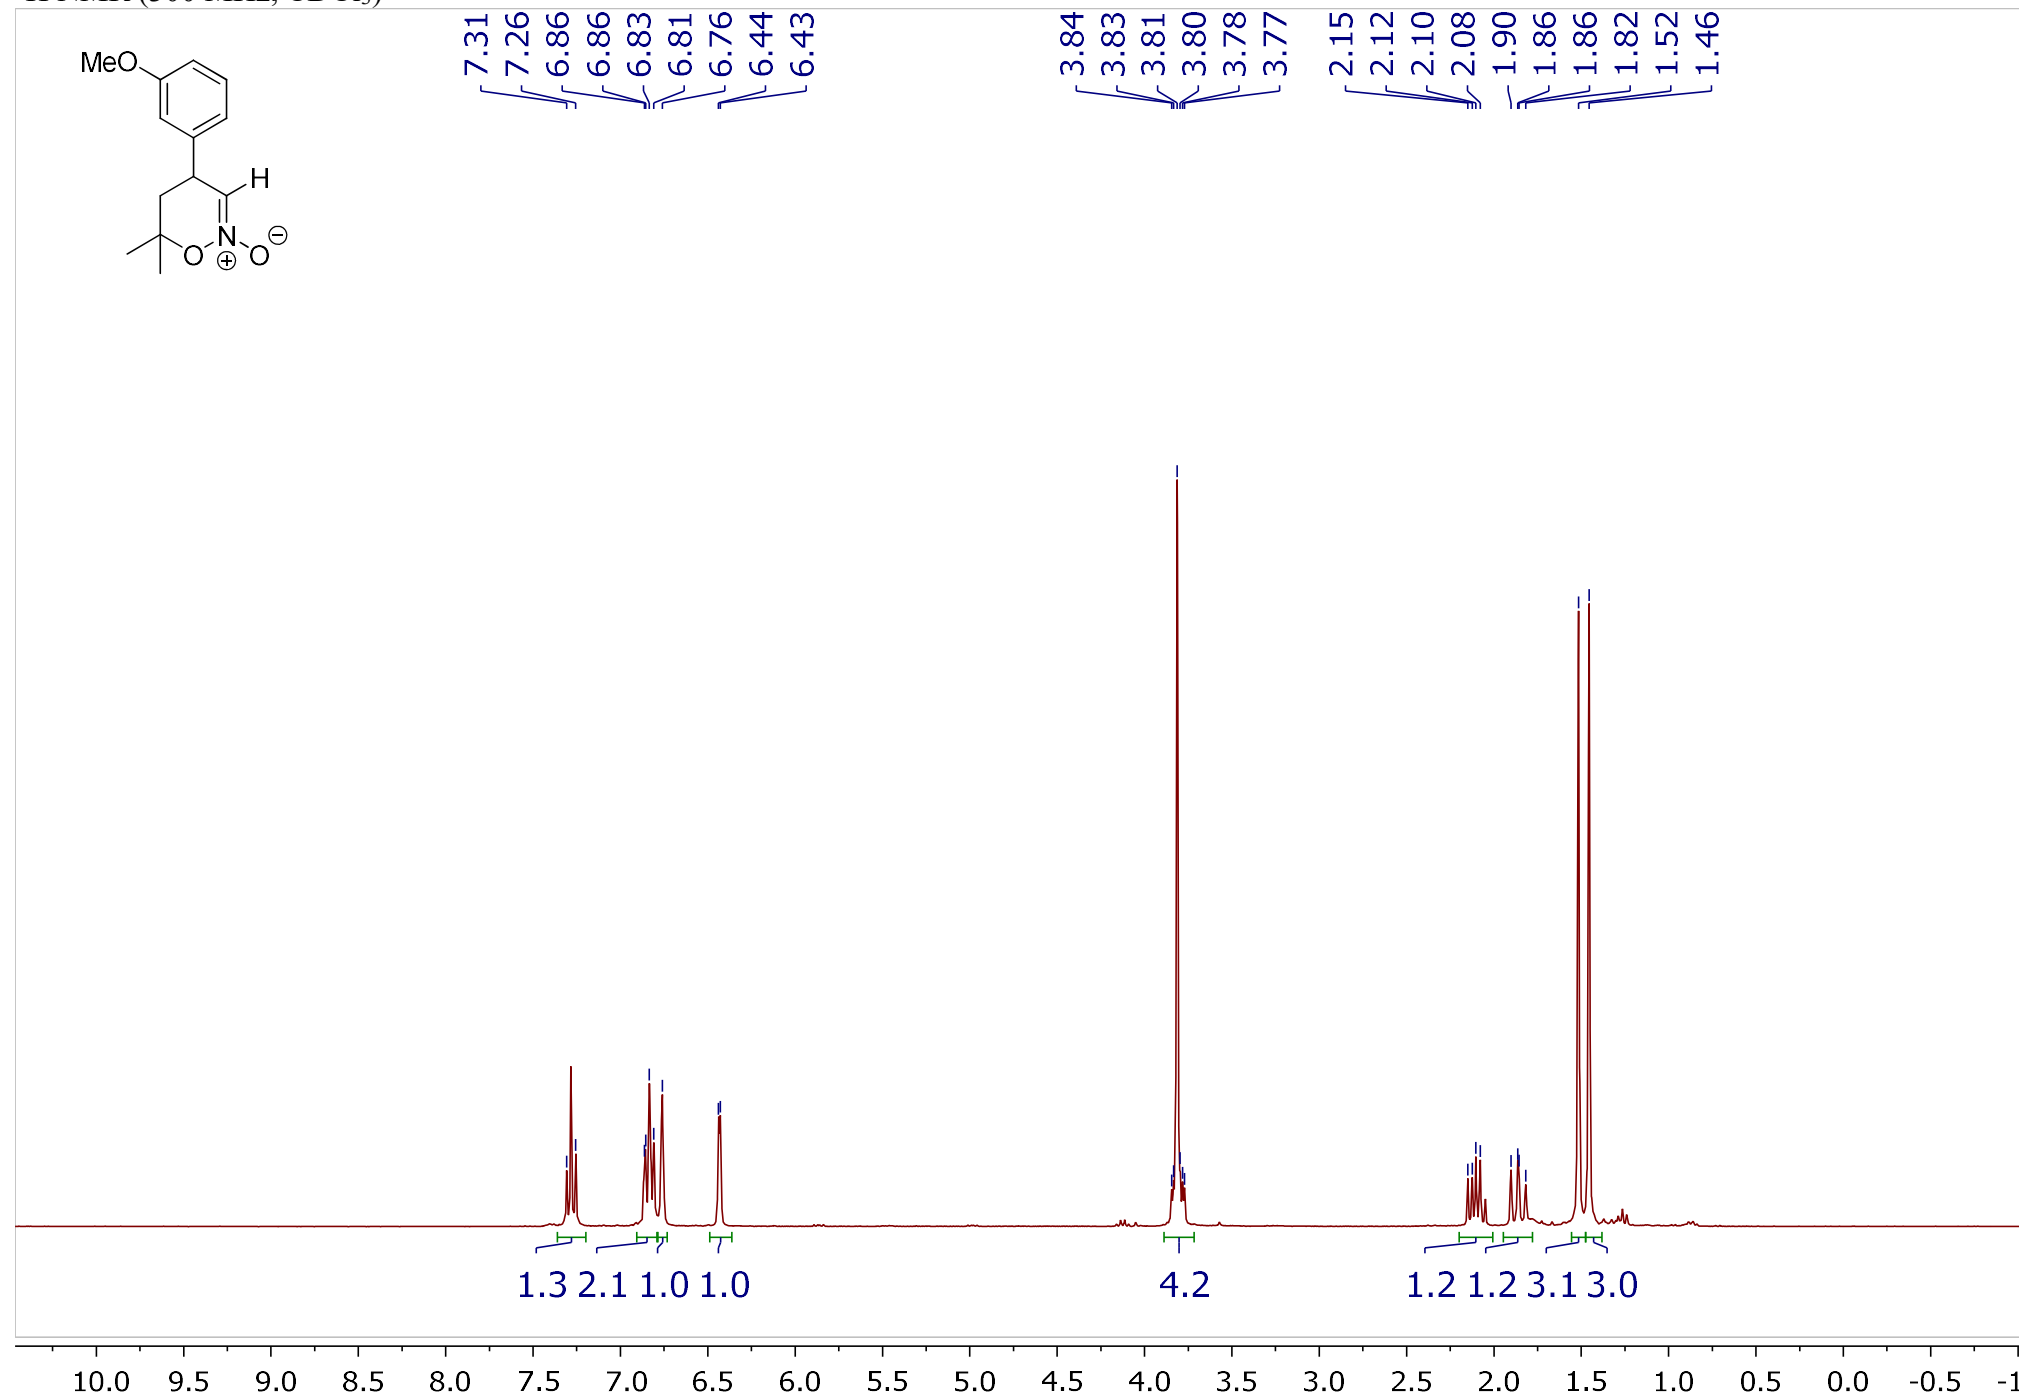

<sup>13</sup>C NMR (75 MHz, CDCl<sub>3</sub>)

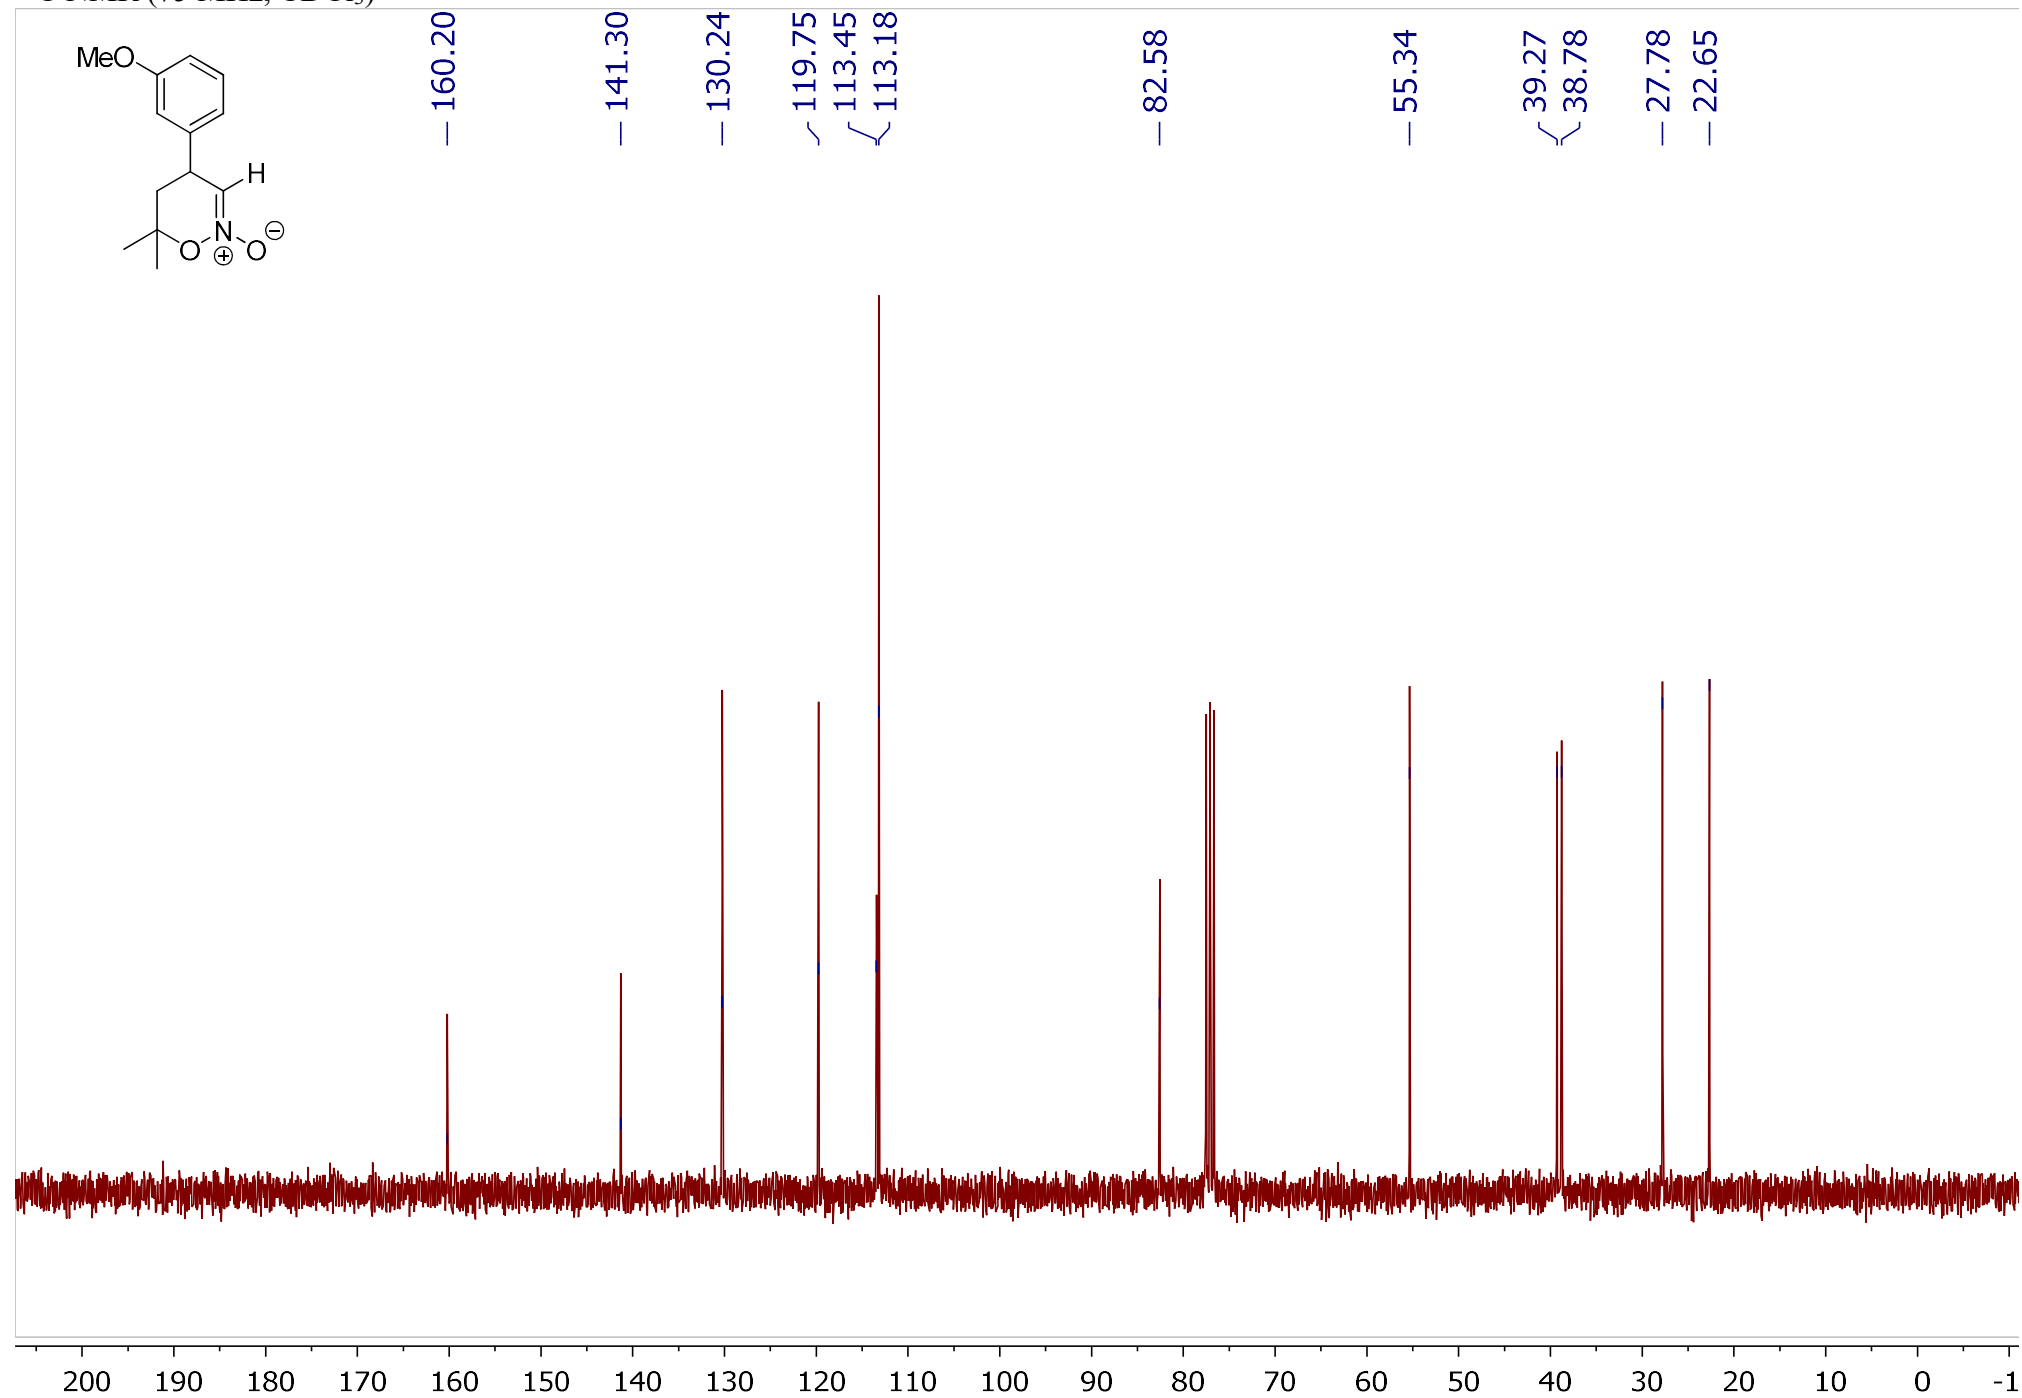

$^{13}\text{C}$  DEPT 135 (75 MHz,  $\text{CDCl}_3$ )

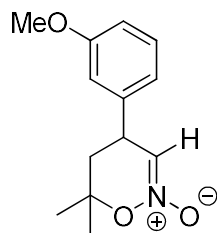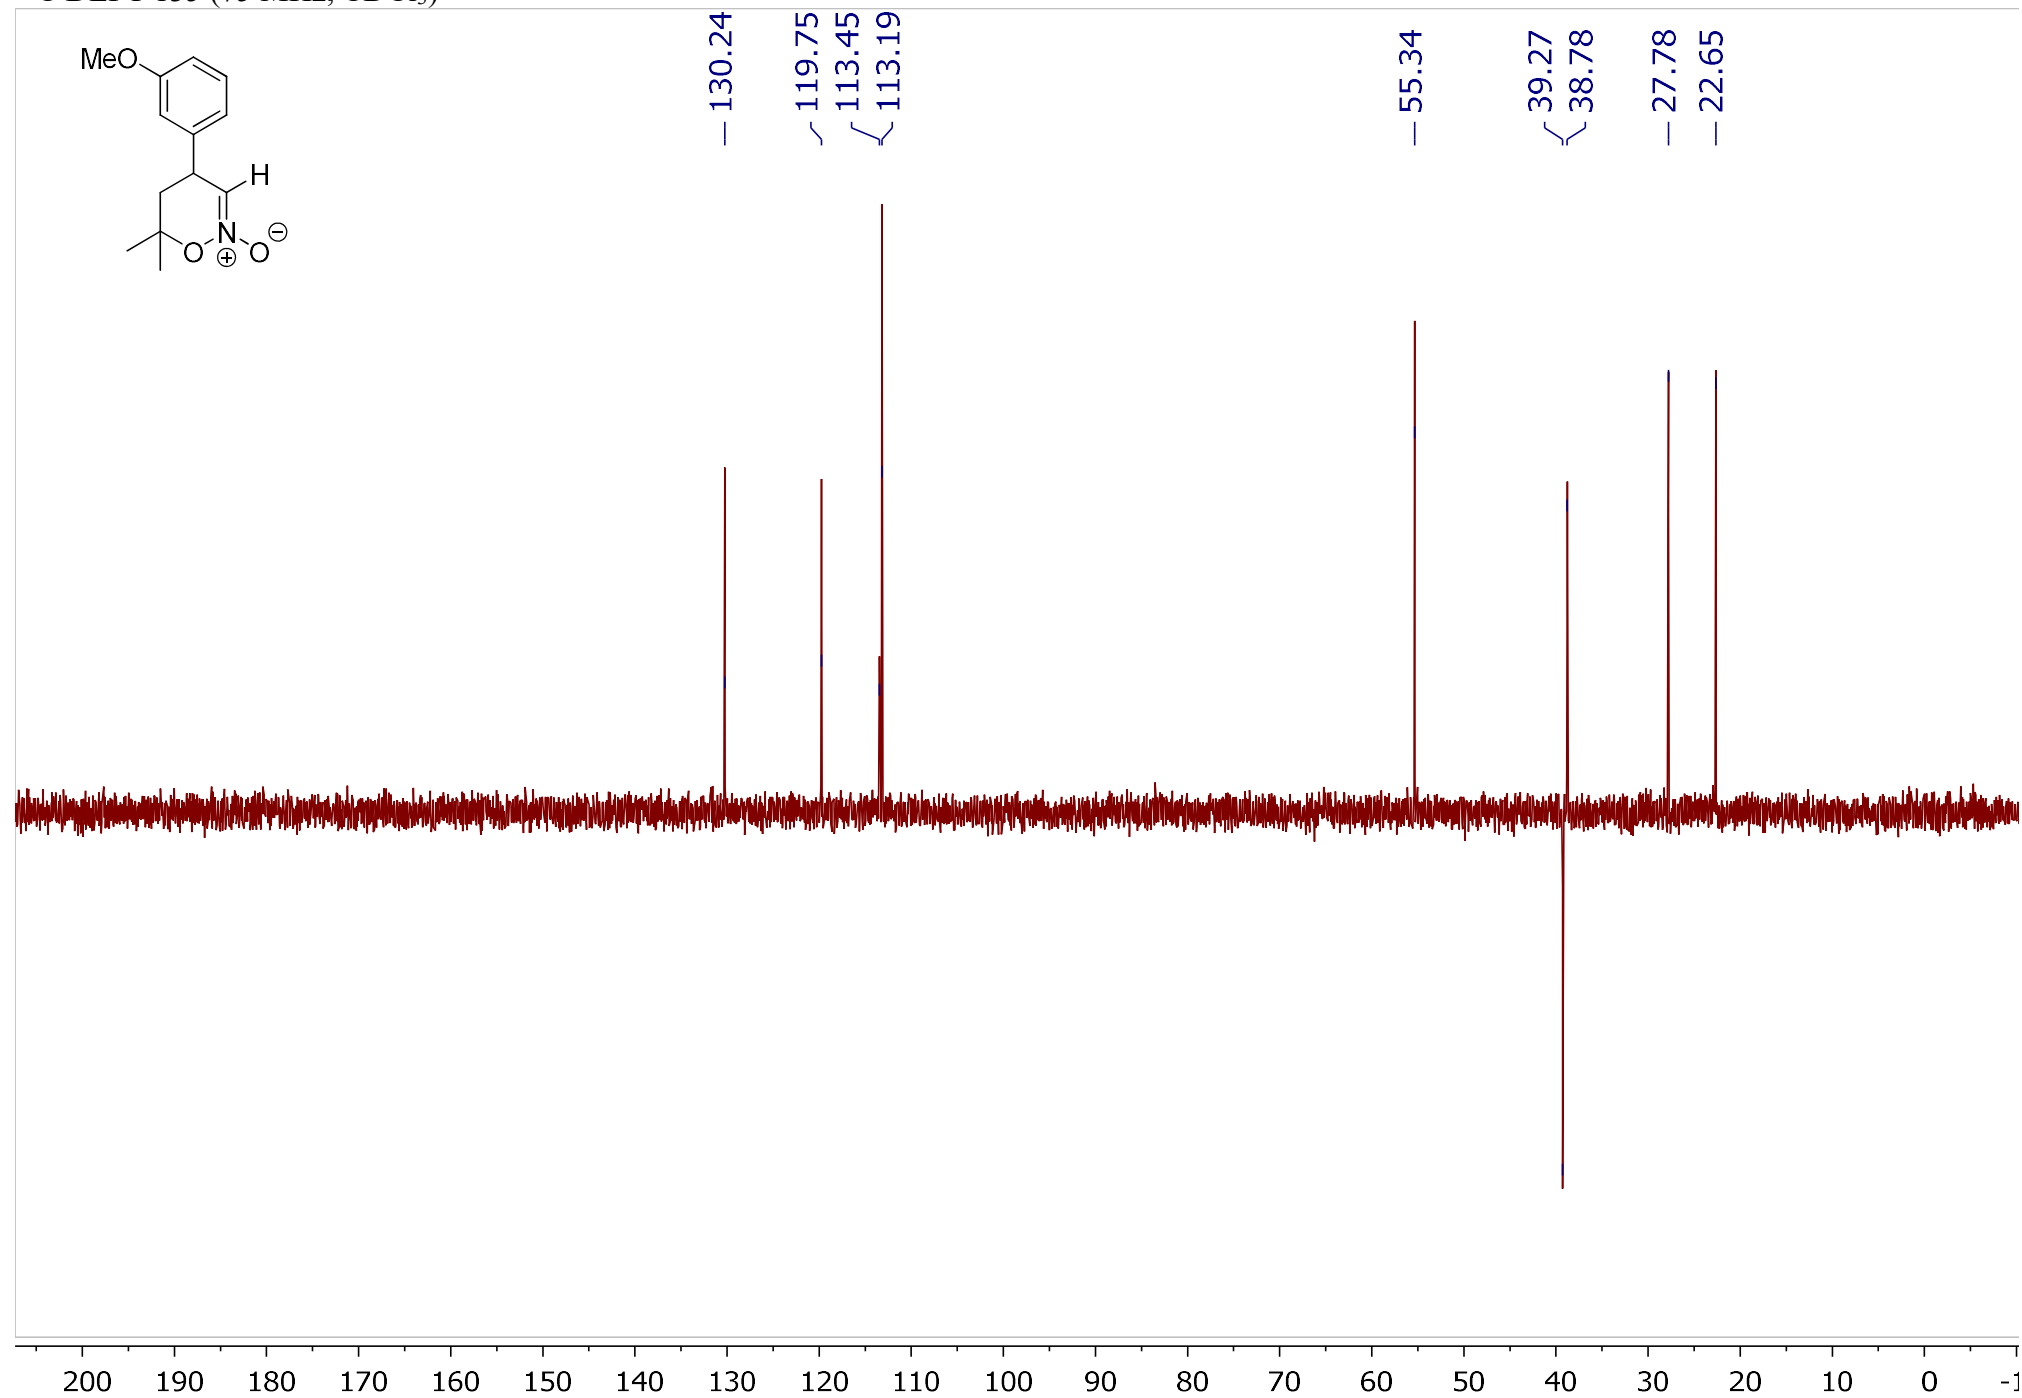

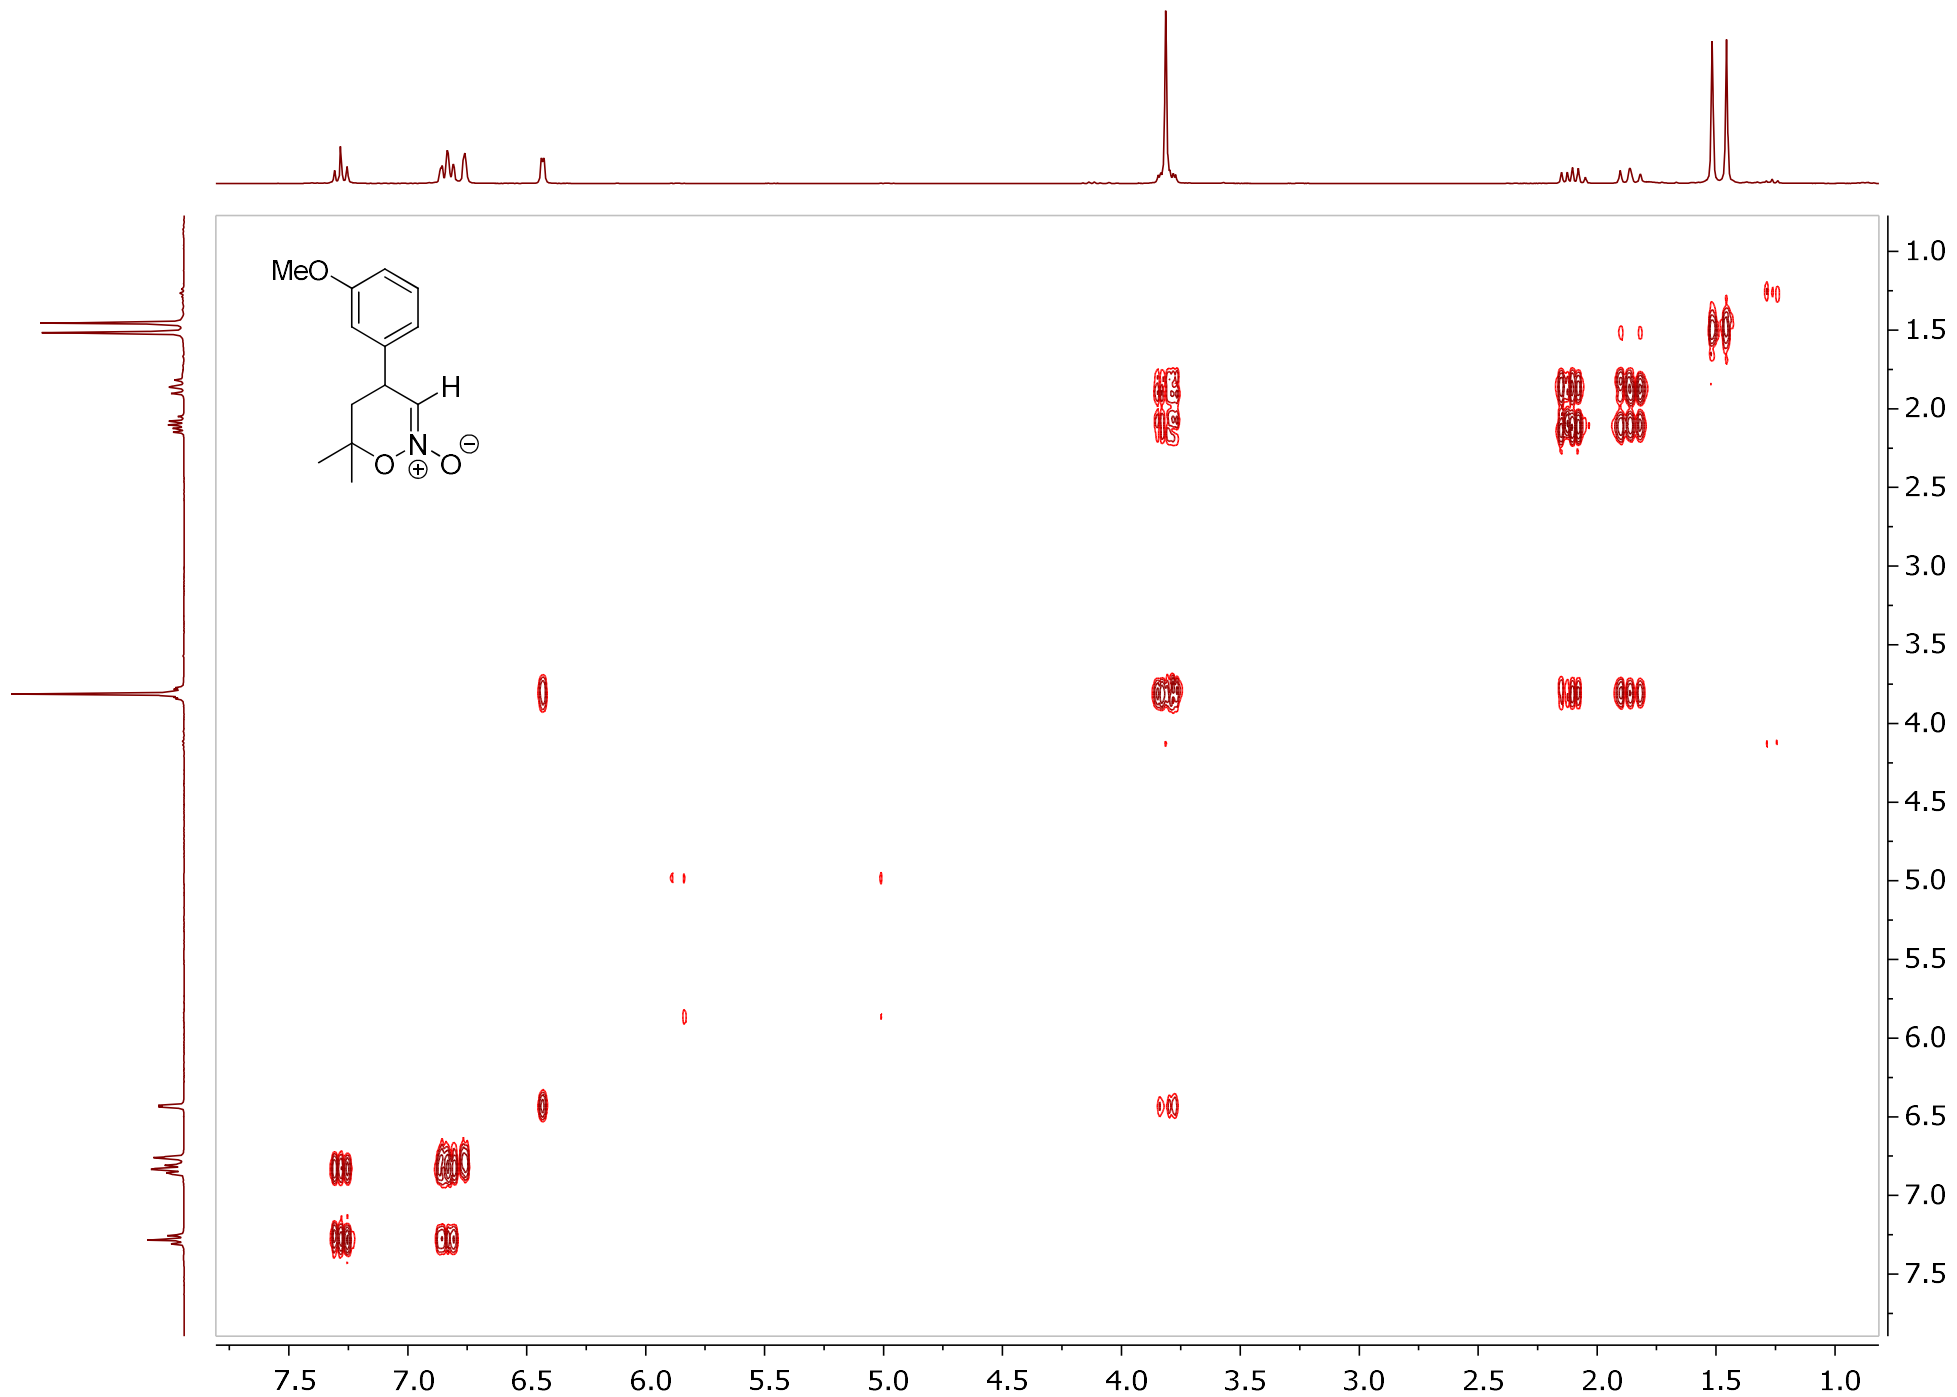

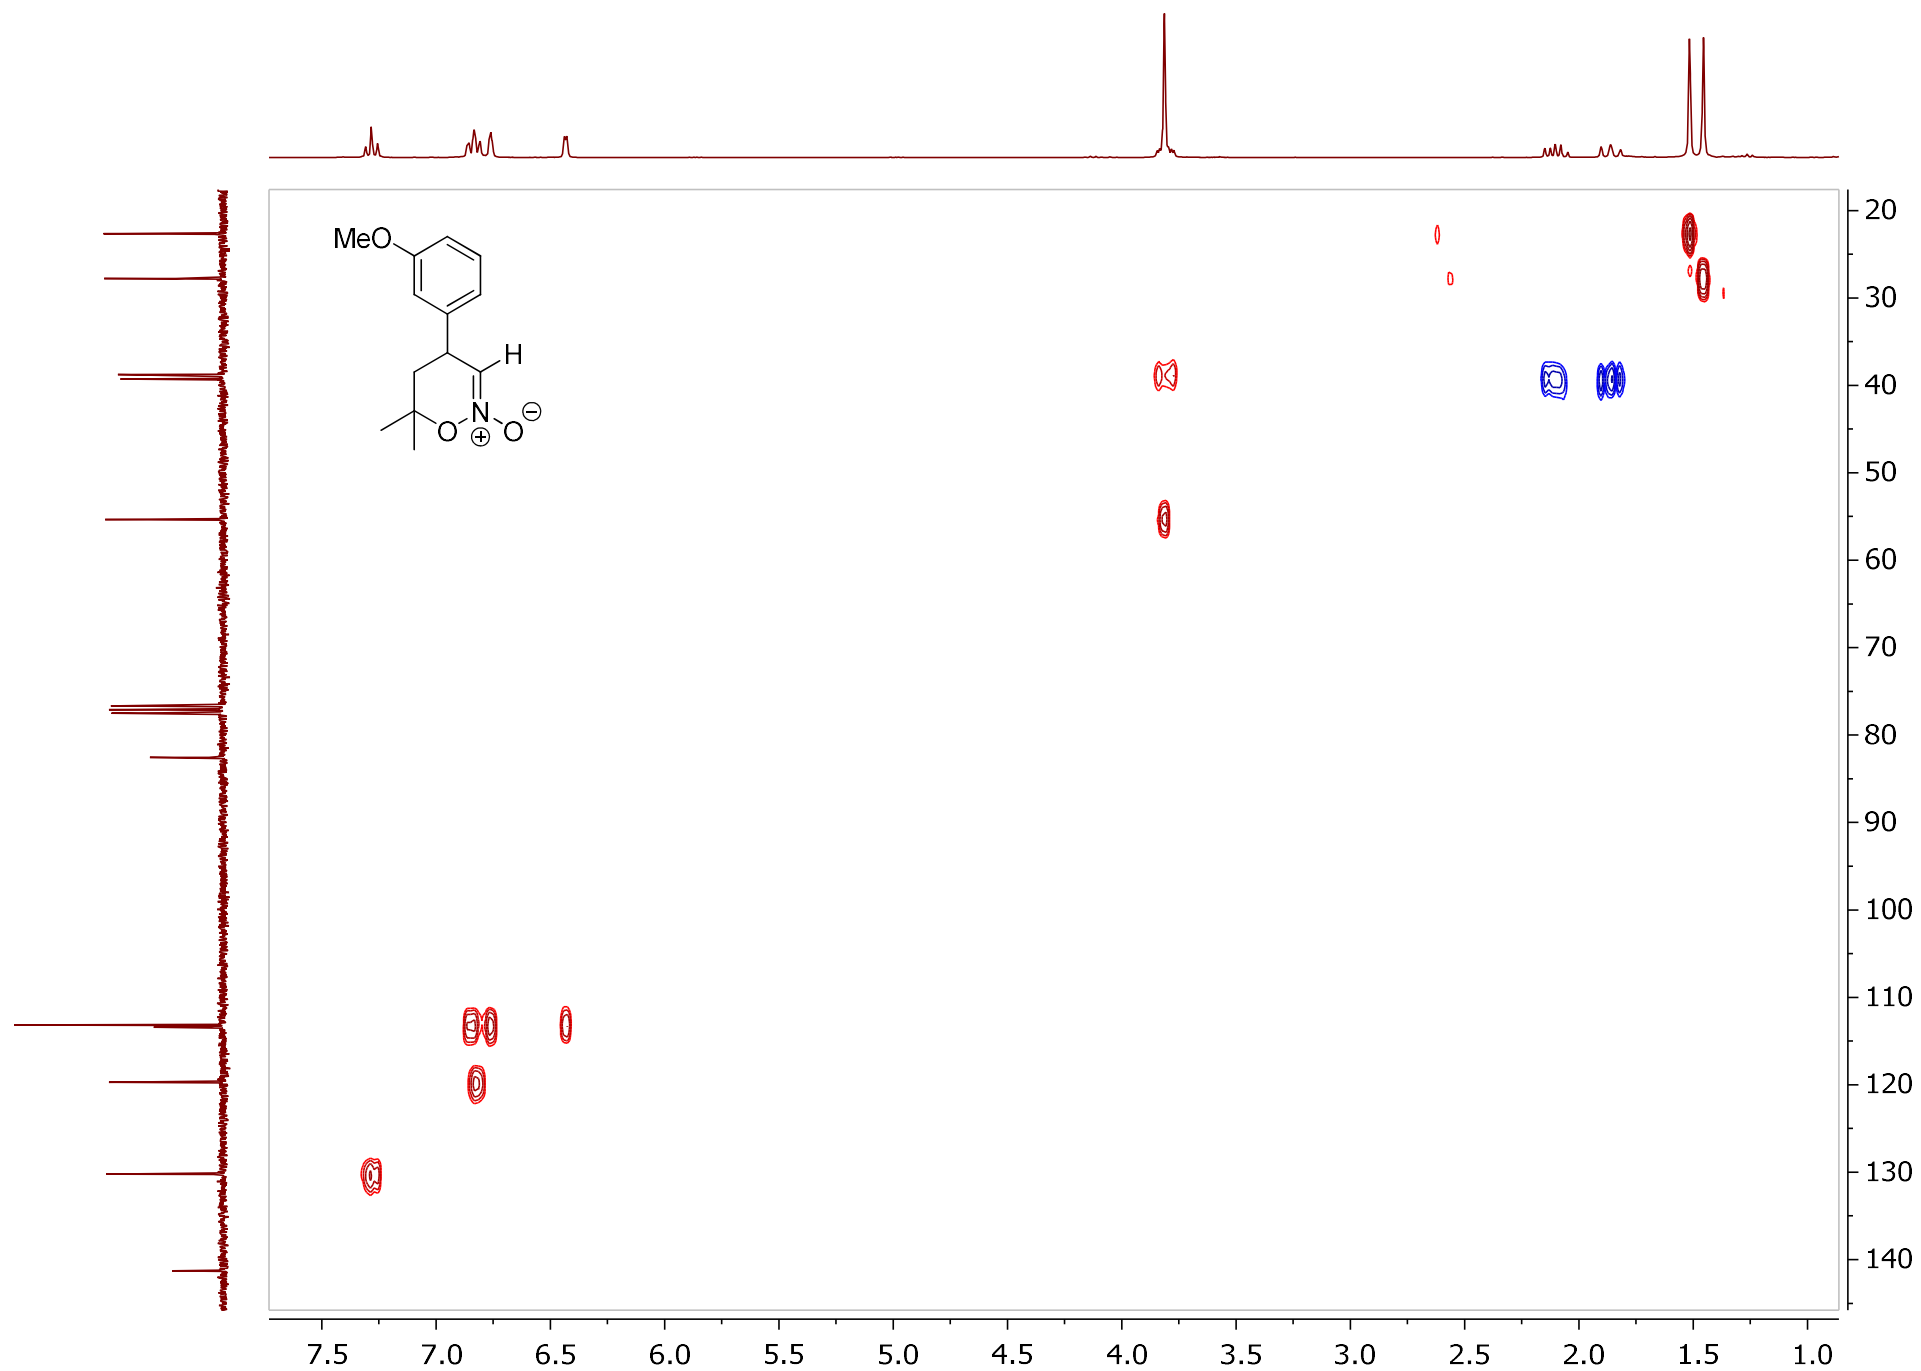

**4-(2-Chlorophenyl)-6,6-dimethyl-5,6-dihydro-4H-1,2-oxazine 2-oxide 1e**

<sup>1</sup>H NMR (300 MHz, CDCl<sub>3</sub>)

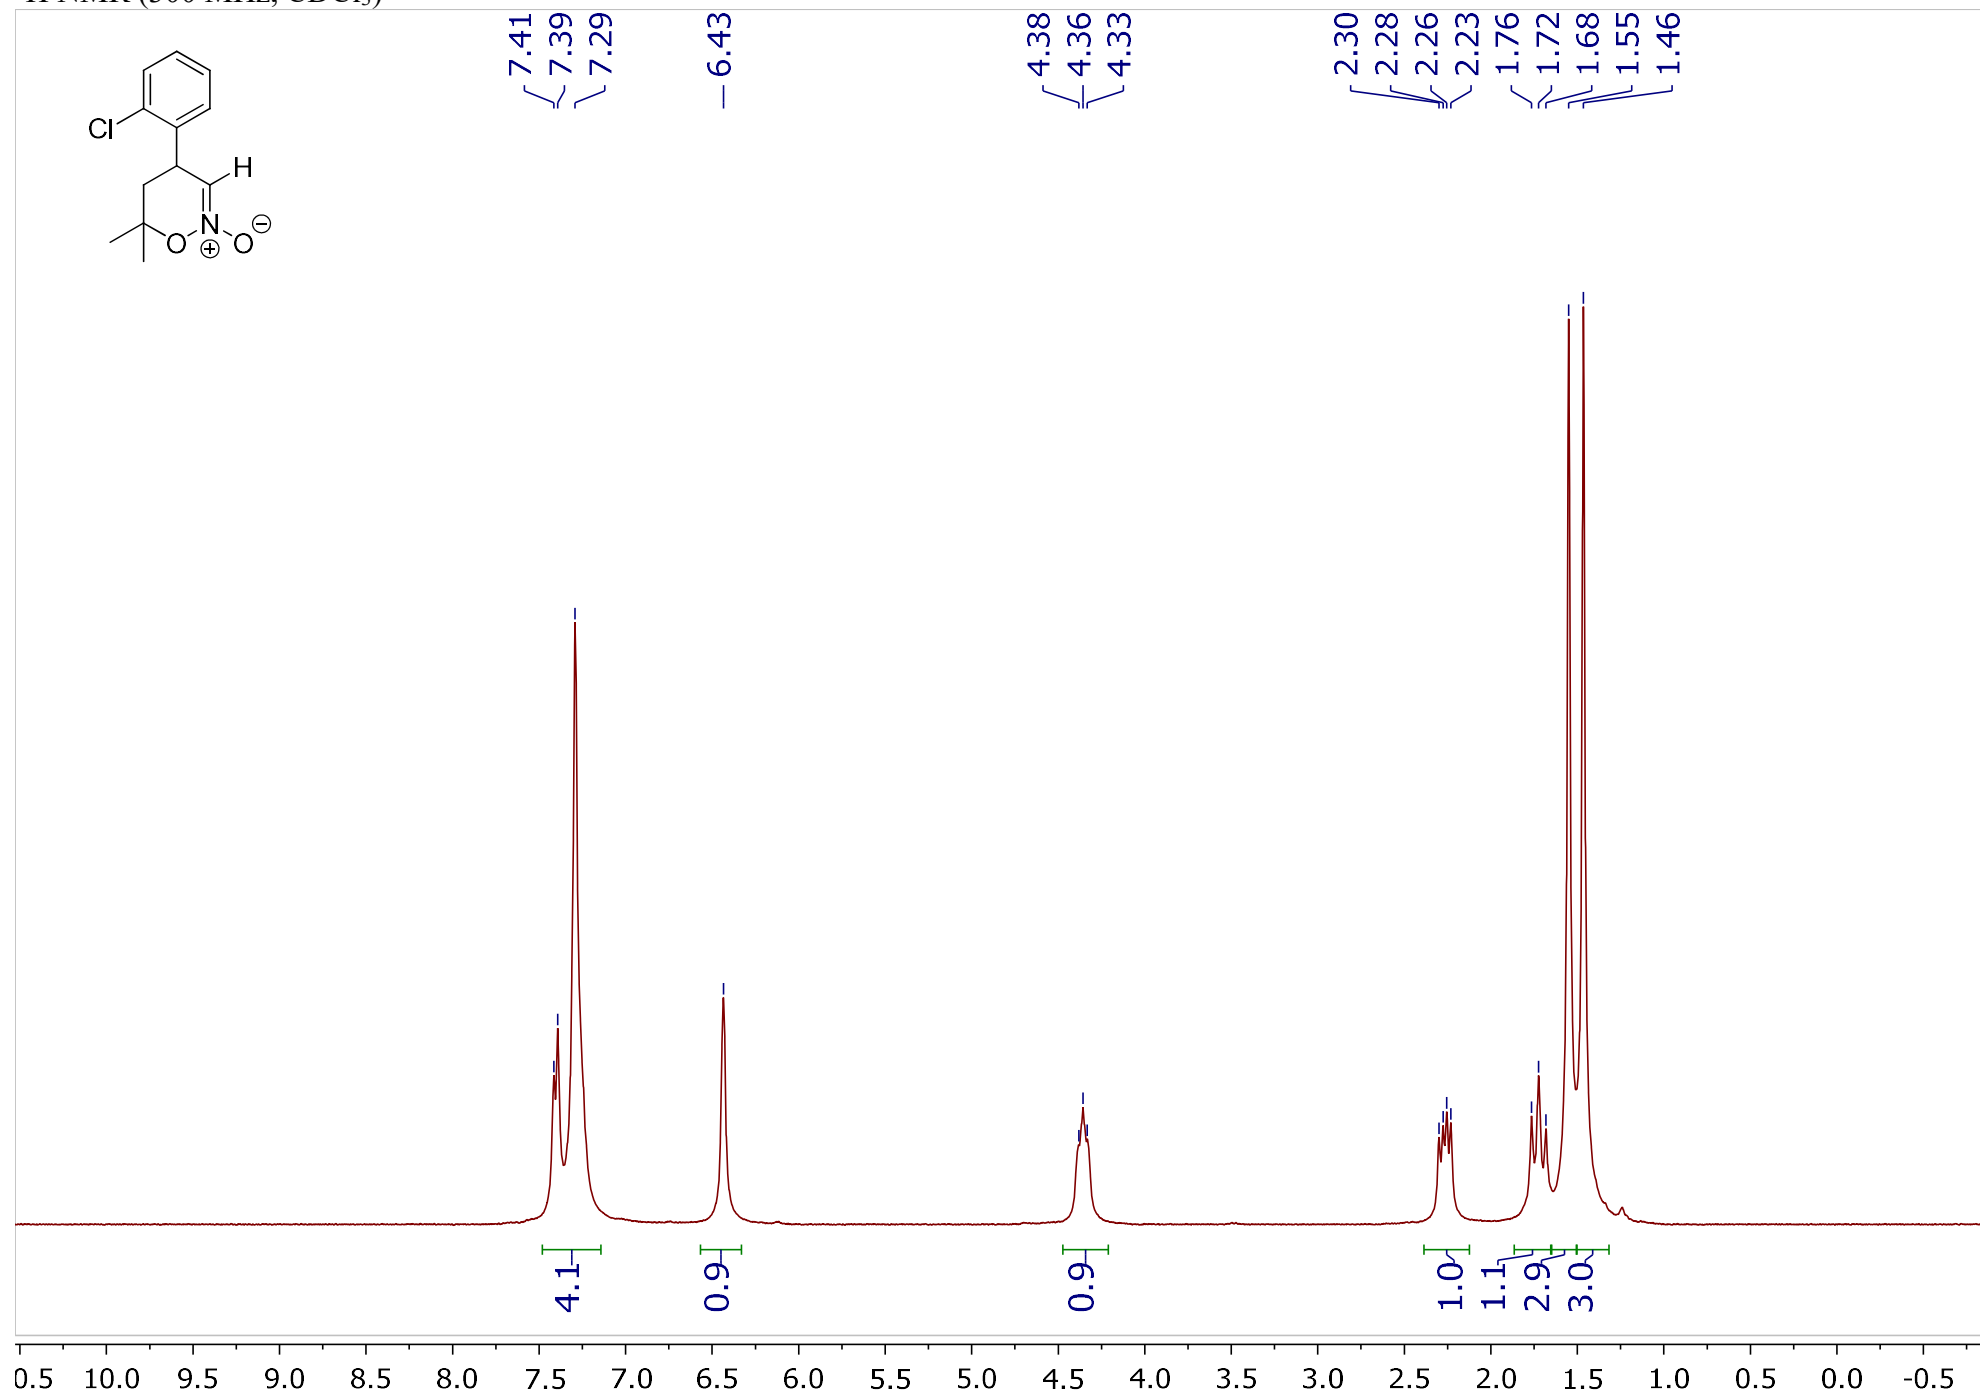

$^{13}\text{C}$  NMR (75 MHz,  $\text{CDCl}_3$ )

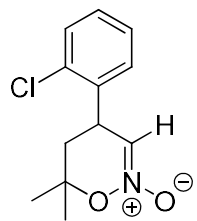

137.33  
133.24  
130.07  
129.08  
128.76  
127.86

112.71

82.76

36.97  
35.66  
27.74  
22.53

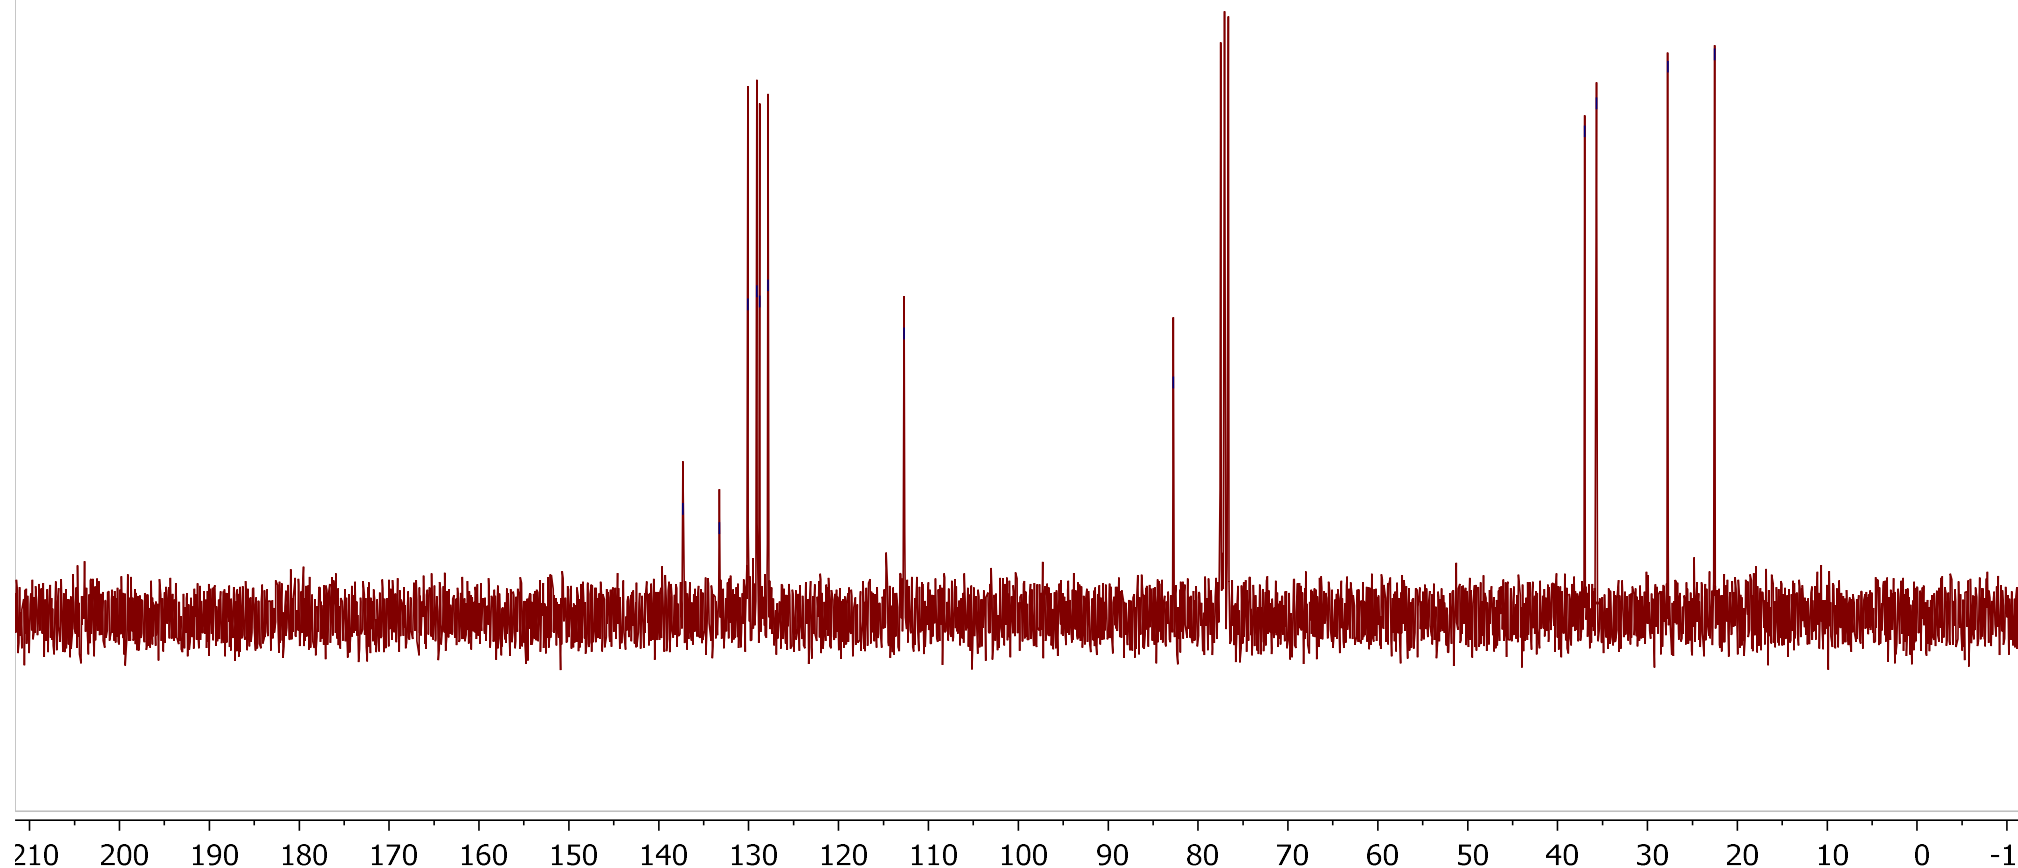



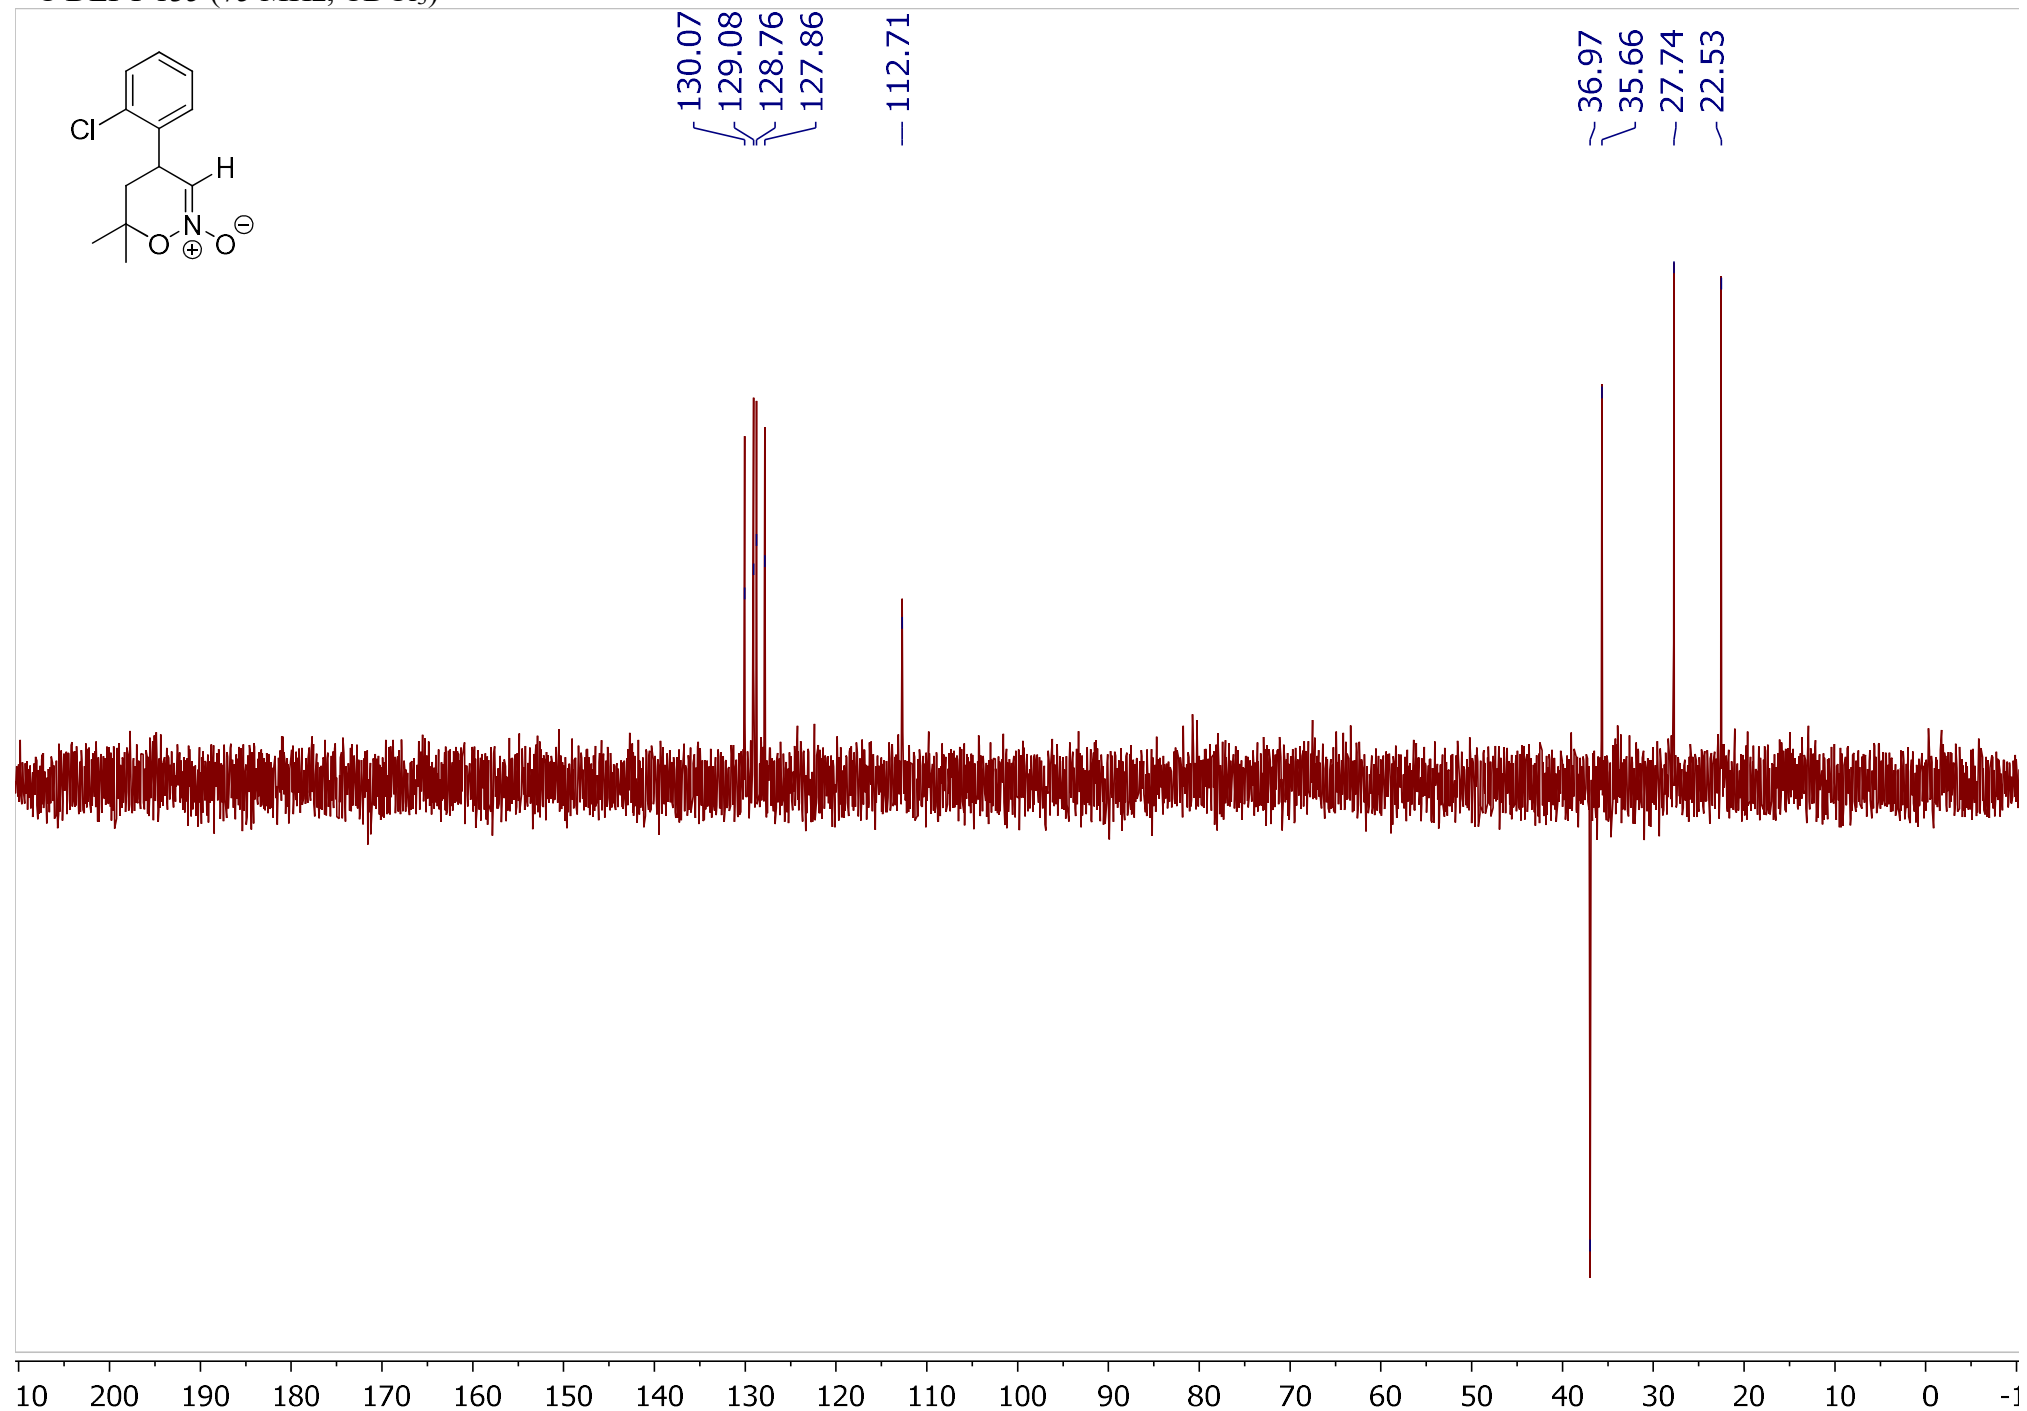

**4-(3-(Cyclopentyloxy)-4-methoxyphenyl)-6,6-dimethyl-5,6-dihydro-4H-1,2-oxazine 2-oxide 1f**

$^1\text{H}$  NMR (300 MHz,  $\text{CDCl}_3$ )

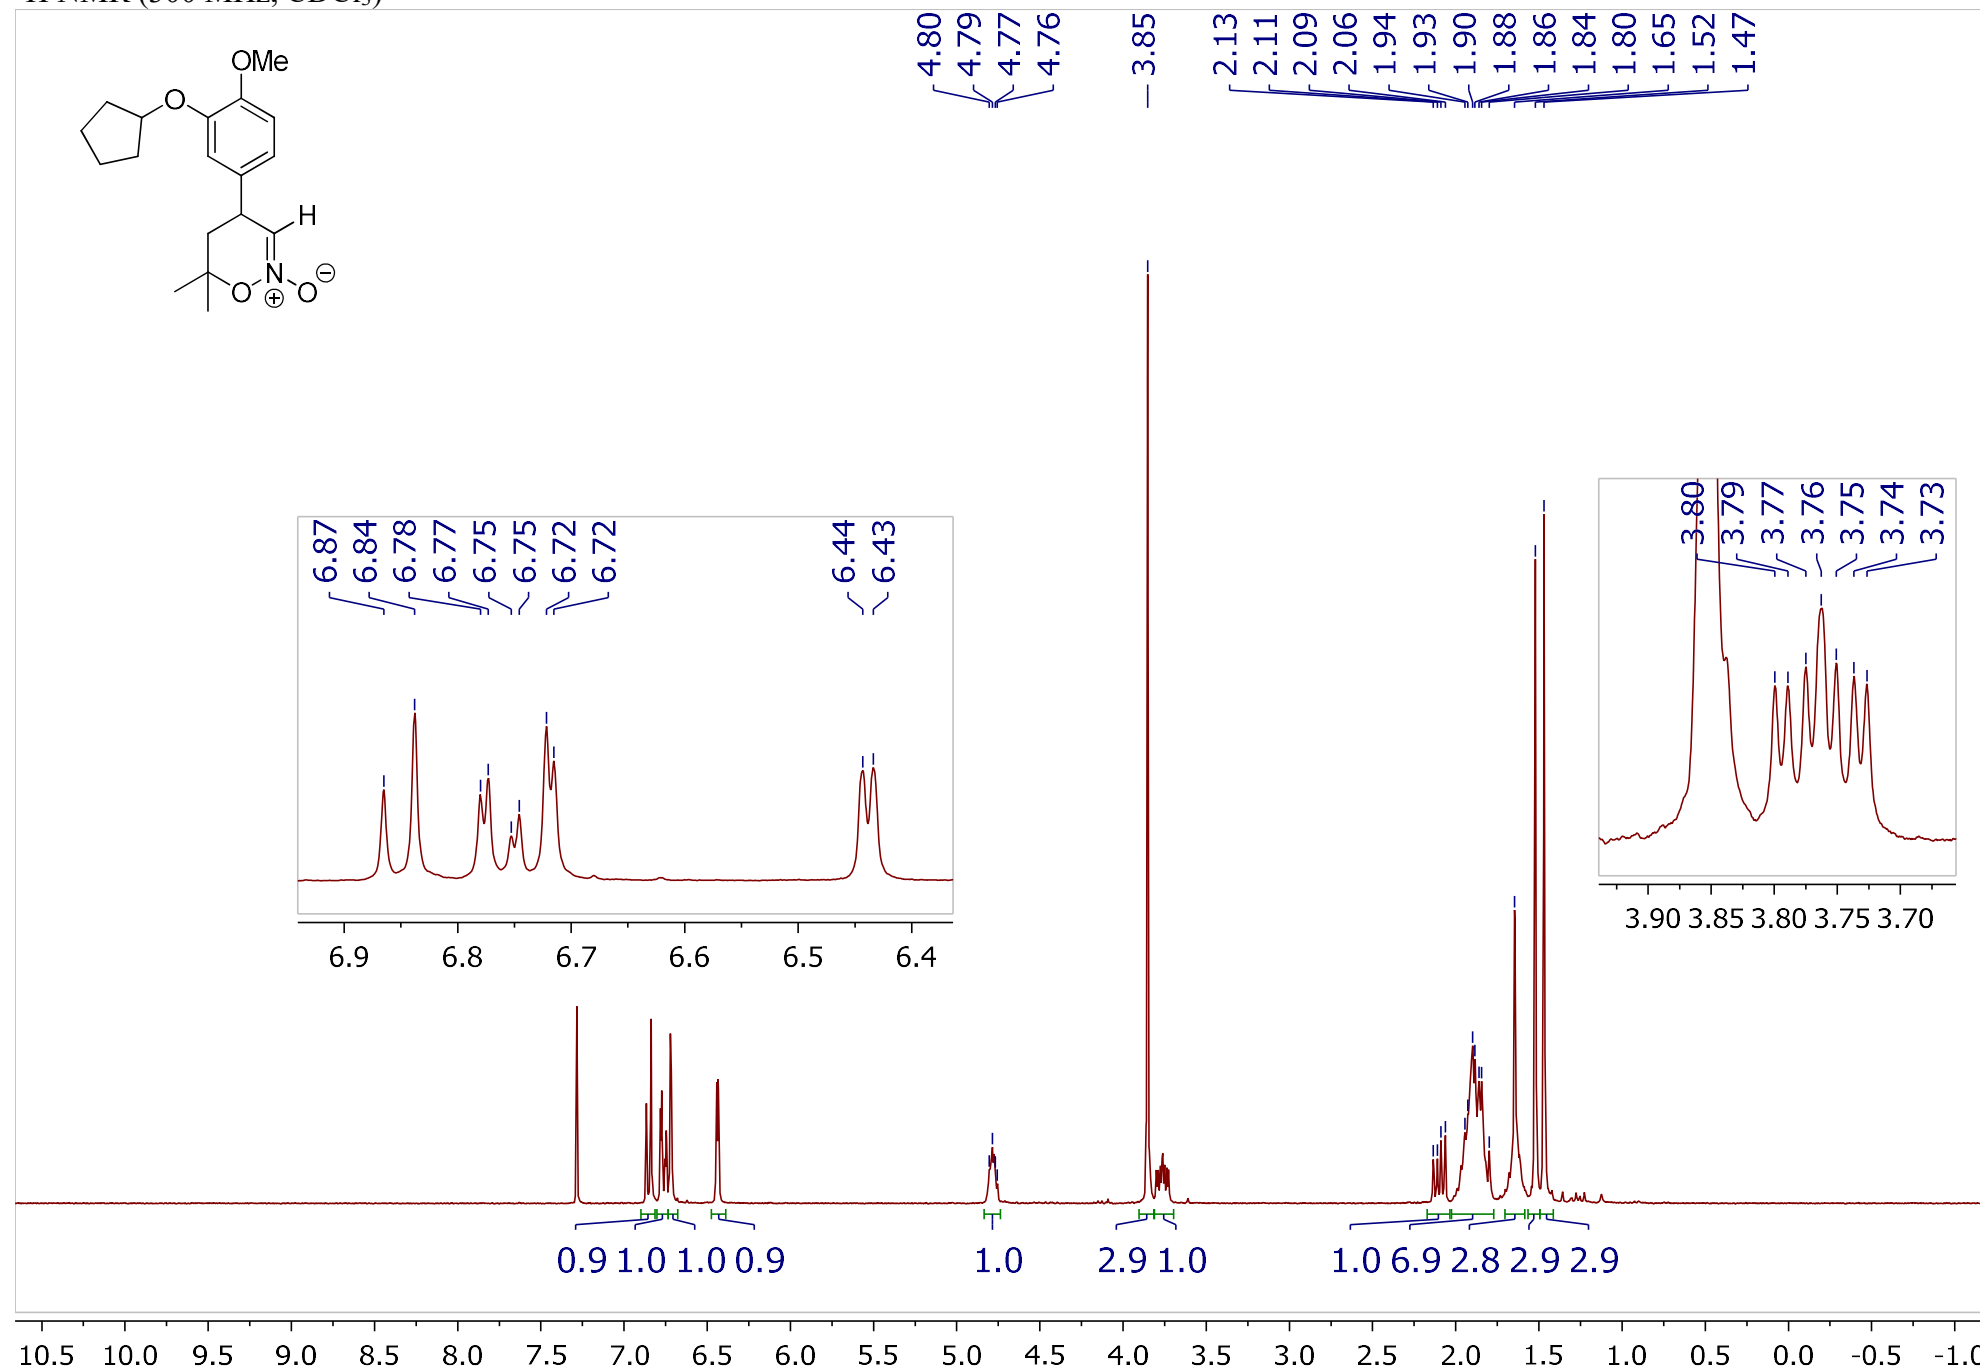

<sup>13</sup>C NMR (75 MHz, CDCl<sub>3</sub>)

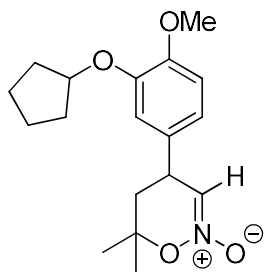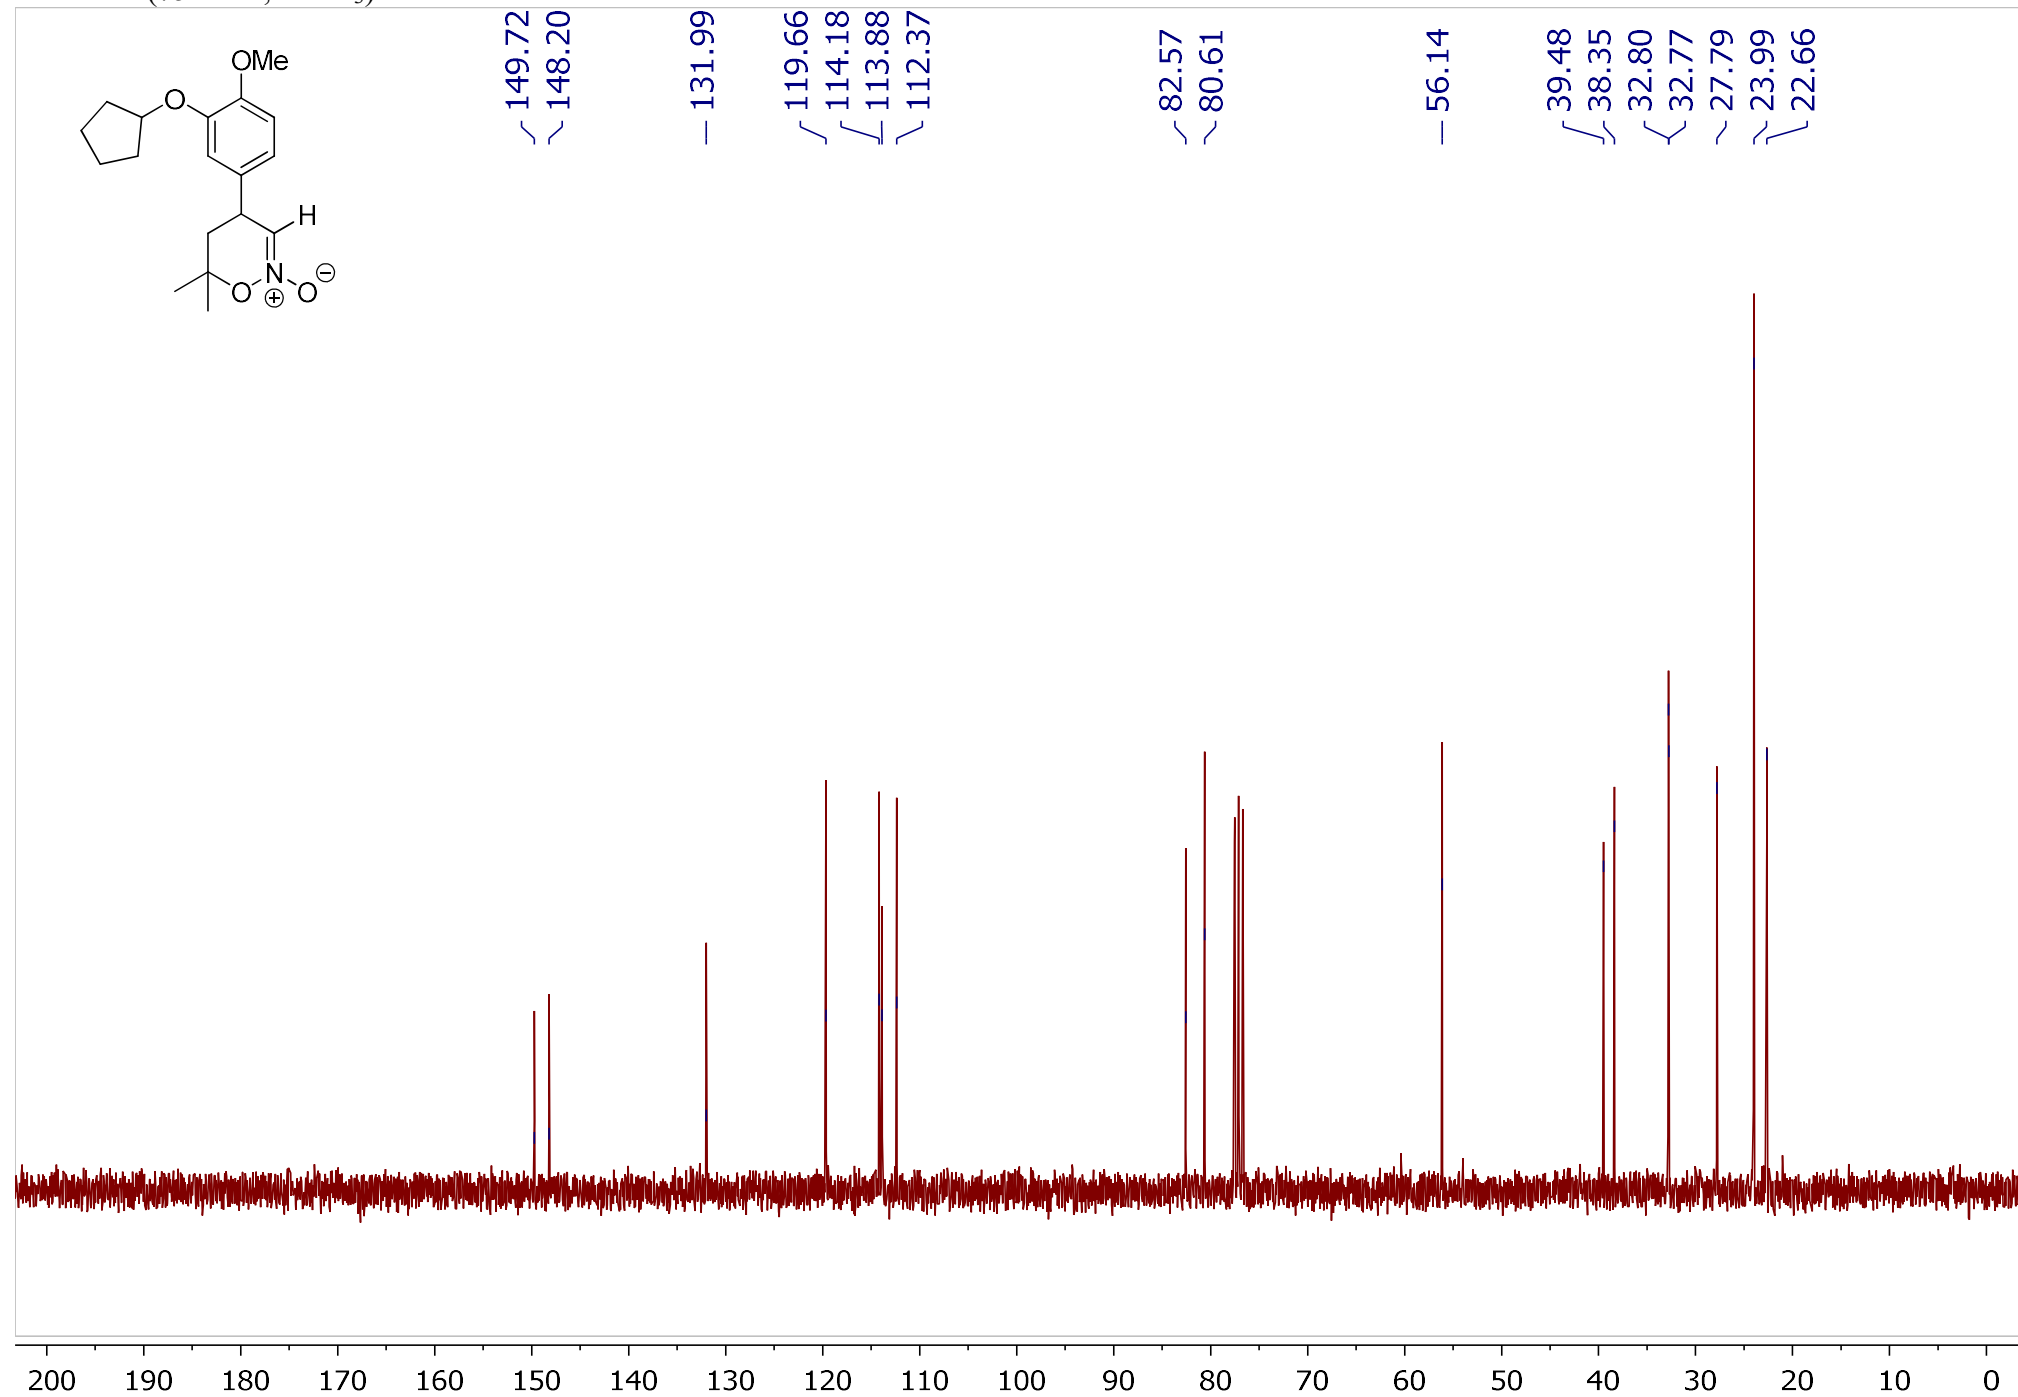

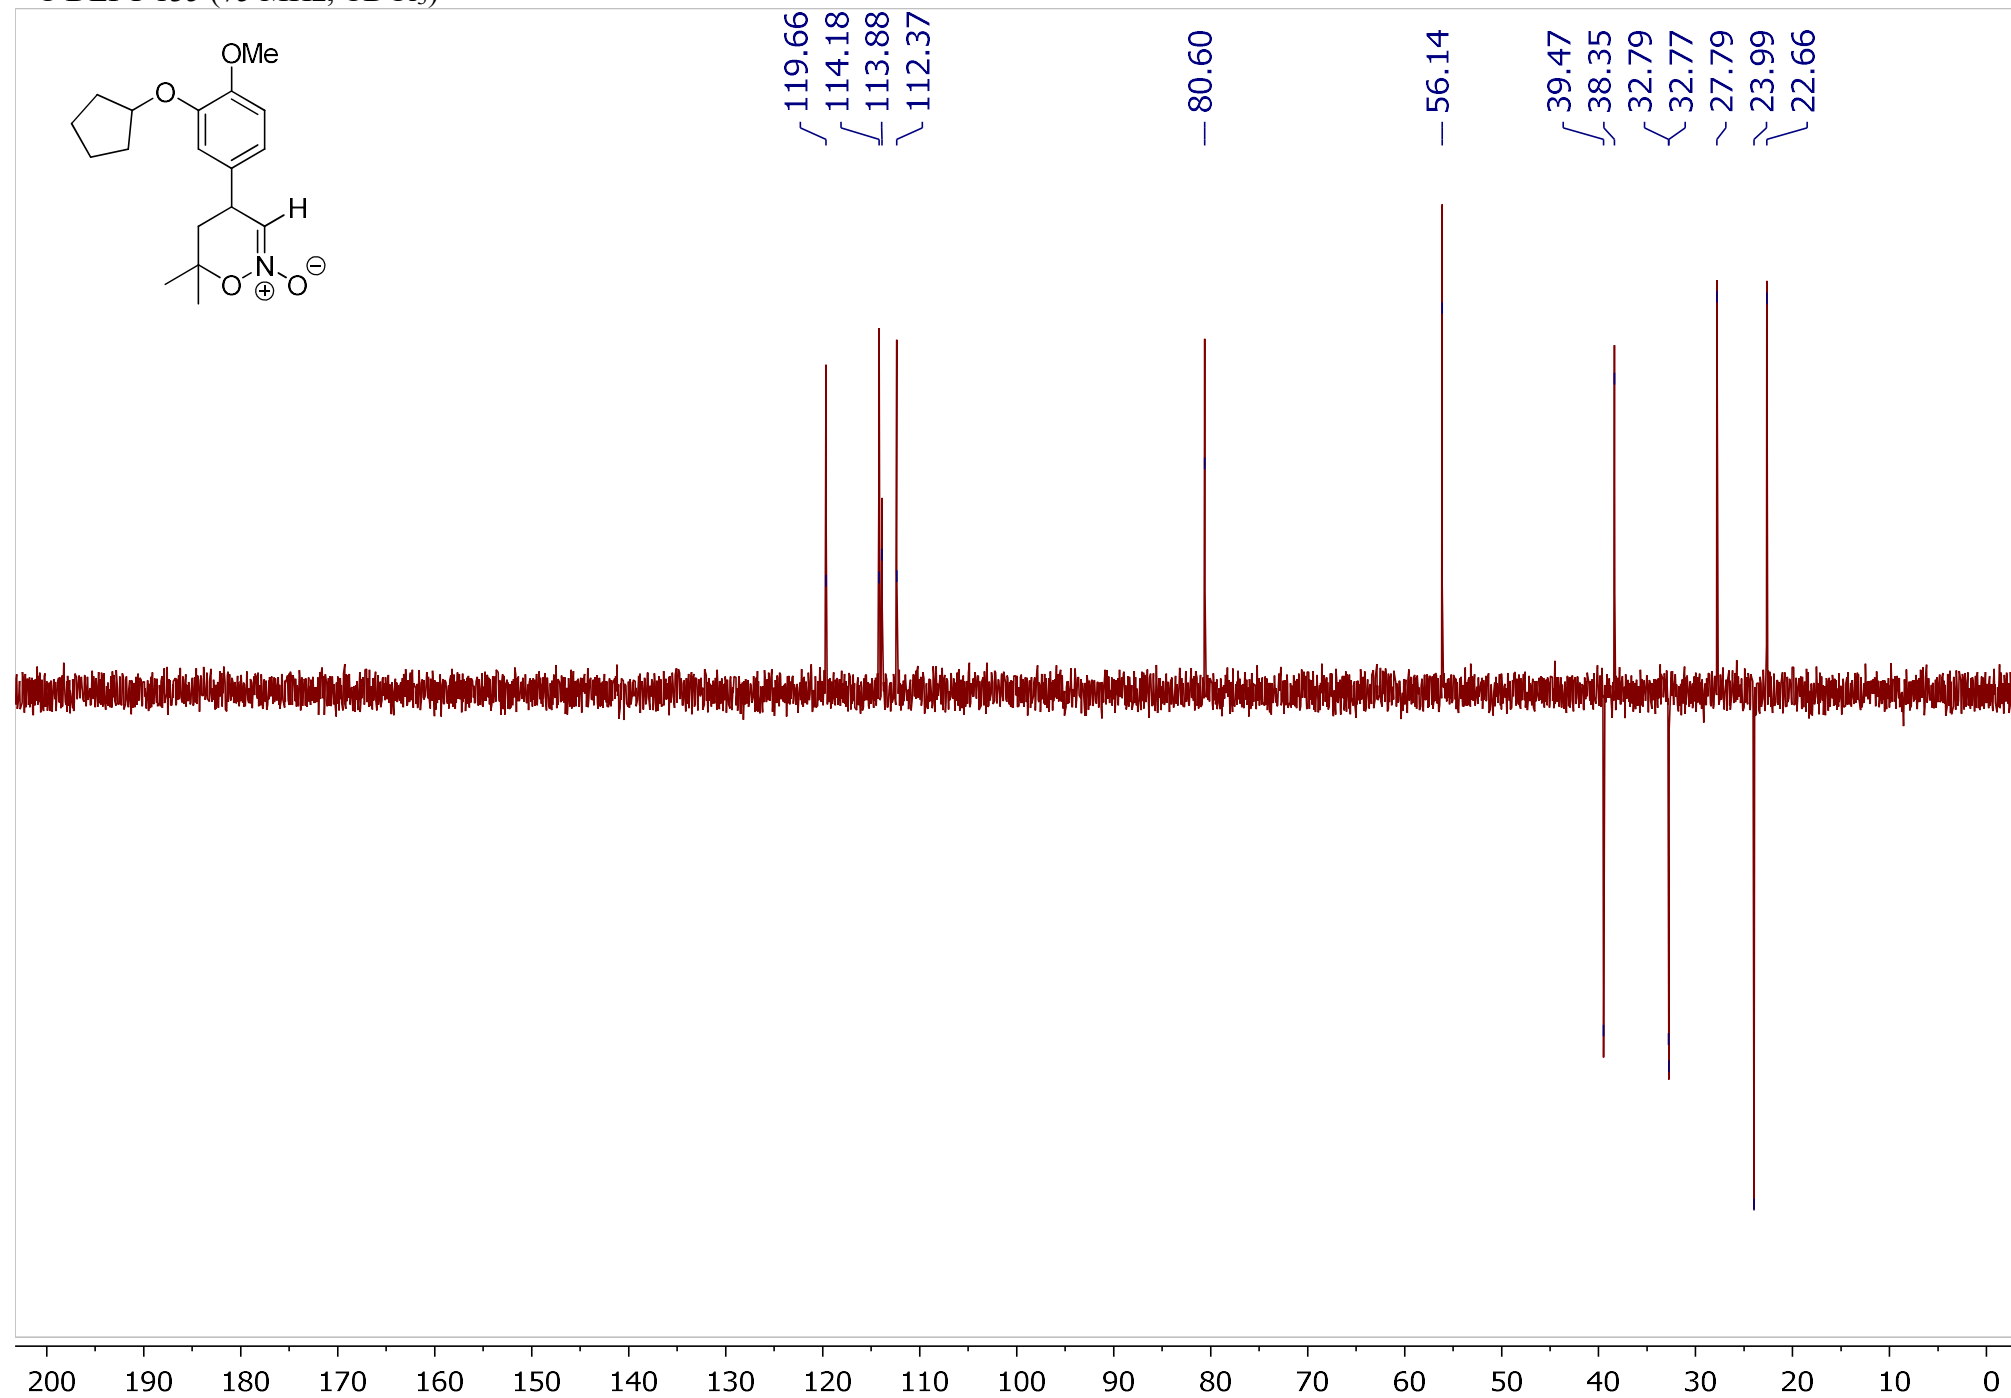

**(4S\*,4aR\*,8aR\*)-4-(4-Chlorophenyl)-4a,5,6,7,8,8a-hexahydro-4H-benzo[e][1,2]oxazine 2-oxide 1k**

<sup>1</sup>H NMR (300 MHz, CDCl<sub>3</sub>)

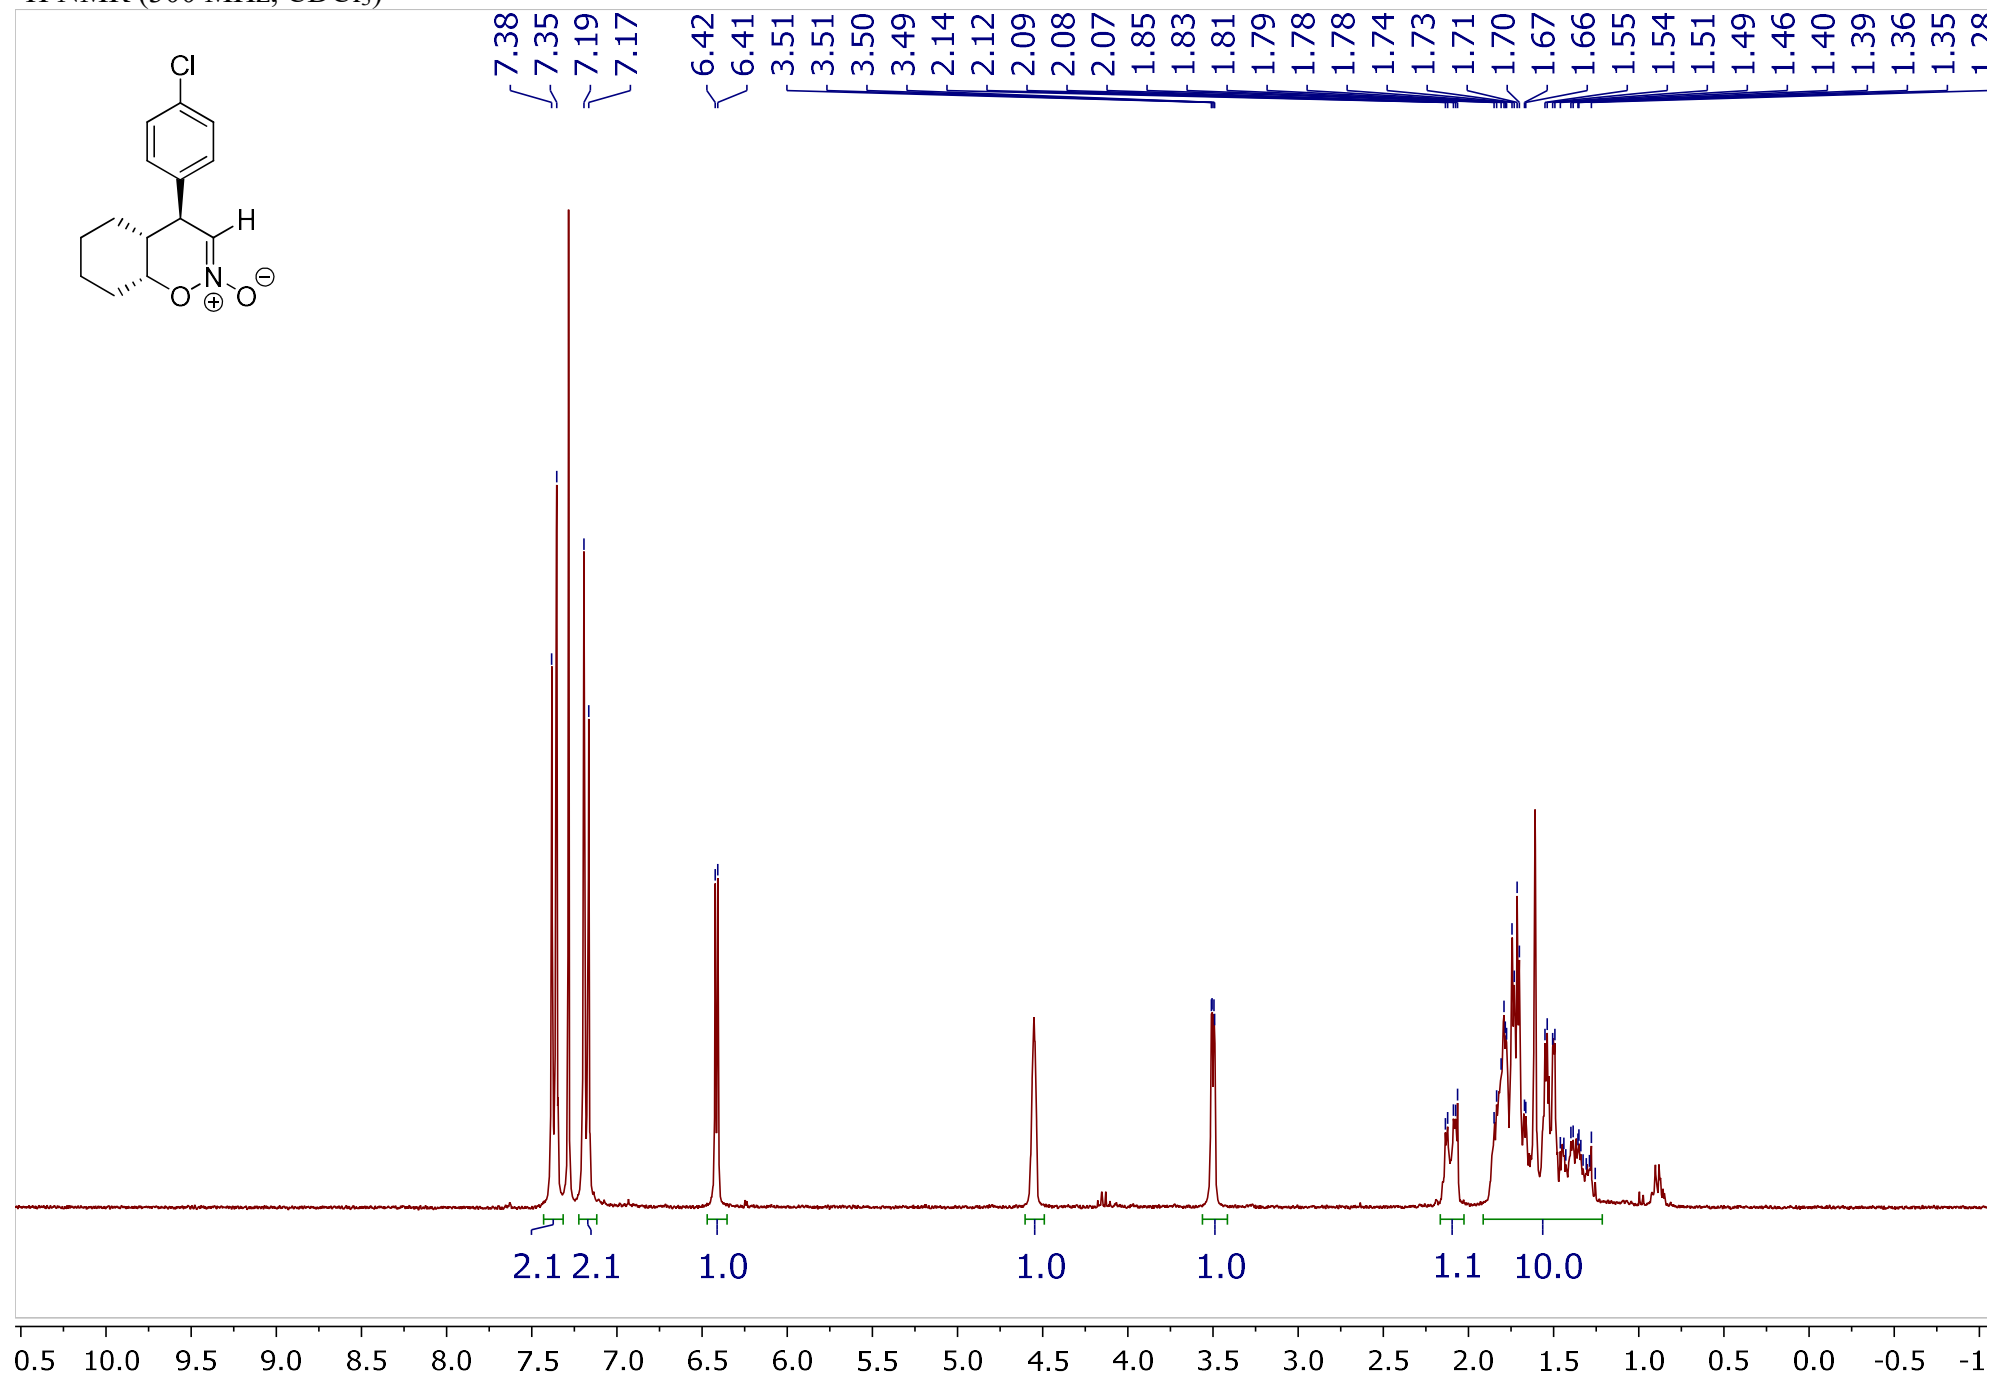

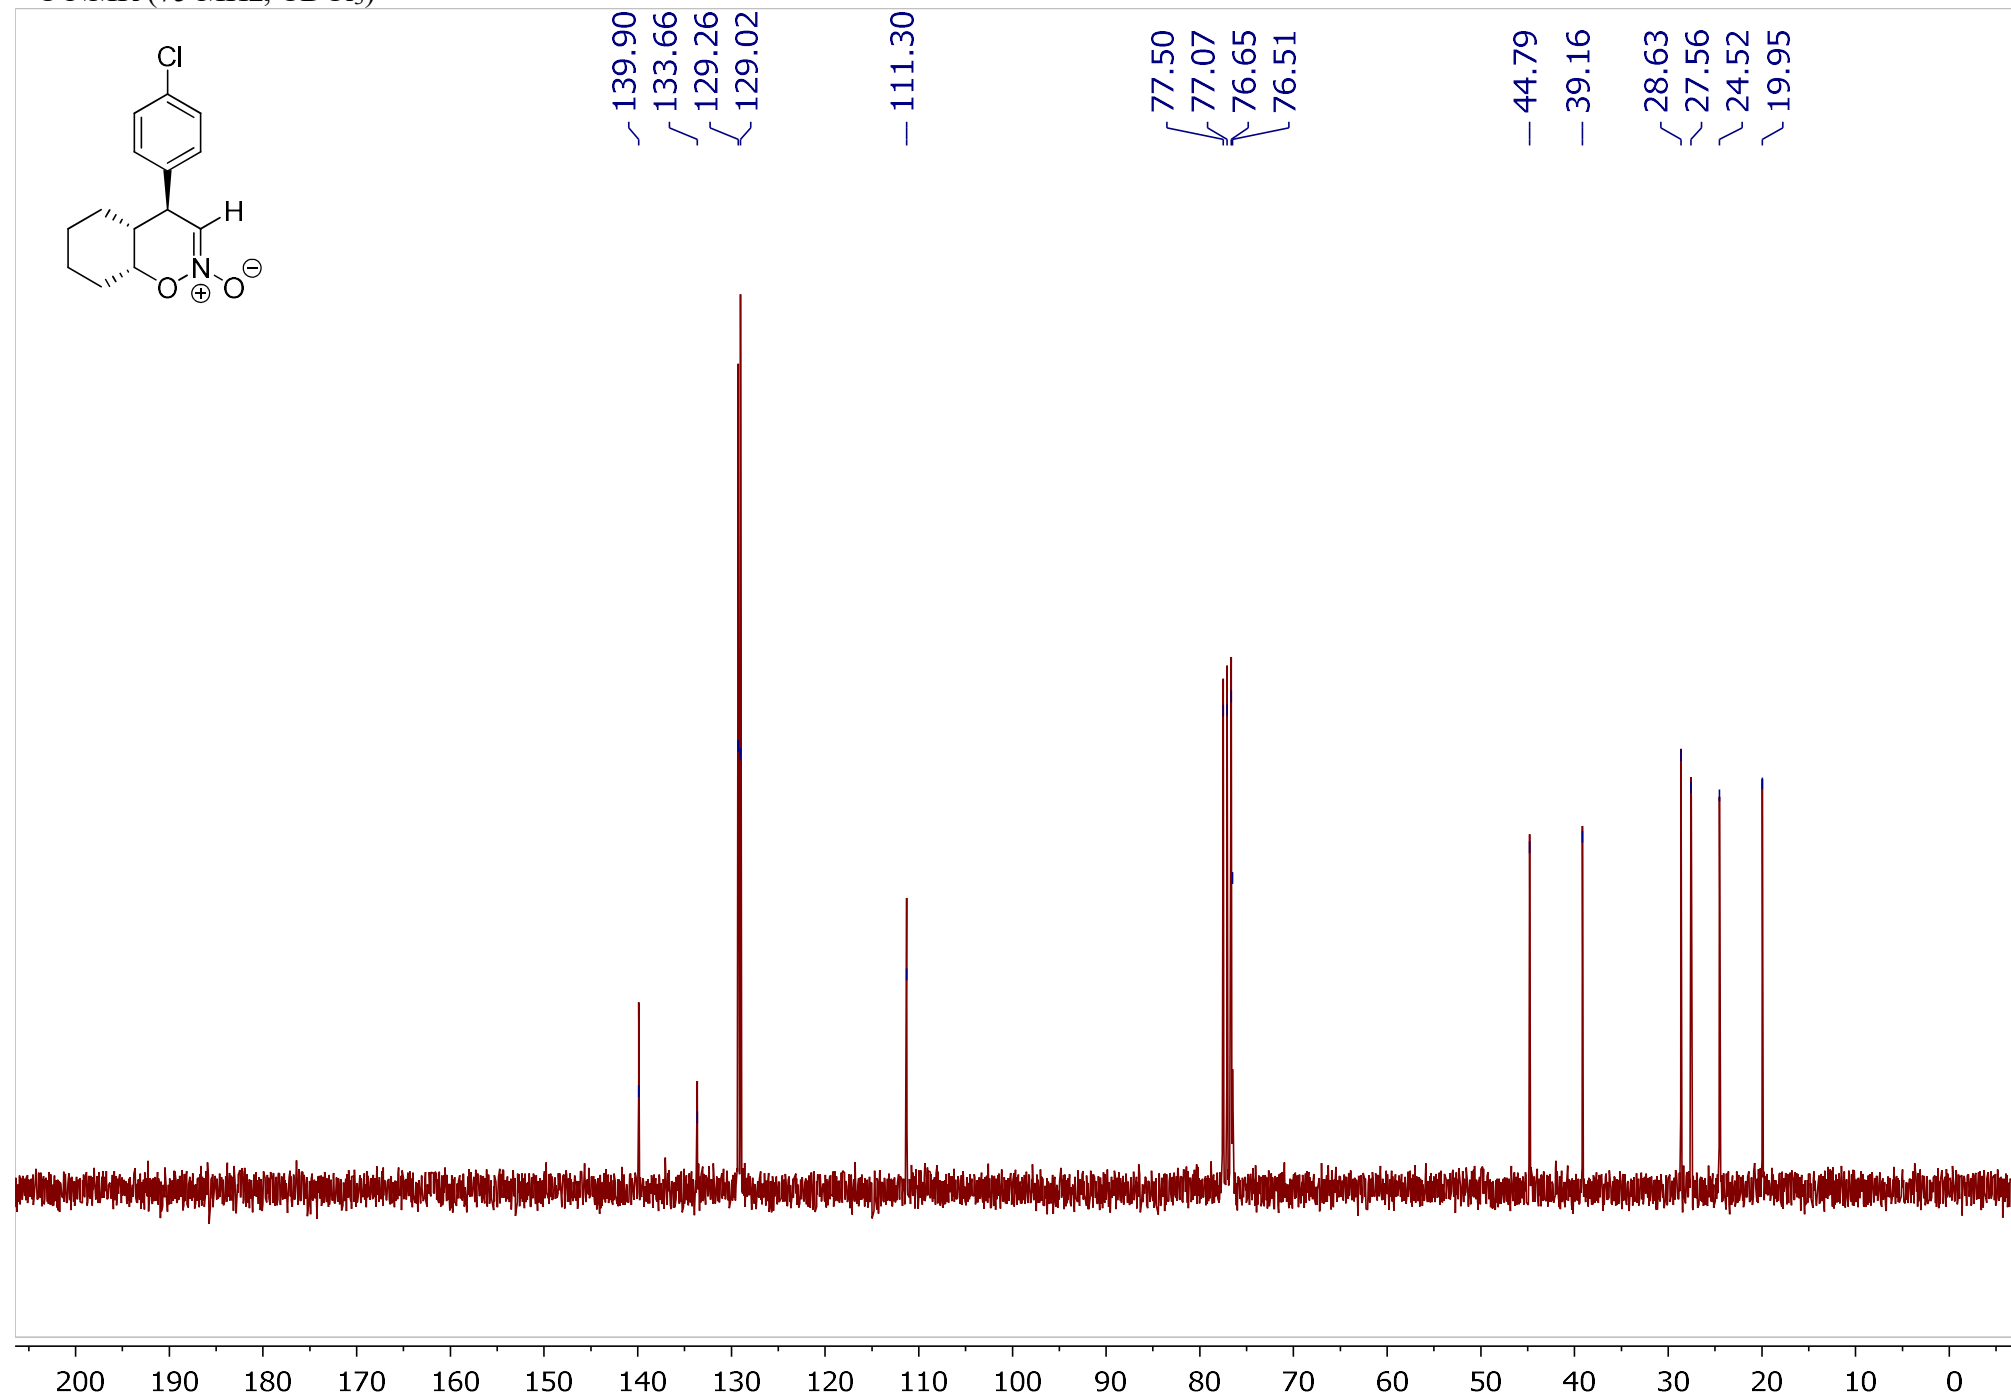

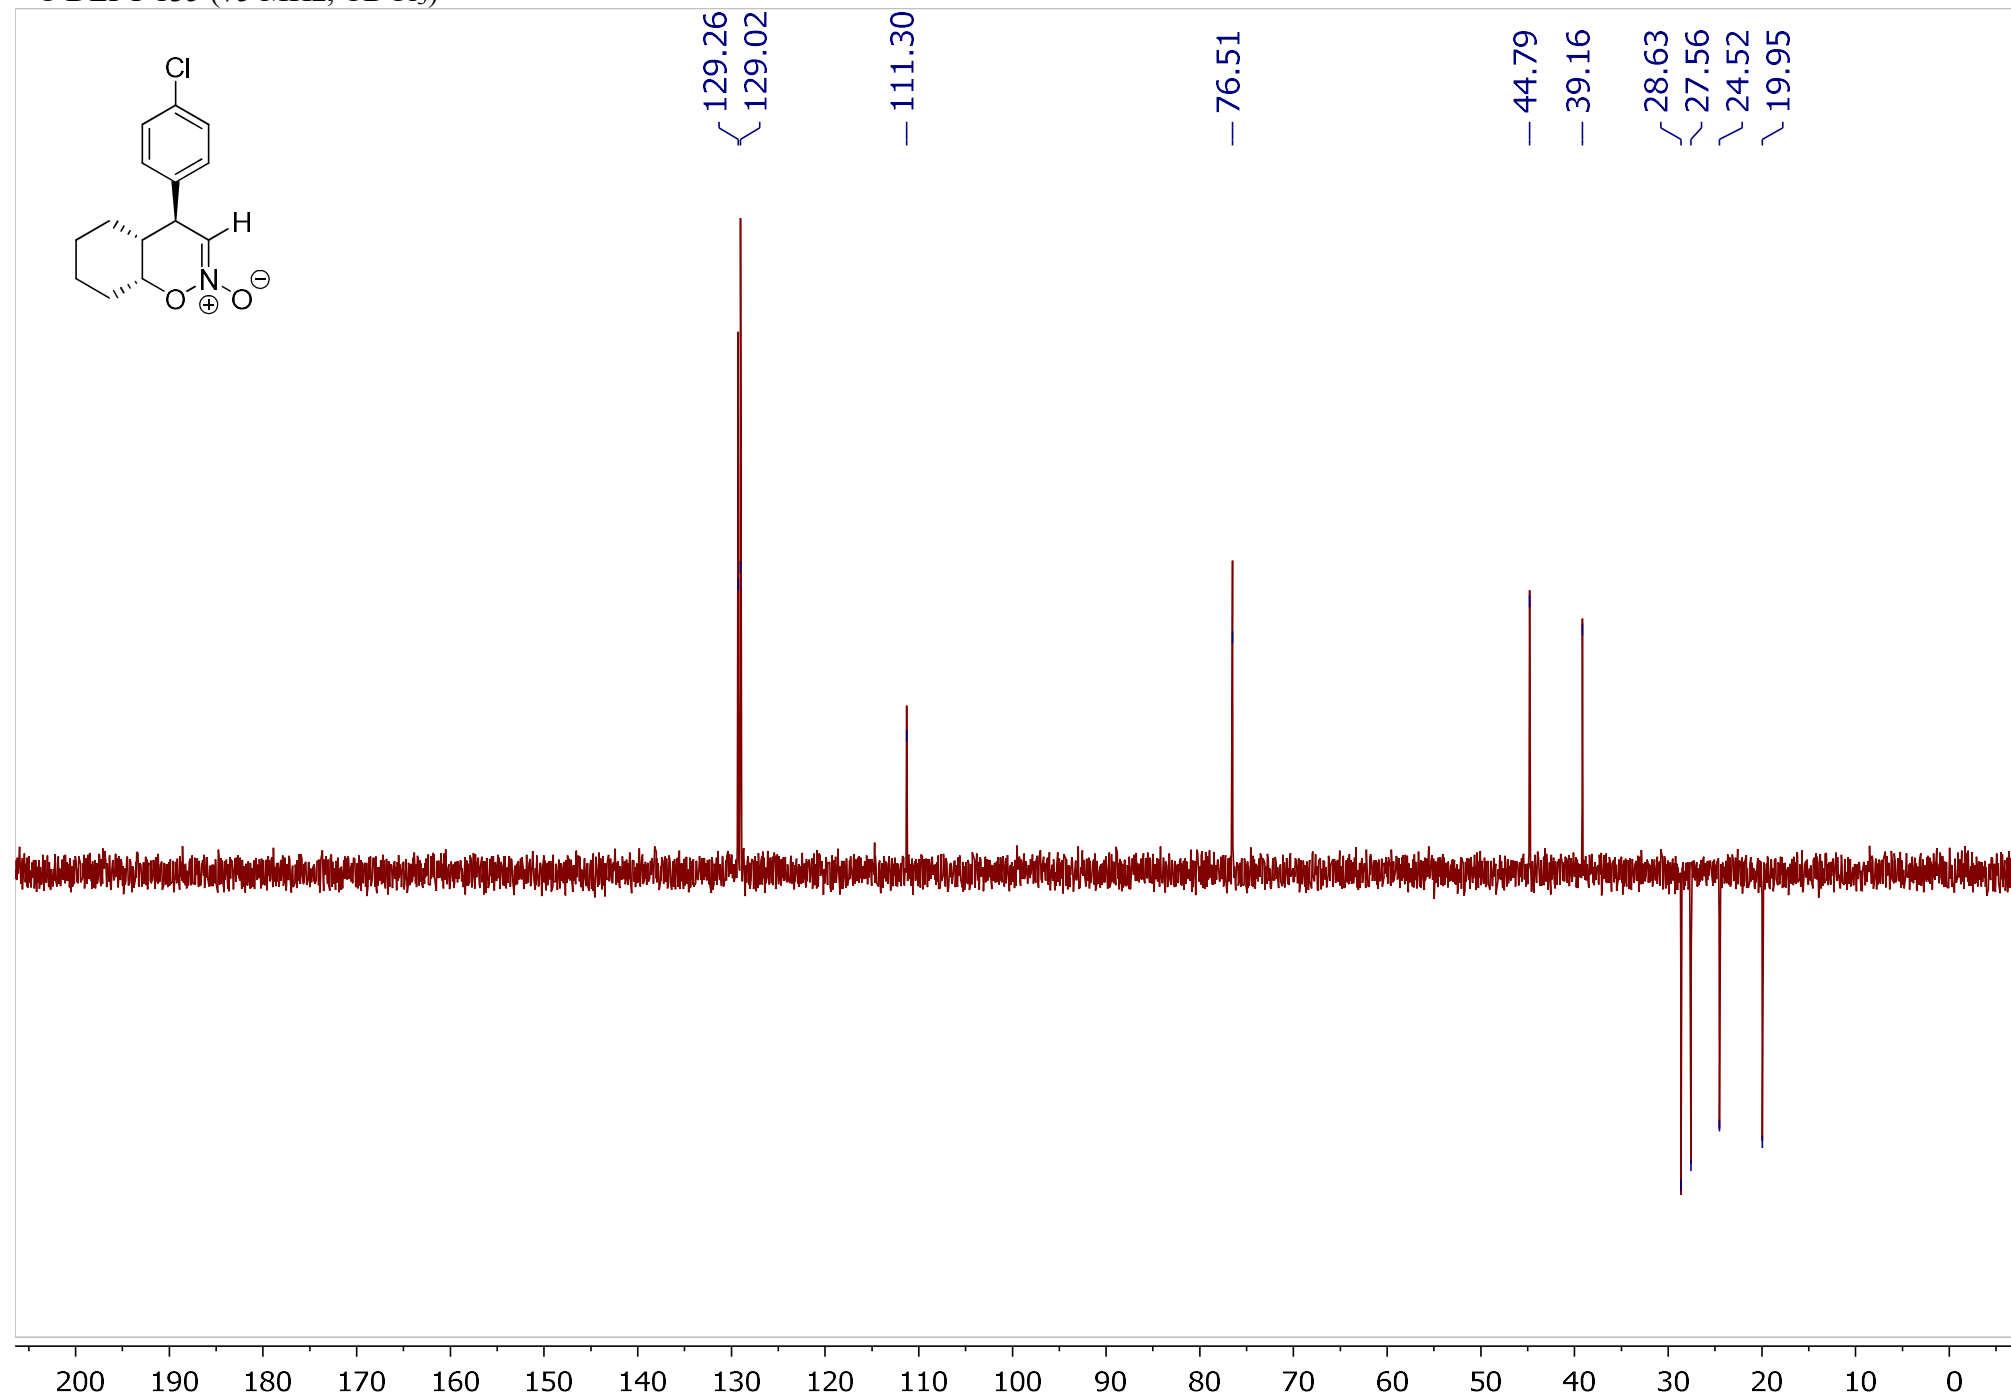

**2,2,2-Trichloroethyl 3-oxobutanoate**

$^1\text{H}$  NMR (300 MHz,  $\text{CDCl}_3$ )

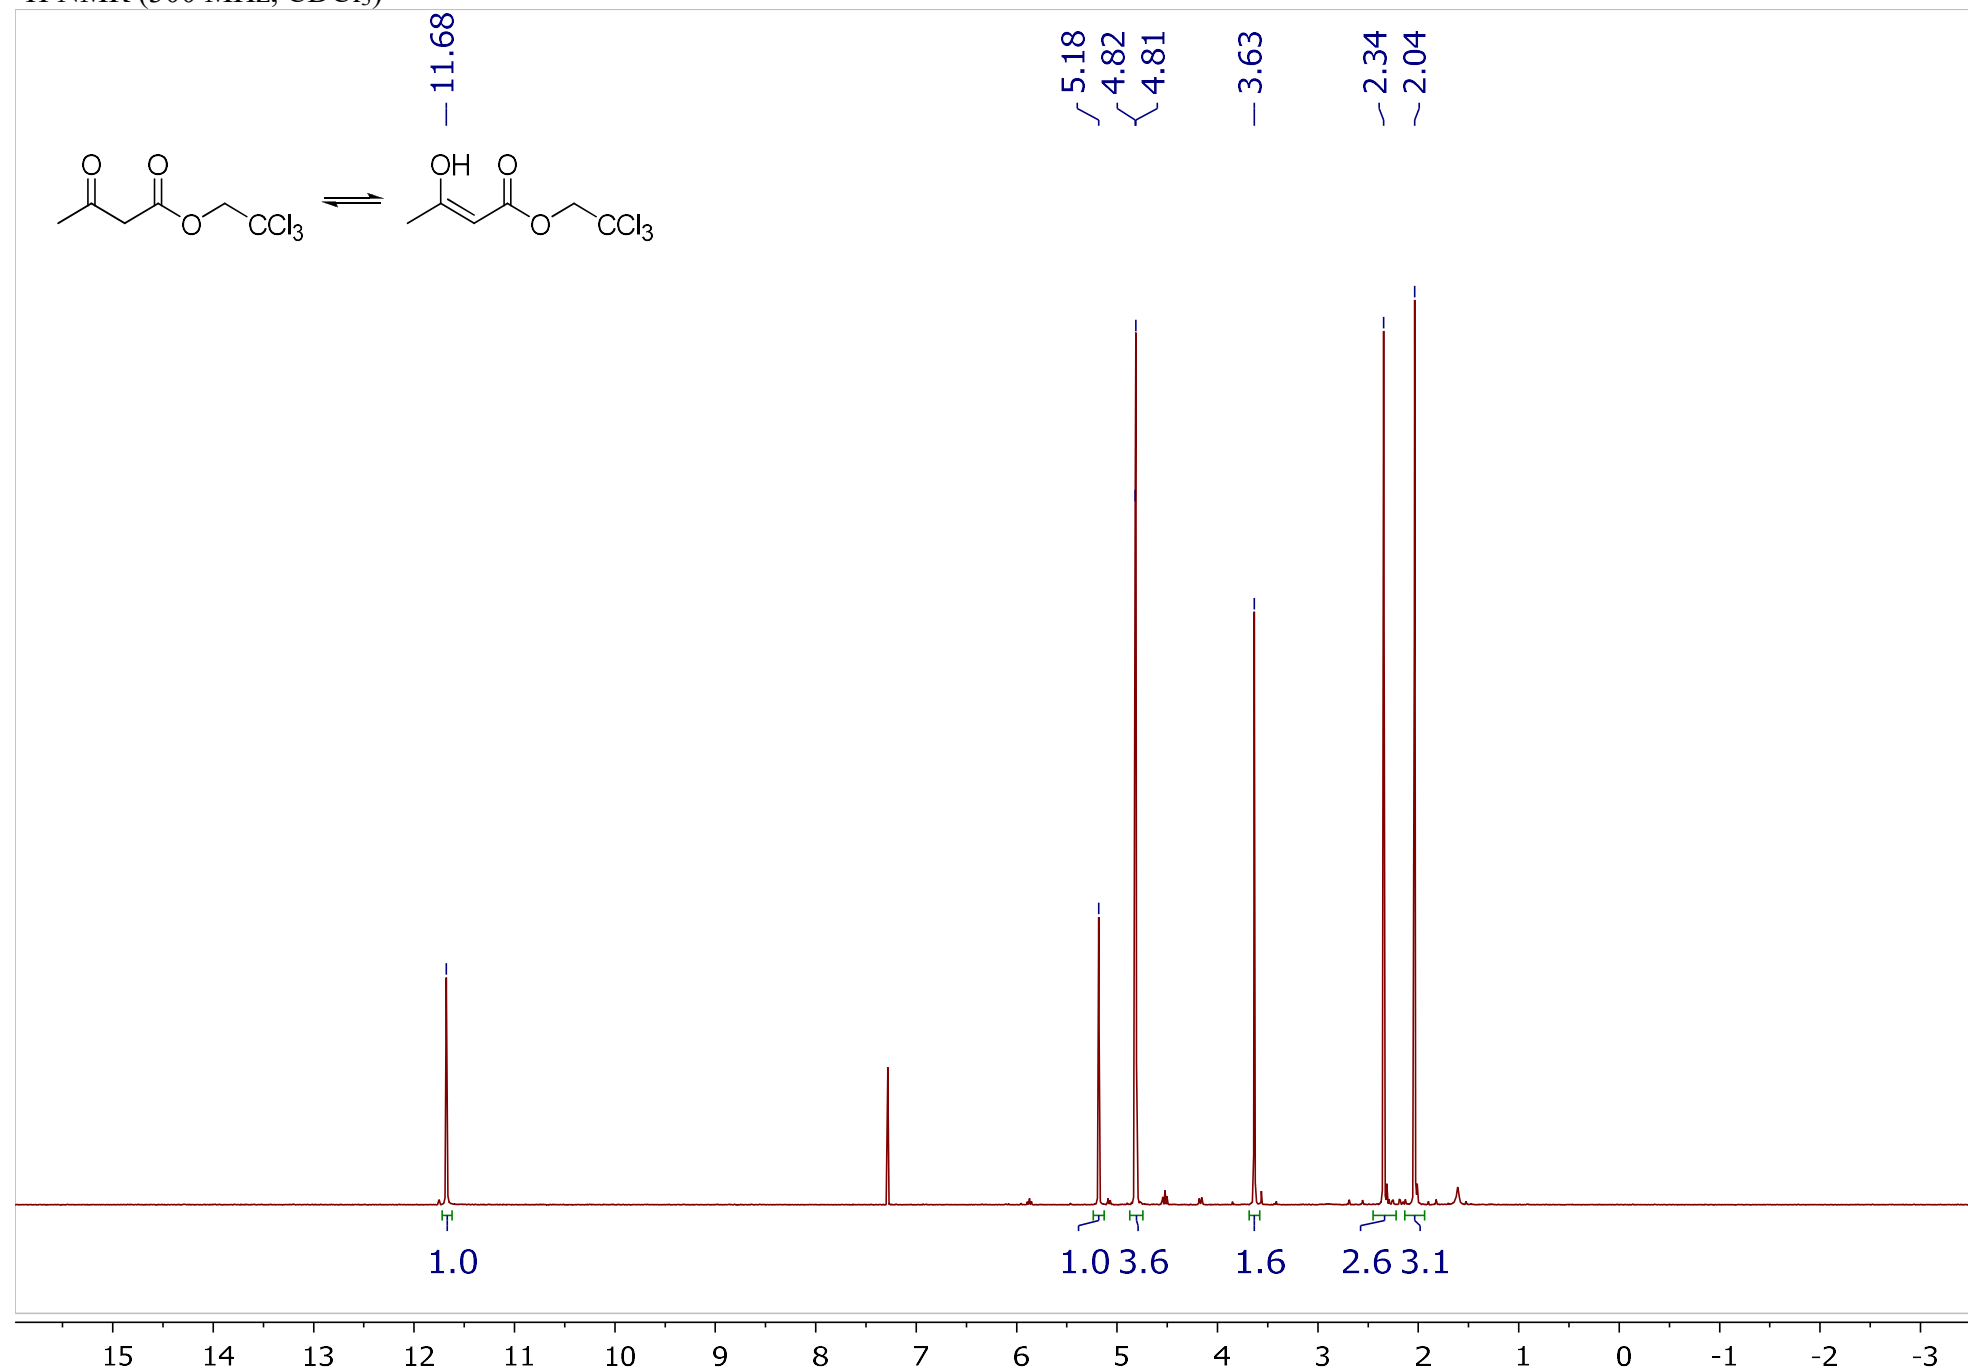



<sup>13</sup>C NMR (75 MHz, CDCl<sub>3</sub>)

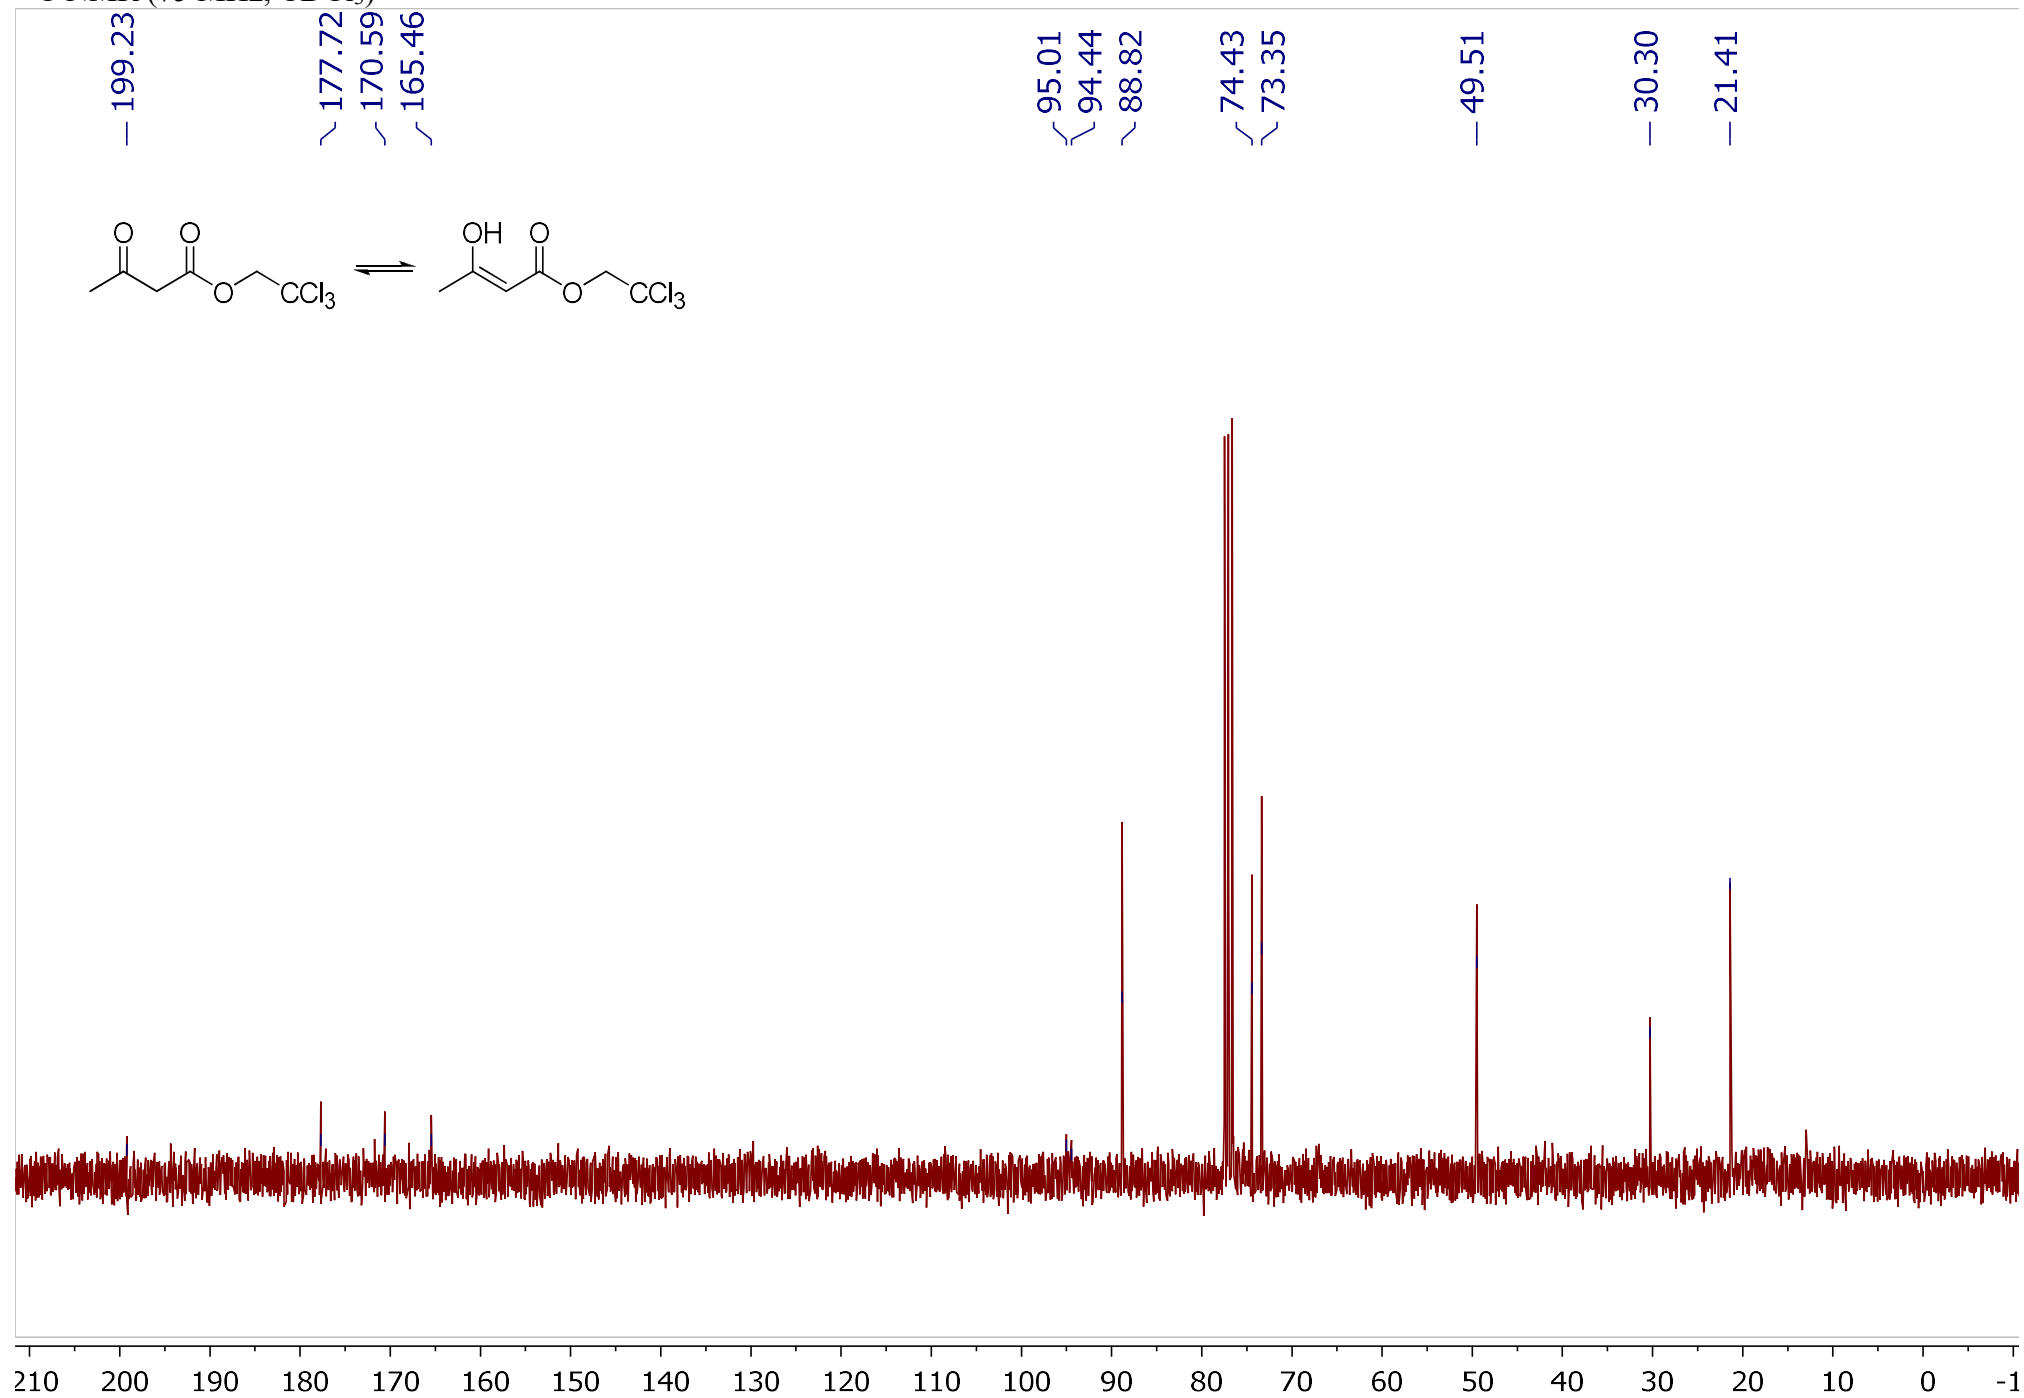

$^{13}\text{C}$  DEPT 135 (75 MHz,  $\text{CDCl}_3$ )

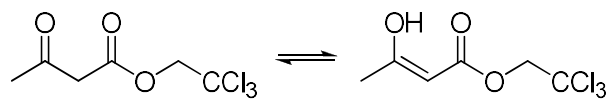

— 88.83

74.43

73.35

— 49.51

— 30.30

— 21.41

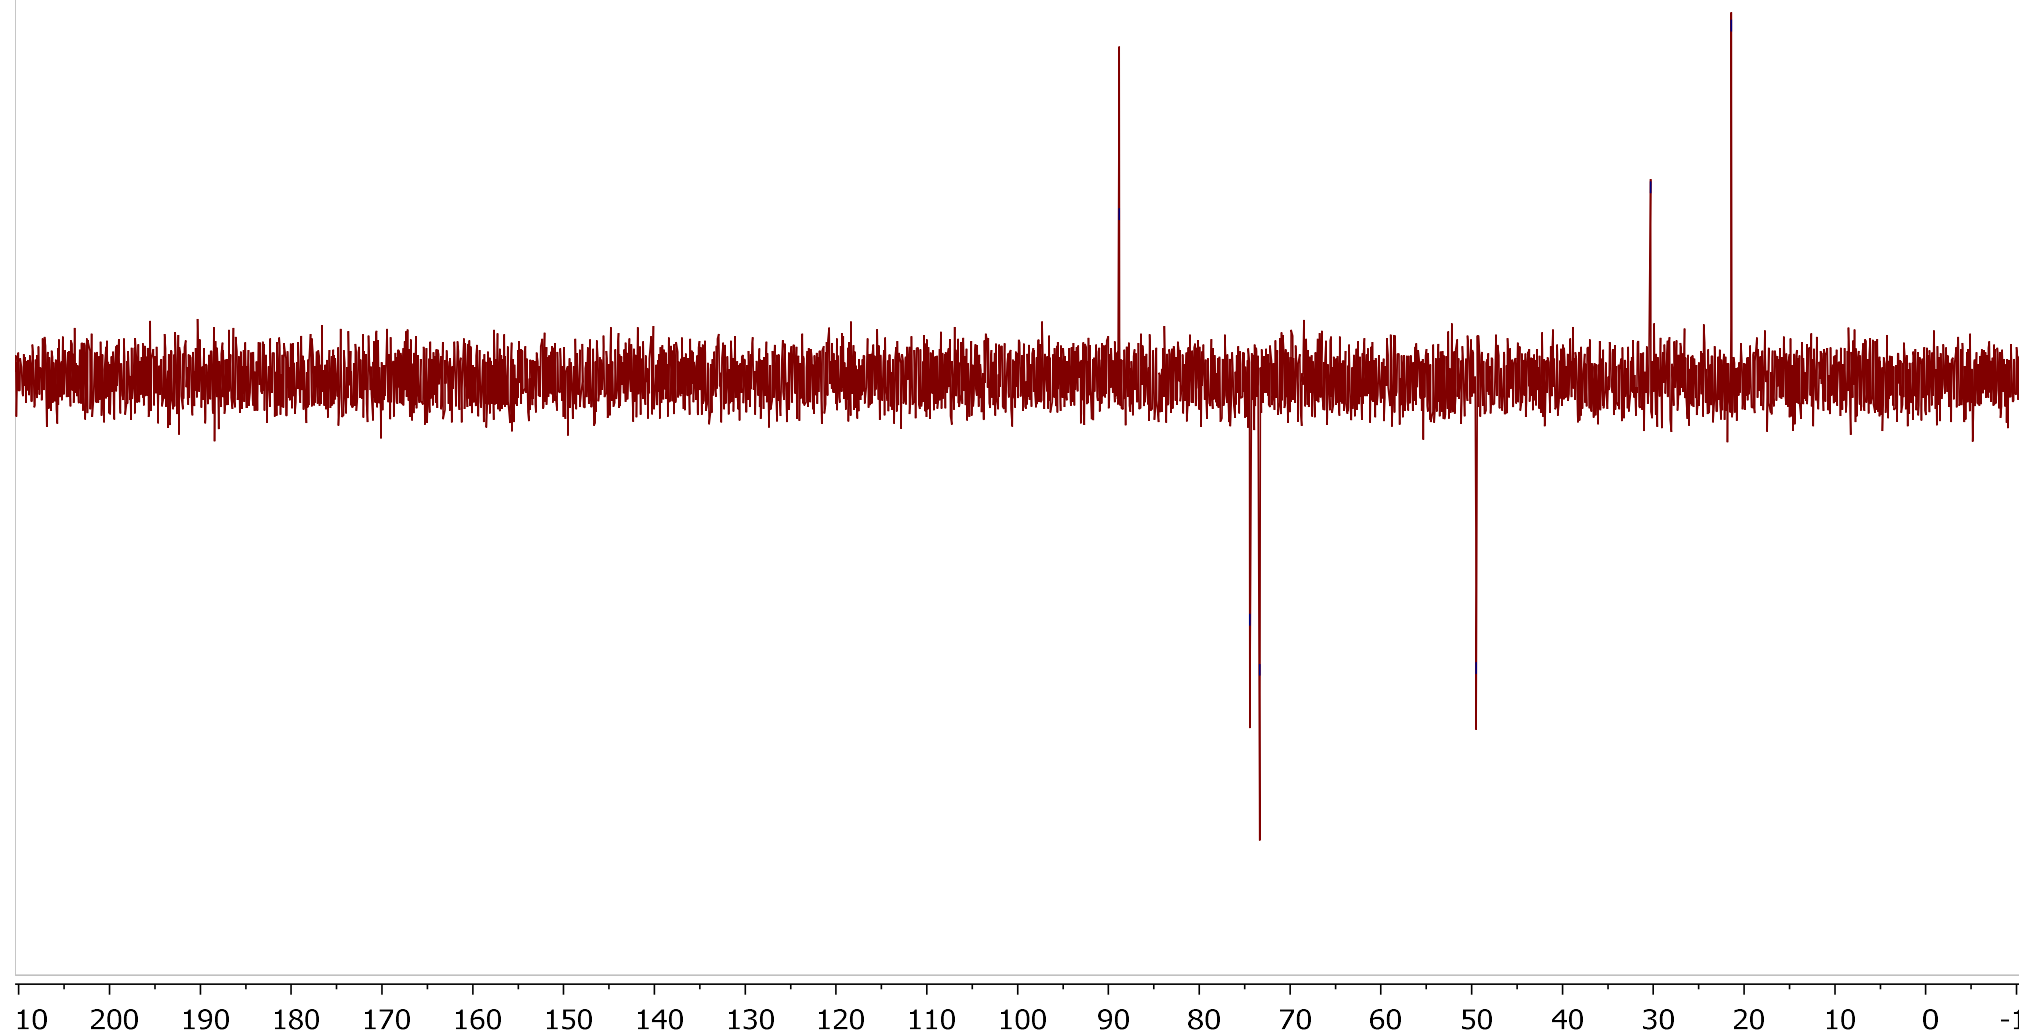

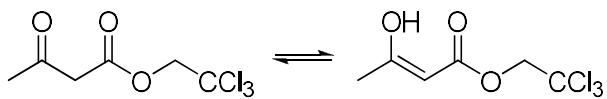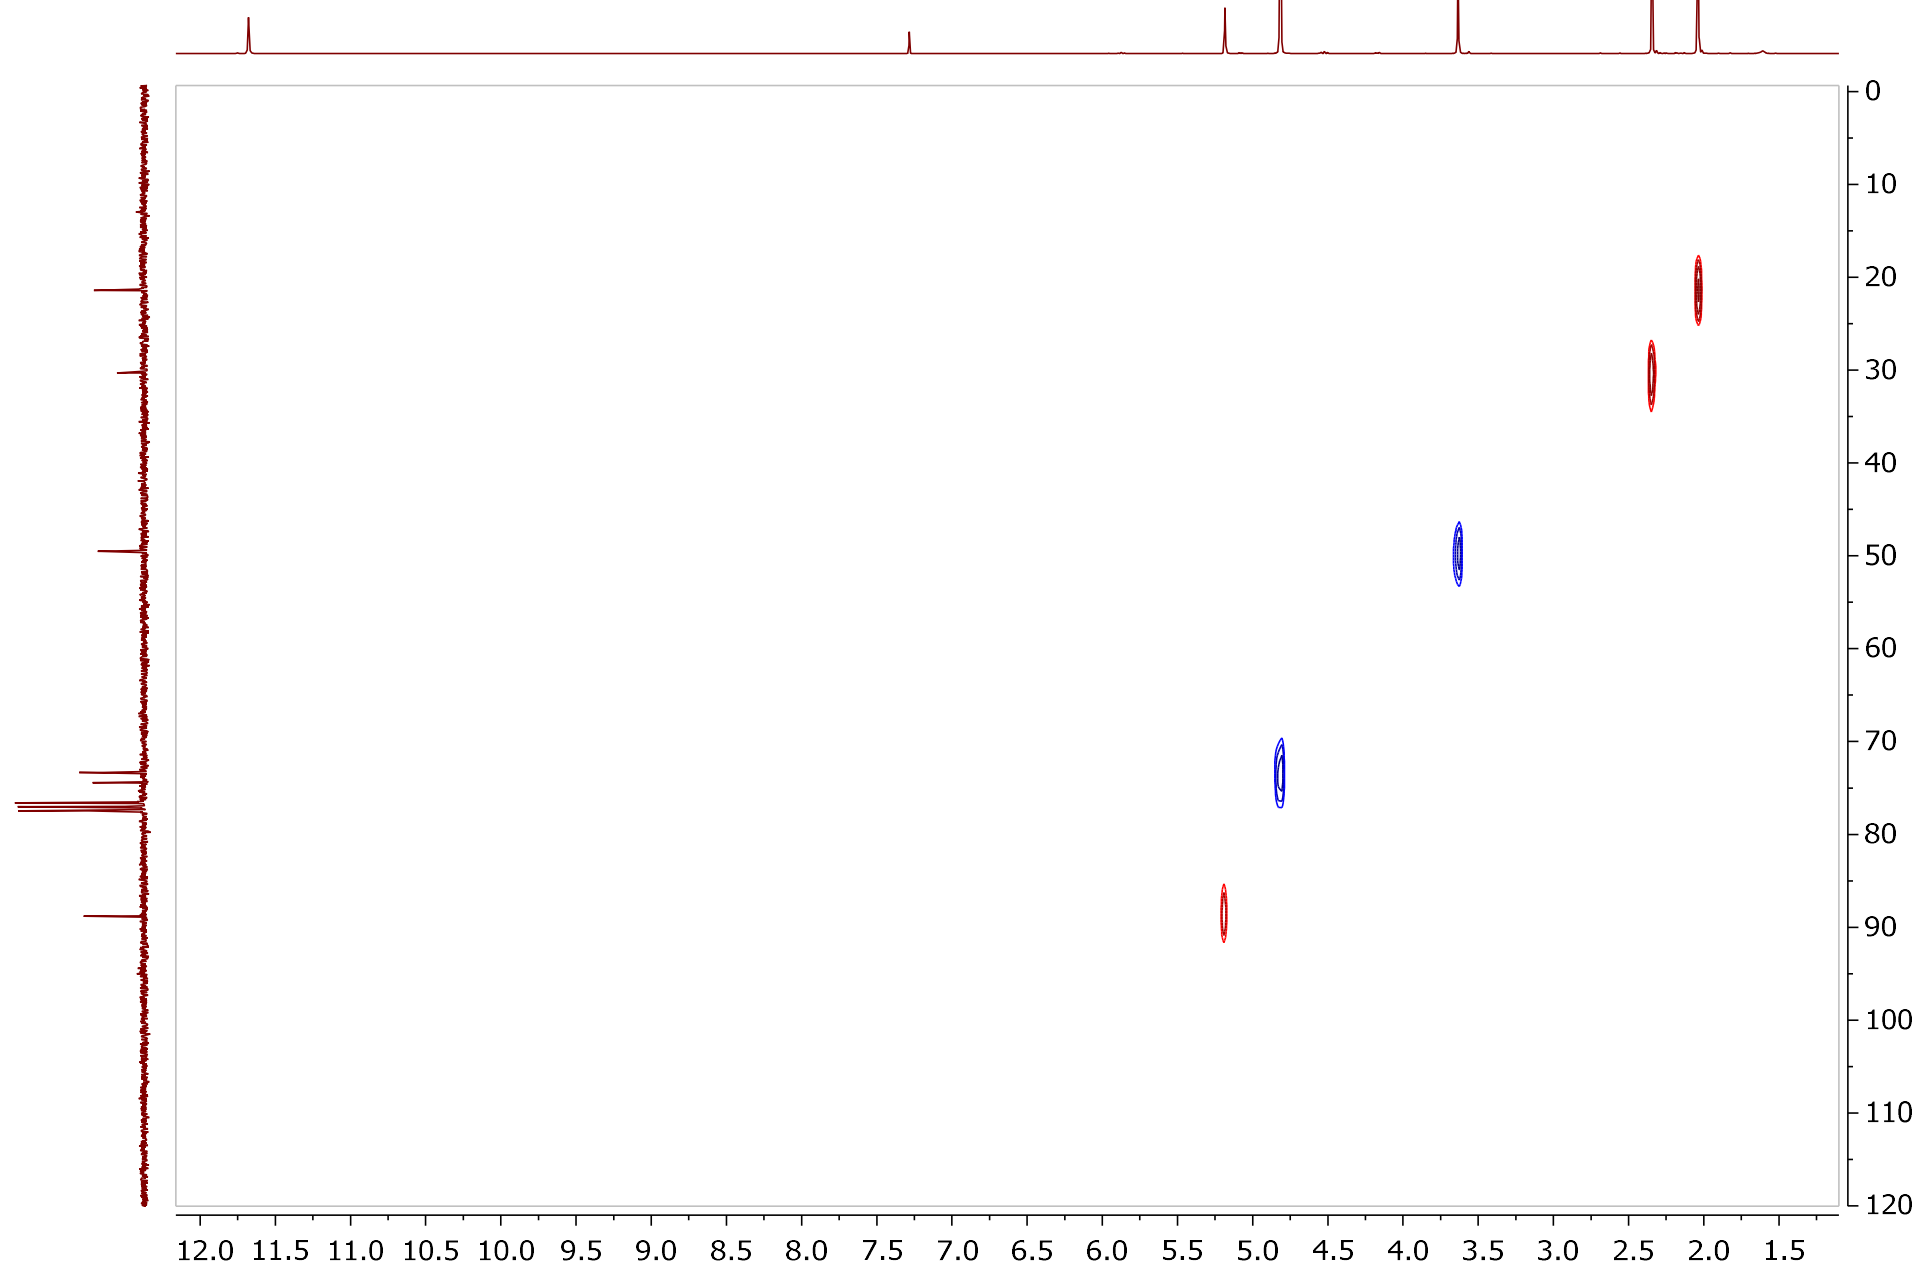

$^1\text{H}$ - $^{13}\text{C}$  HMBC

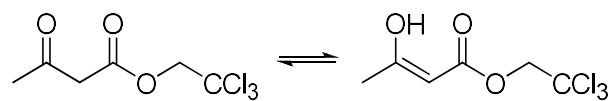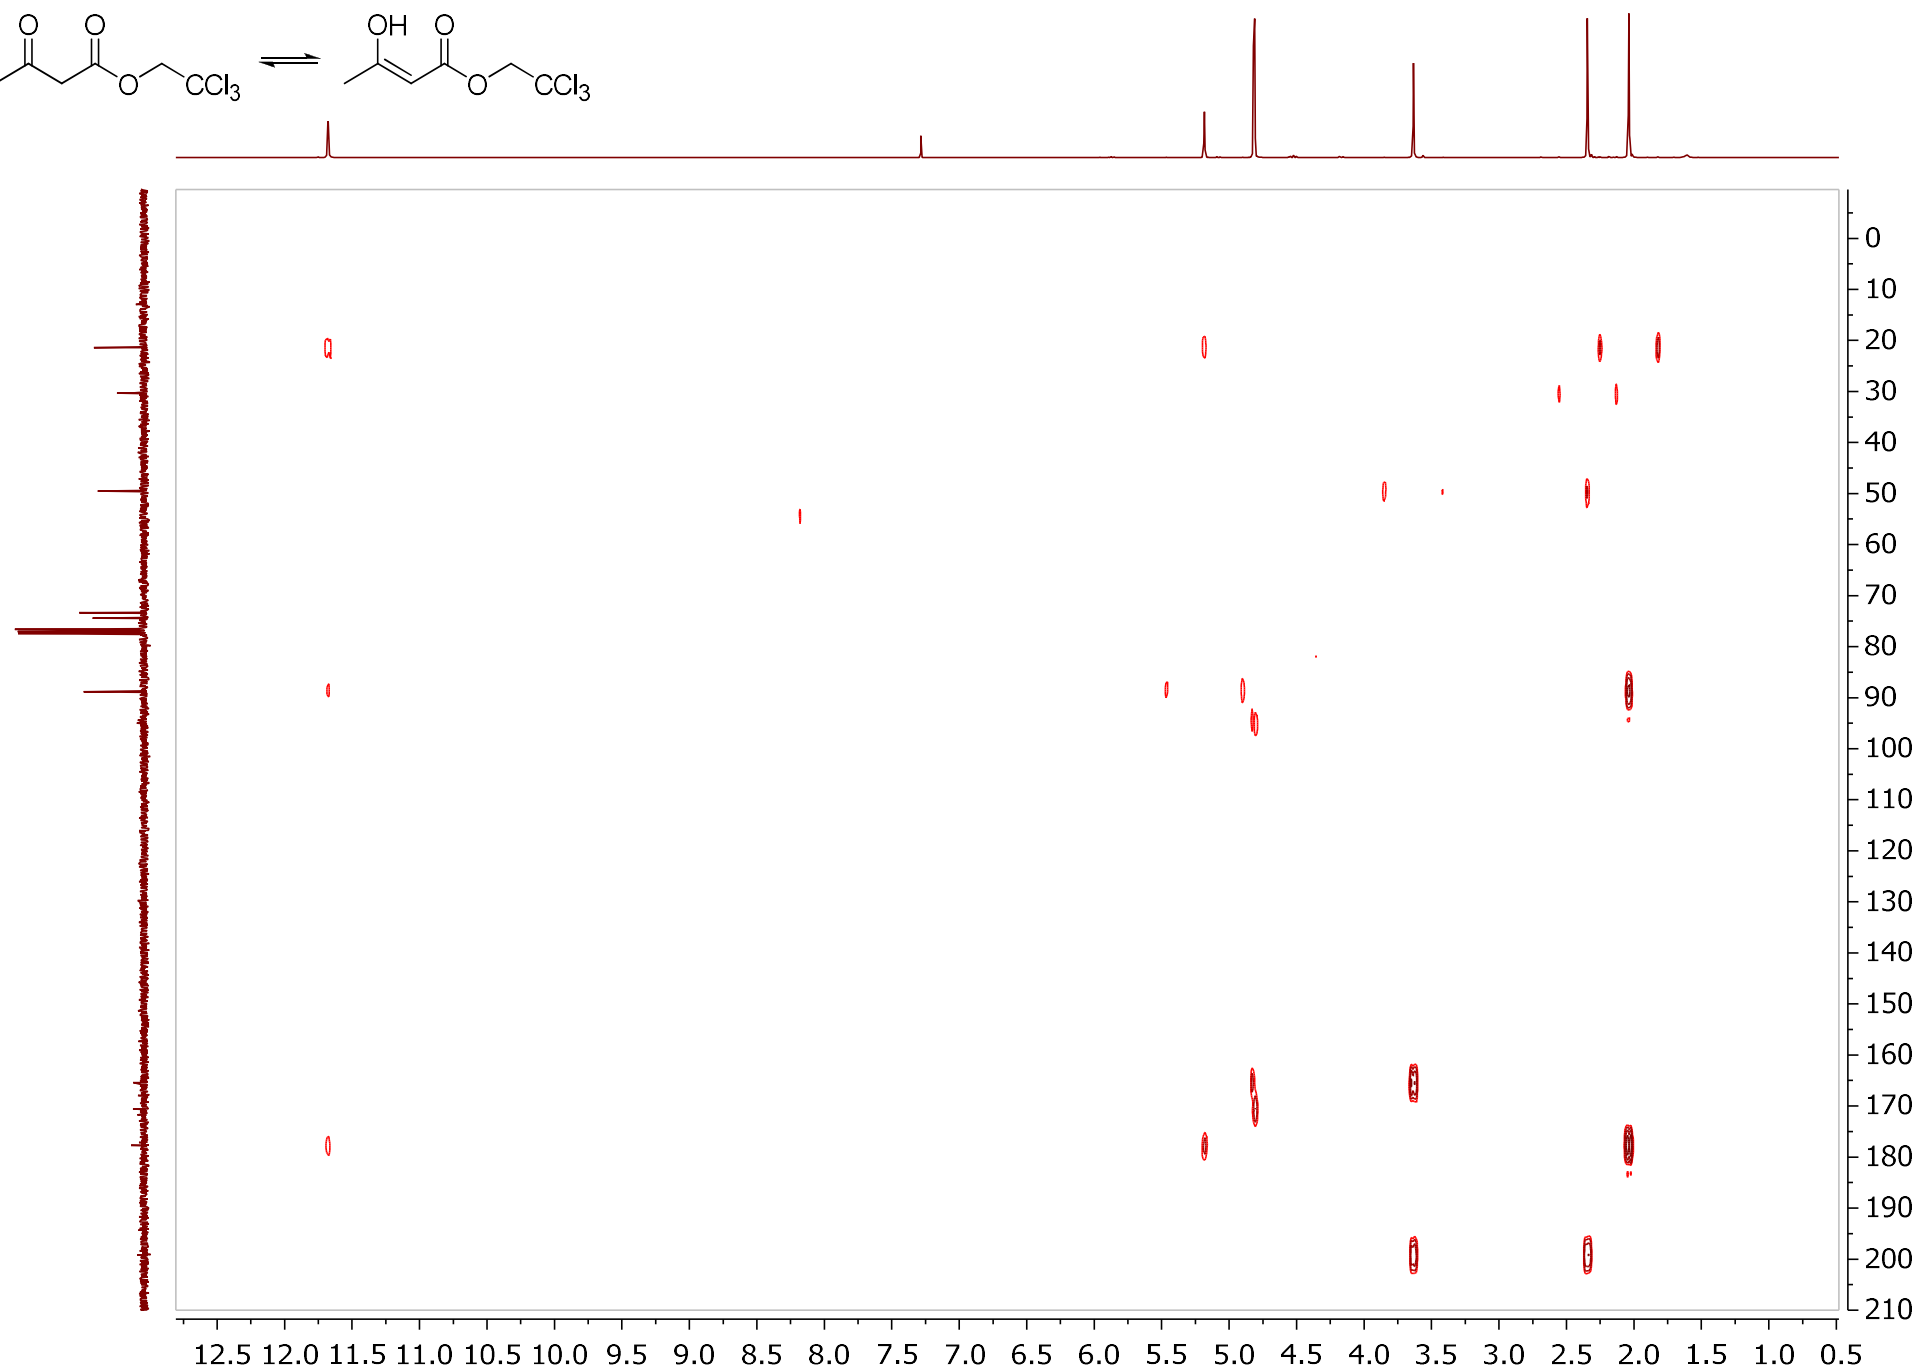

**2,2,2-Trichloroethyl 2-diazobut-3-enoate 2a**

$^1\text{H}$  NMR (300 MHz,  $\text{CDCl}_3$ )

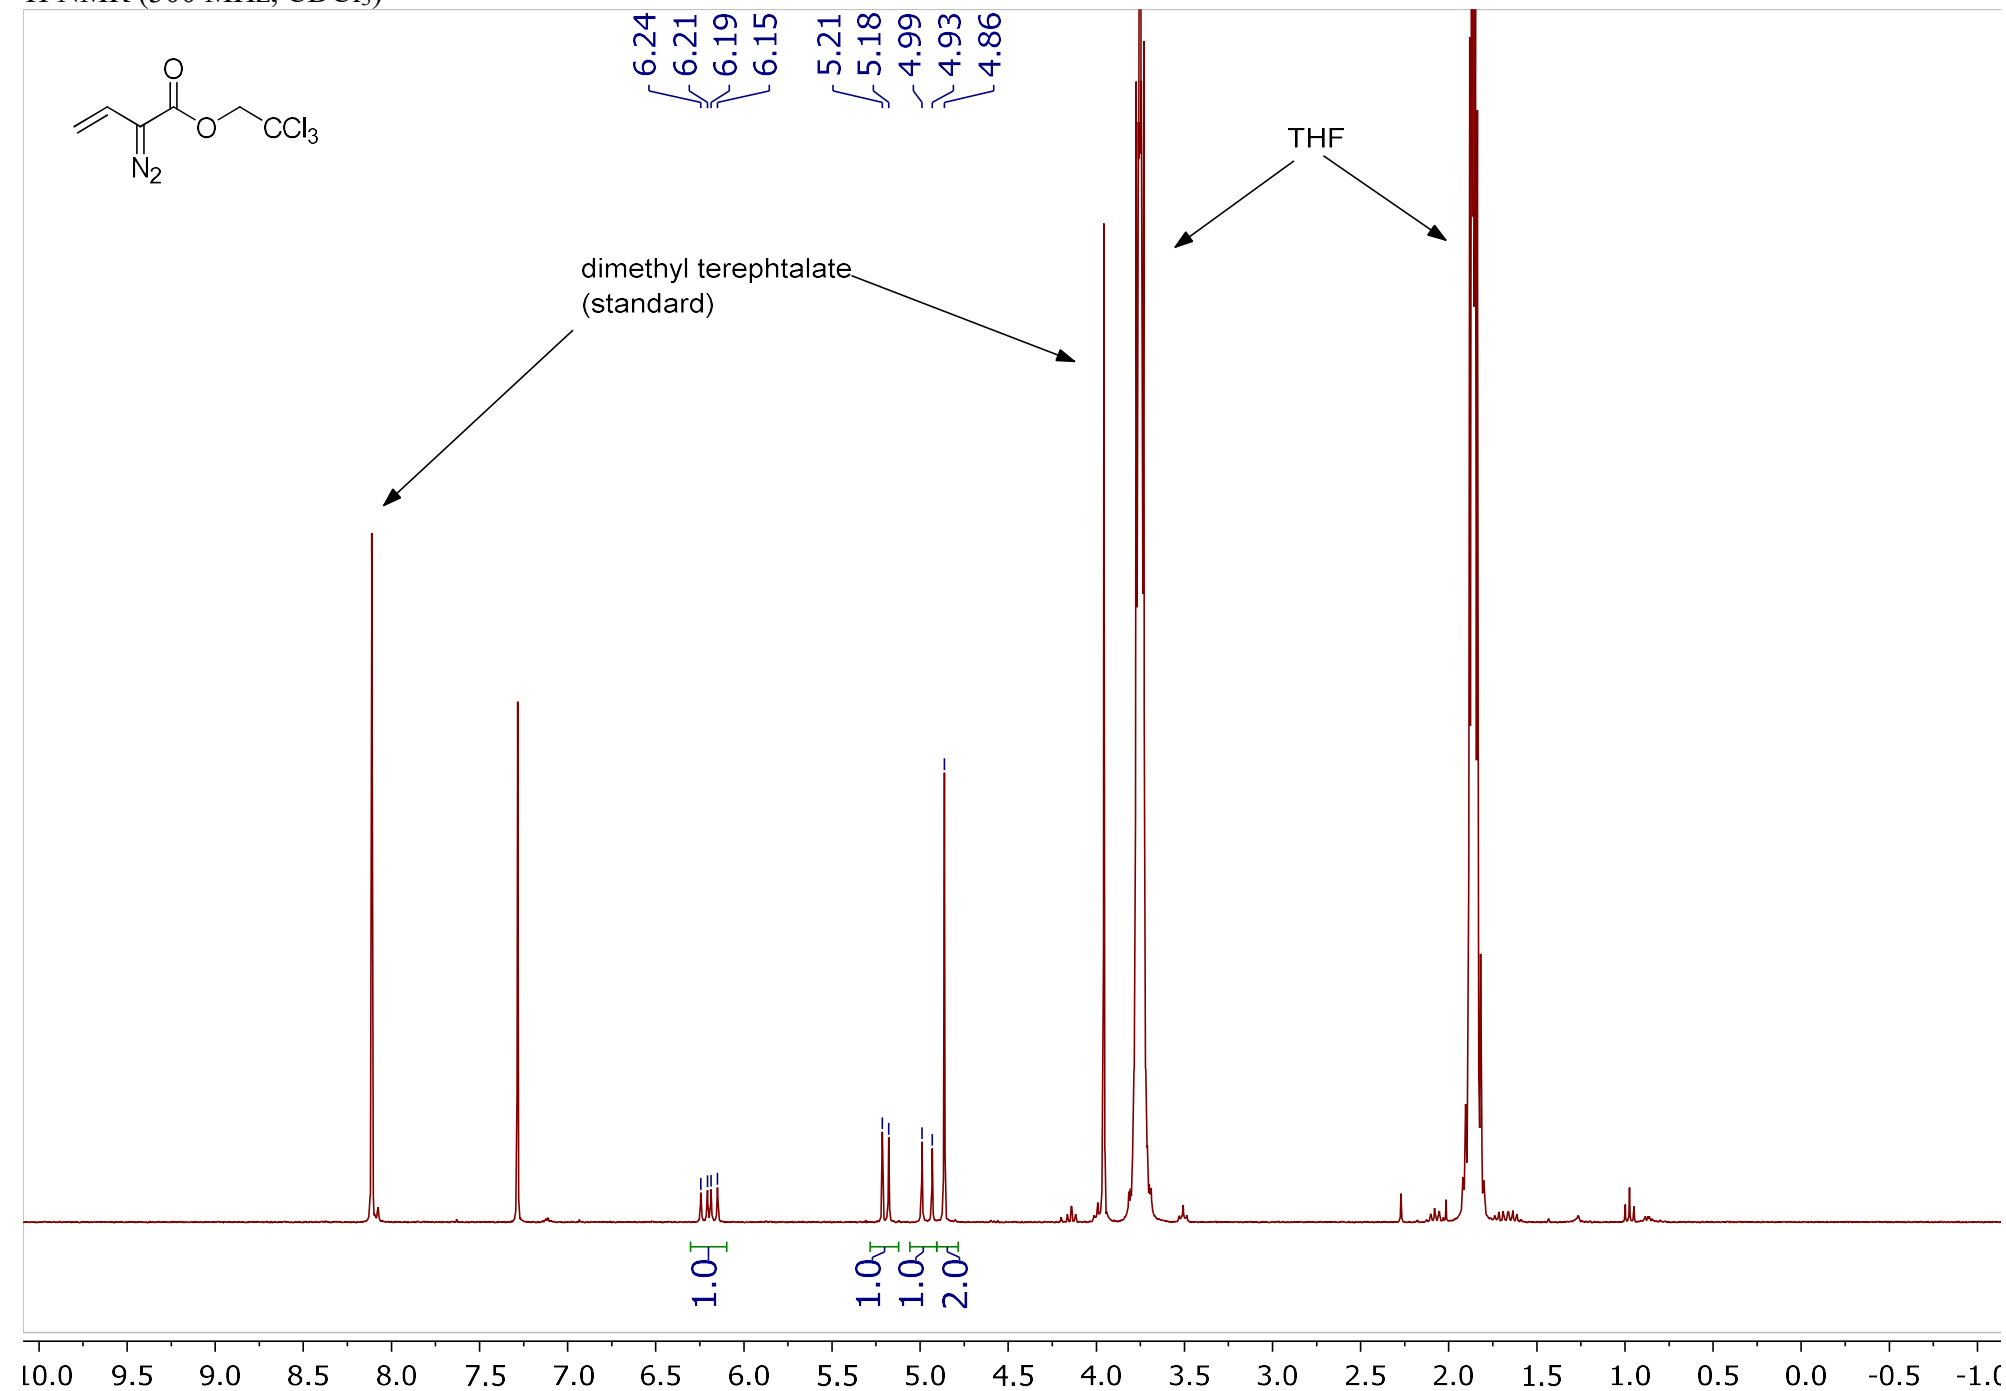

**4-Nitrobenzyl 2-diazobut-3-enoate 2e**

$^1\text{H}$  NMR (300 MHz,  $\text{CDCl}_3$ )

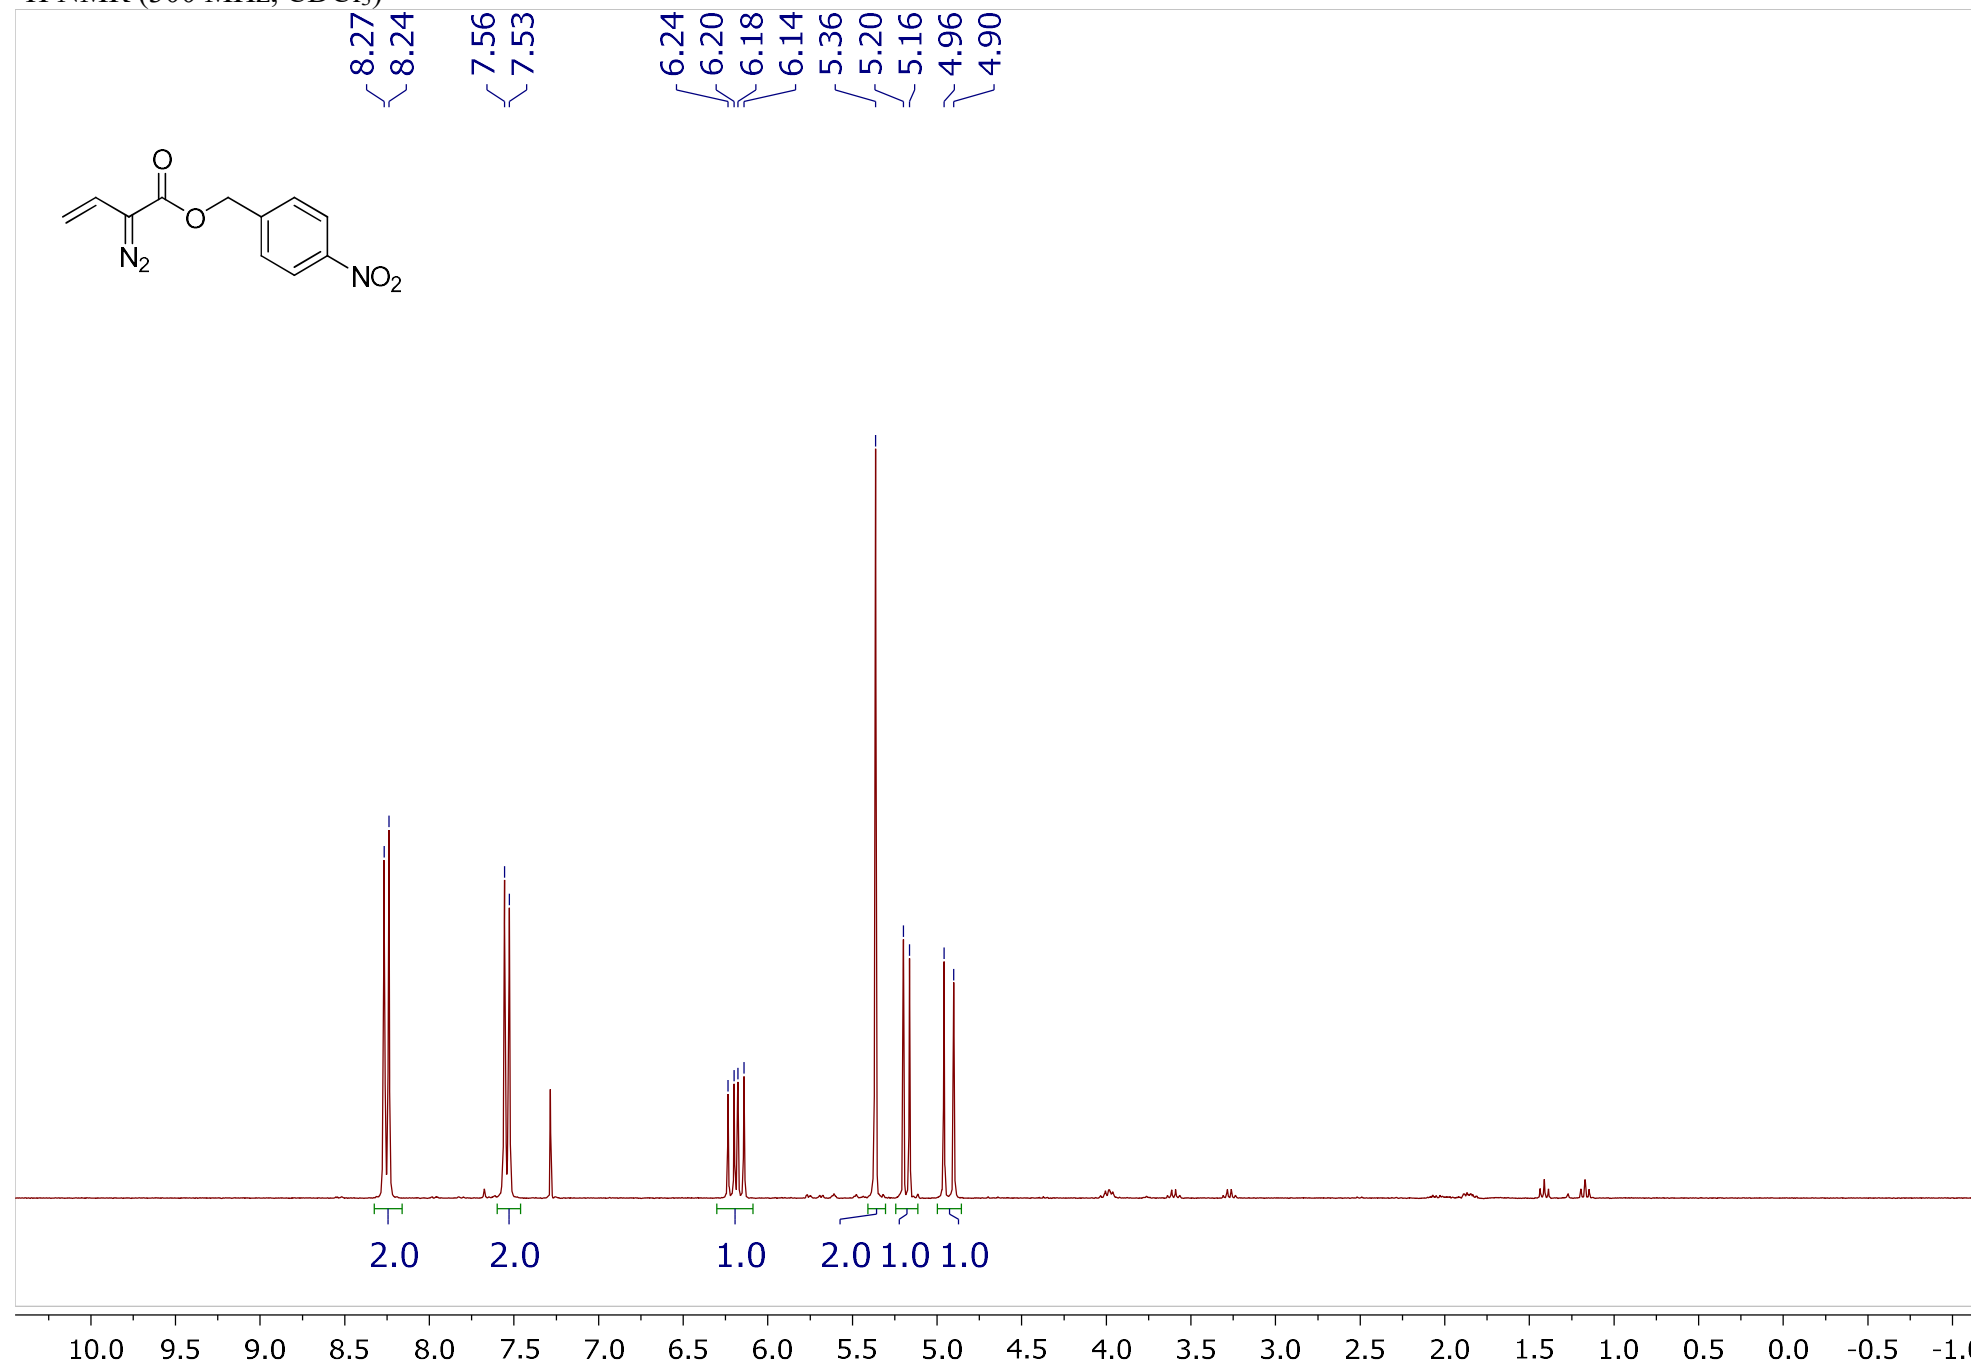

<sup>13</sup>C NMR (75 MHz, CDCl<sub>3</sub>)

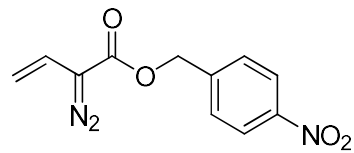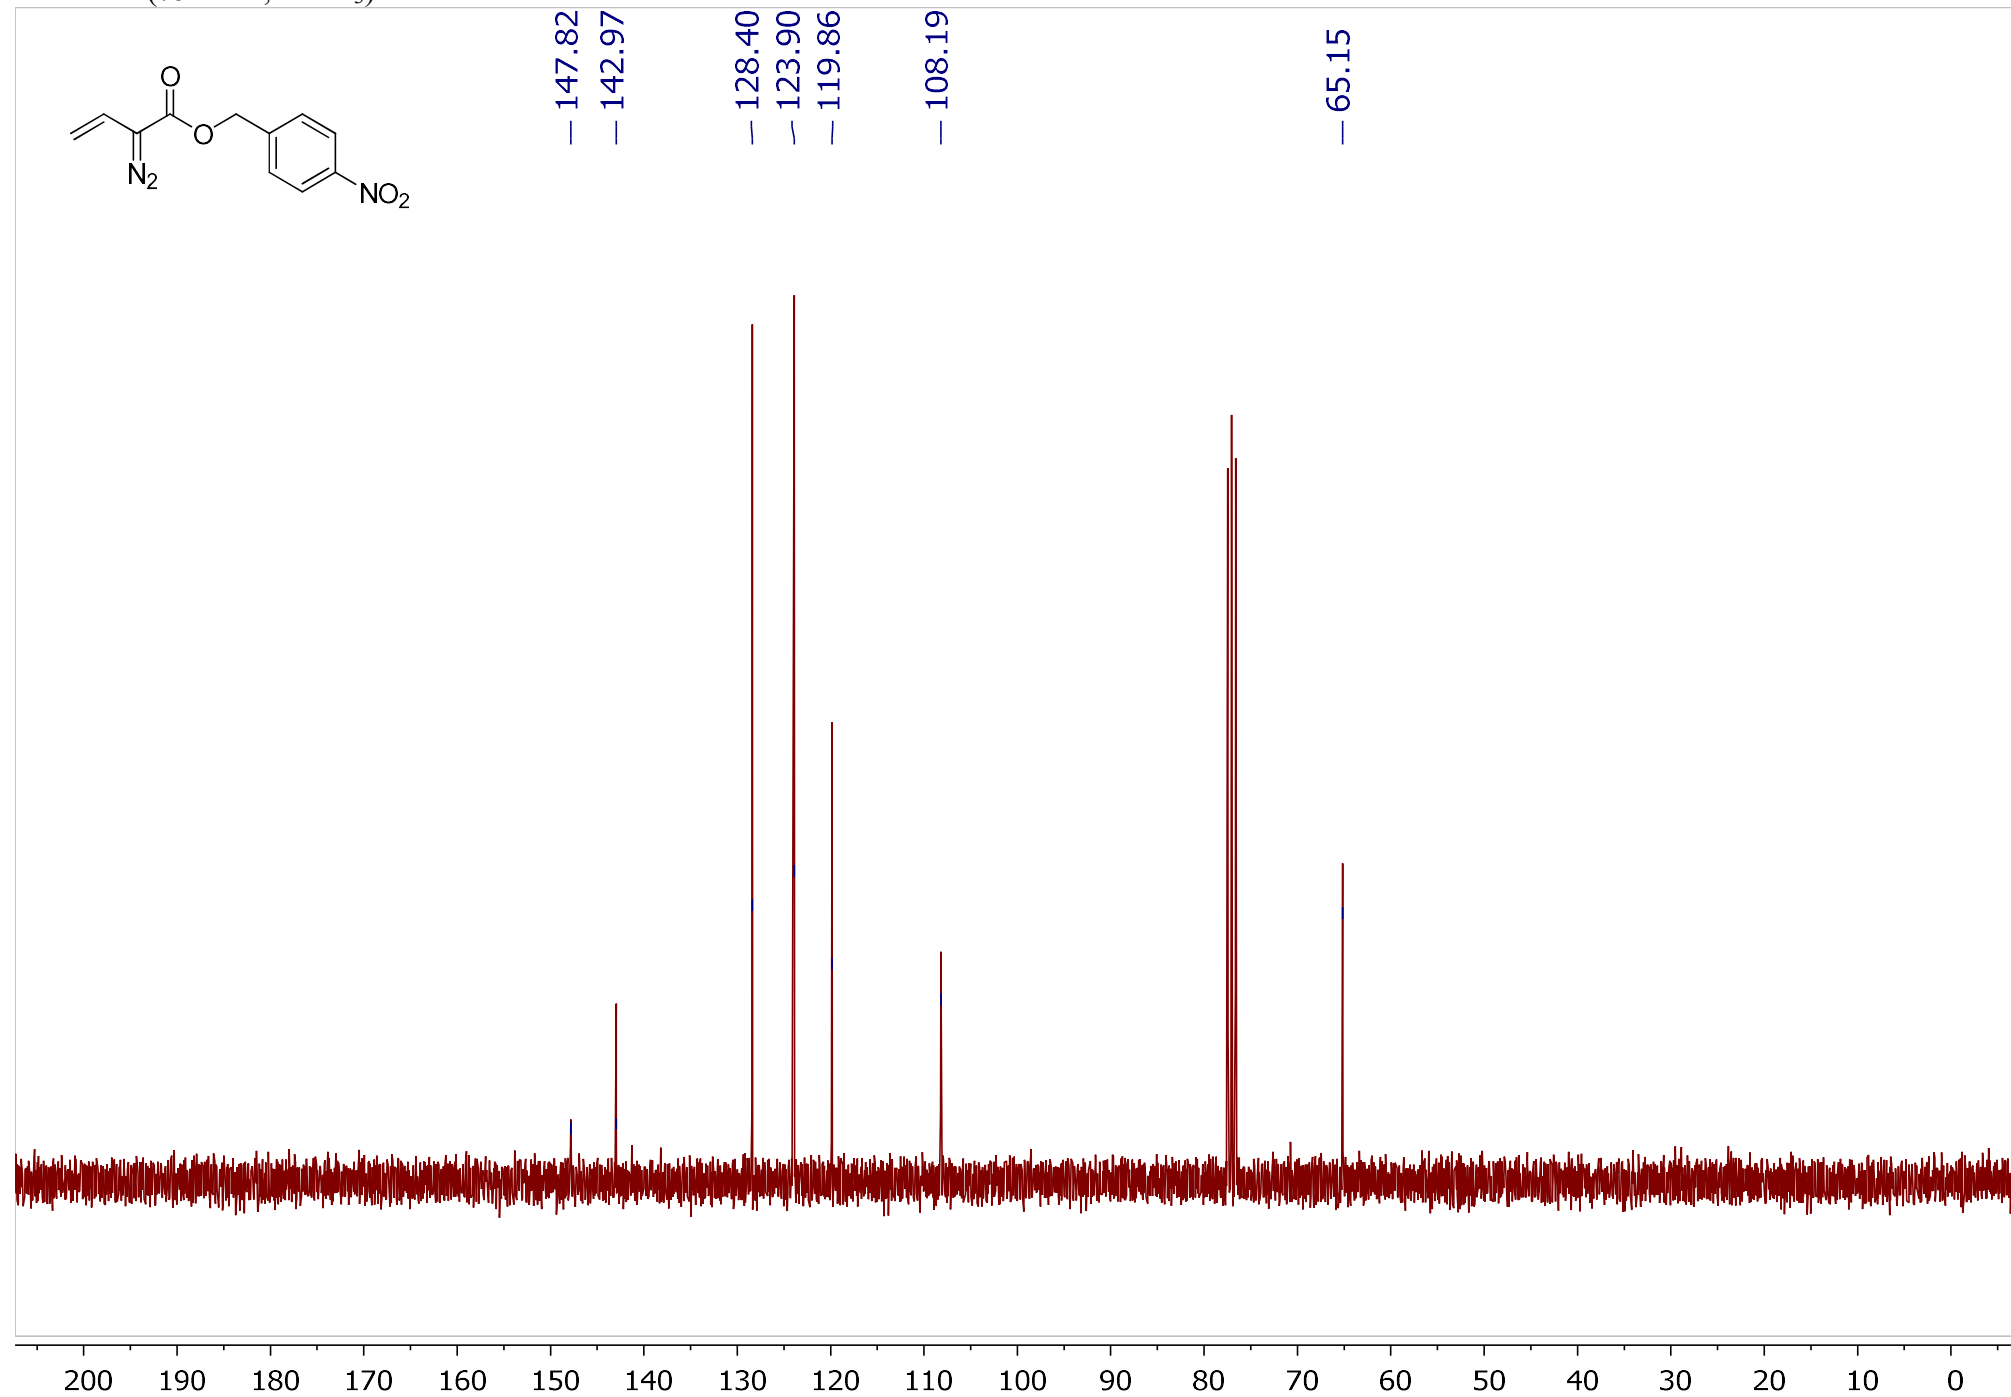

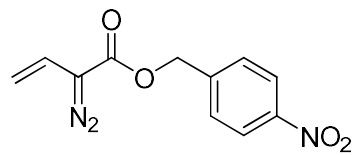

— 128.40

— 123.90

— 119.86

— 108.19

— 65.15

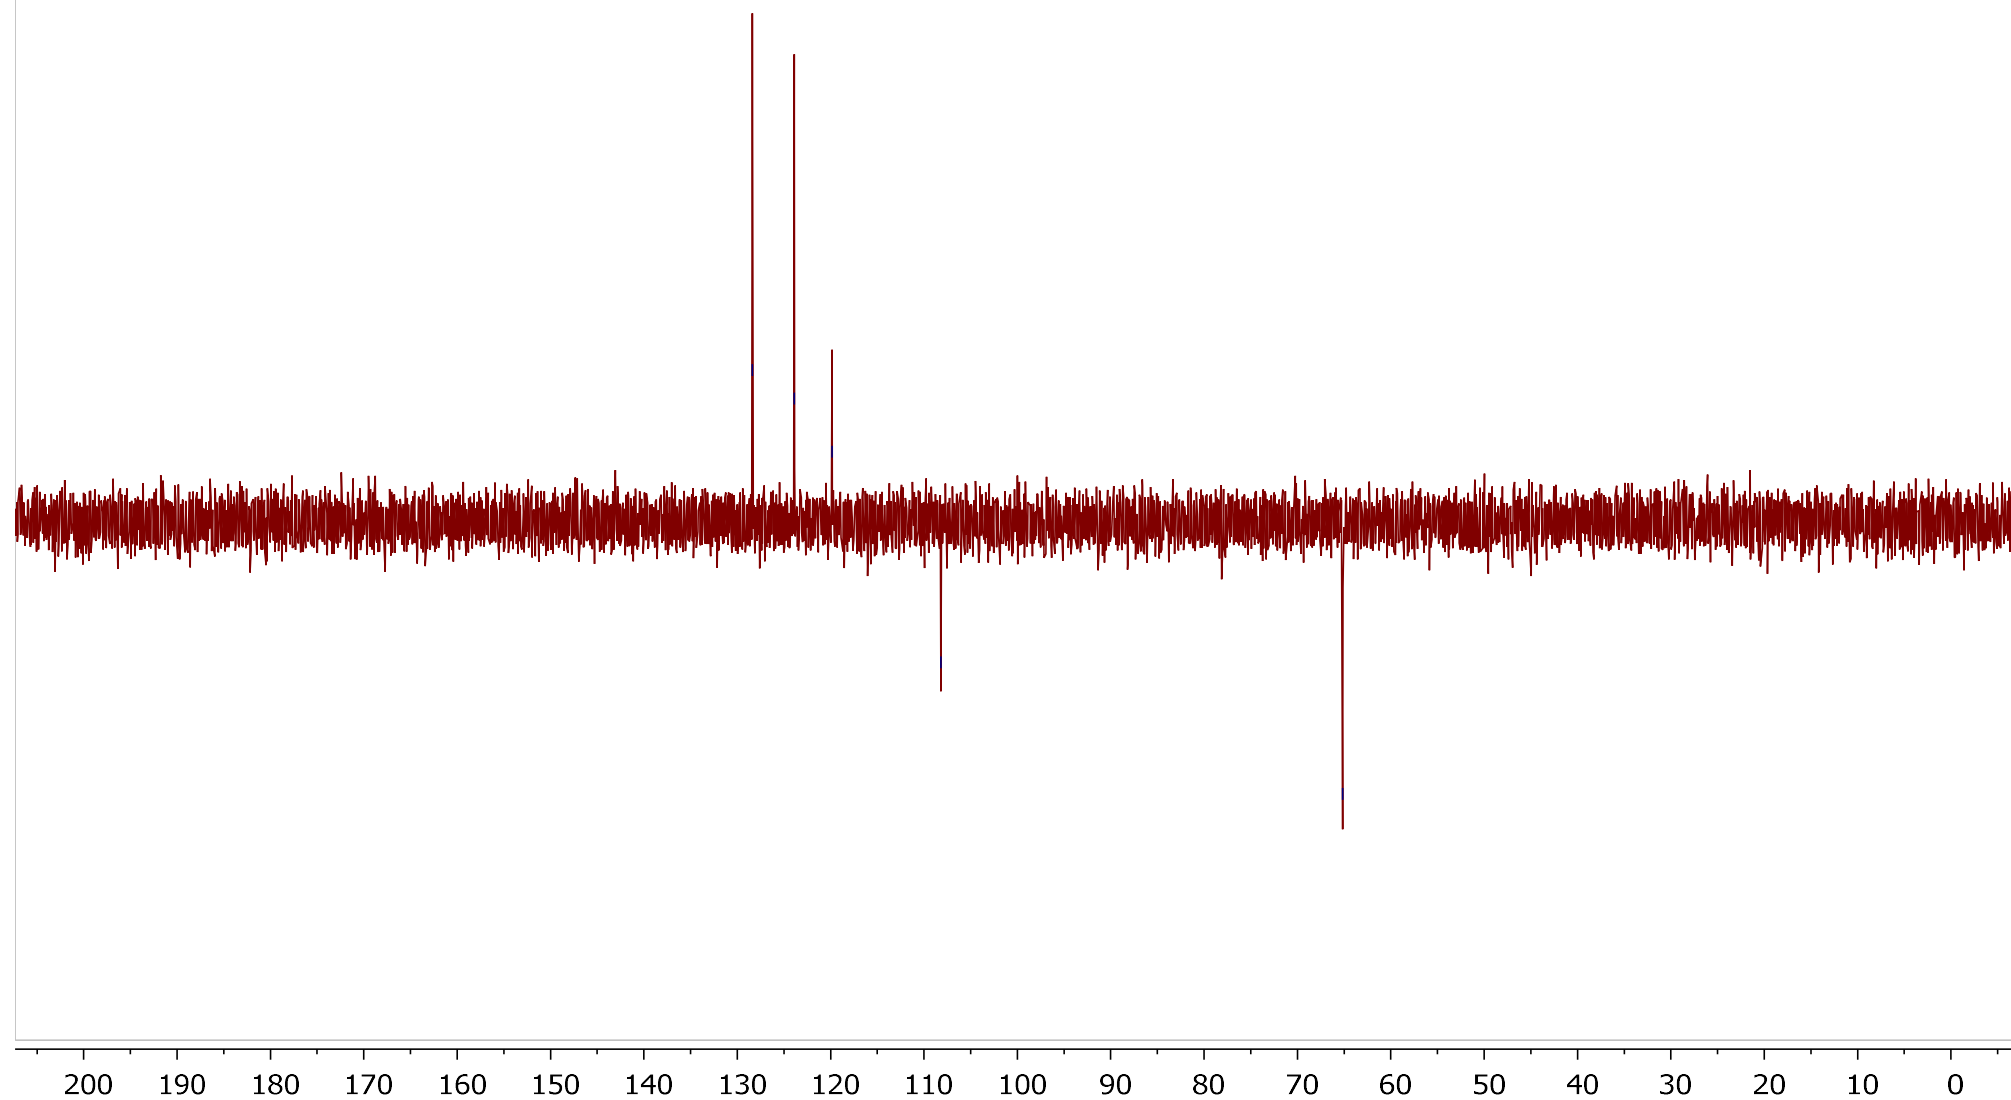



$^1\text{H}$ - $^{13}\text{C}$  HMBC

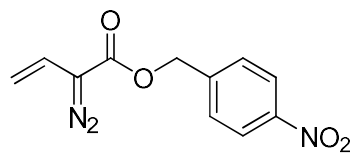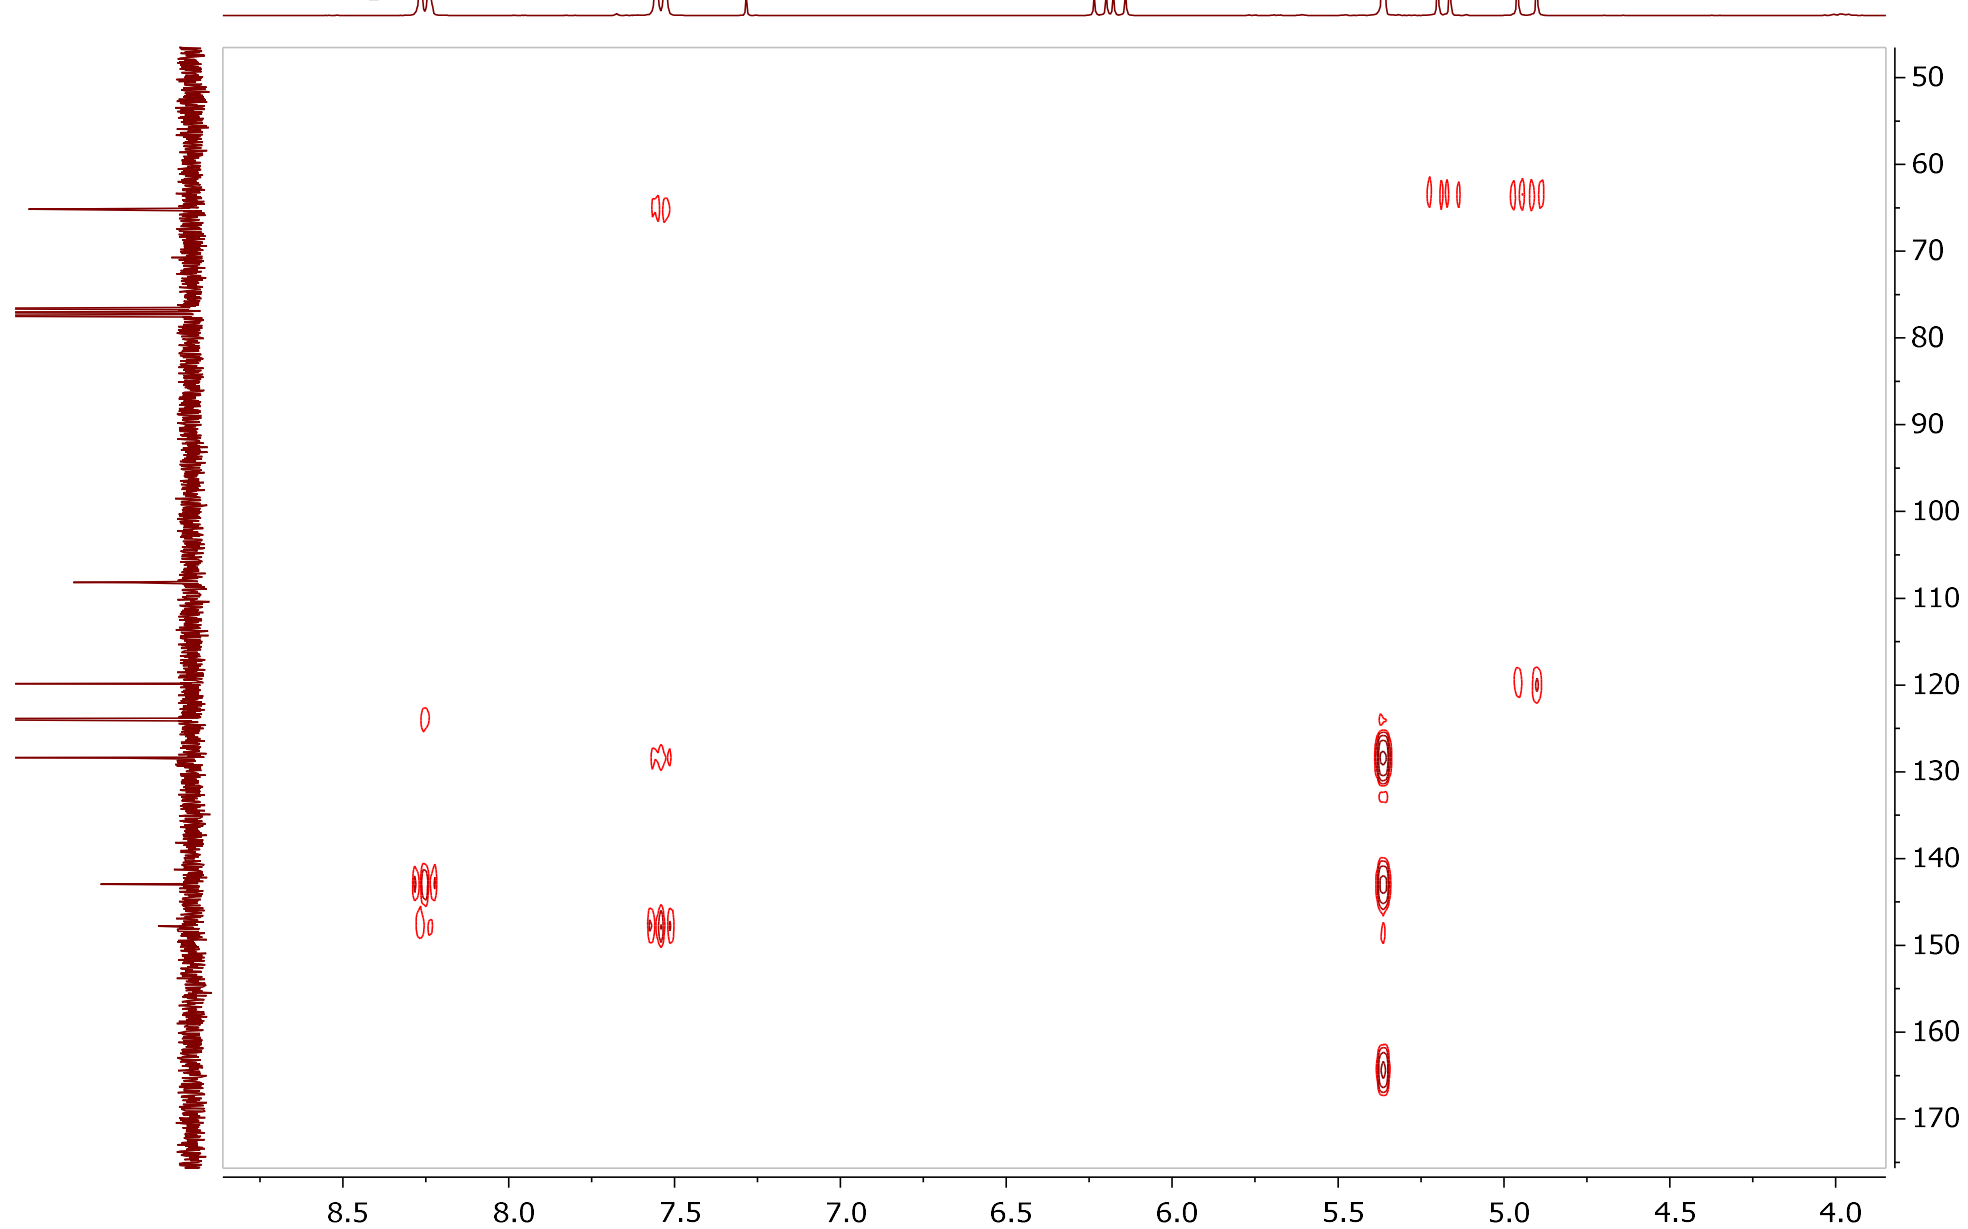

**Phenyl 2-diazobut-3-enoate 2f**

$^1\text{H}$  NMR (300 MHz,  $\text{CDCl}_3$ )

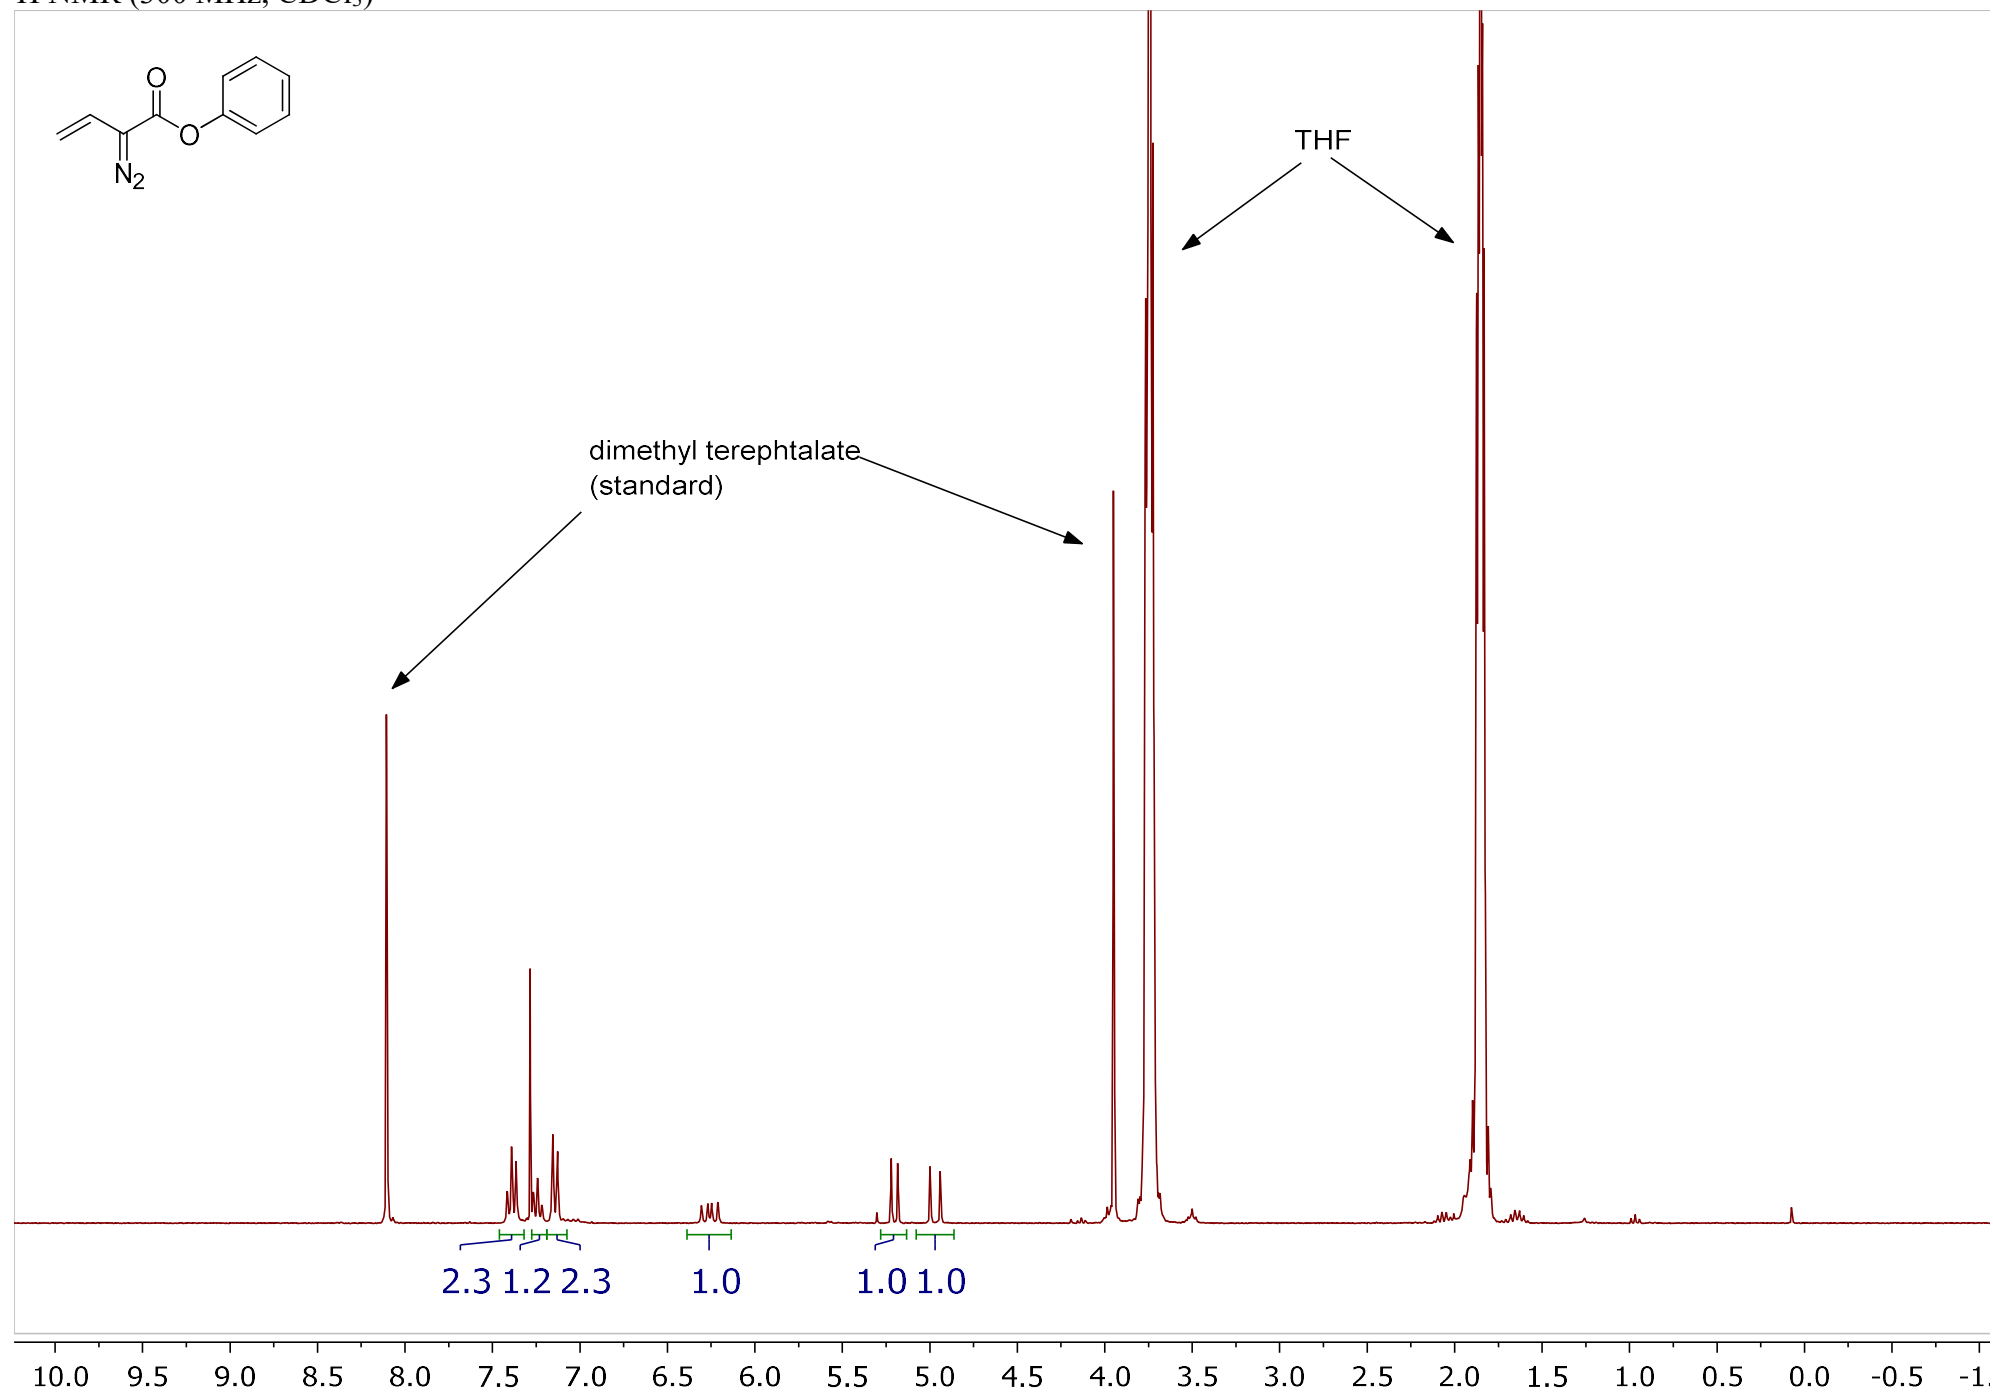

**2,2,2-Trichloroethyl (4aR\*,5S\*)-5-(4-methoxyphenyl)-7,7-dimethyl-4a,5,6,7-tetrahydro-2H-[1,2]oxazino[2,3-b][1,2]oxazine-4-carboxylate 3a**  
<sup>1</sup>H NMR (300 MHz, CDCl<sub>3</sub>)

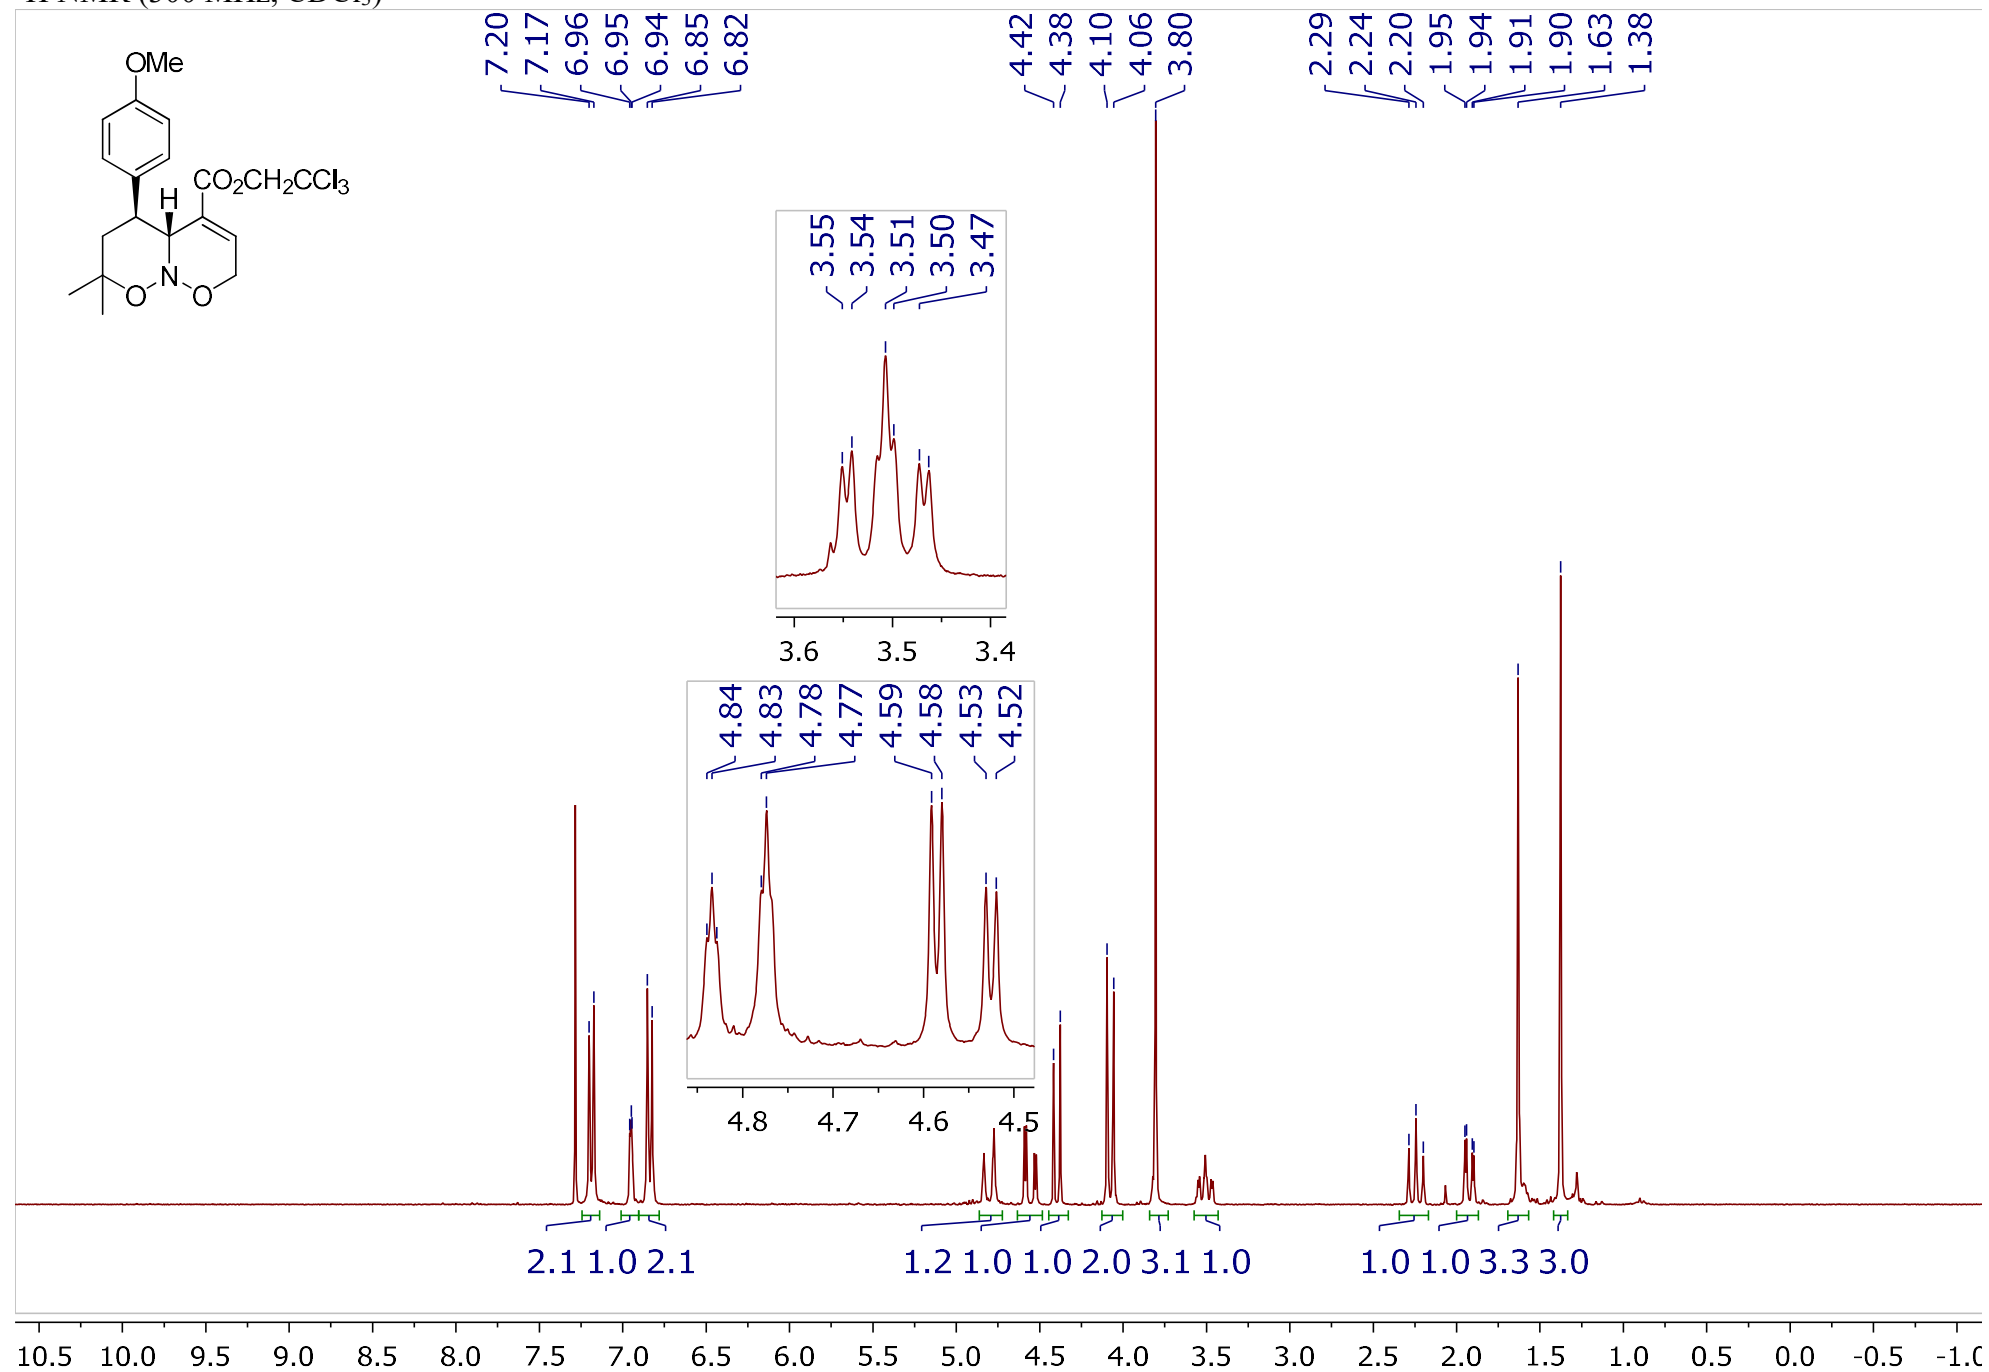

<sup>13</sup>C NMR (75 MHz, CDCl<sub>3</sub>)

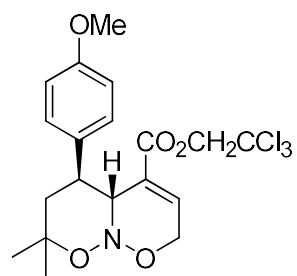

— 162.85

— 158.71

— 138.60

— 132.00

— 130.44

— 129.55

— 113.73

— 94.70

— 79.13

— 77.48

— 73.77

— 68.48

— 65.12

— 55.32

— 41.16

— 36.31

— 30.83

— 28.65

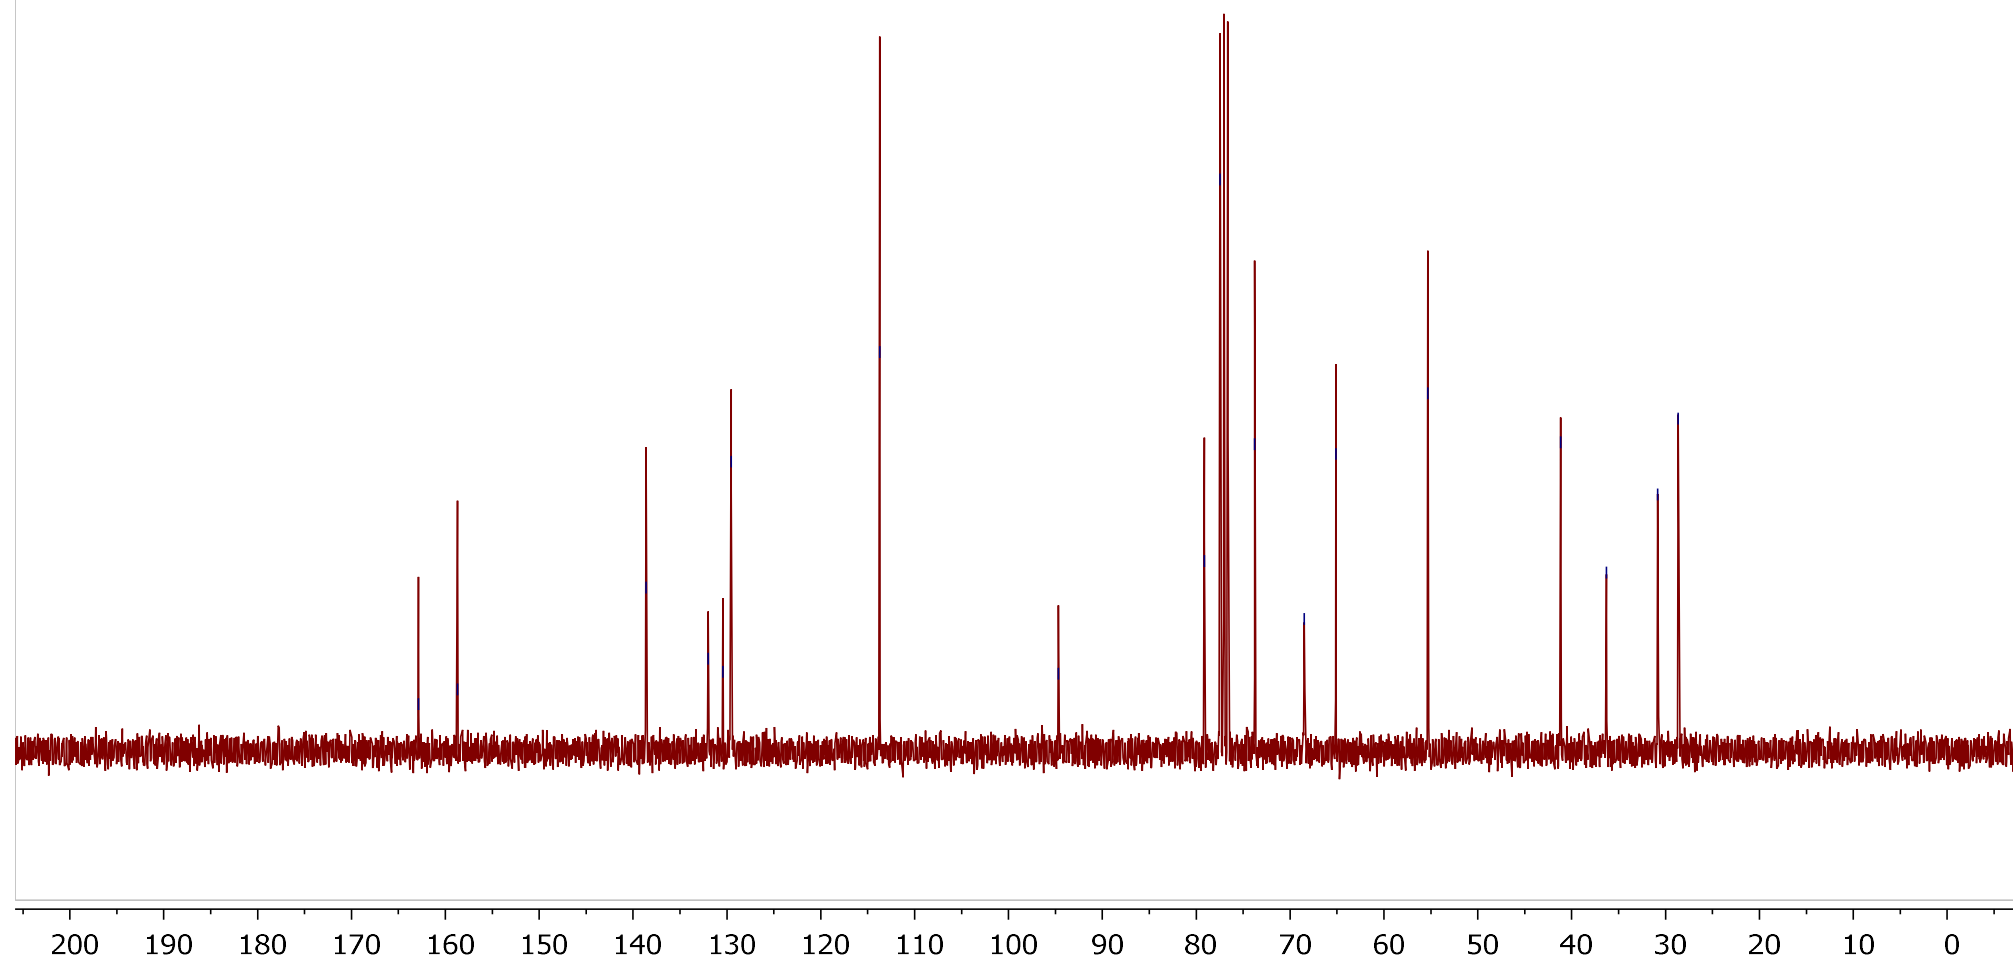

$^{13}\text{C}$  DEPT 135 (75 MHz,  $\text{CDCl}_3$ )

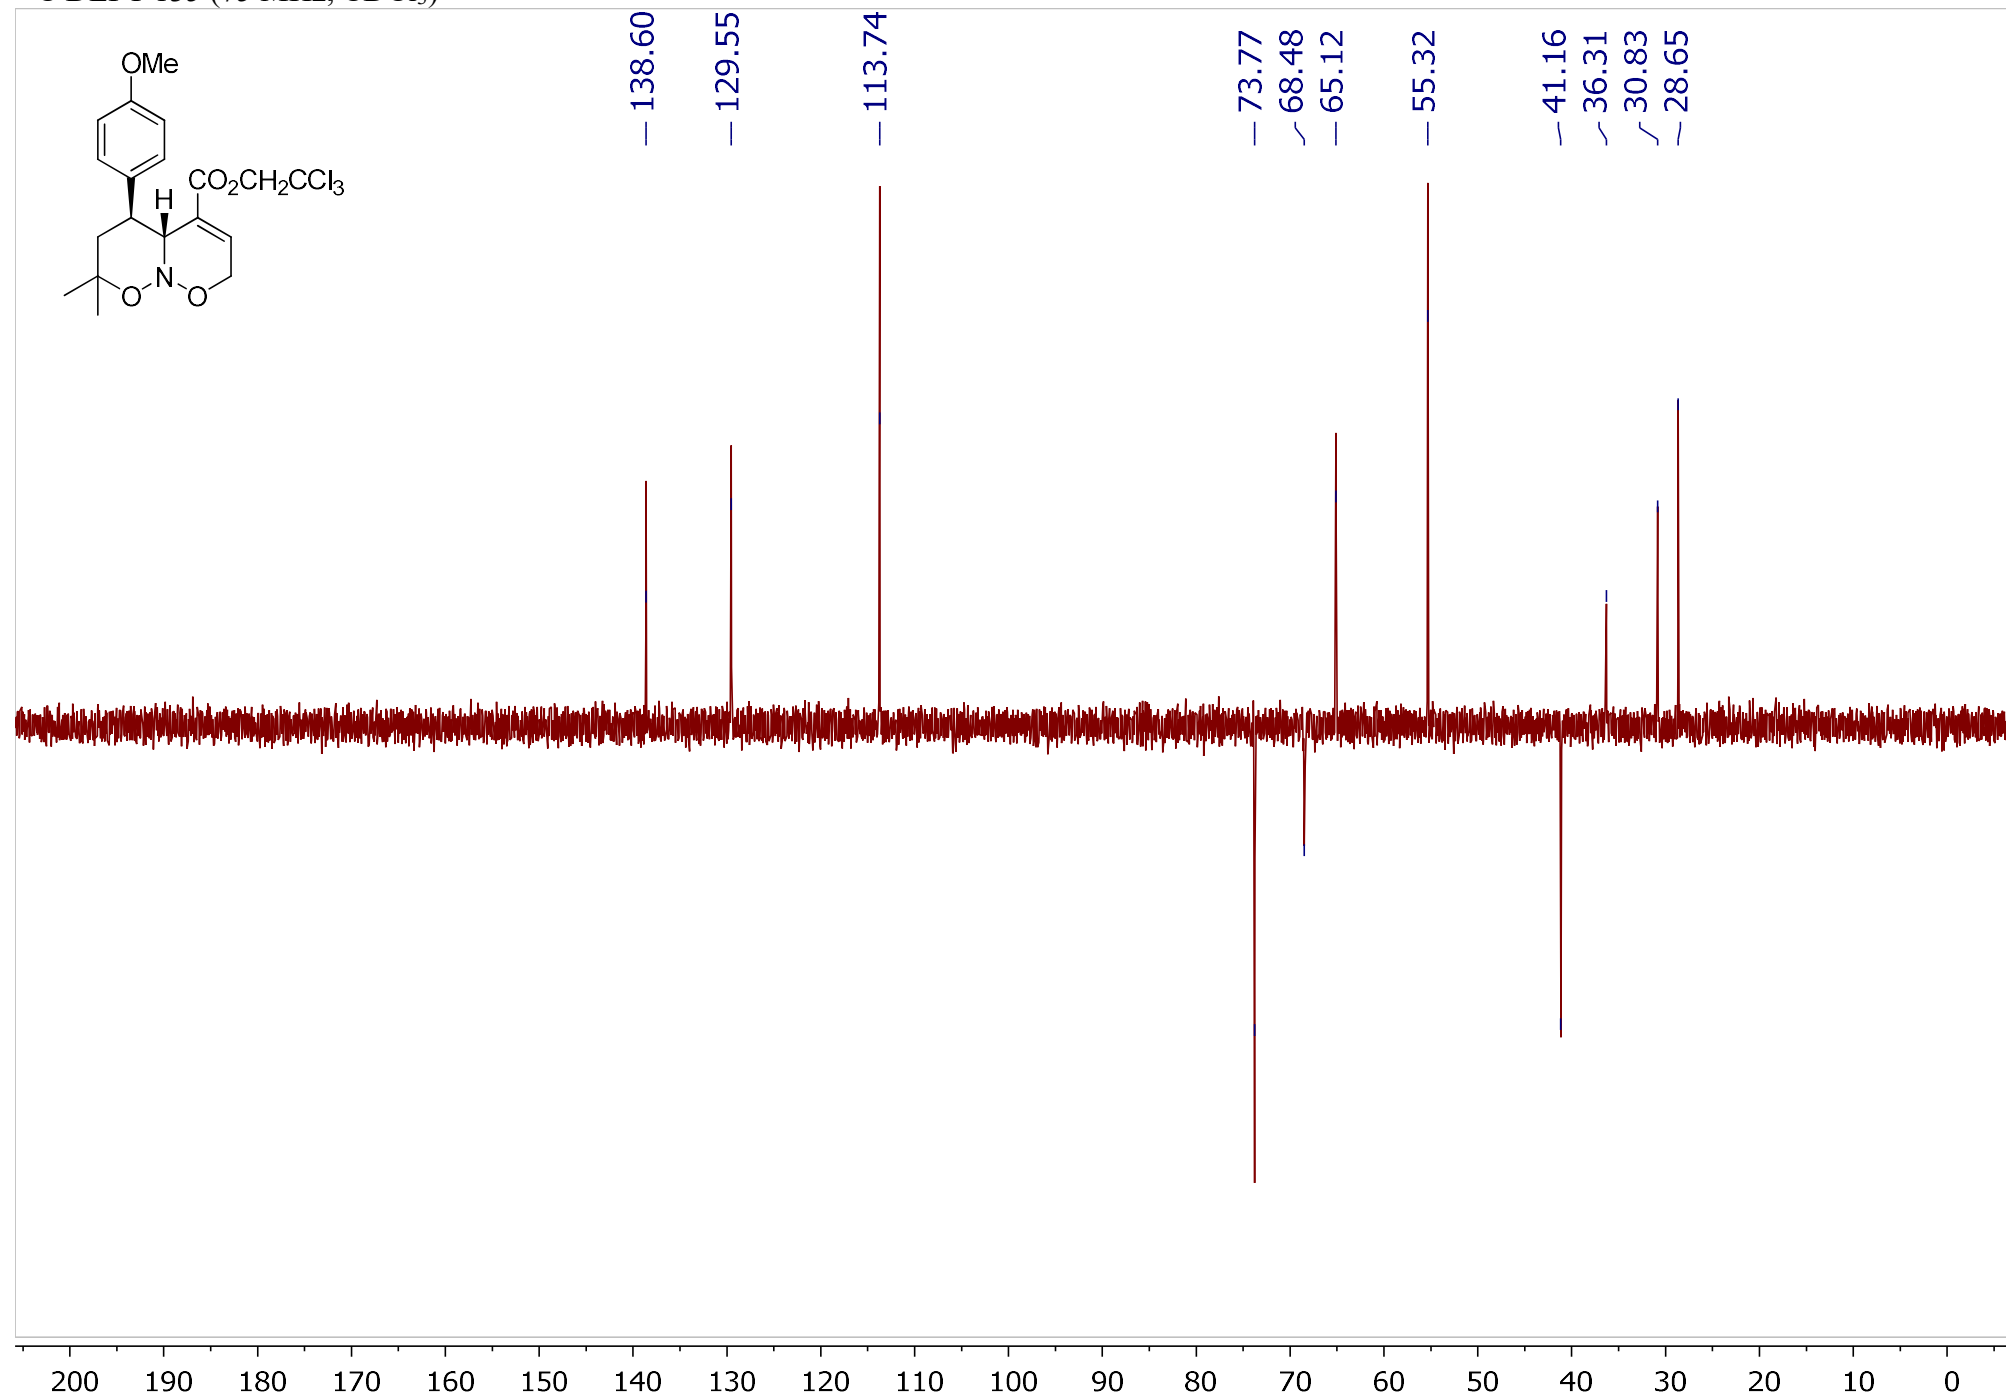

**Methyl (4aR\*,5S\*)-5-(4-methoxyphenyl)-7,7-dimethyl-4a,5,6,7-tetrahydro-2H-[1,2]oxazino[2,3-b][1,2]oxazine-4-carboxylate 3b**

$^1\text{H}$  NMR (300 MHz,  $\text{CDCl}_3$ )

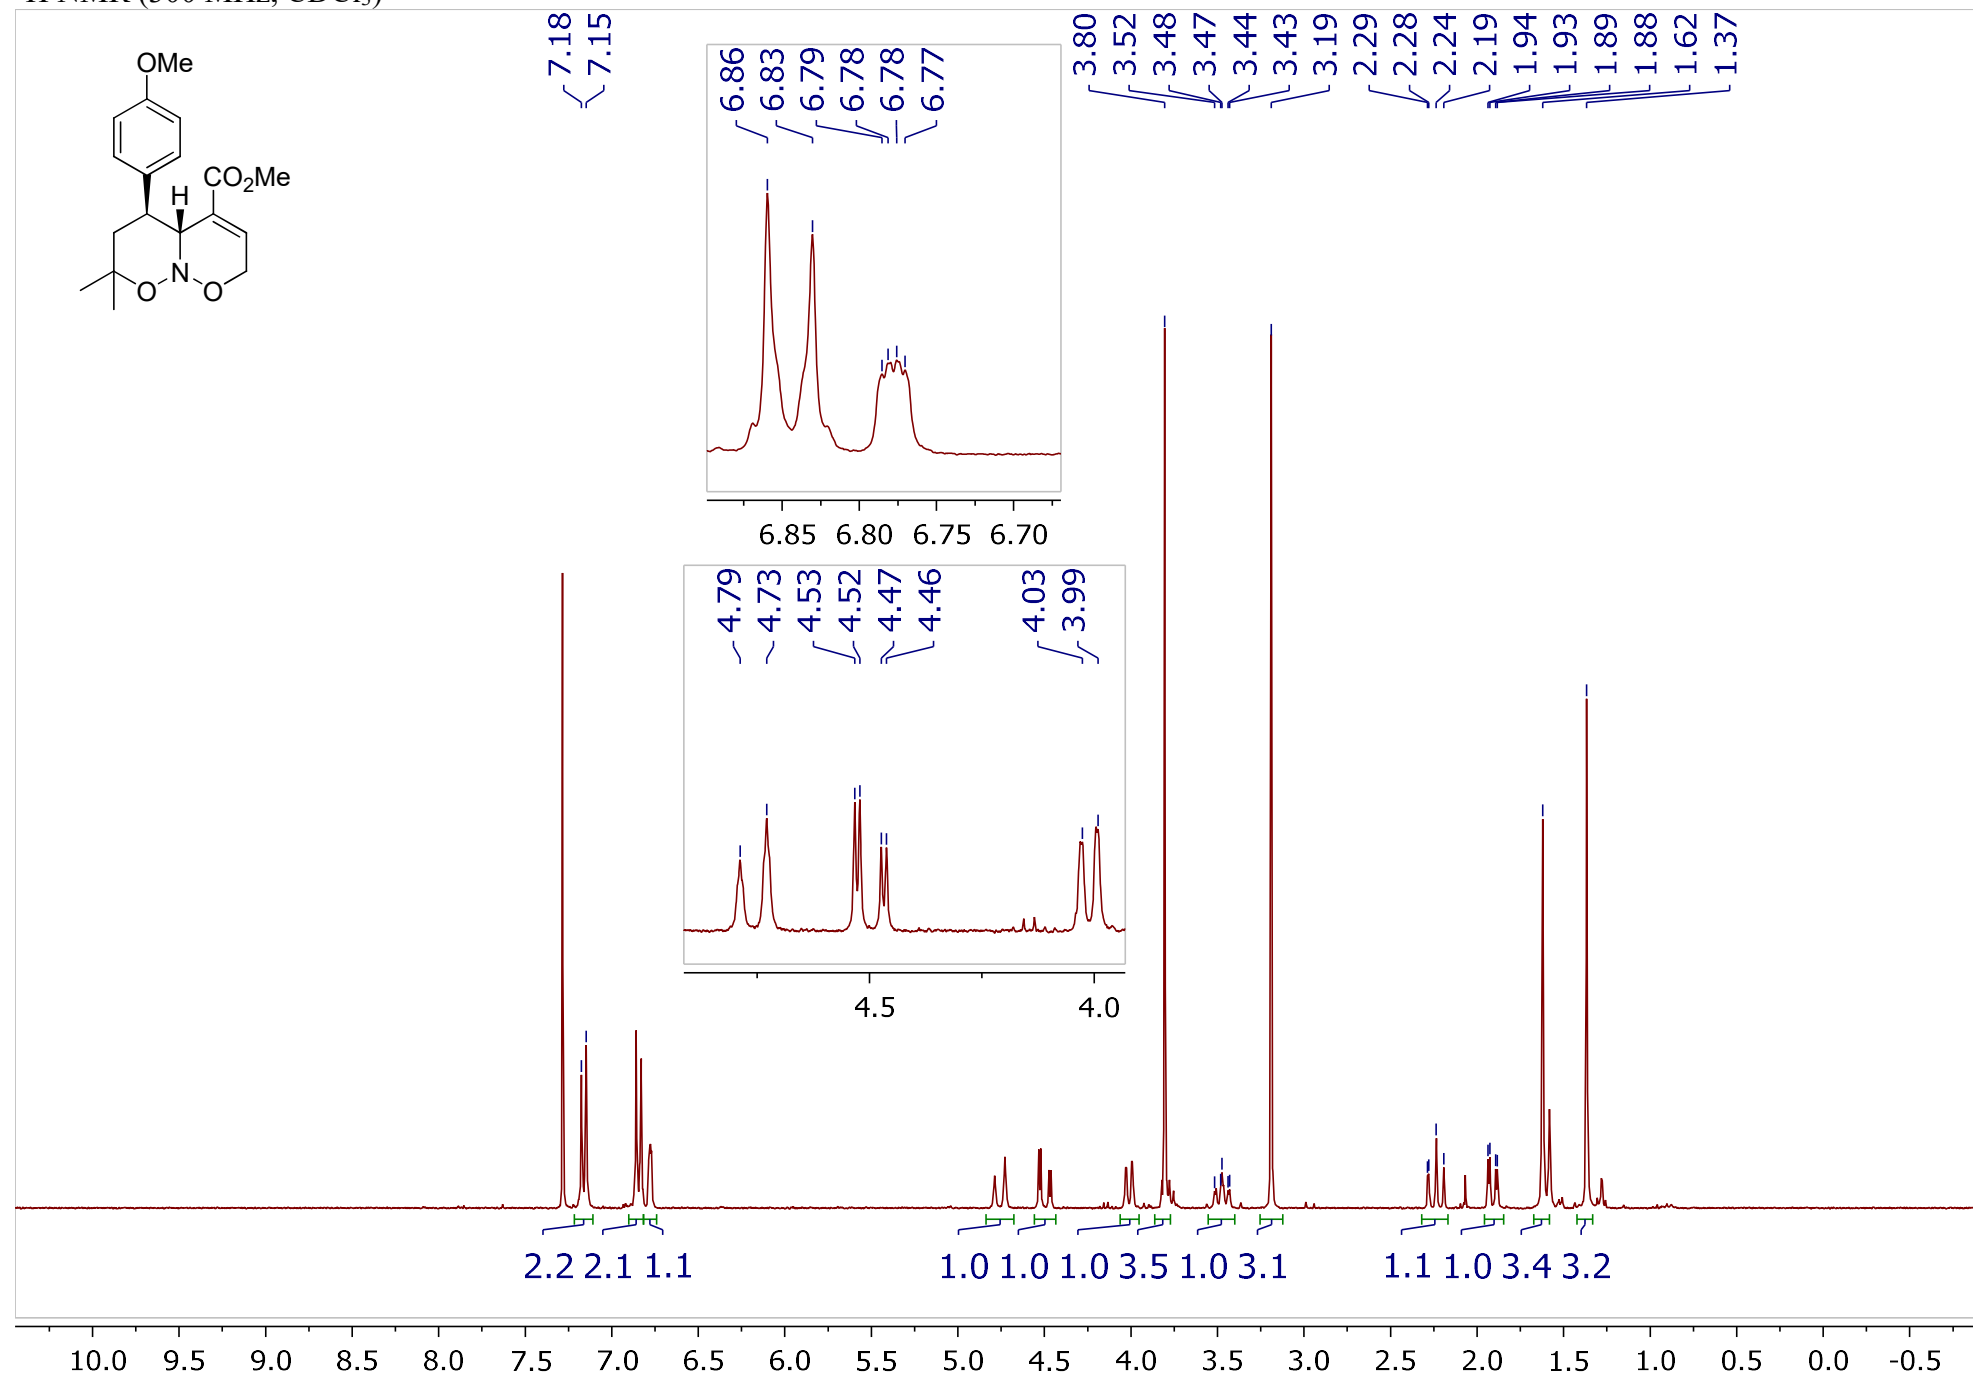

$^{13}\text{C}$  NMR (75 MHz,  $\text{CDCl}_3$ )

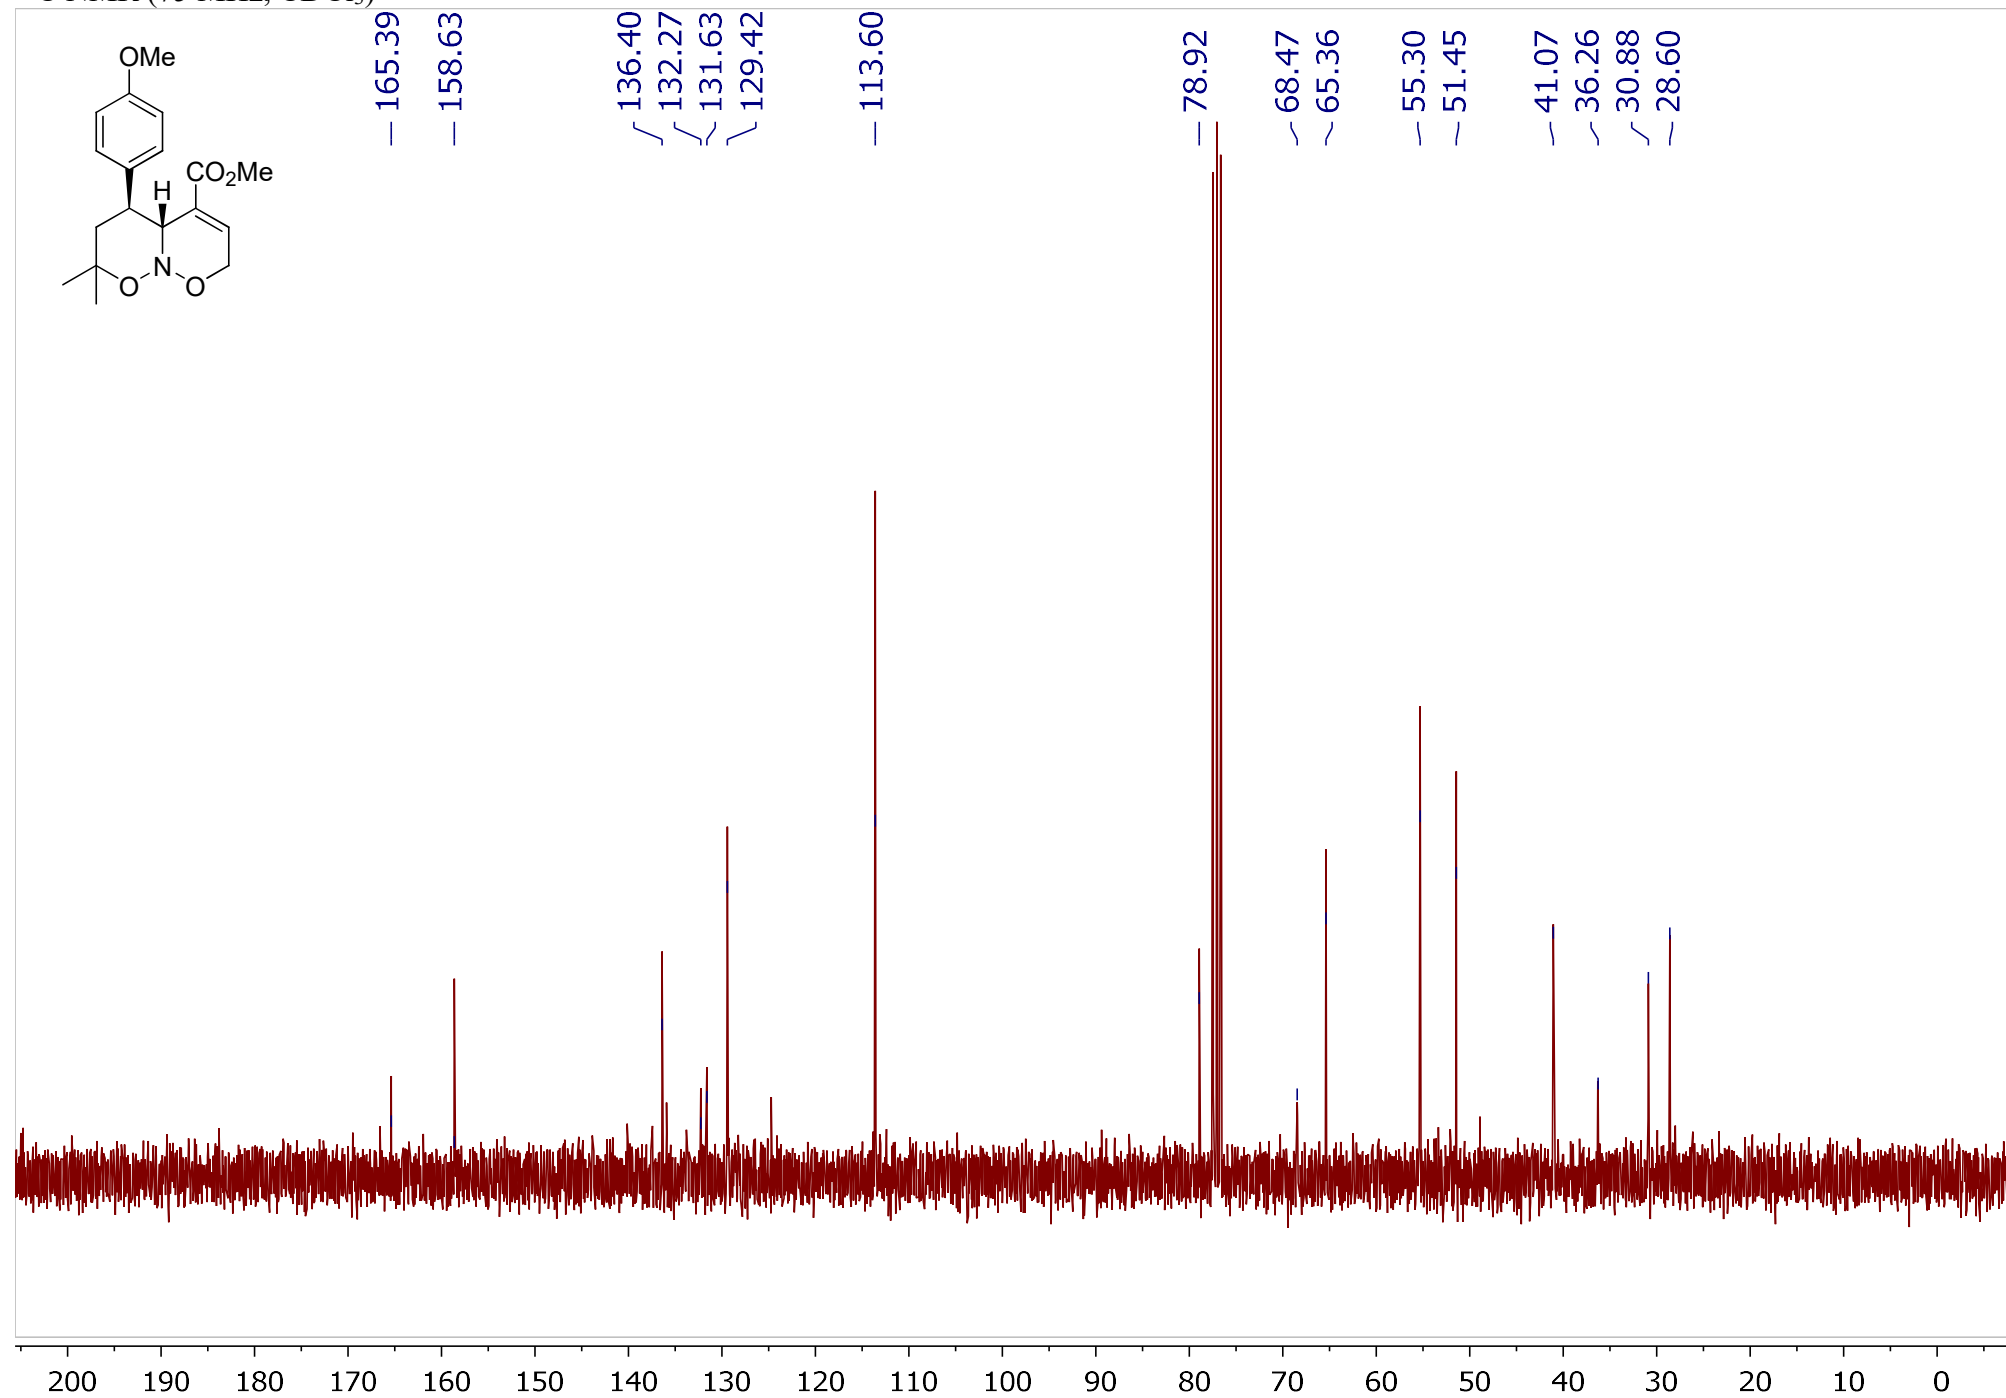

$^{13}\text{C}$  DEPT 135 (75 MHz,  $\text{CDCl}_3$ )

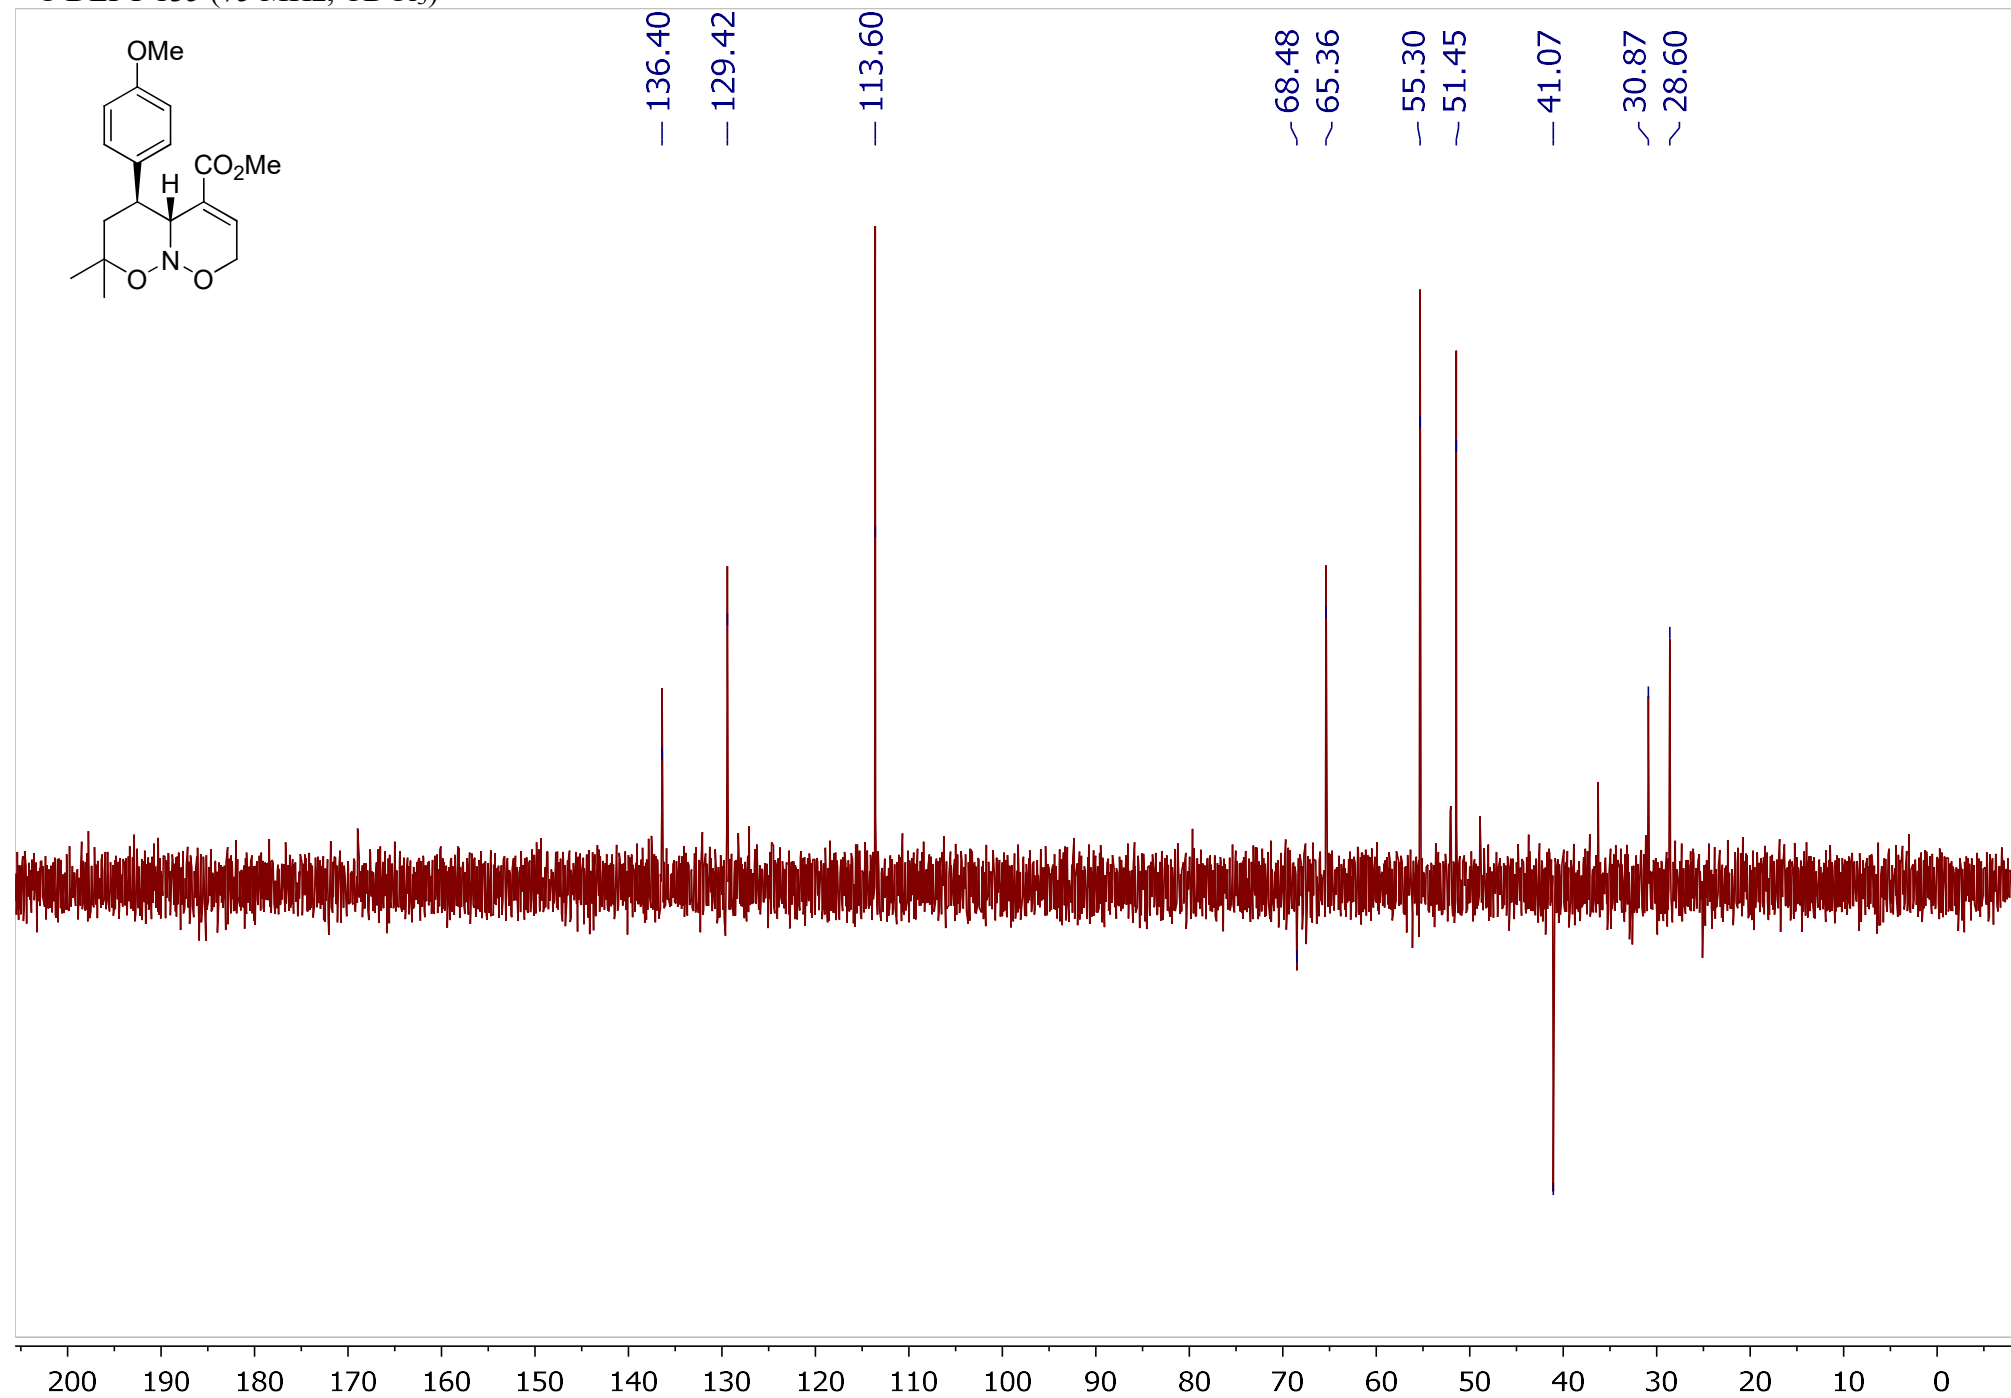



$^1\text{H}$ - $^1\text{H}$  COSY

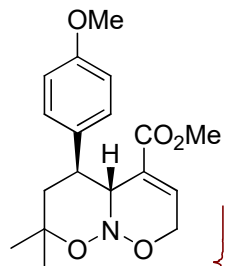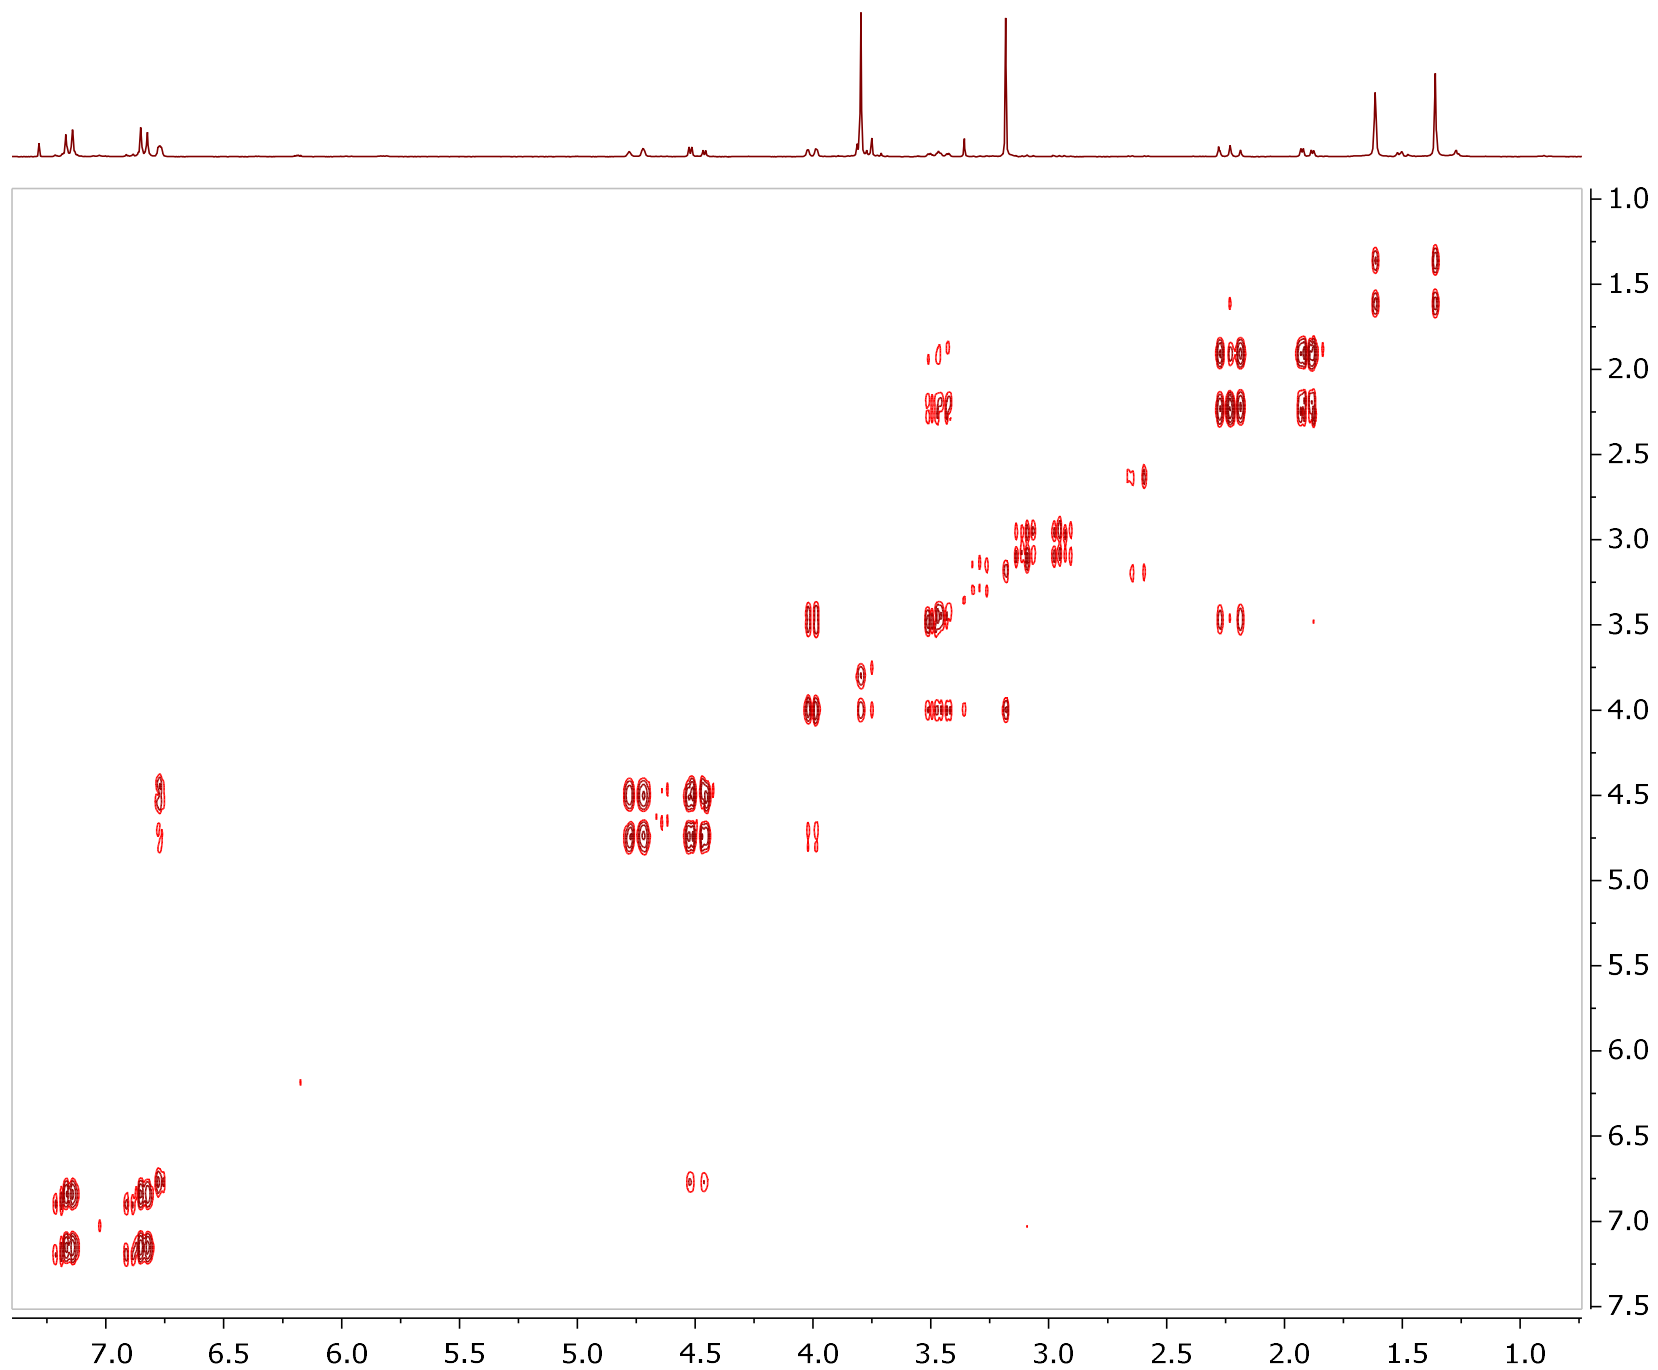

$^1\text{H}$ - $^{13}\text{C}$  HSQC

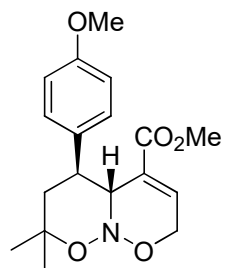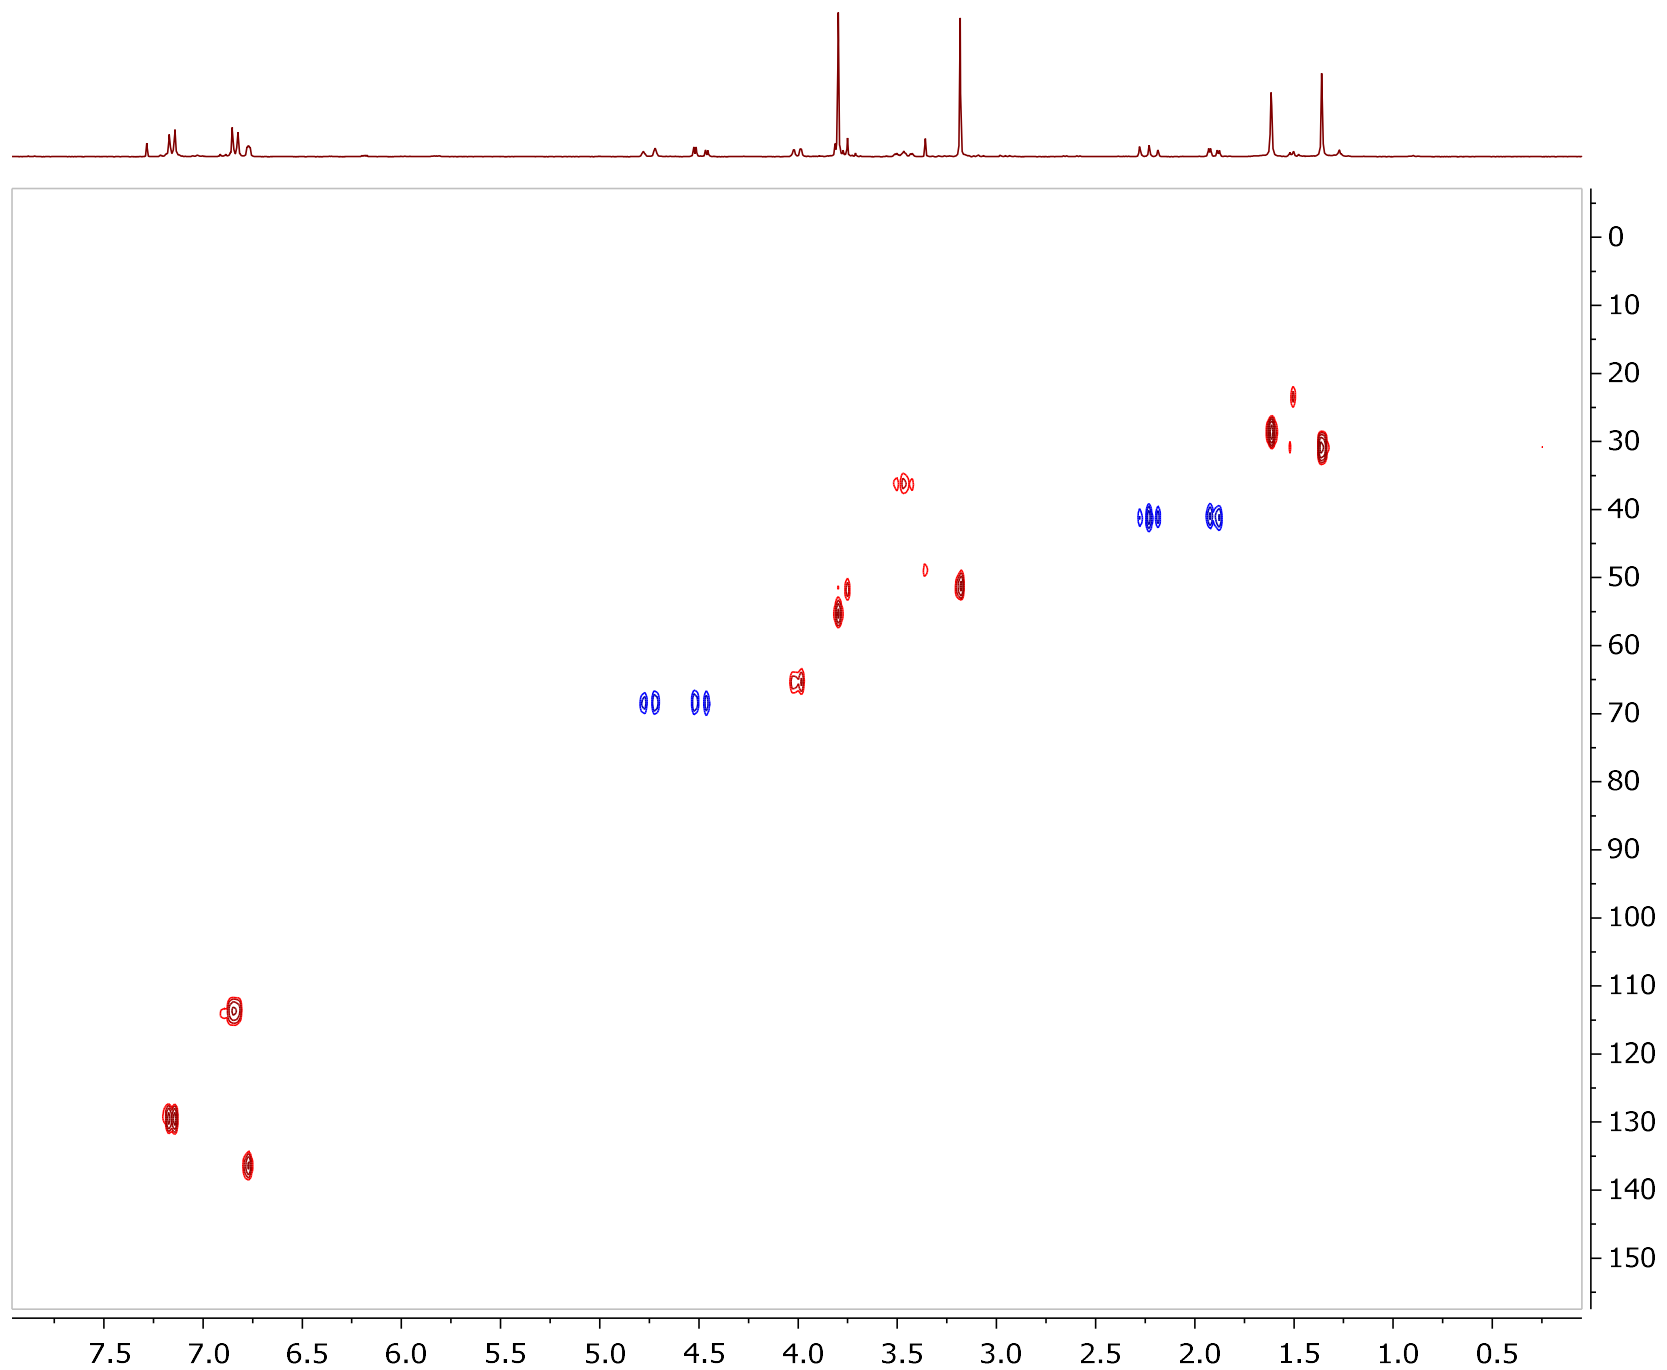

$^1\text{H}$ - $^{13}\text{C}$  HMBC

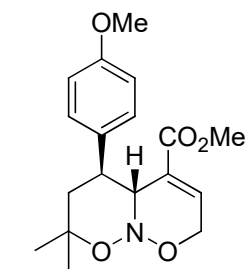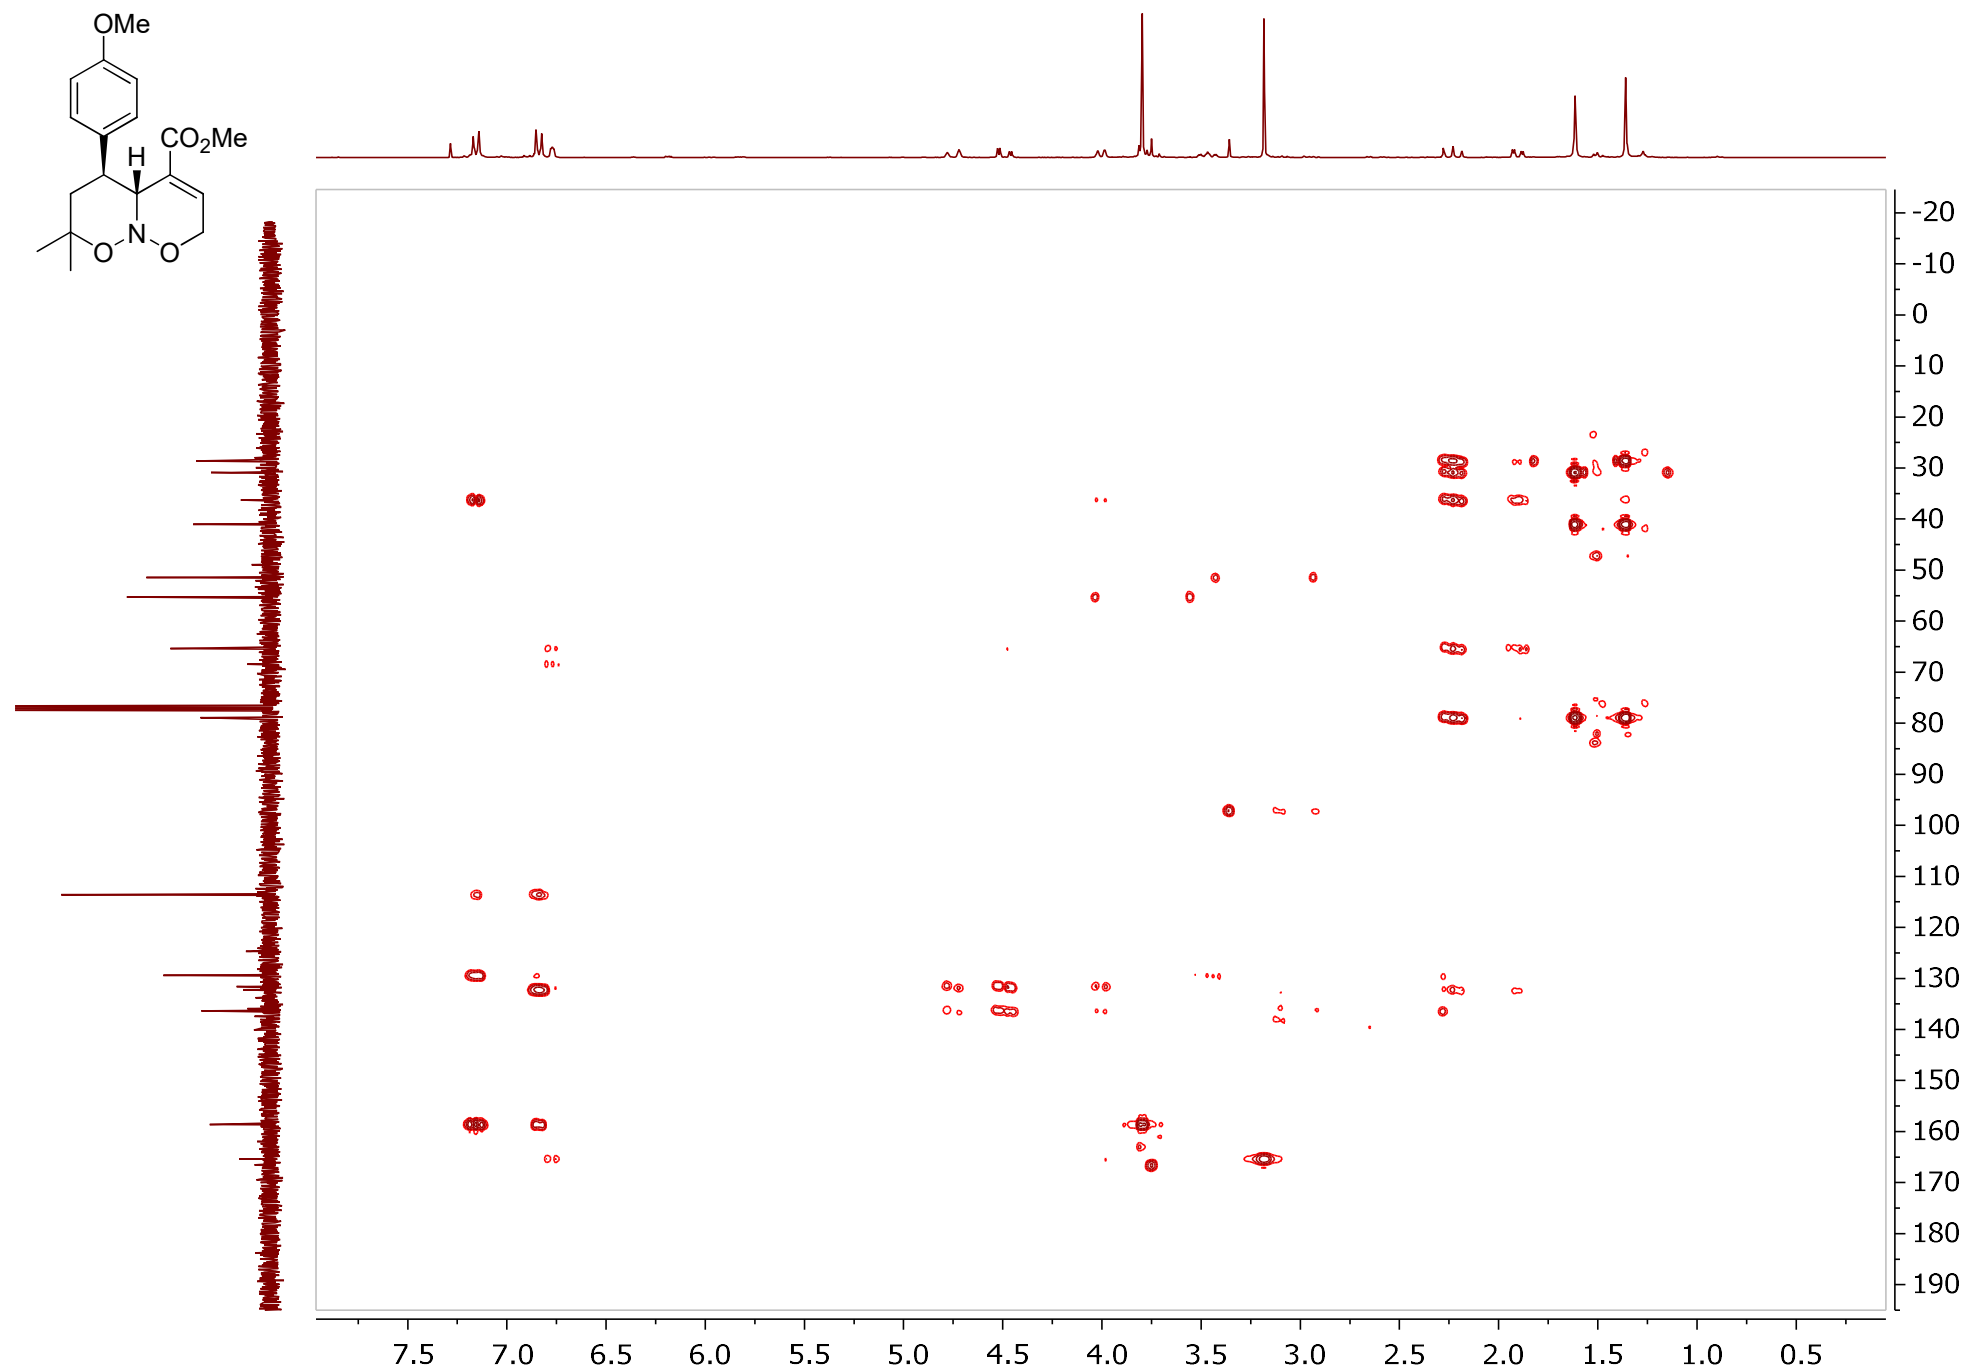

$^1\text{H}$ - $^1\text{H}$  NOESY

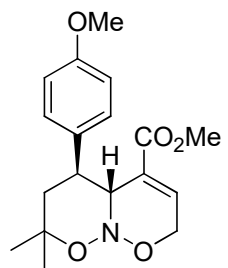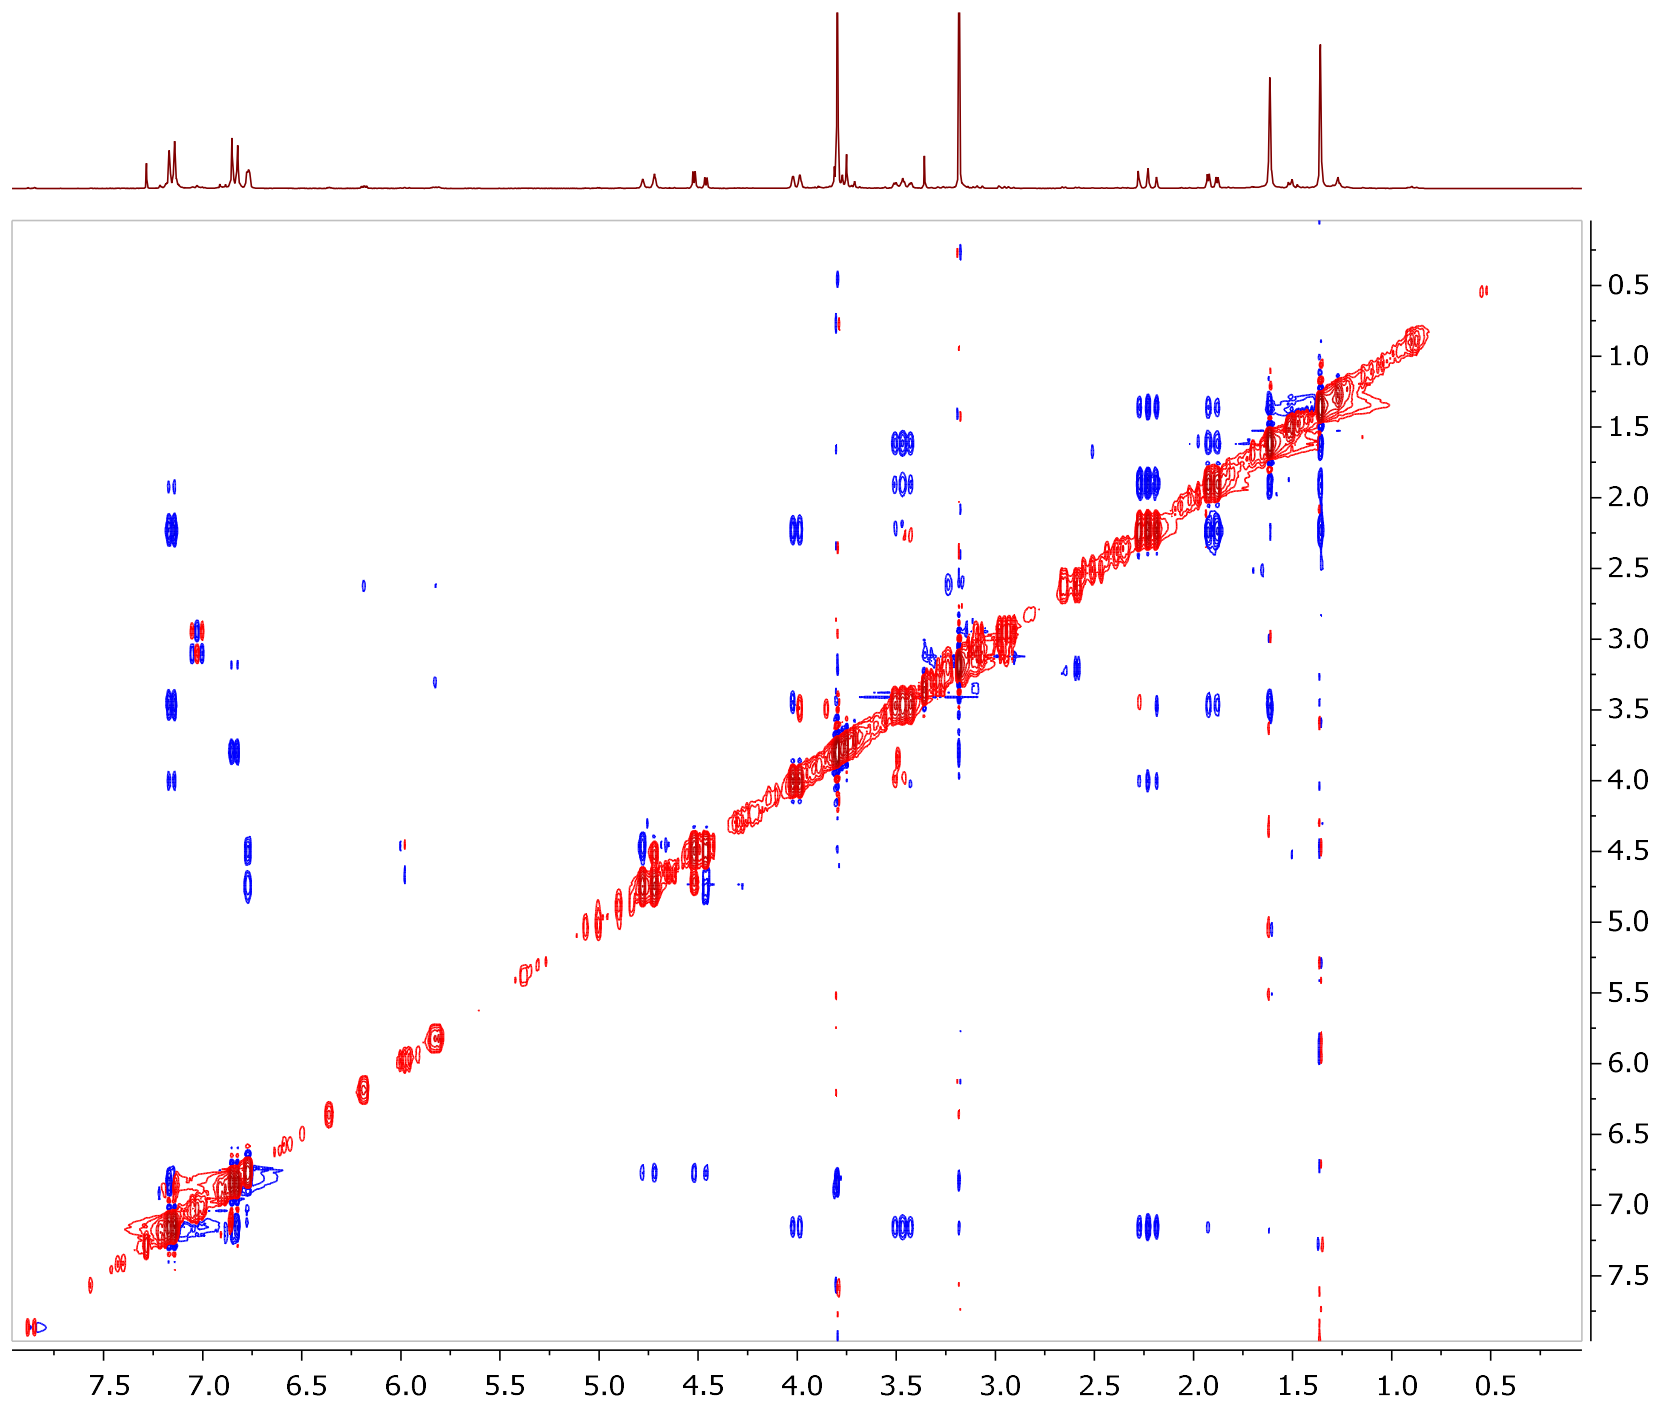

**4-Ethyl (4aR\*,5S\*)-5-(4-methoxyphenyl)-7,7-dimethyl-4a,5,6,7-tetrahydro-2H-[1,2]oxazino[2,3-b][1,2]oxazine-4-carboxylate 3c**

<sup>1</sup>H NMR (300 MHz, CDCl<sub>3</sub>)

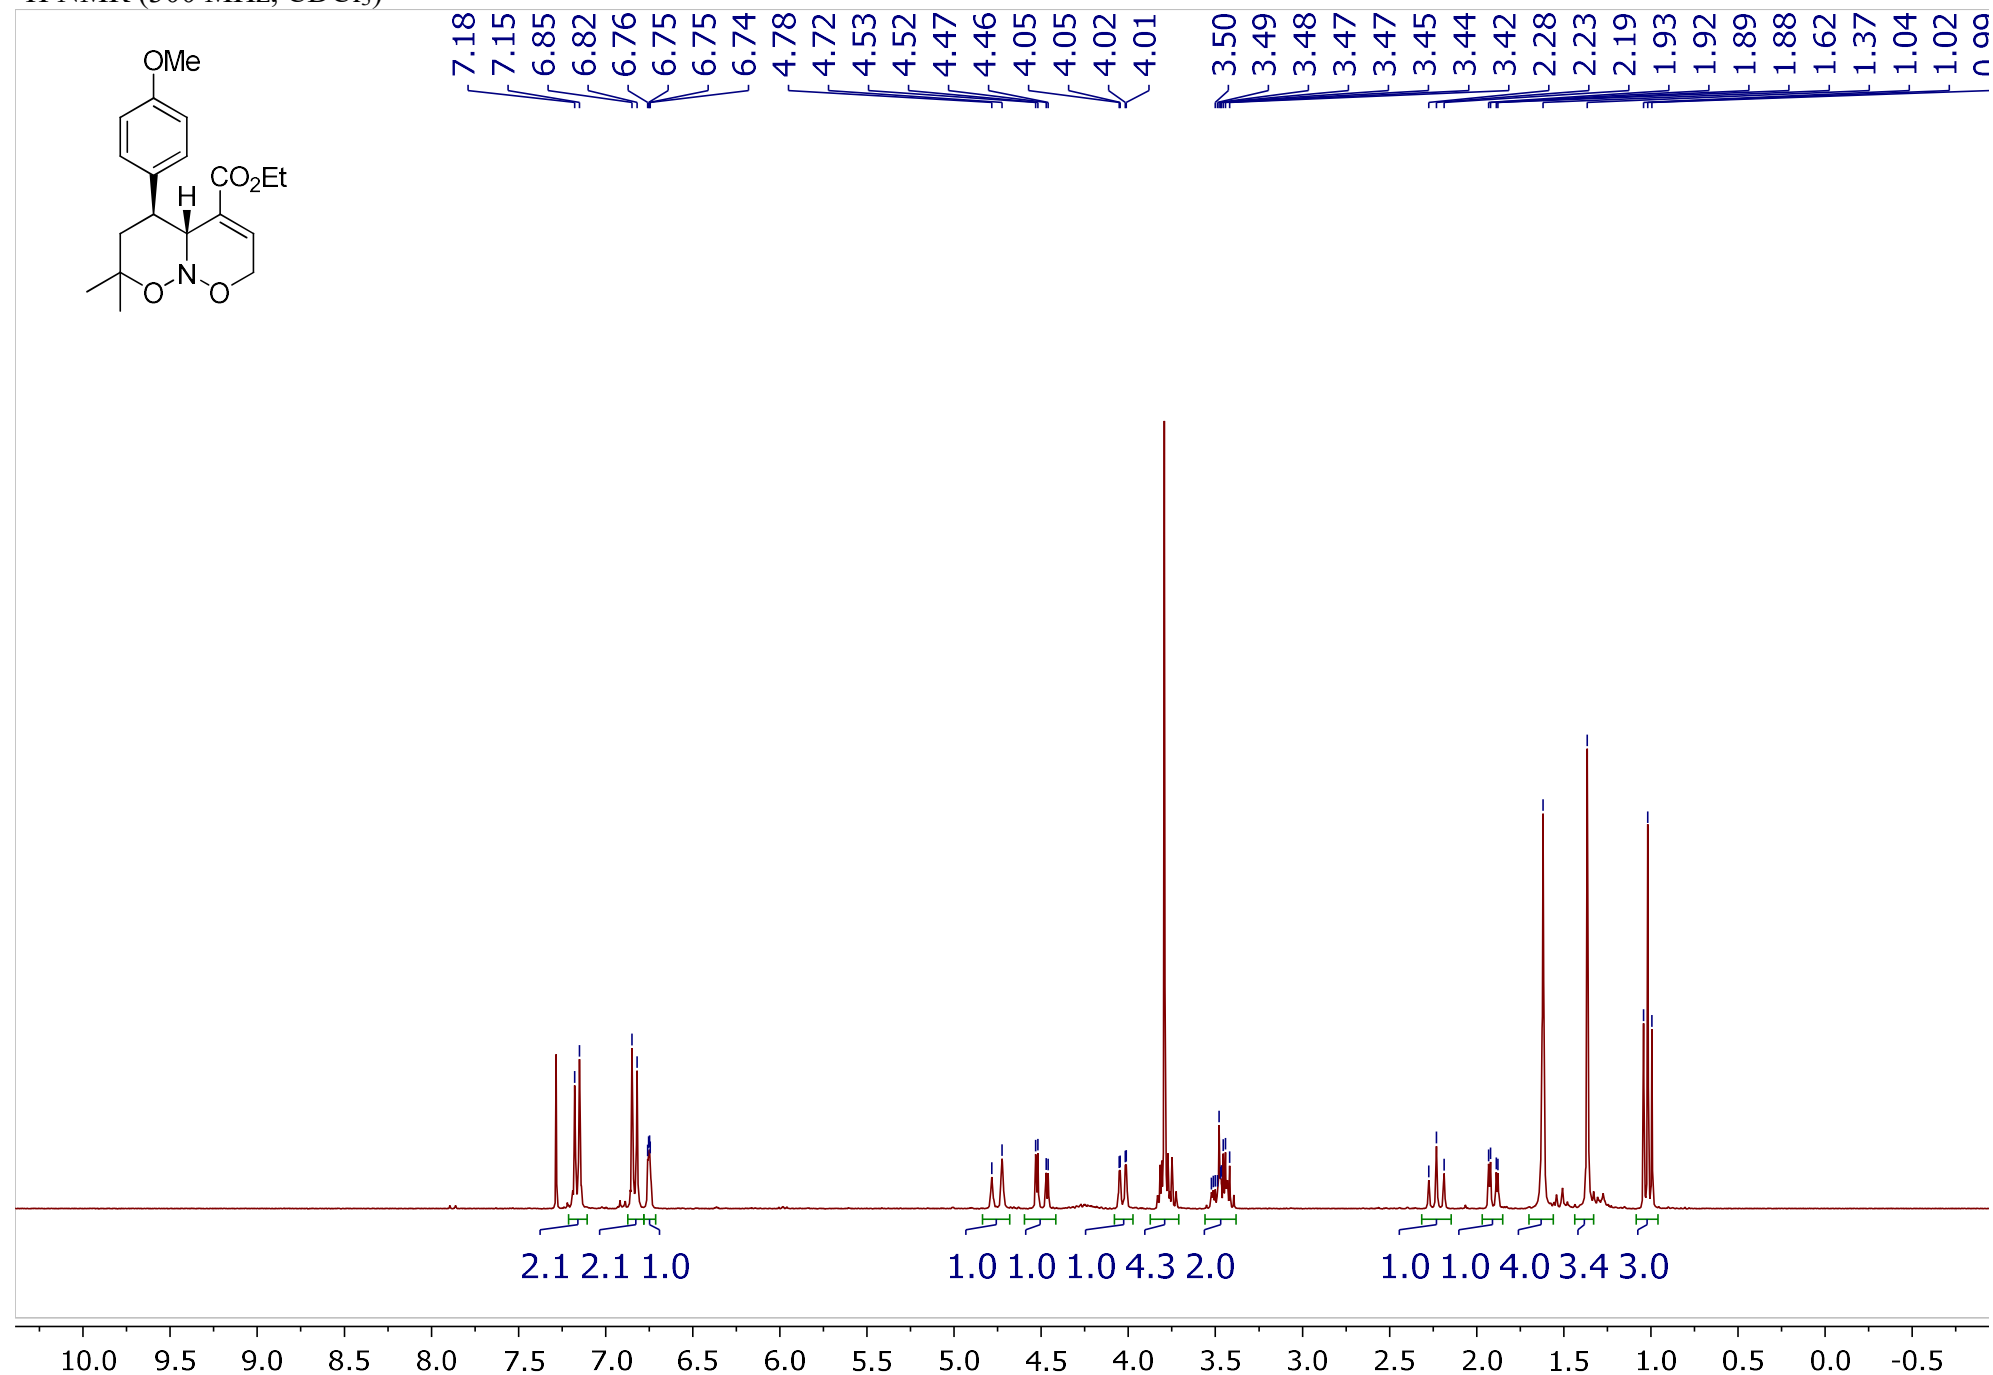

<sup>13</sup>C NMR (75 MHz, CDCl<sub>3</sub>)

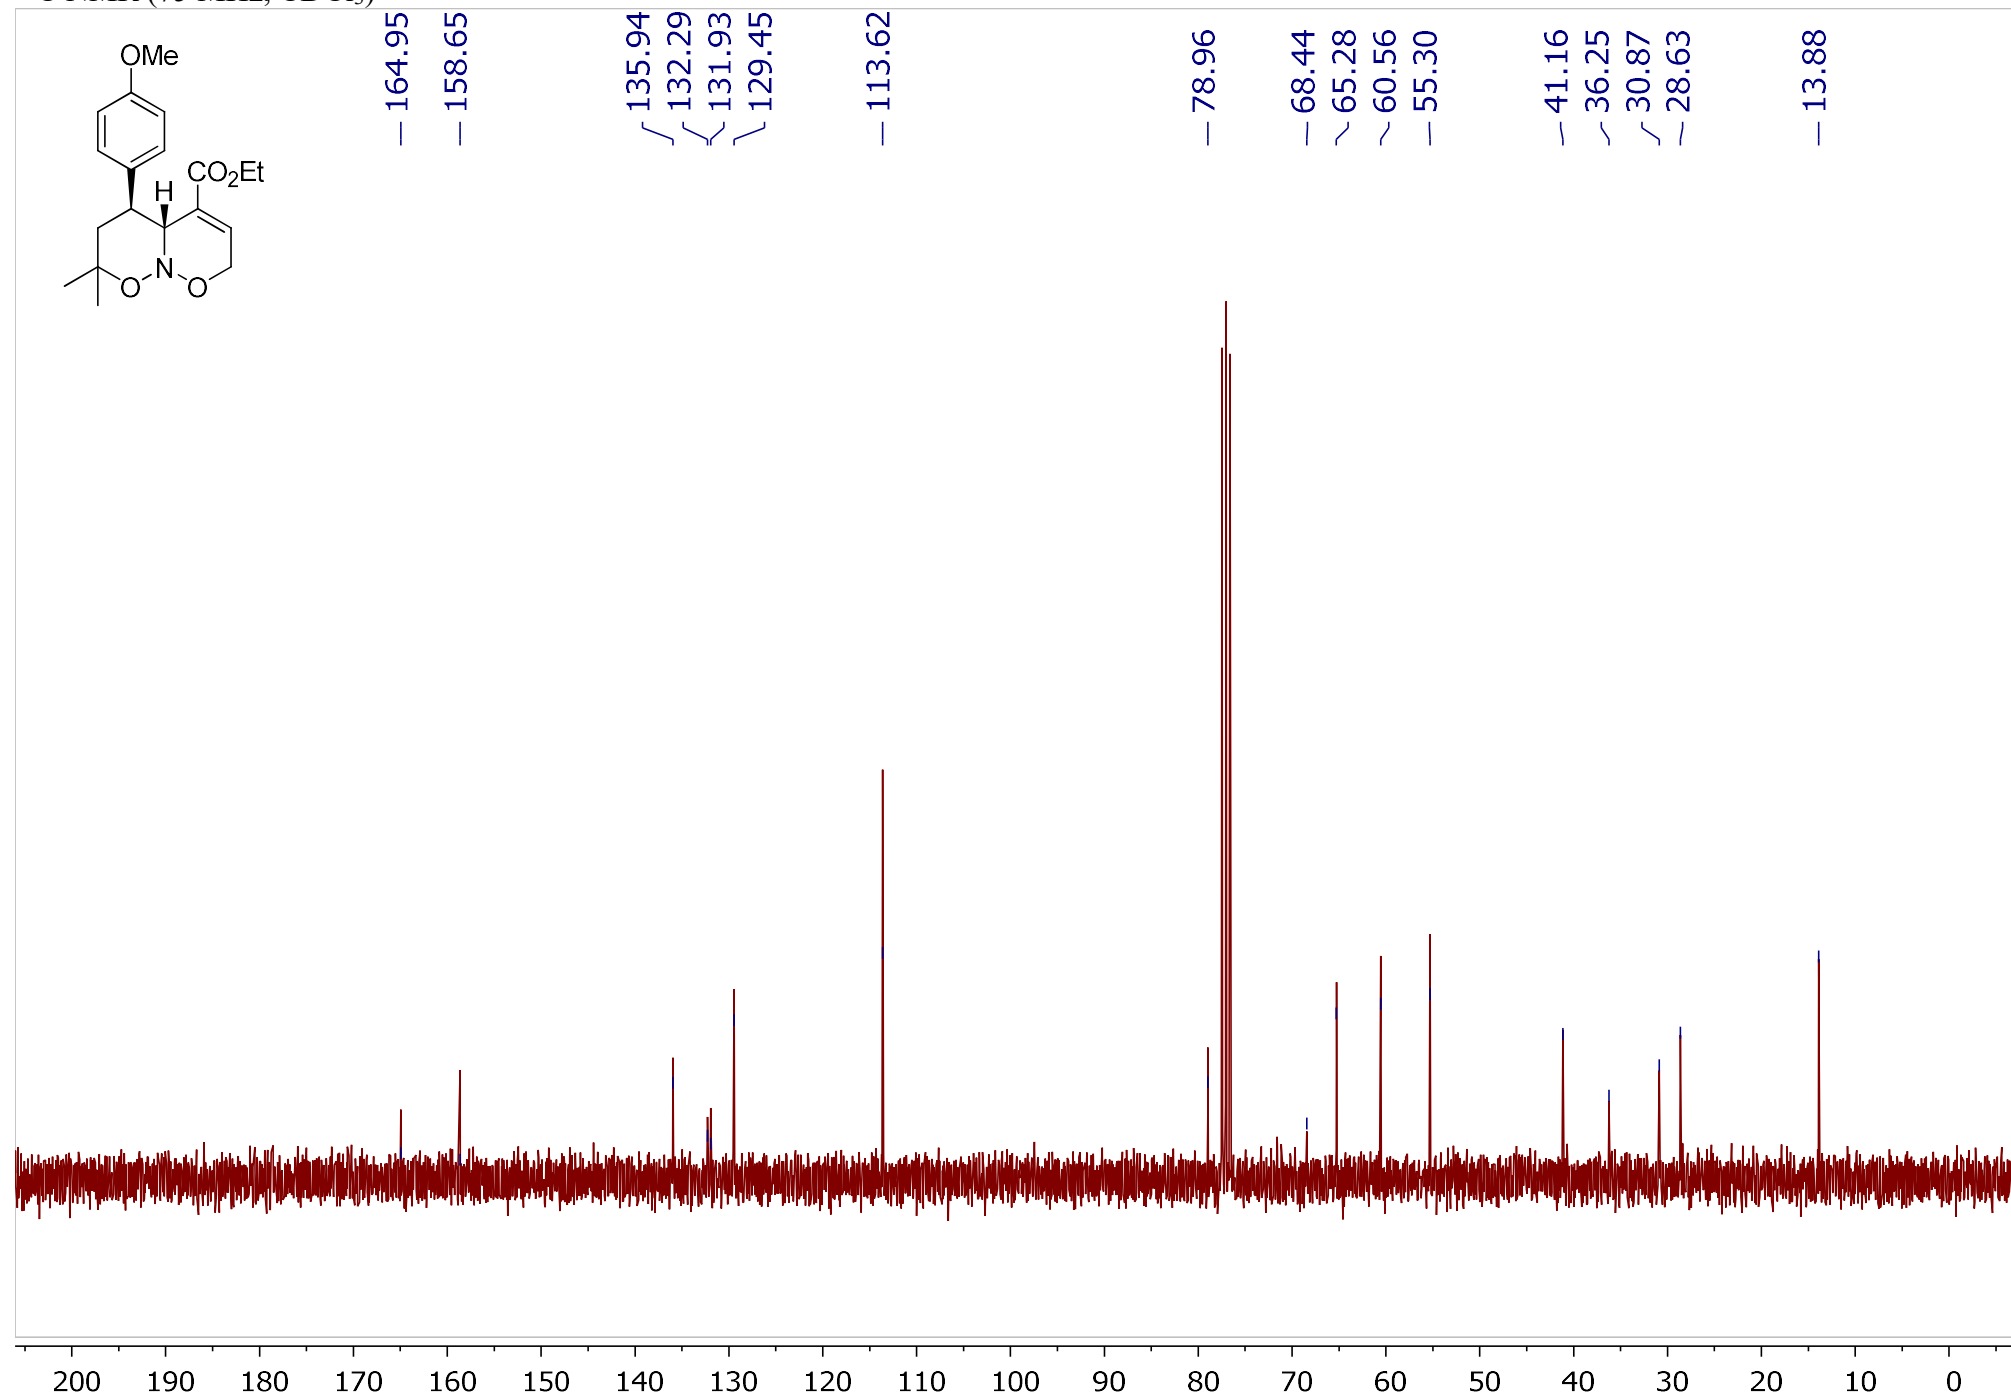

<sup>13</sup>C DEPT 135 (75 MHz, CDCl<sub>3</sub>)

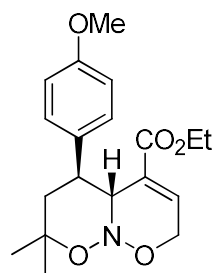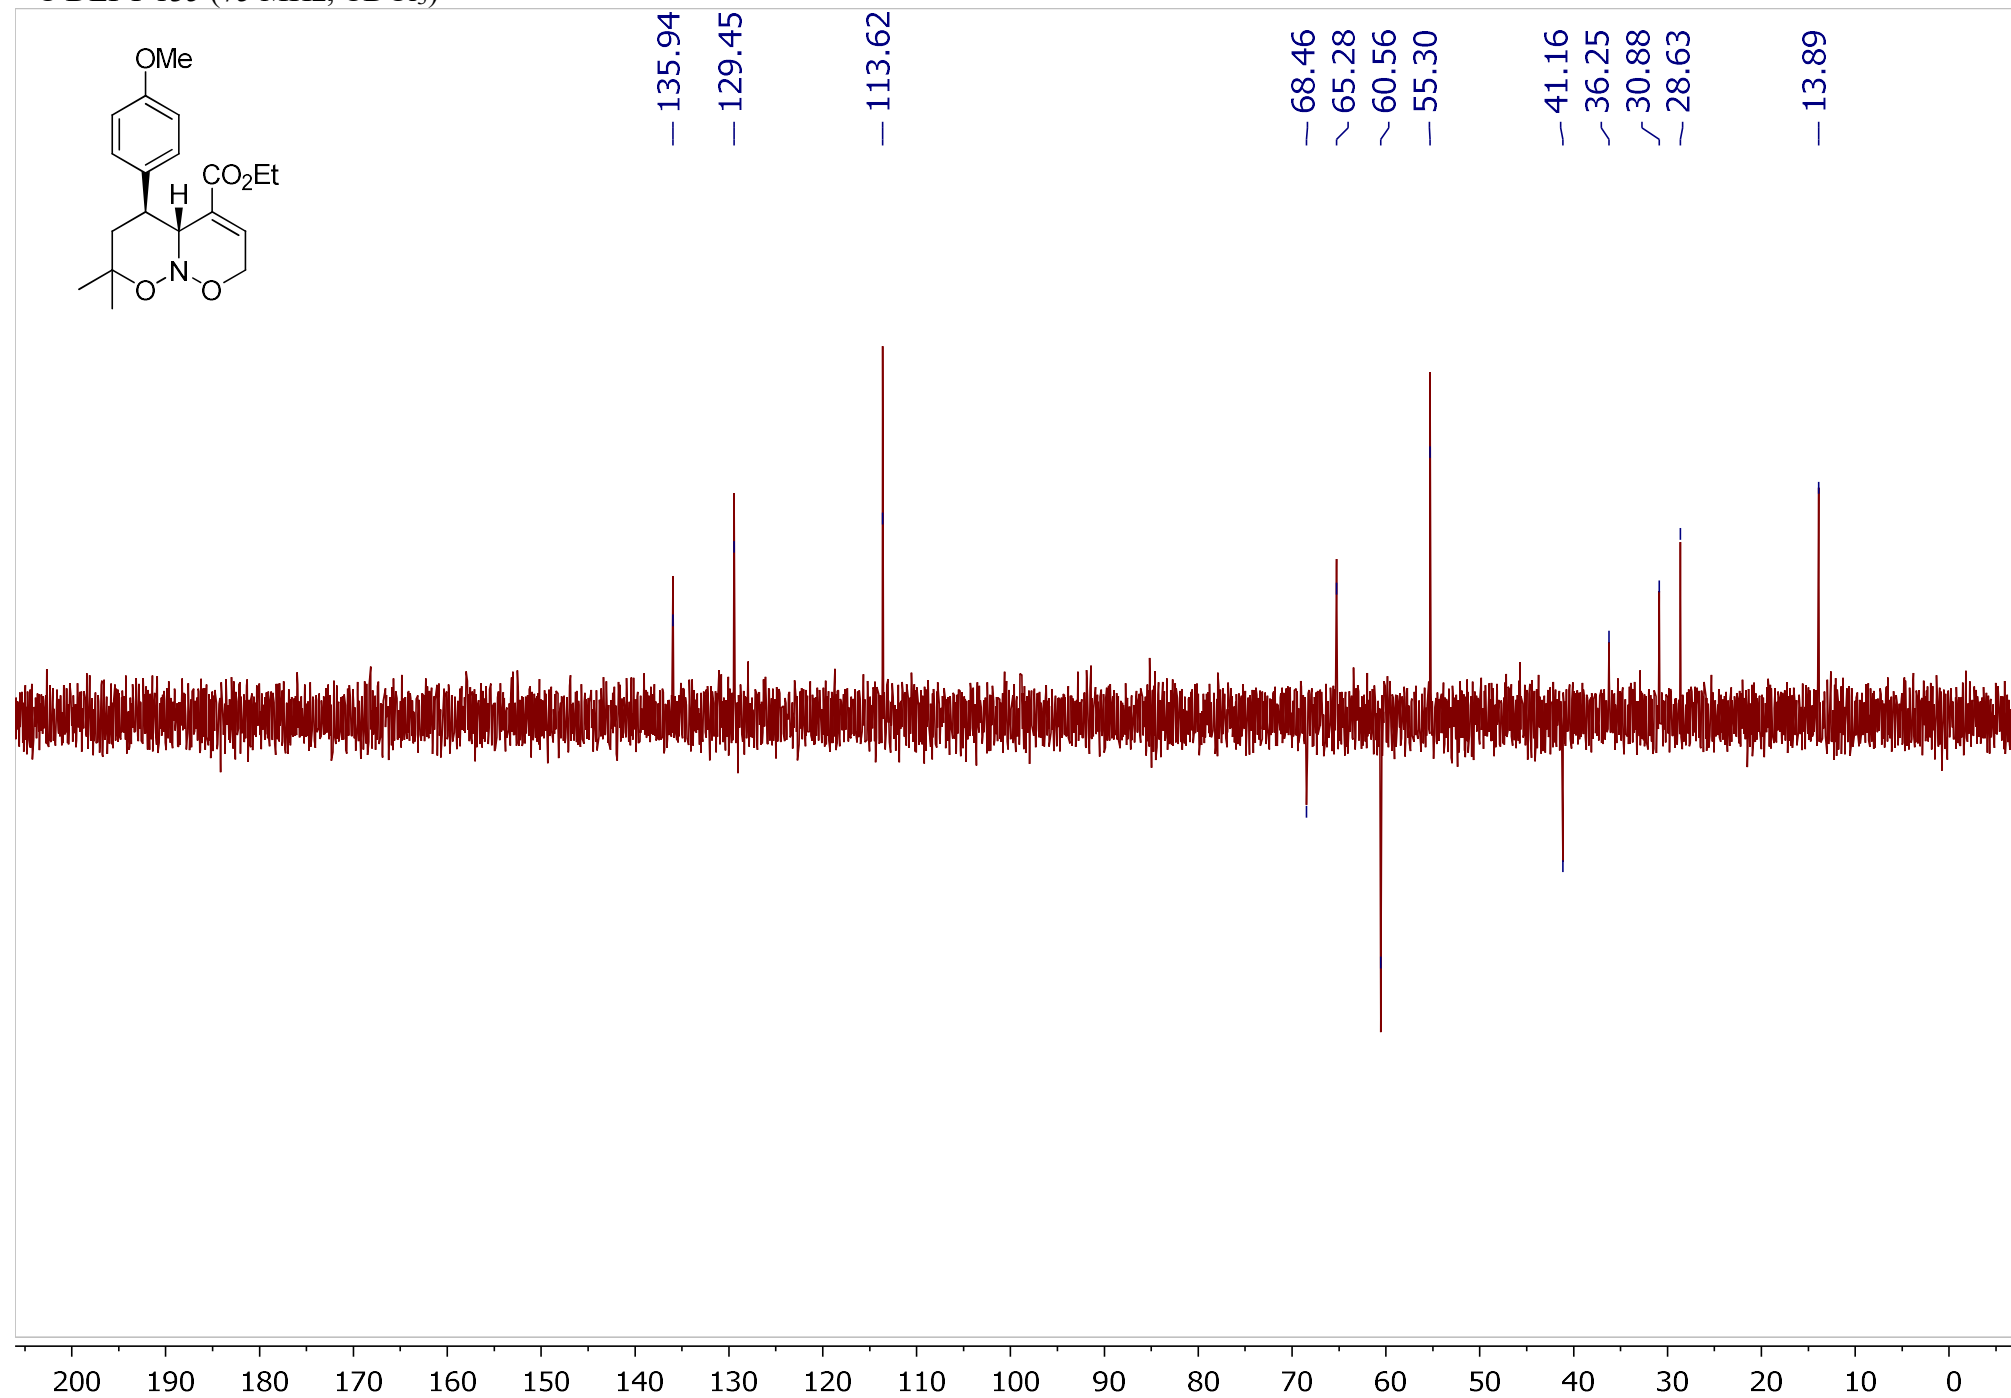

**Benzyl (4aR\*,5S\*)-5-(4-methoxyphenyl)-7,7-dimethyl-4a,5,6,7-tetrahydro-2H-[1,2]oxazino[2,3-b][1,2]oxazine-4-carboxylate 3d**

$^1\text{H}$  NMR (300 MHz,  $\text{CDCl}_3$ )

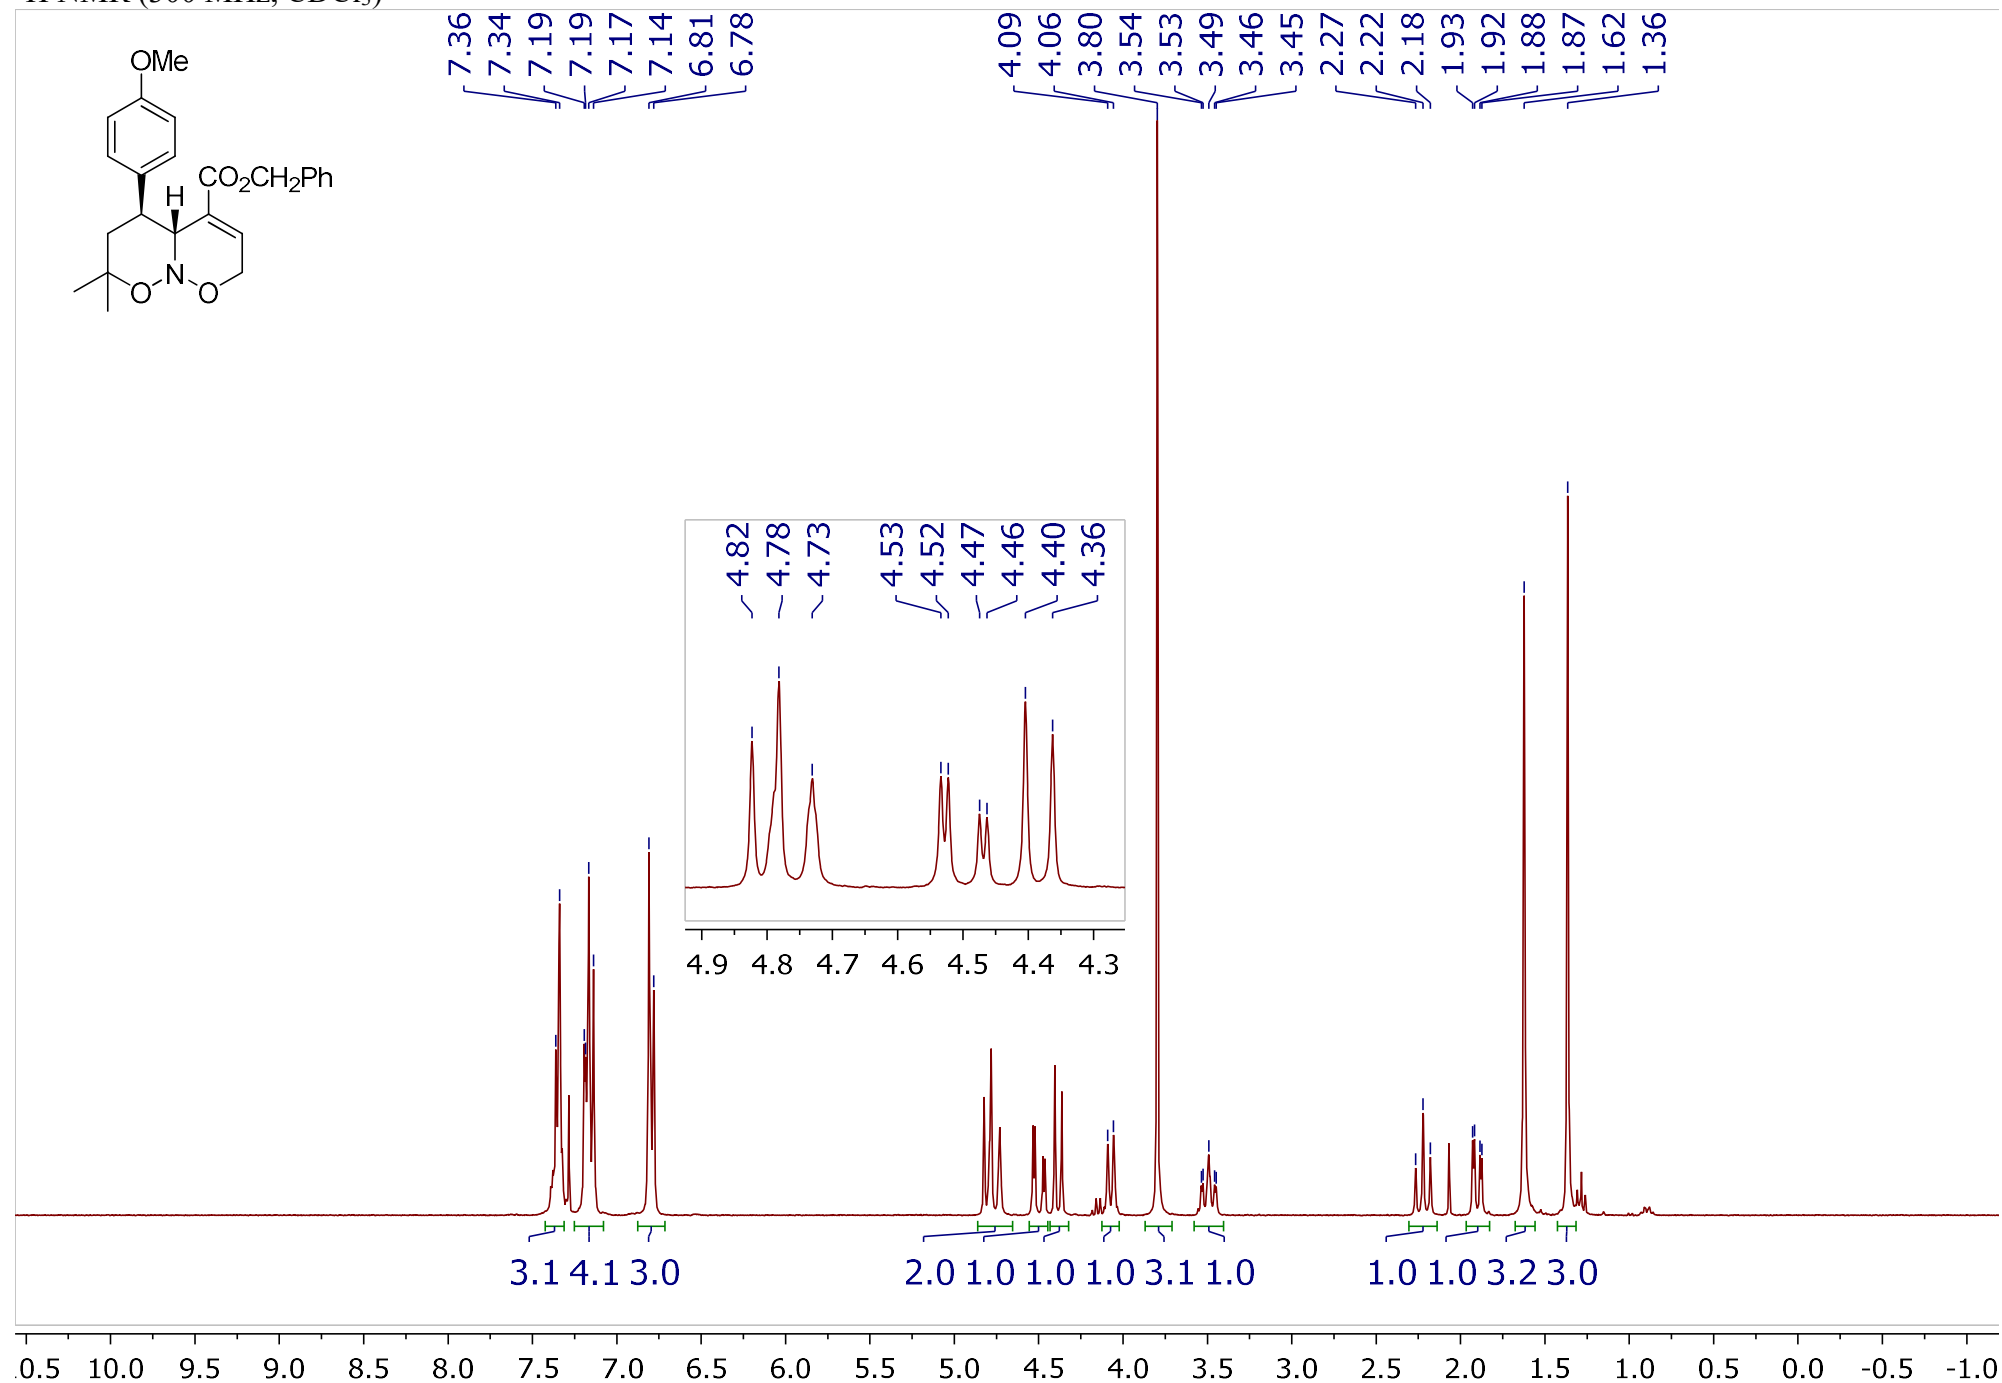



<sup>13</sup>C NMR (75 MHz, CDCl<sub>3</sub>)

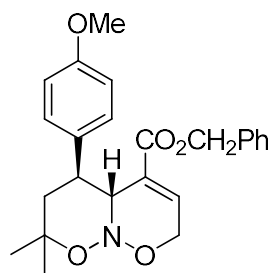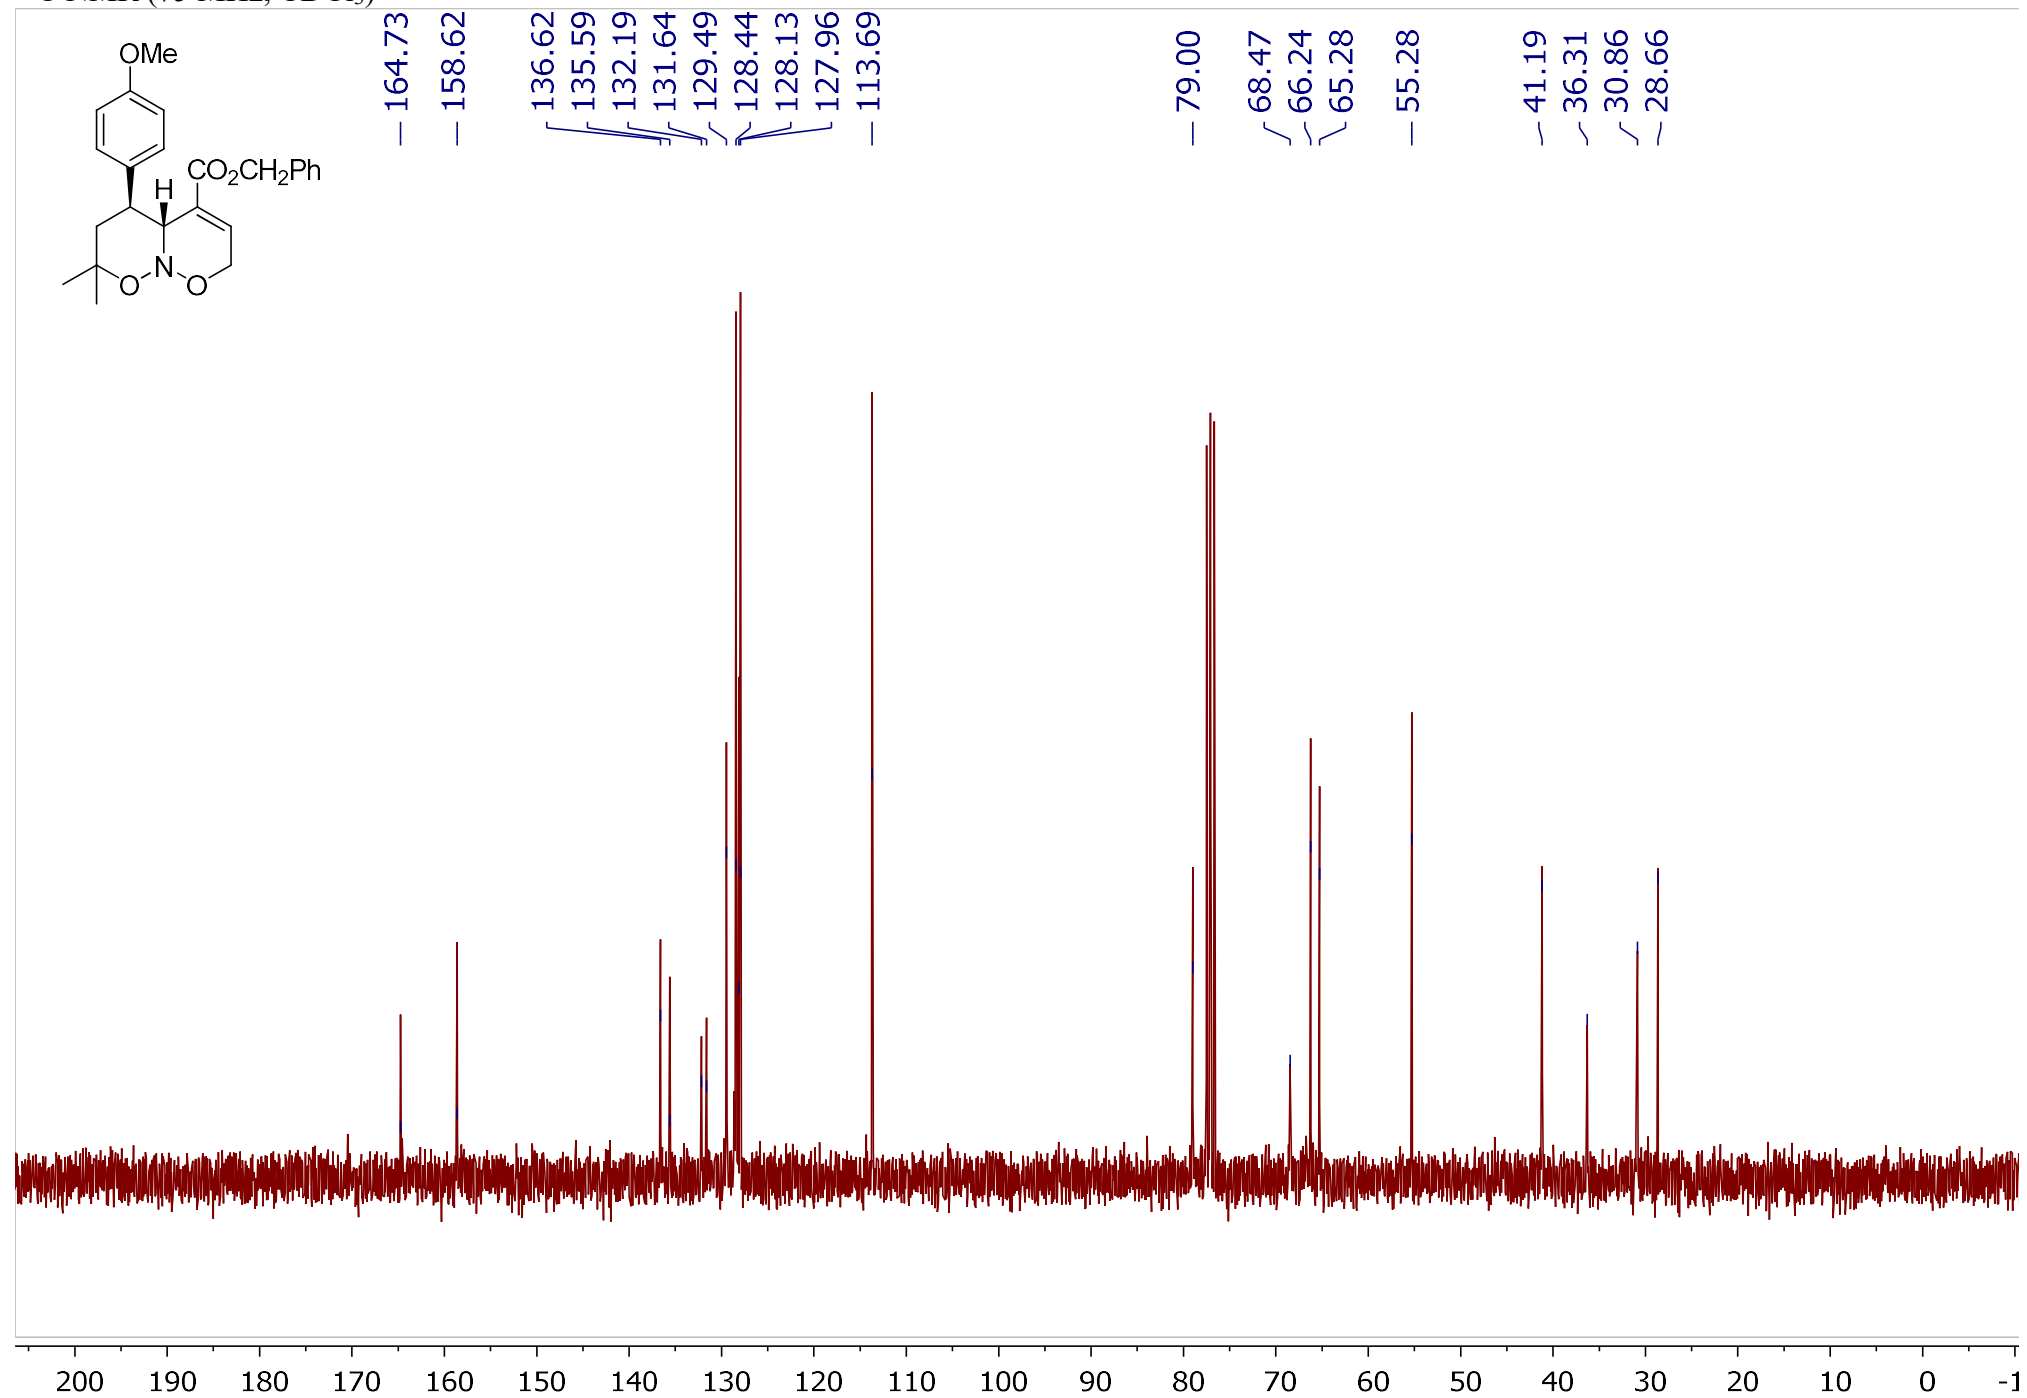

$^{13}\text{C}$  DEPT 135 (75 MHz,  $\text{CDCl}_3$ )

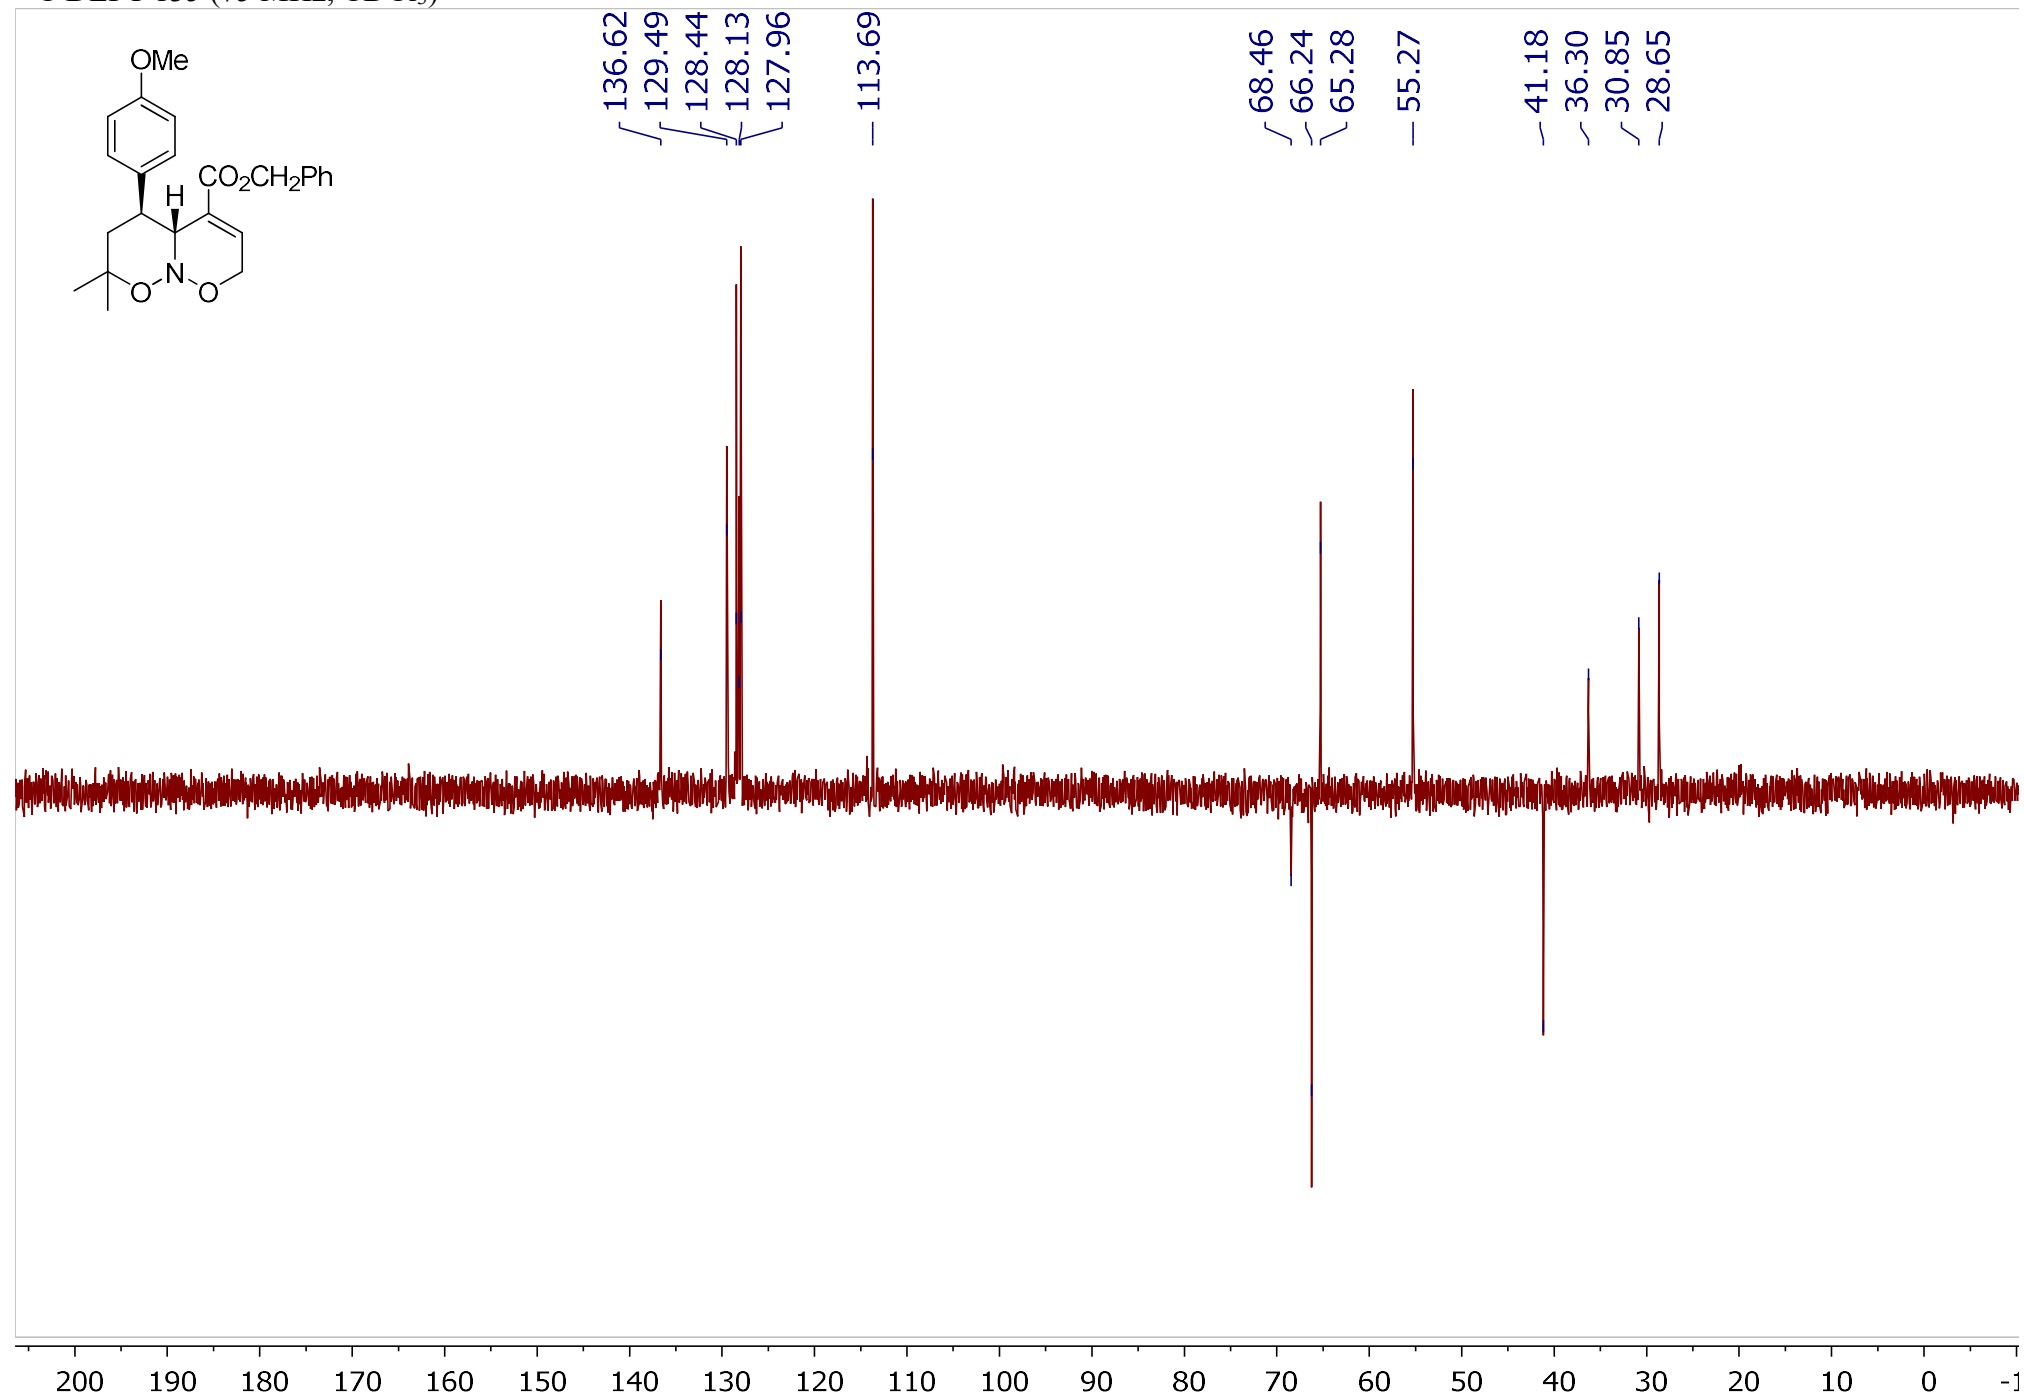

**4-Nitrobenzyl (4aR\*,5S\*)-5-(4-methoxyphenyl)-7,7-dimethyl-4a,5,6,7-tetrahydro-2H-[1,2]oxazino[2,3-b][1,2]oxazine-4-carboxylate 3e**

<sup>1</sup>H NMR (300 MHz, CDCl<sub>3</sub>)

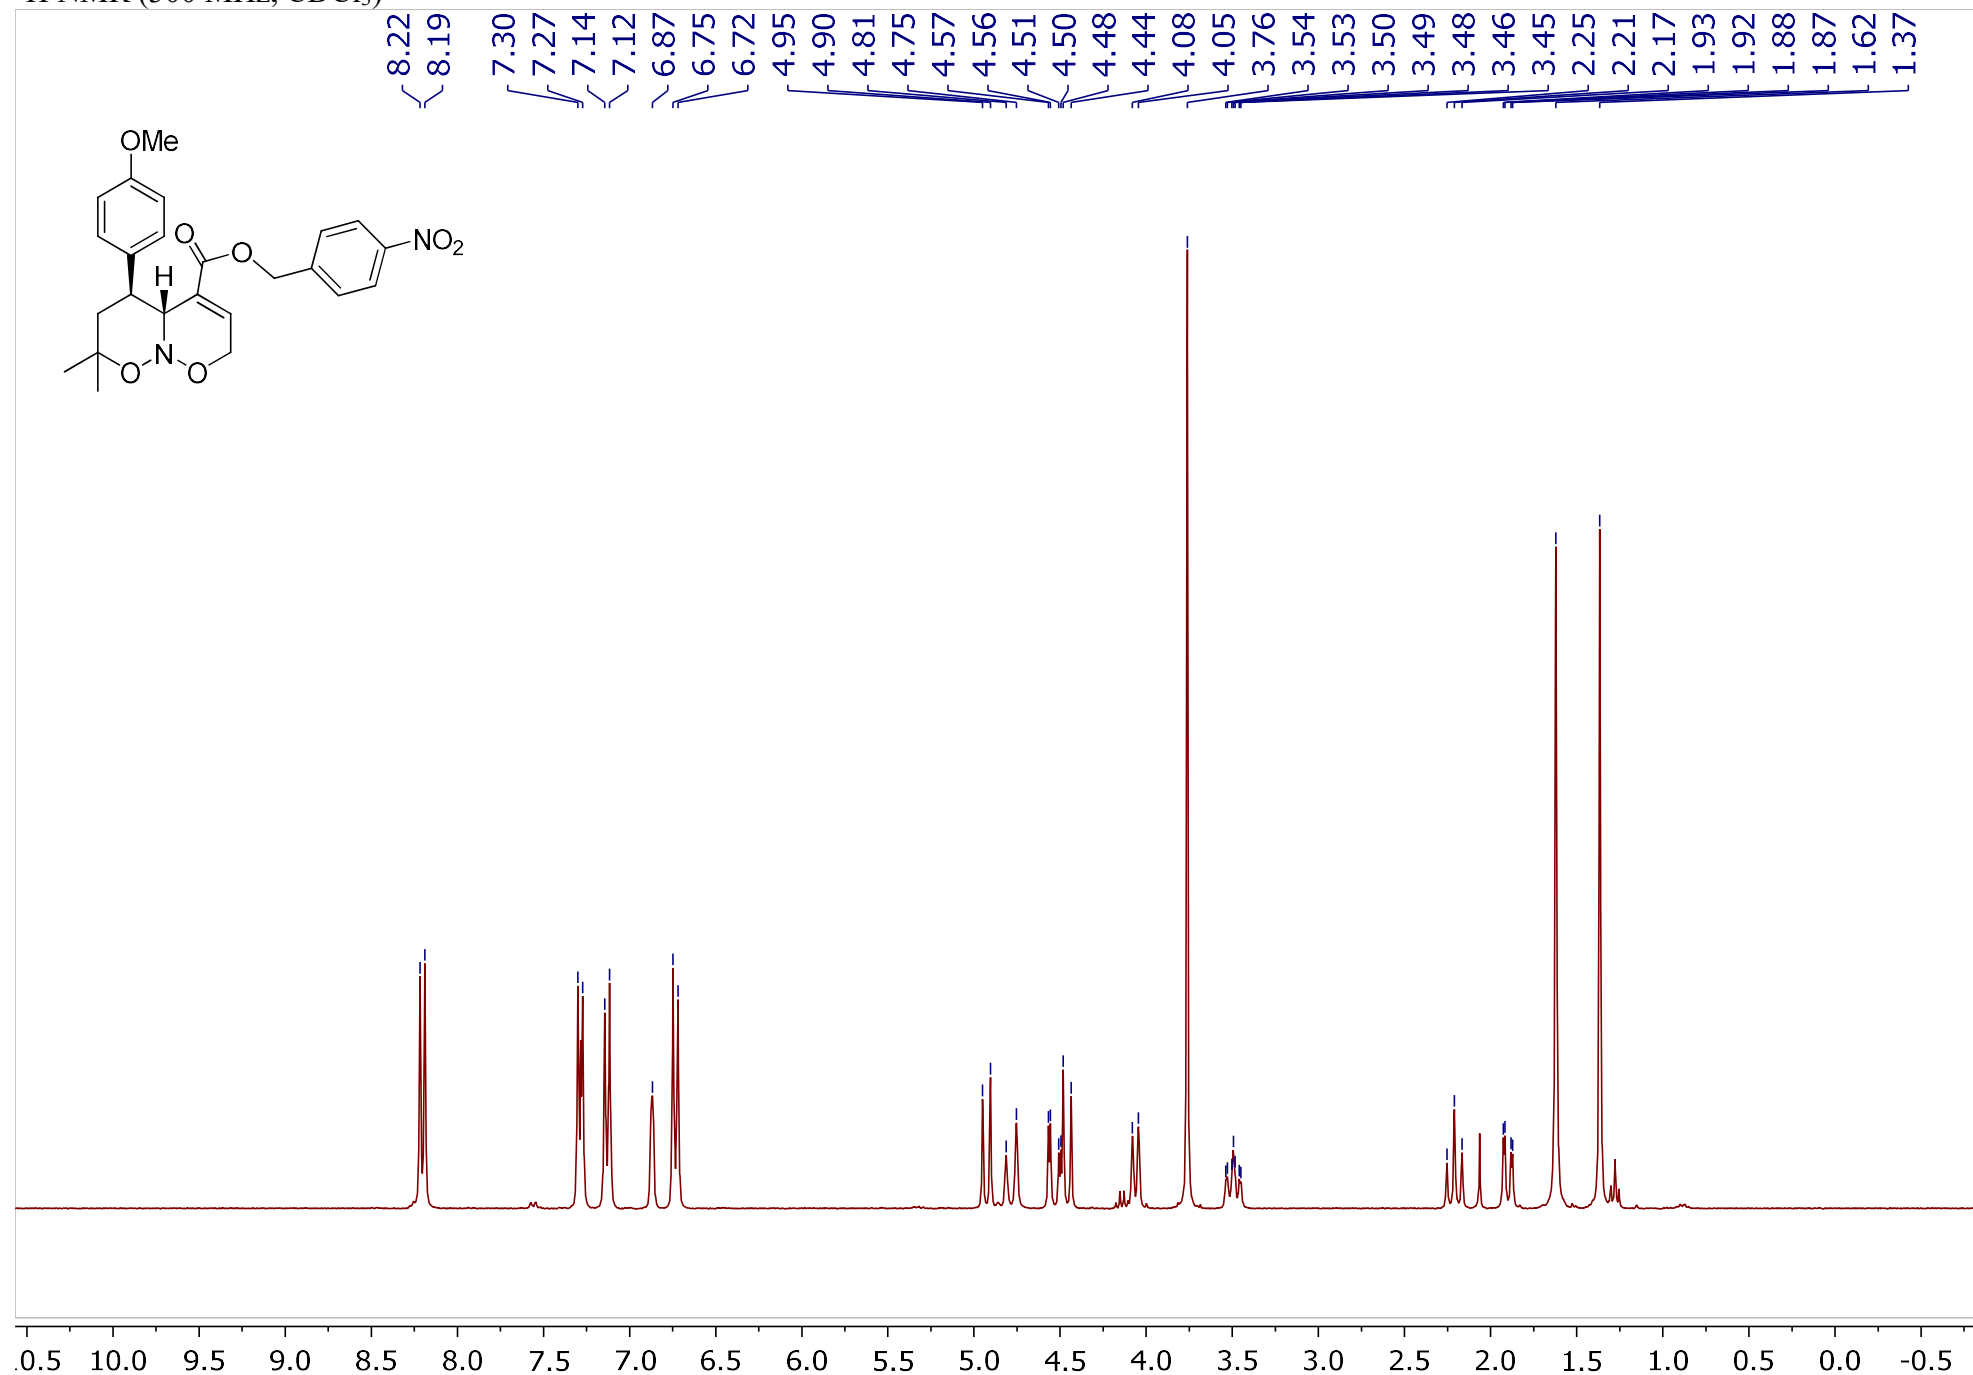

<sup>13</sup>C NMR (75 MHz, CDCl<sub>3</sub>)

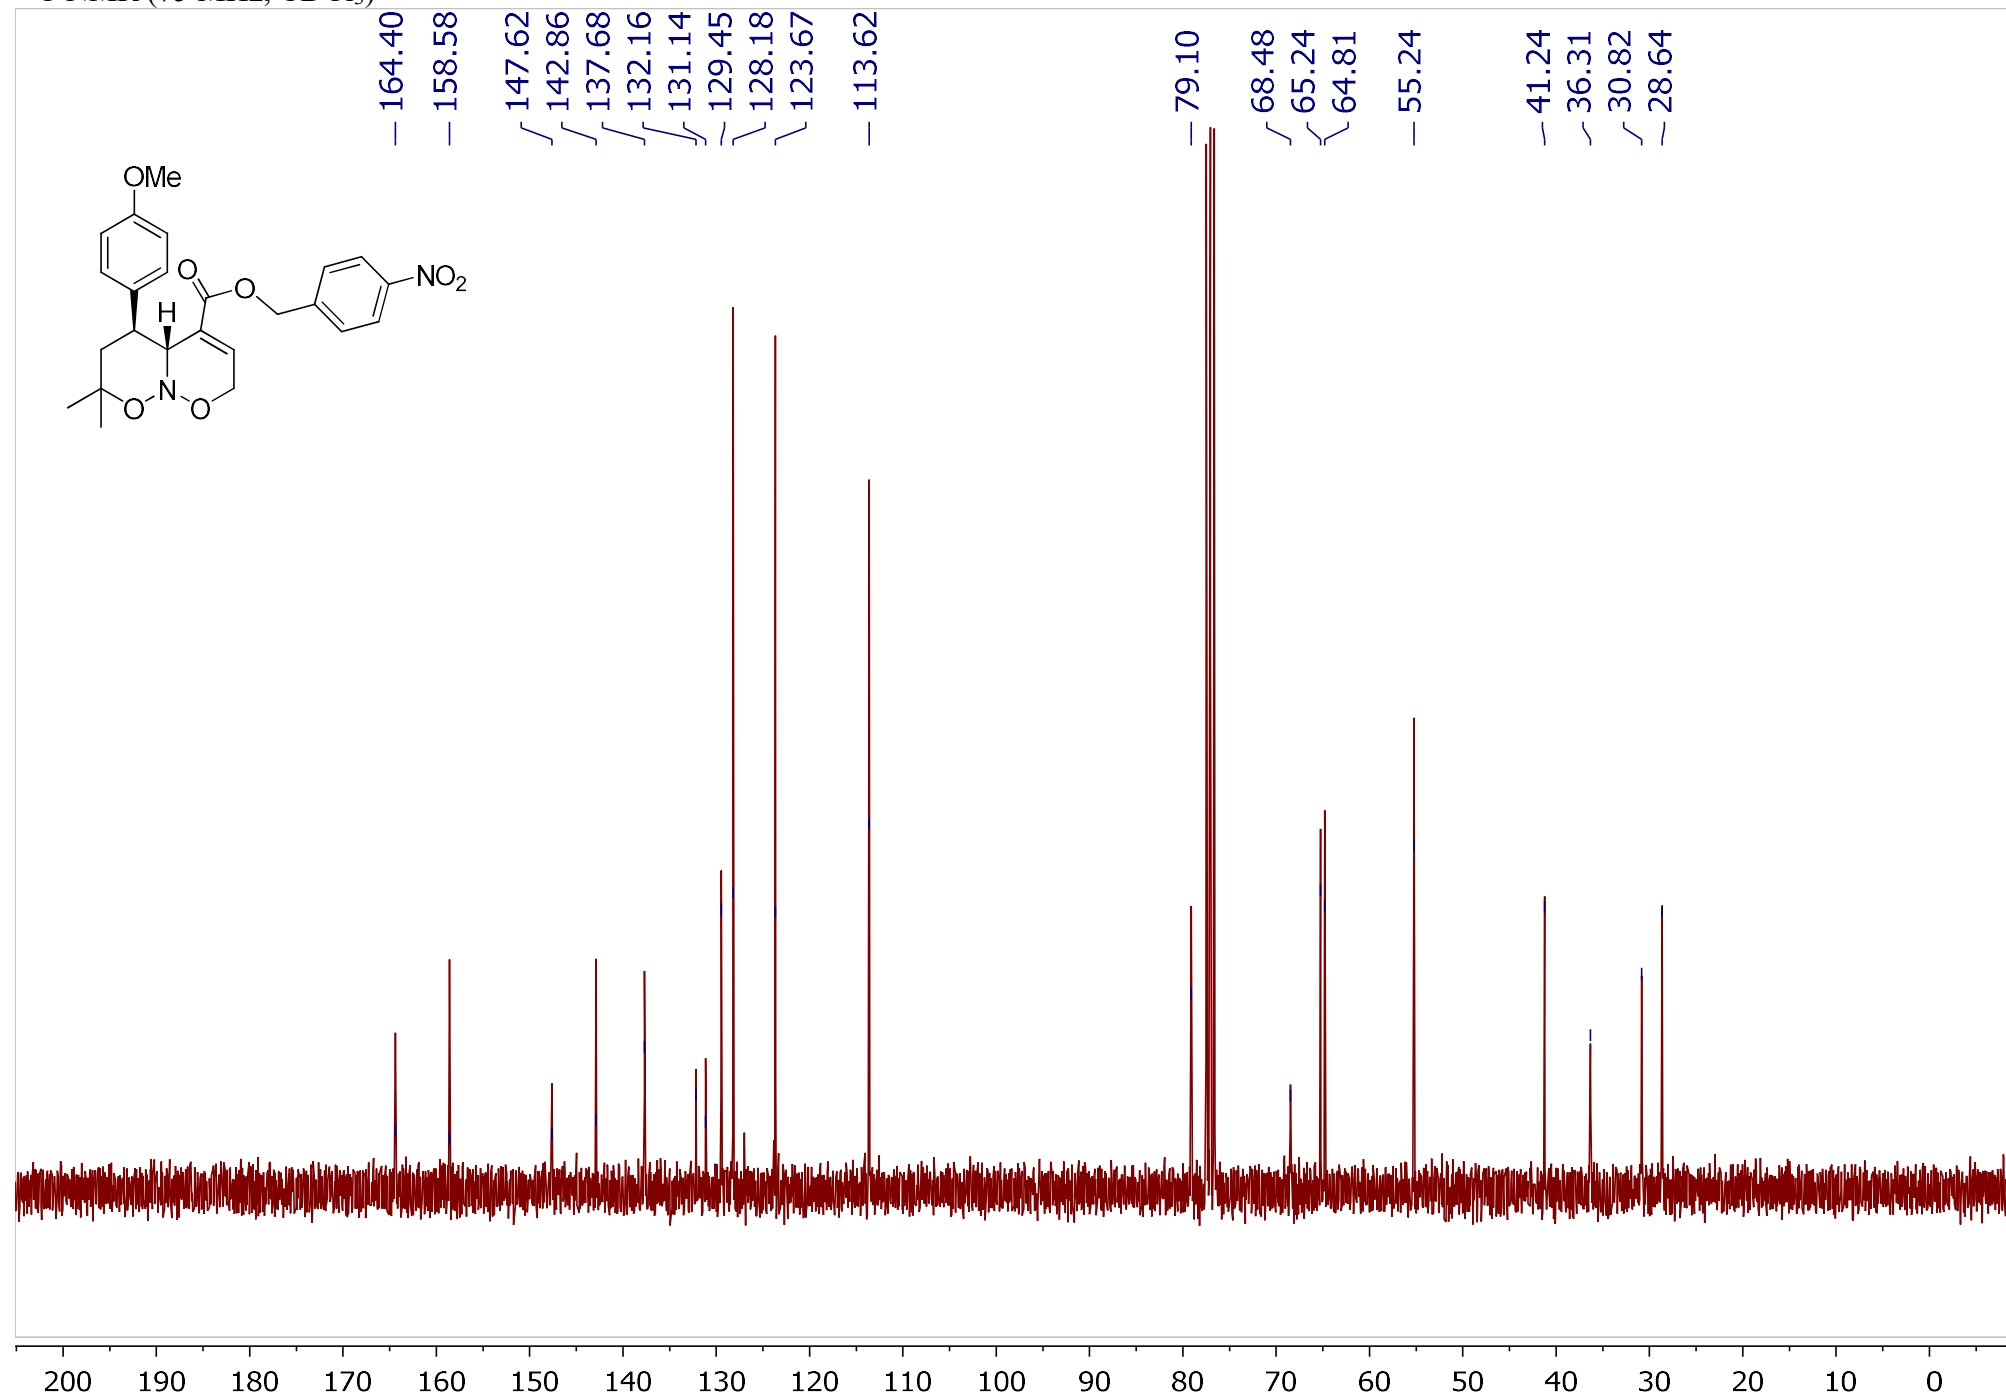

<sup>13</sup>C DEPT 135 (75 MHz, CDCl<sub>3</sub>)

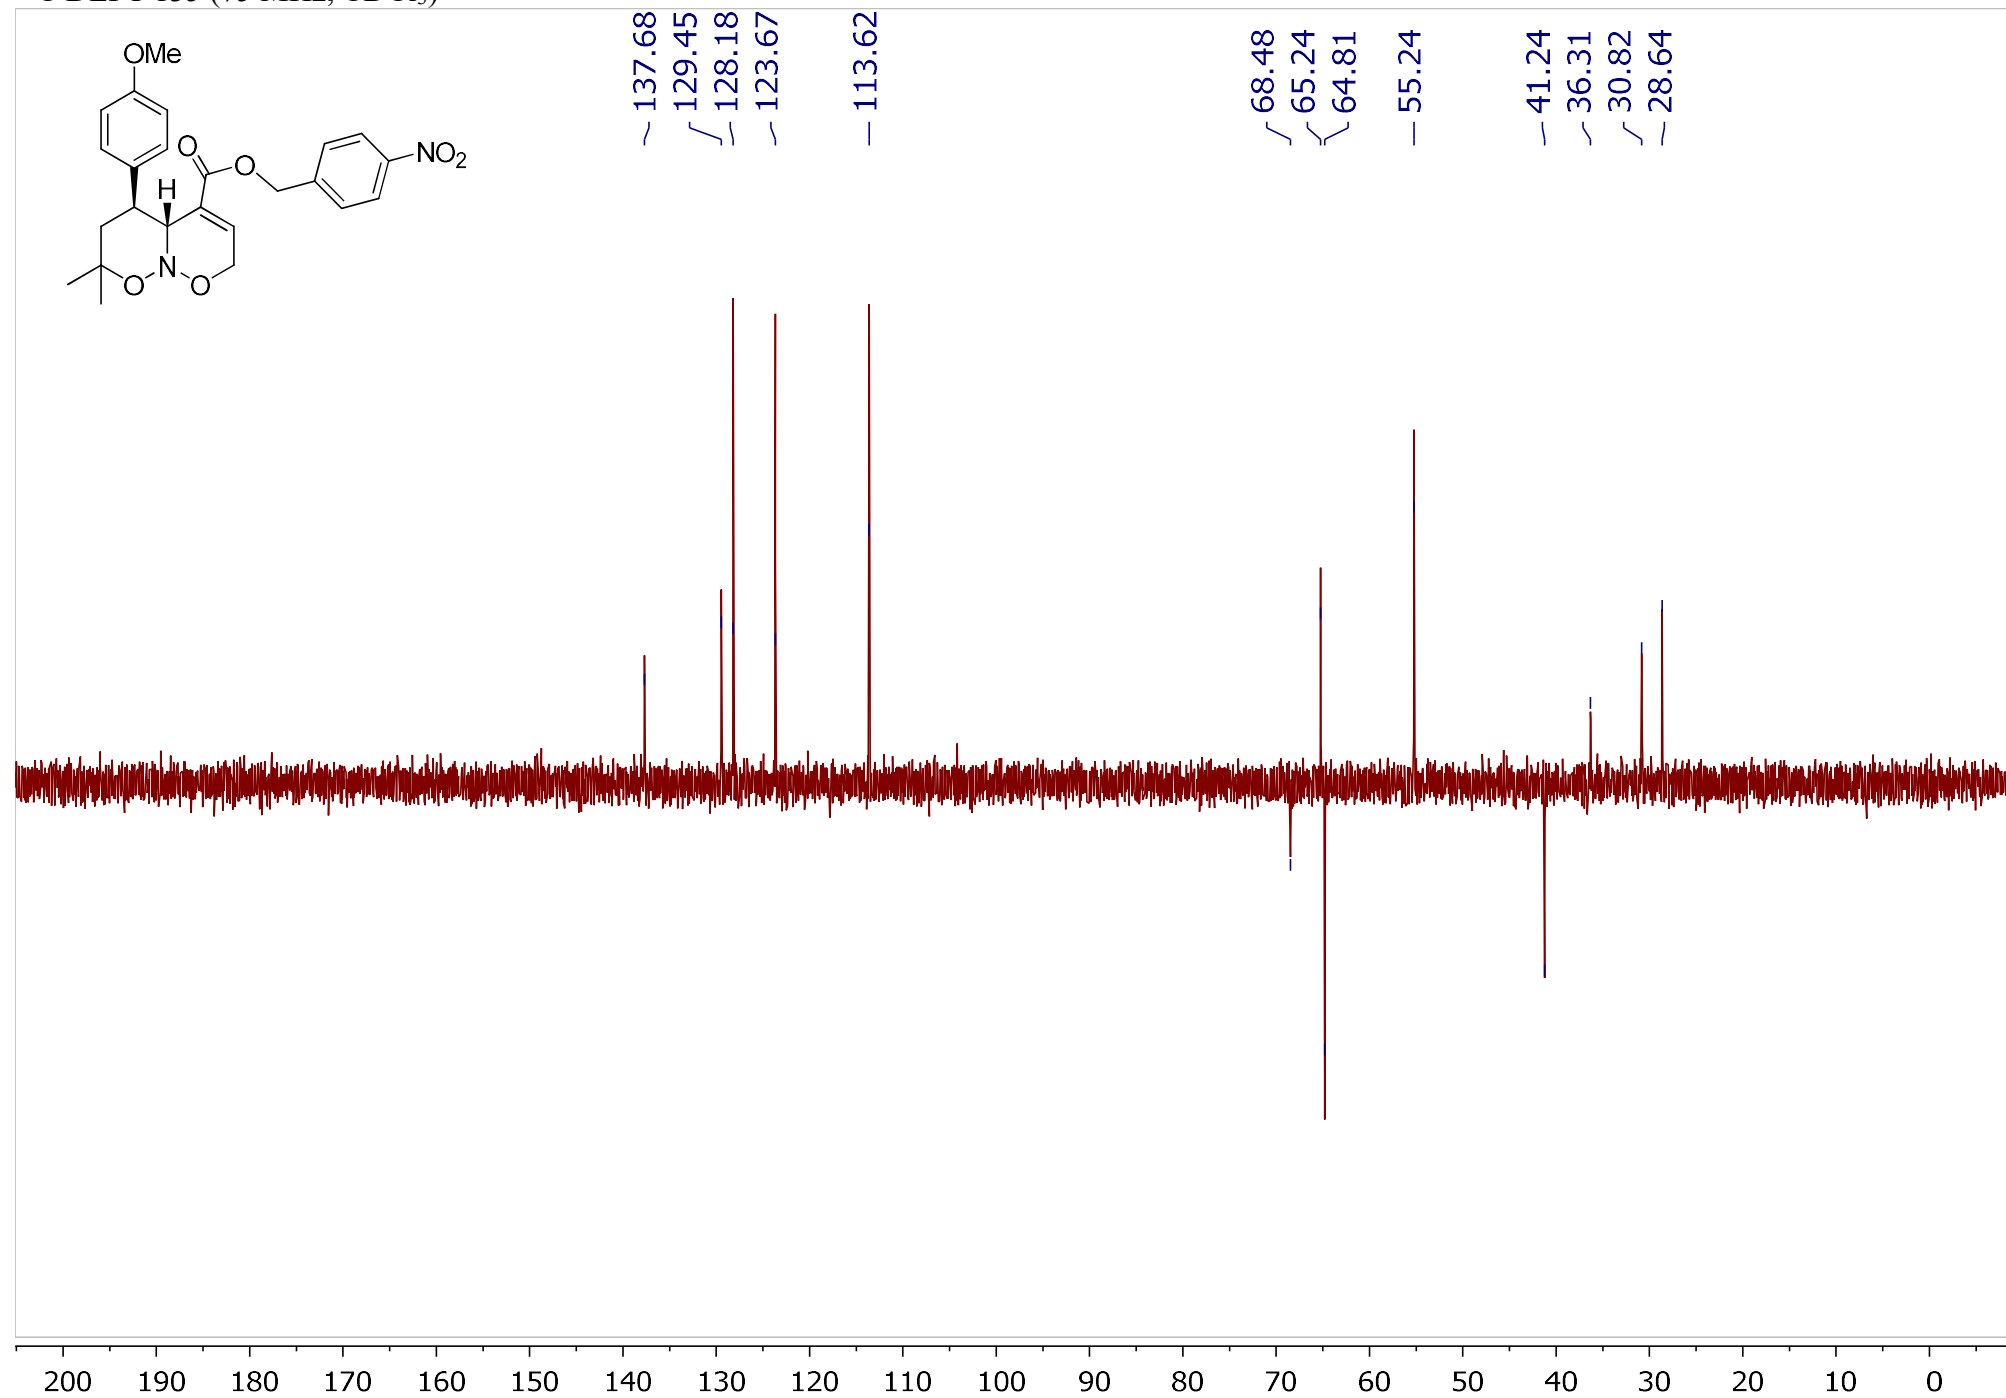

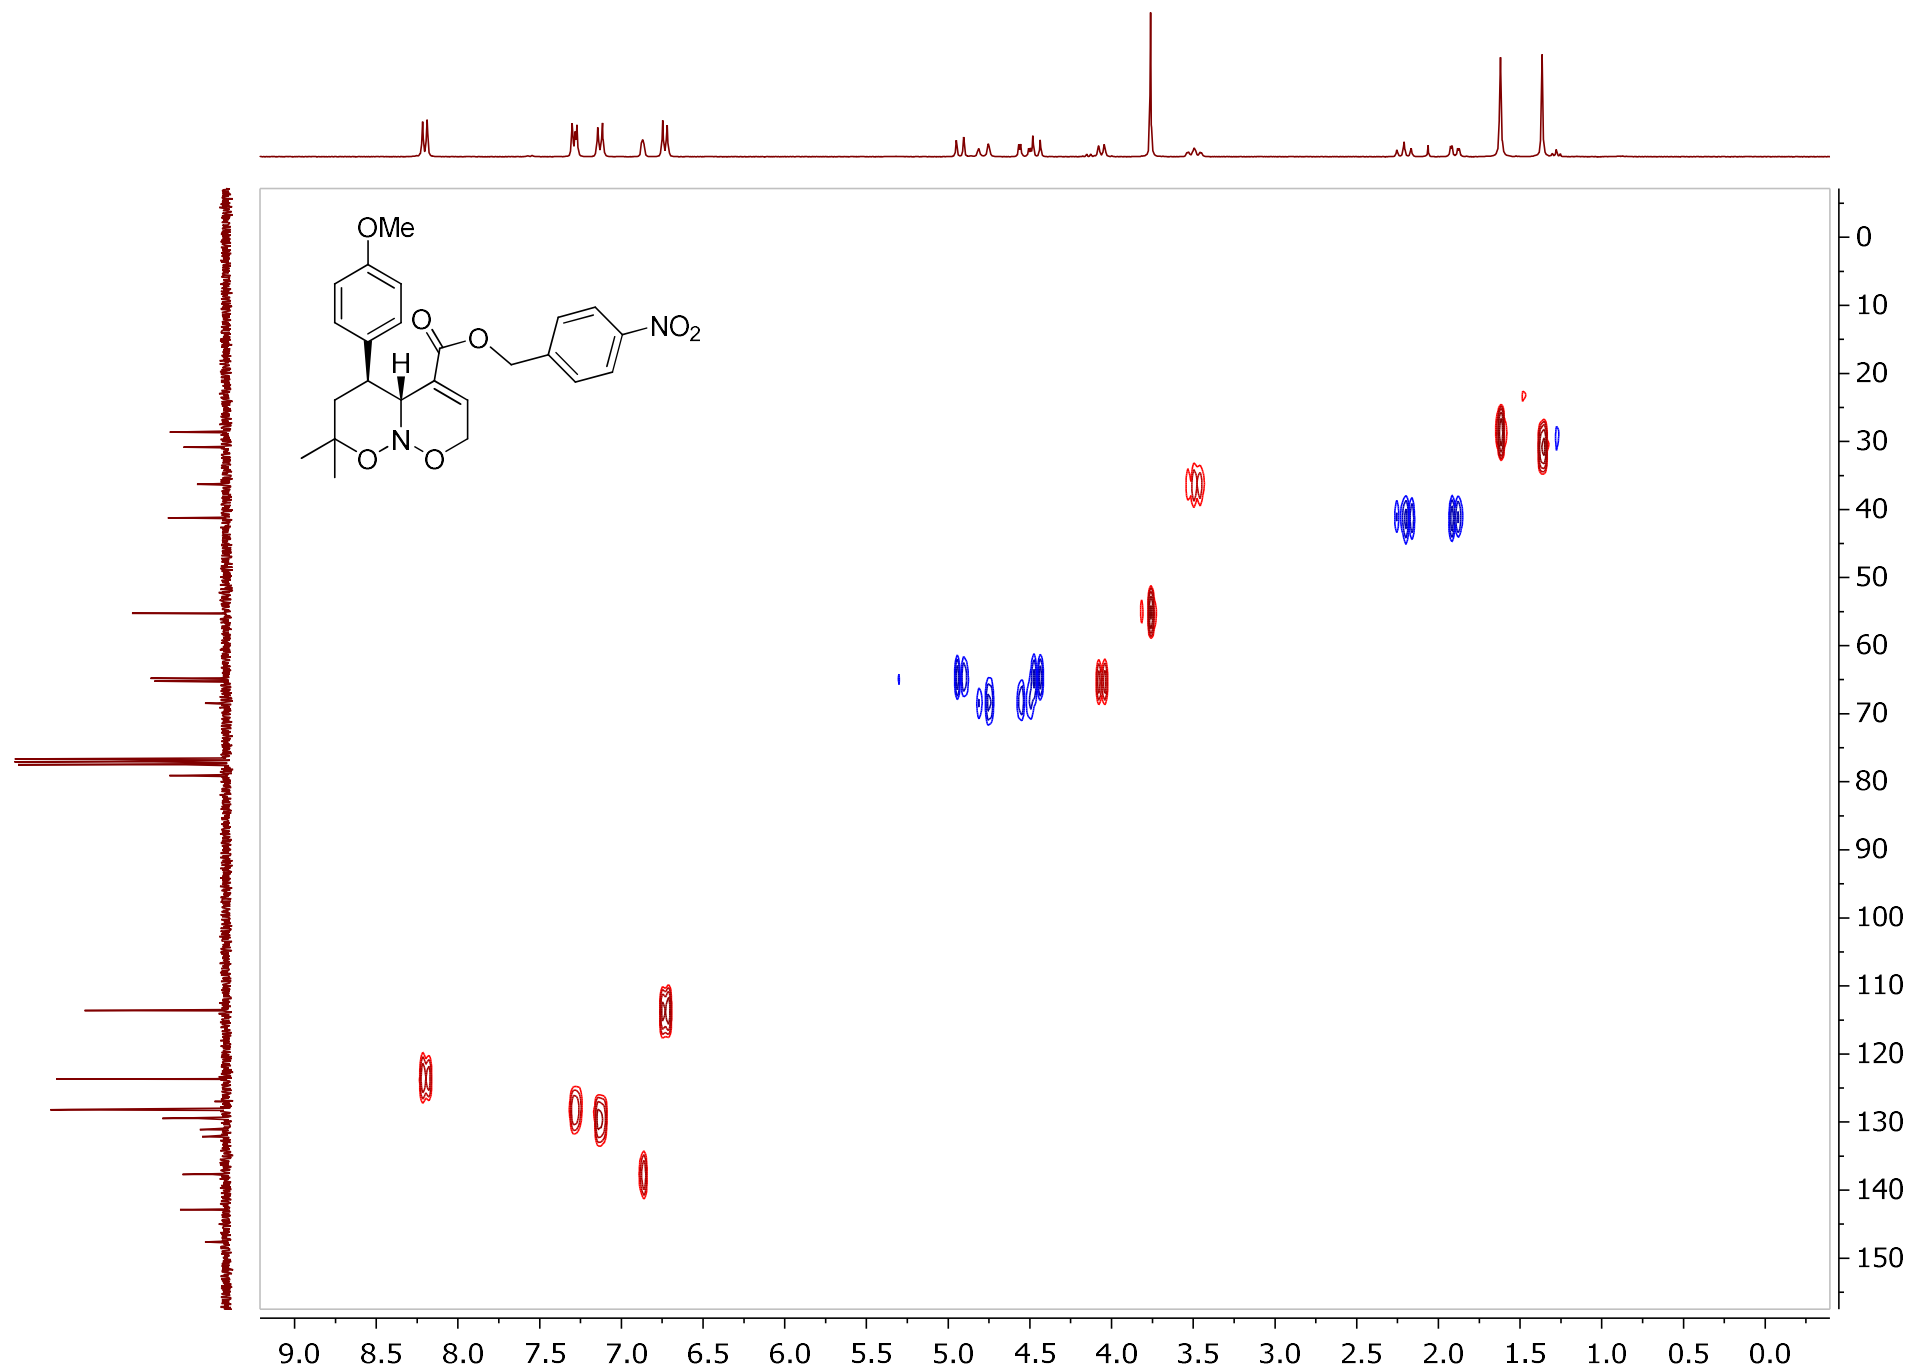

**Phenyl (4aR\*,5S\*)-5-(4-methoxyphenyl)-7,7-dimethyl-4a,5,6,7-tetrahydro-2H-[1,2]oxazino[2,3-b][1,2]oxazine-4-carboxylate 3f**

$^1\text{H}$  NMR (300 MHz,  $\text{CDCl}_3$ )

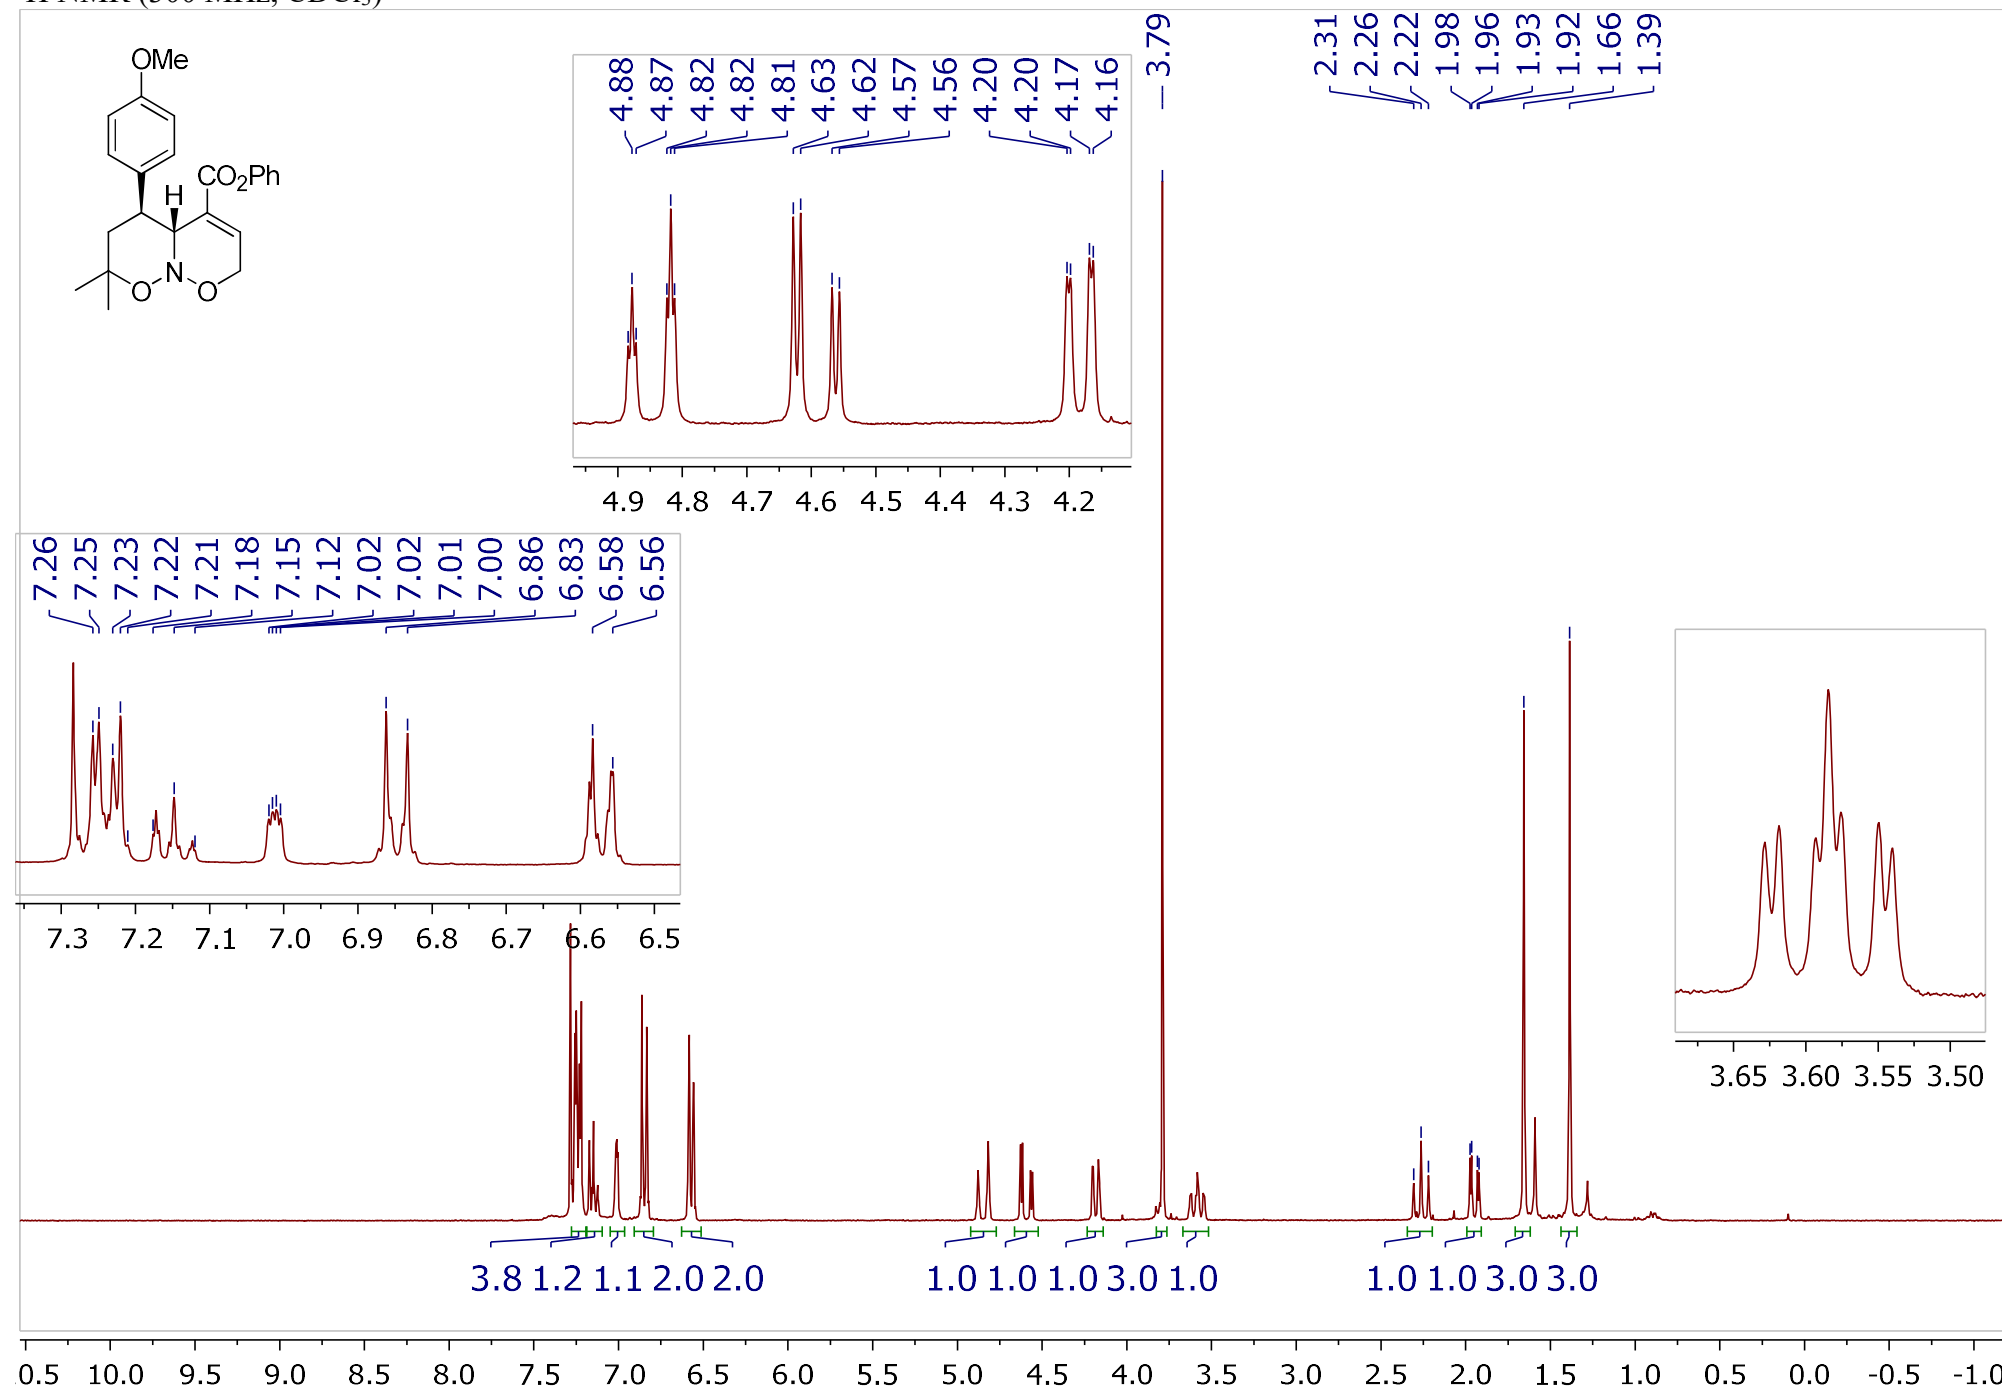

$^{13}\text{C}$  NMR (75 MHz,  $\text{CDCl}_3$ )

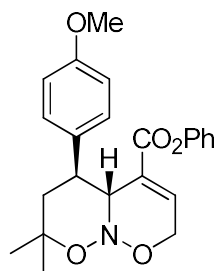

163.12  
158.83  
150.21  
138.06  
132.15  
131.19  
129.62  
129.00  
125.62  
121.30  
114.03  
79.20  
68.55  
65.24  
55.26  
41.39  
36.44  
30.88  
28.73

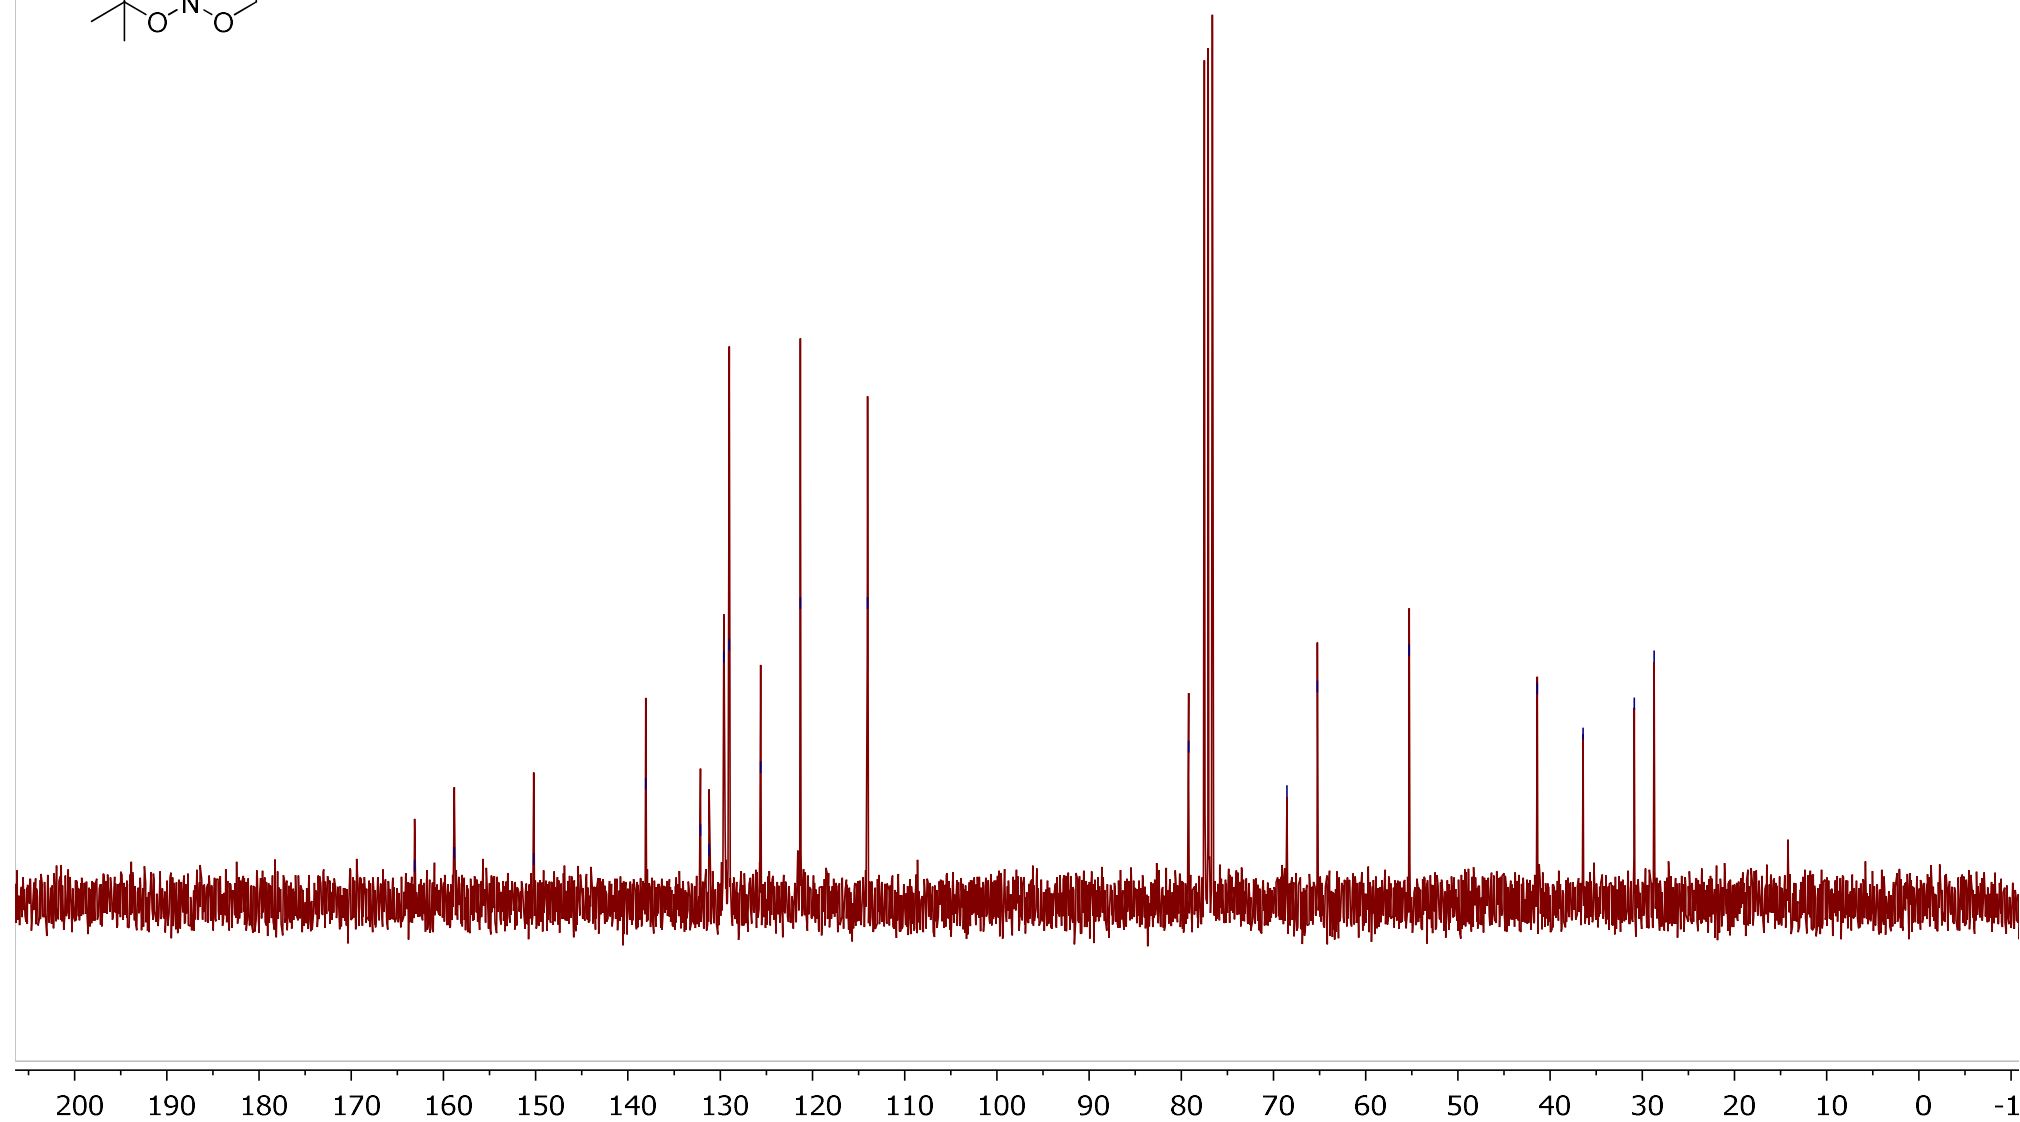



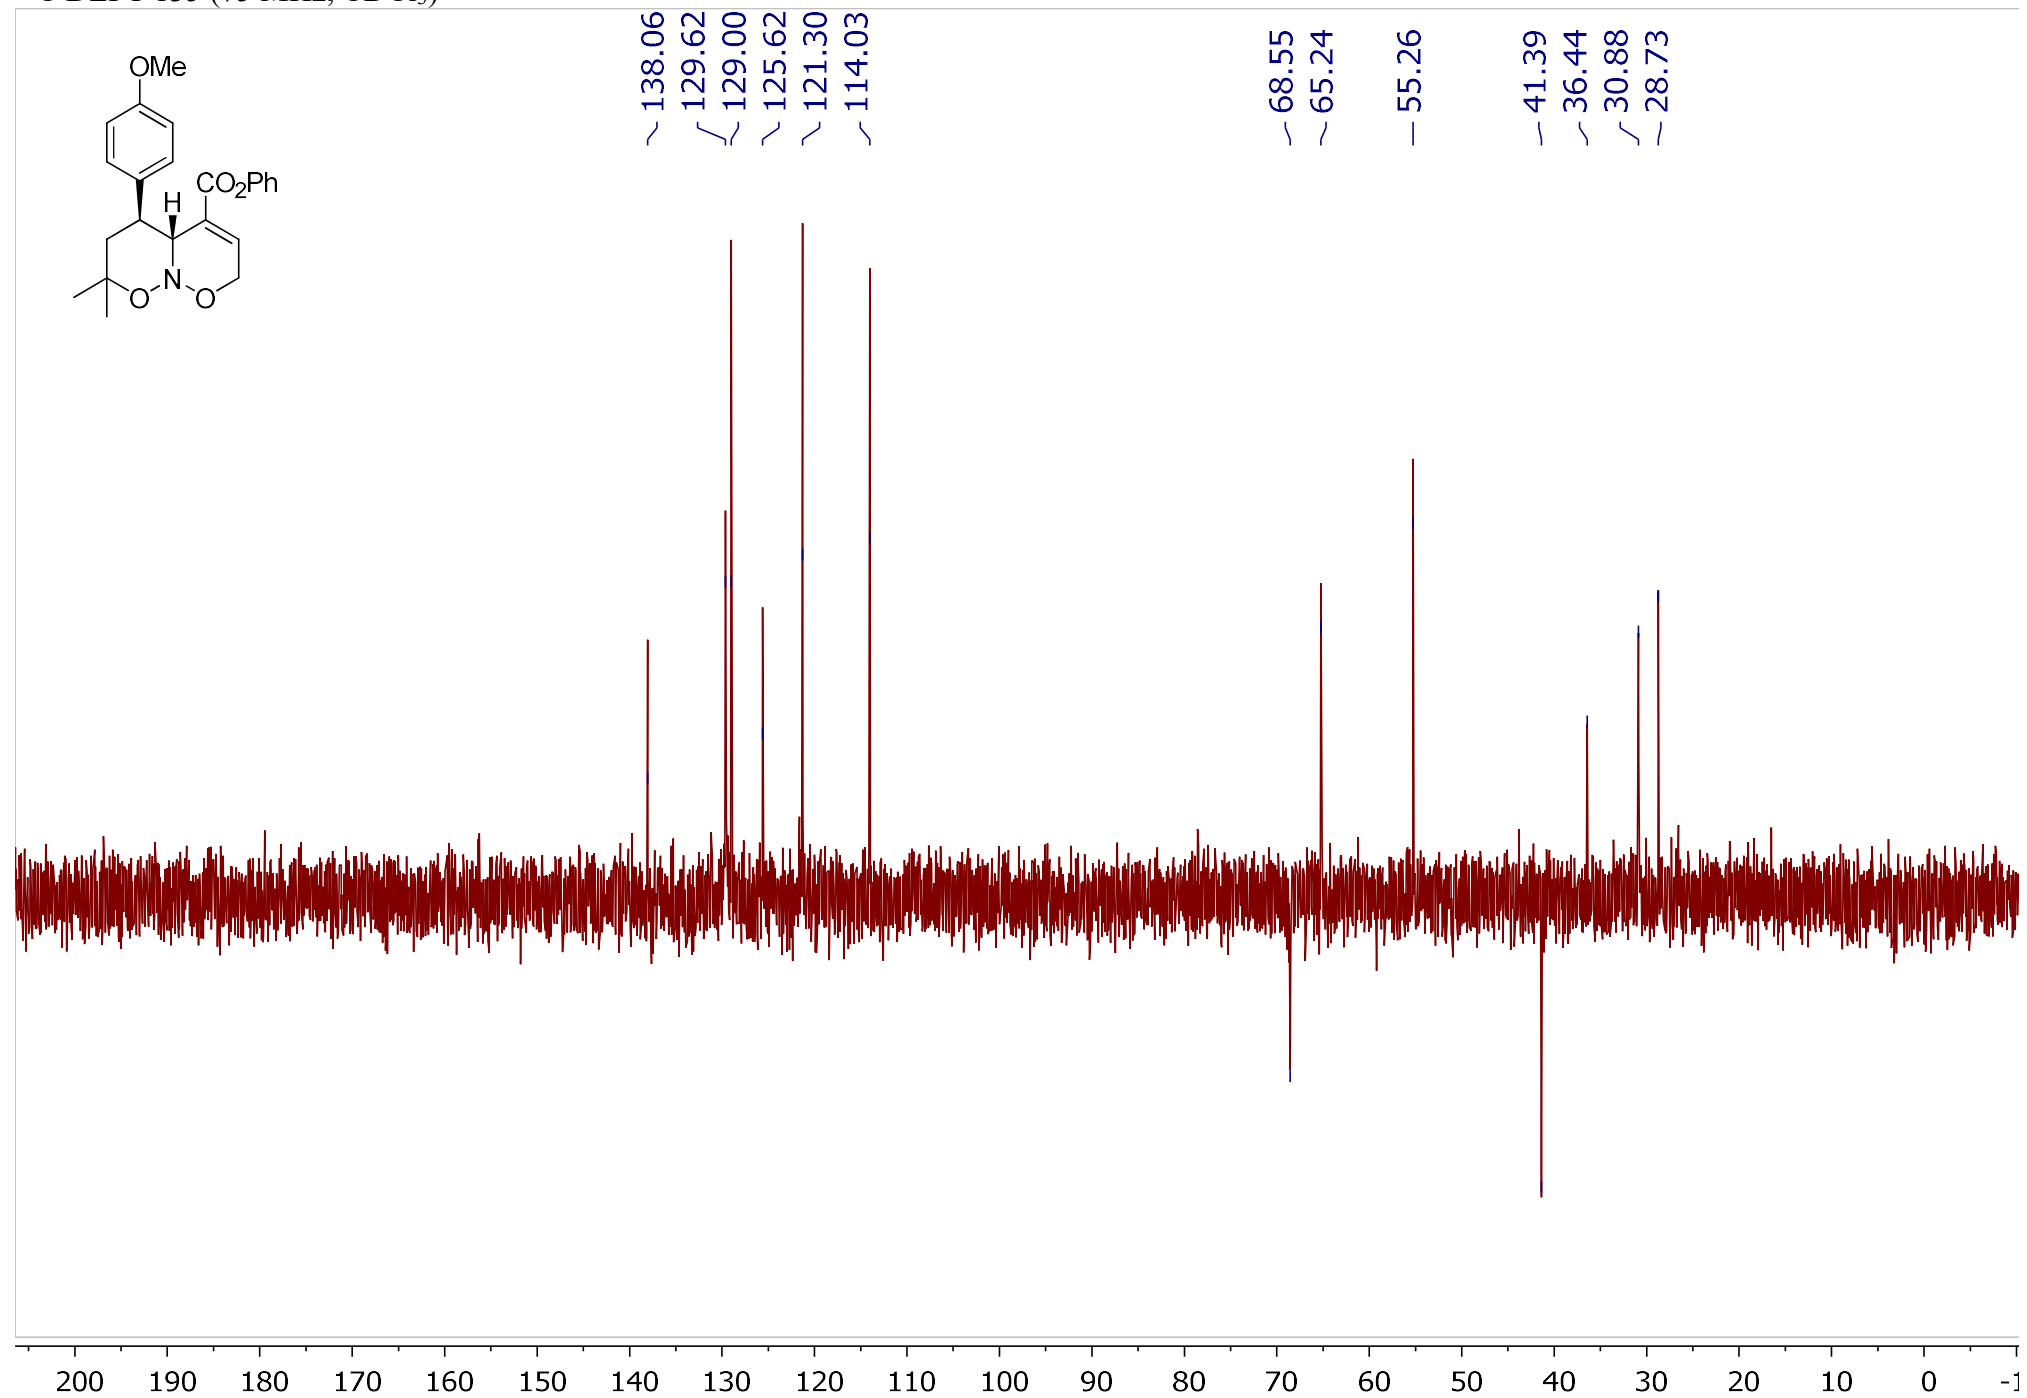

**2,2,2-Trichloroethyl (4aR\*,5S\*)-5-(4-chlorophenyl)-7,7-dimethyl-4a,5,6,7-tetrahydro-2H-[1,2]oxazino[2,3-b][1,2]oxazine-4-carboxylate 3g**  
<sup>1</sup>H NMR (300 MHz, CDCl<sub>3</sub>)

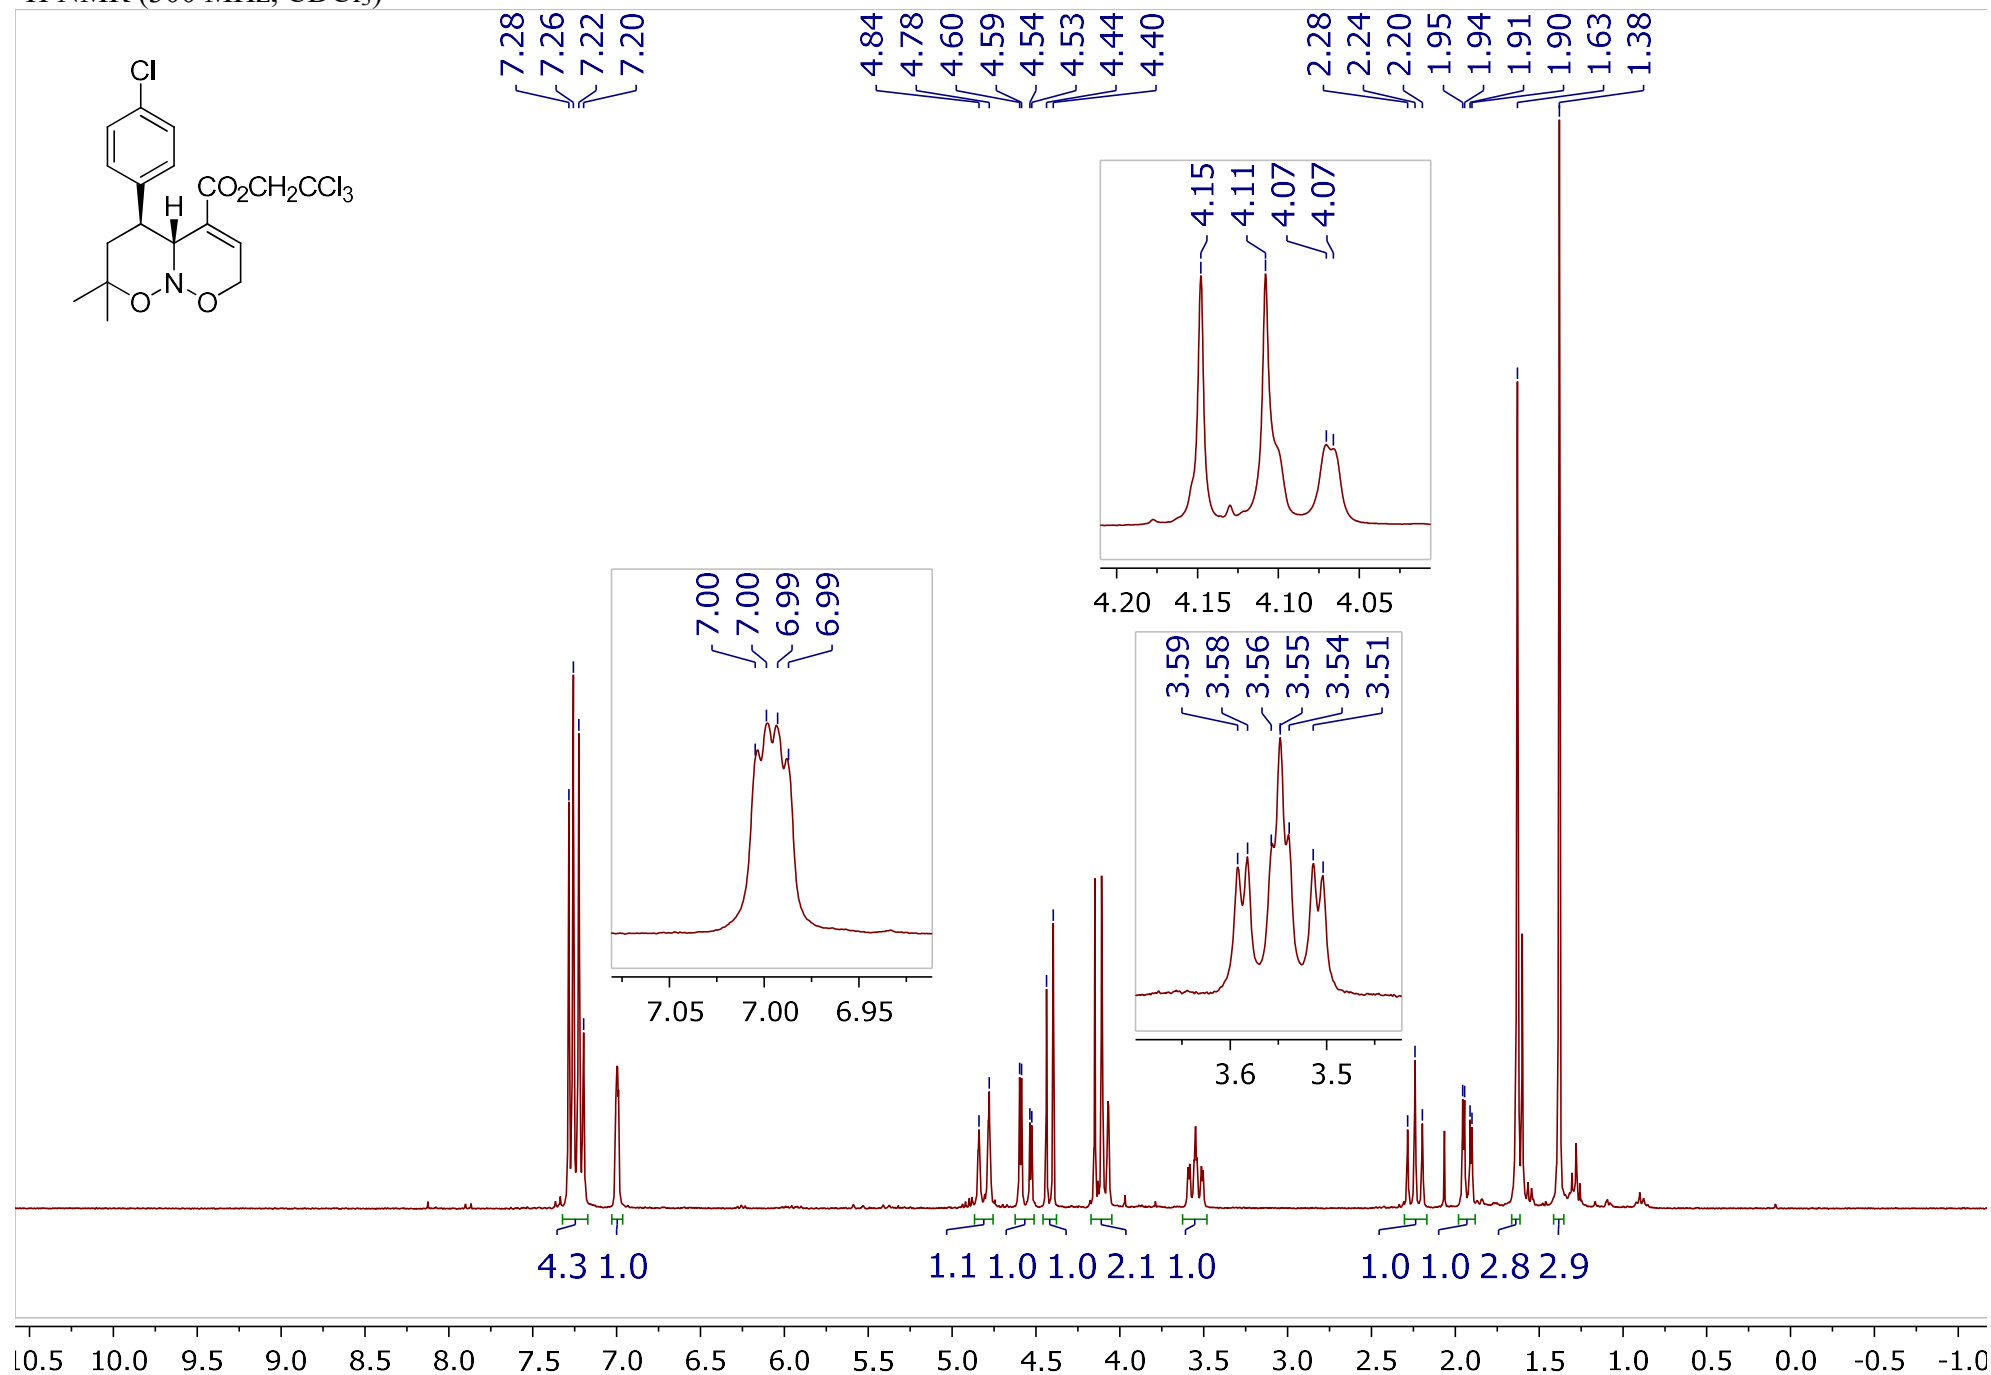

<sup>13</sup>C NMR (75 MHz, CDCl<sub>3</sub>)

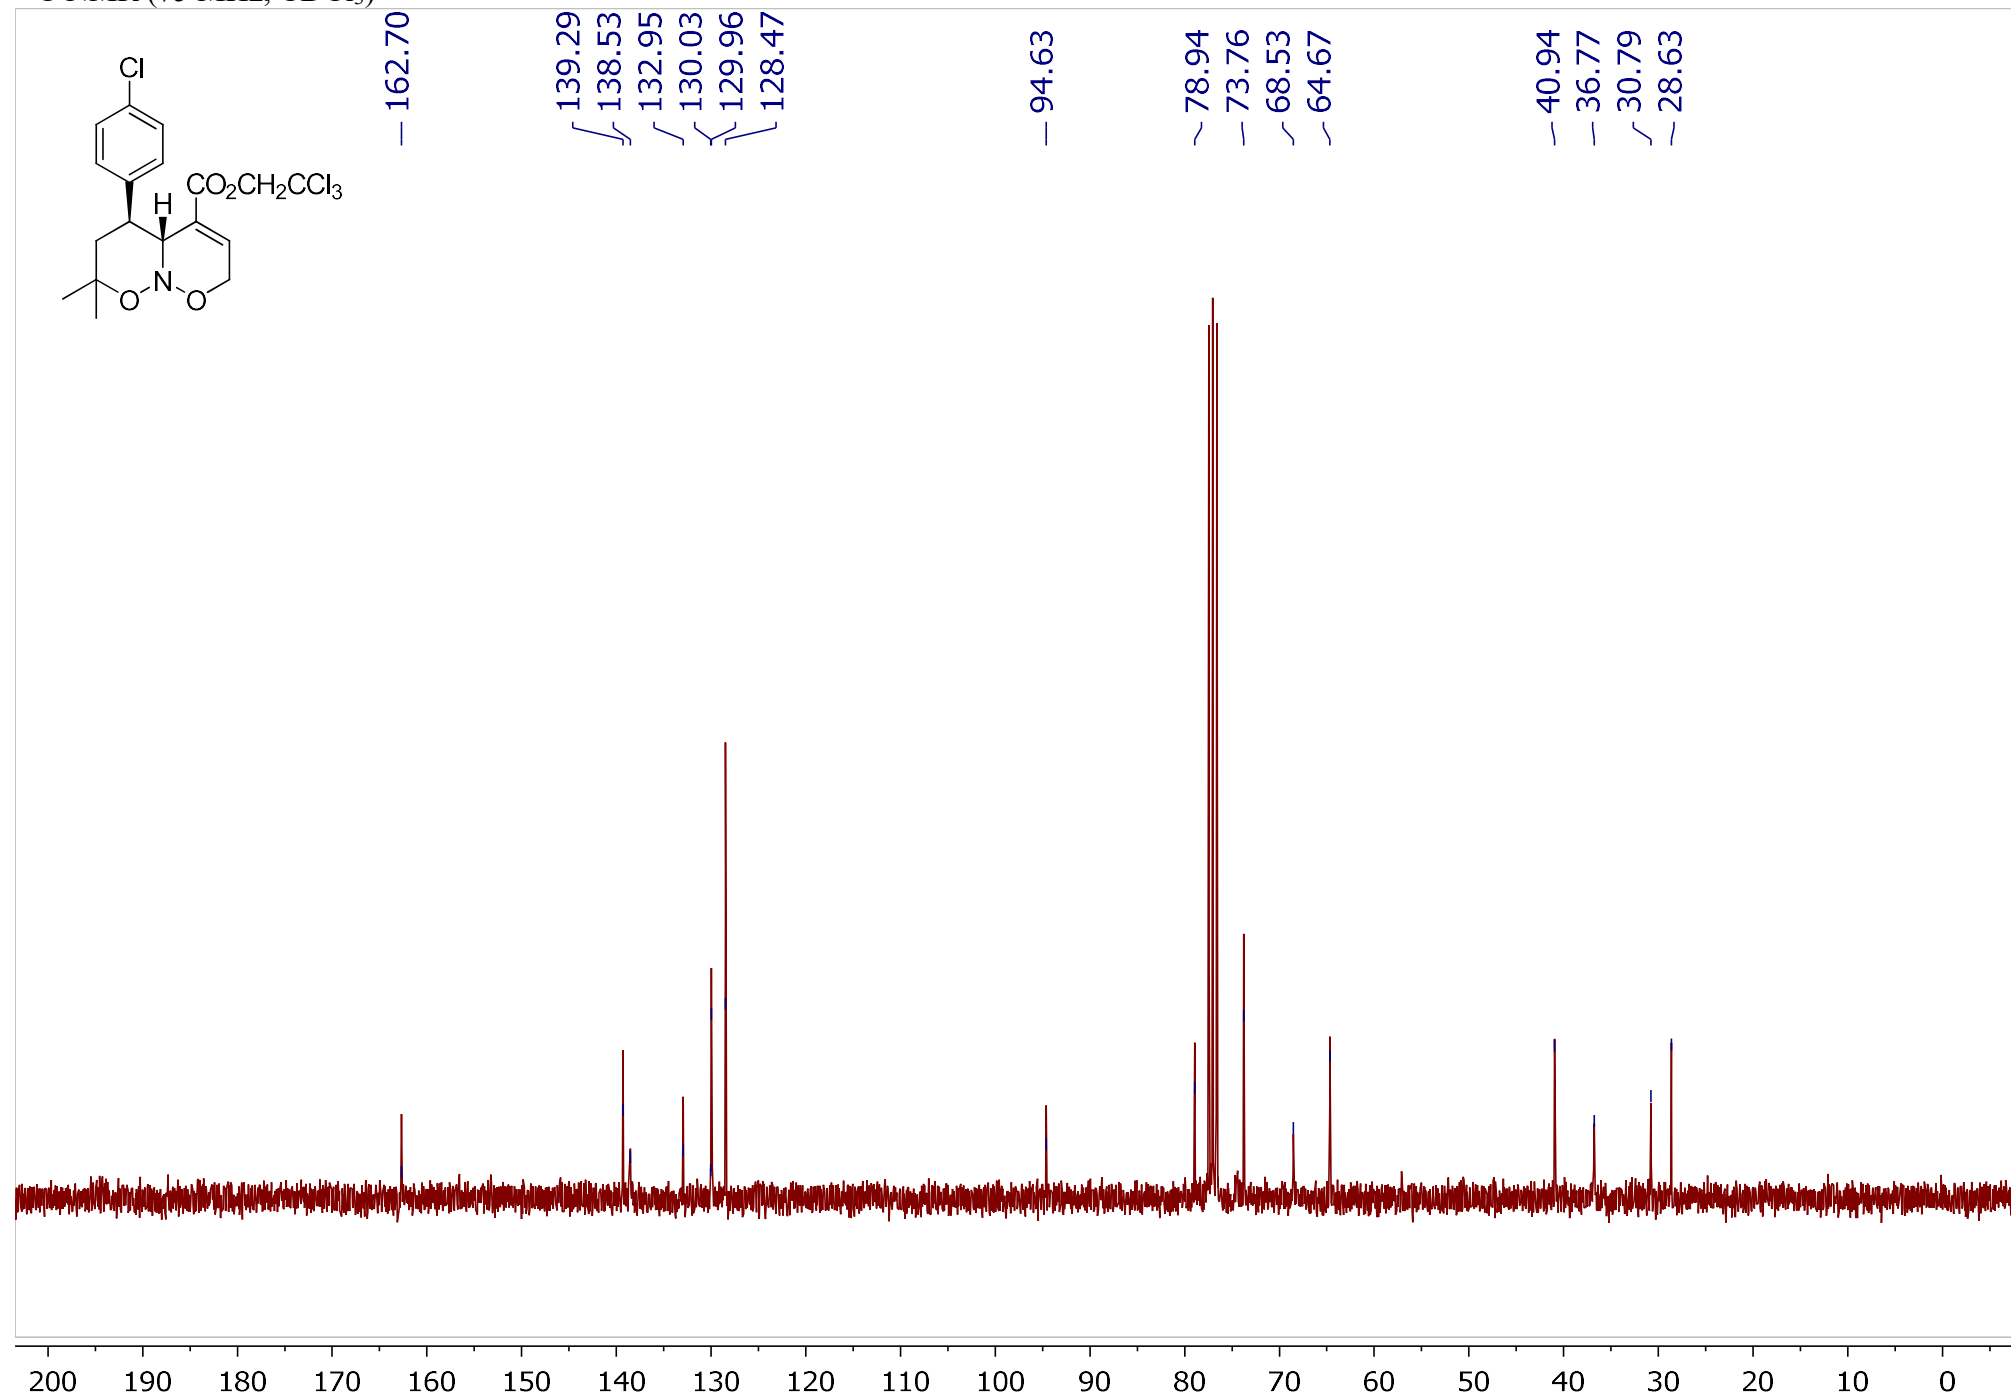

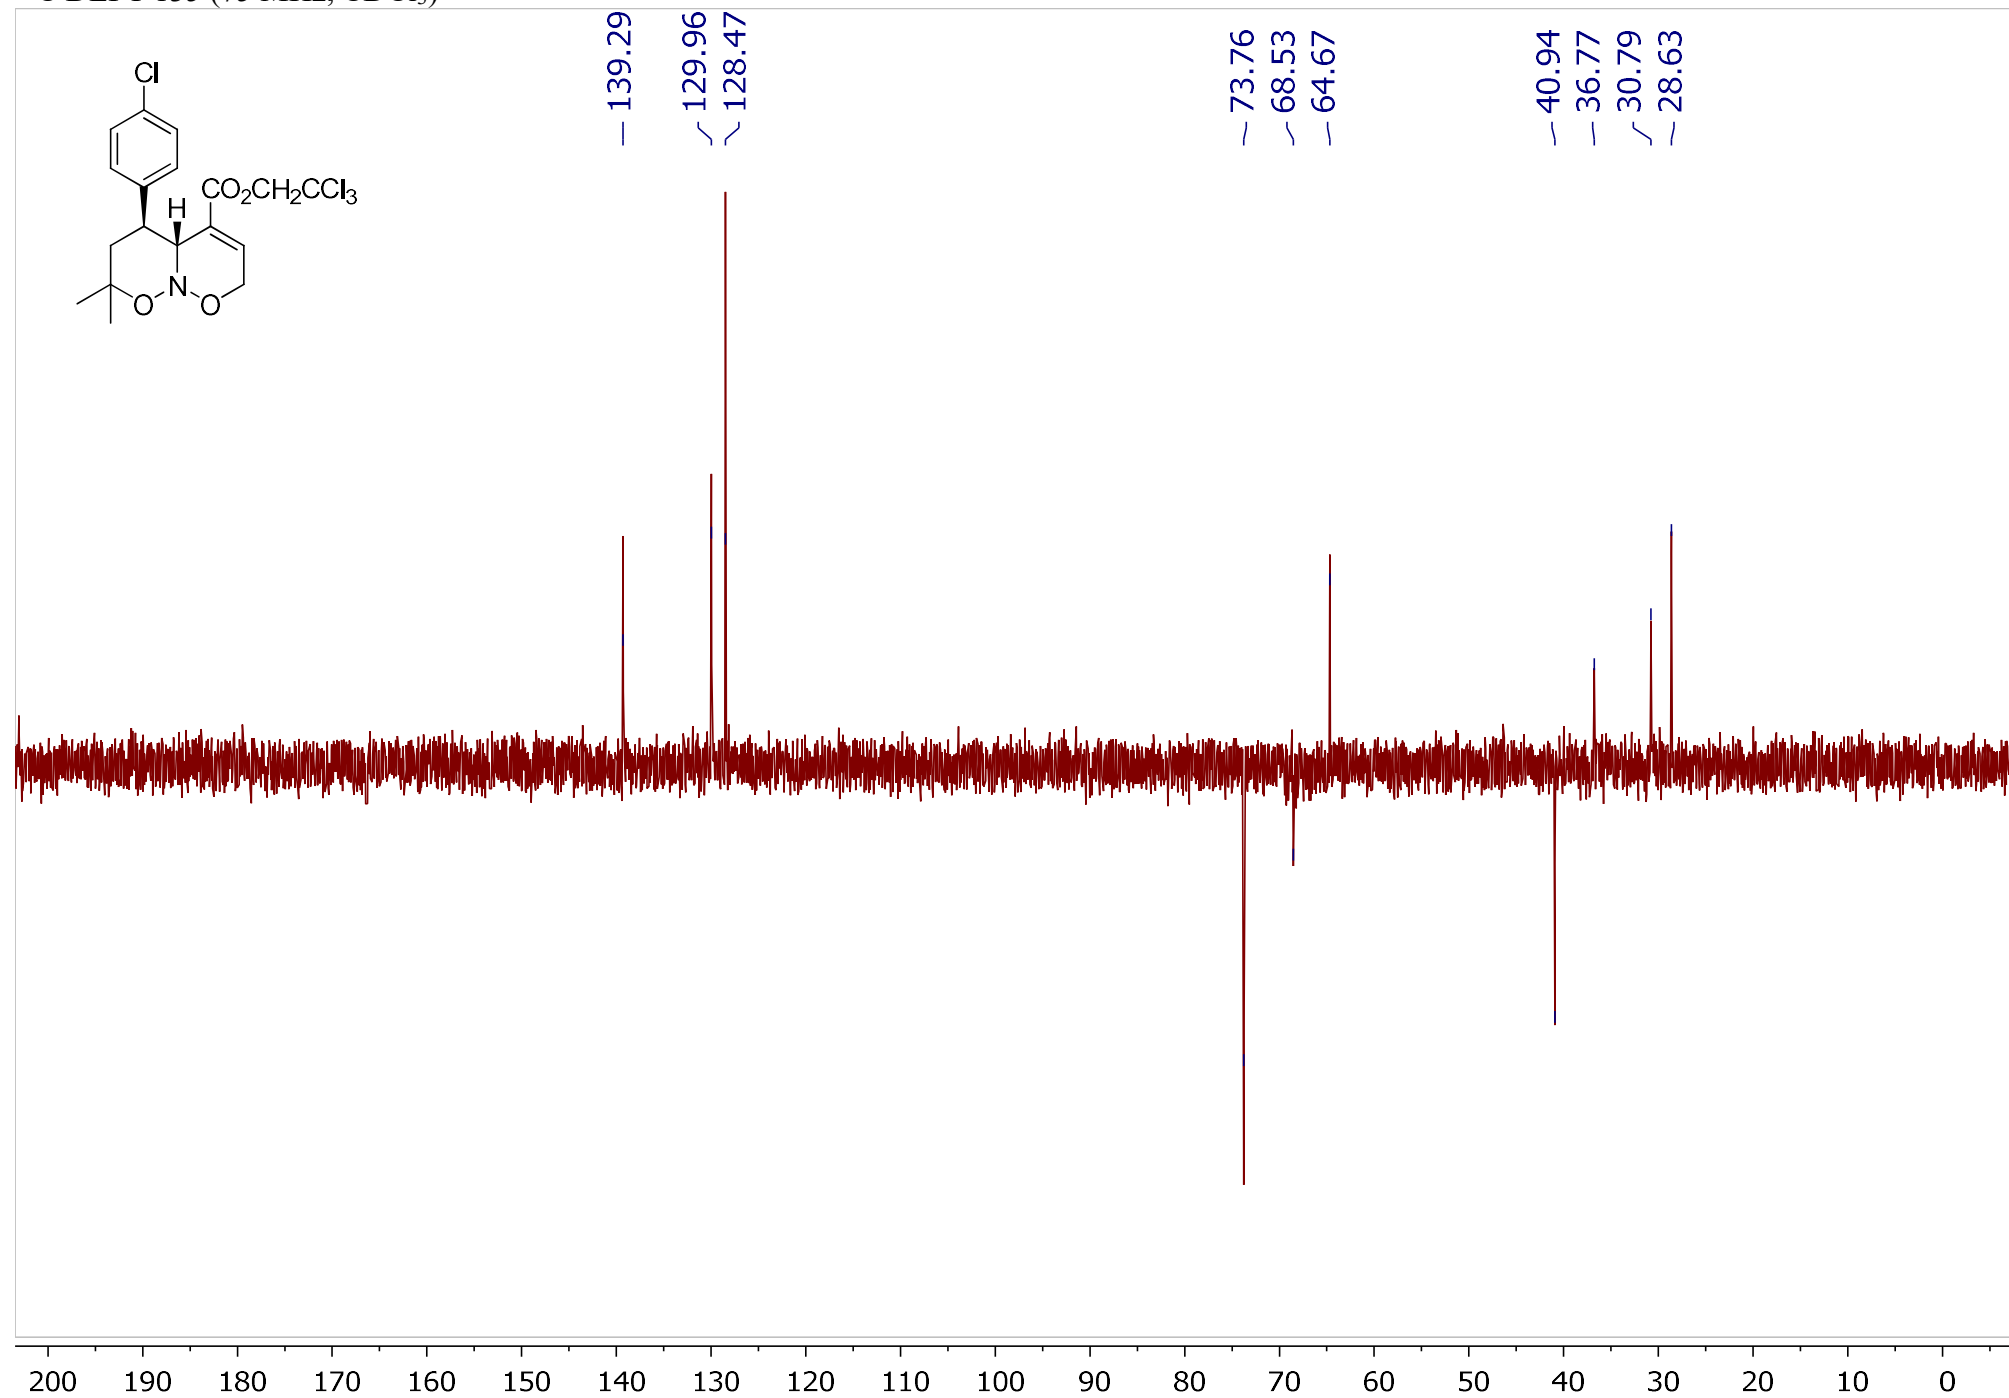

**2,2,2-Trichloroethyl (4aR\*,5S\*)-7,7-dimethyl-5-(4-nitrophenyl)-4a,5,6,7-tetrahydro-2H-[1,2]oxazino[2,3-b][1,2]oxazine-4-carboxylate 3h**

<sup>1</sup>H NMR (300 MHz, CDCl<sub>3</sub>)

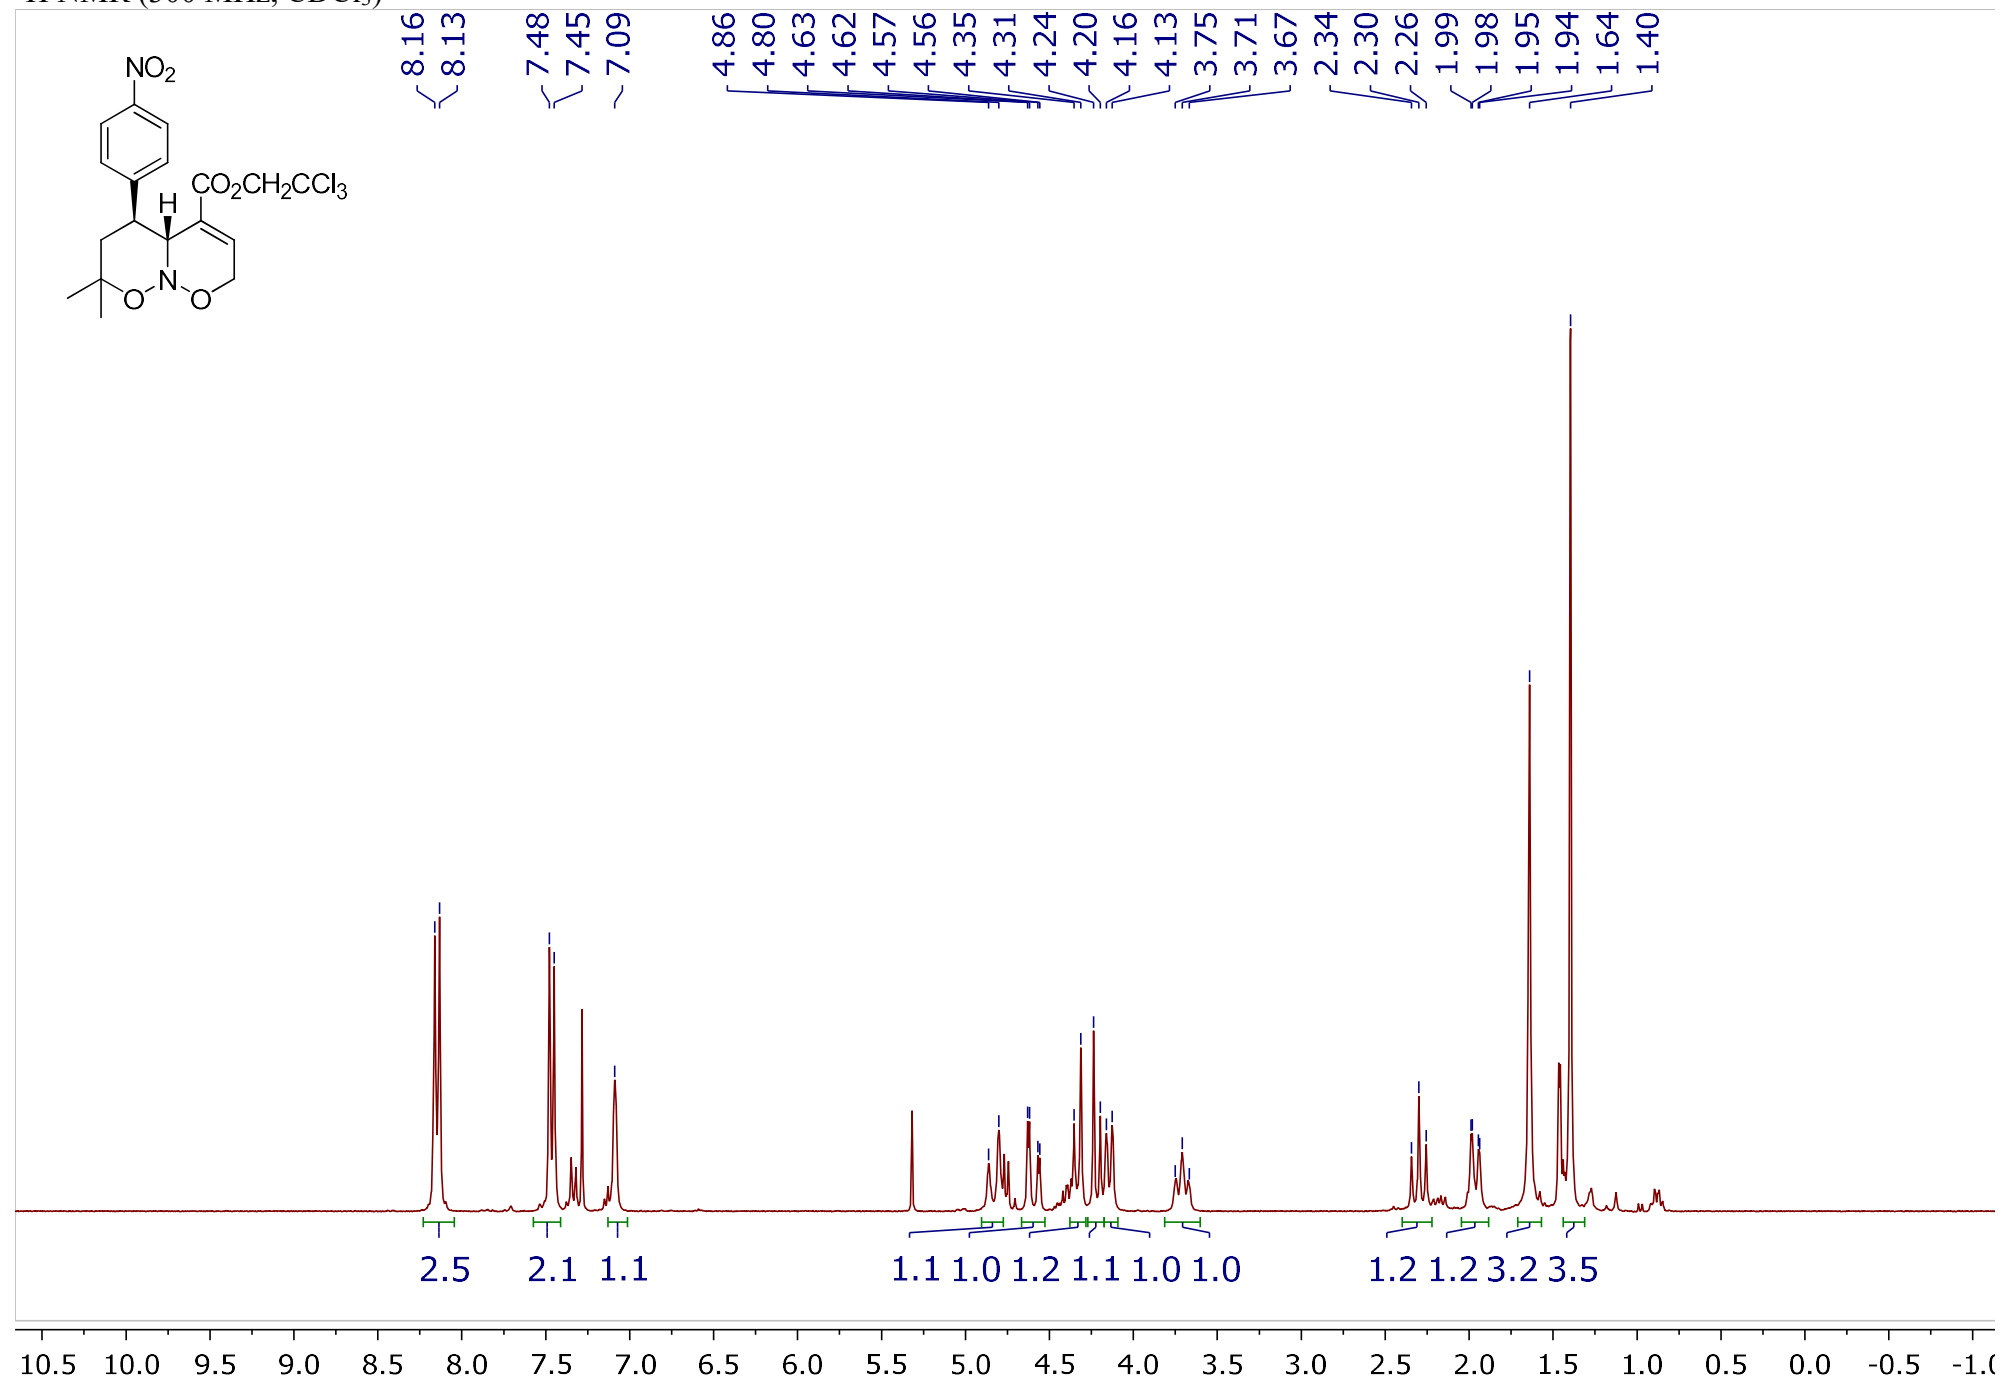

$^{13}\text{C}$  NMR (75 MHz,  $\text{CDCl}_3$ )

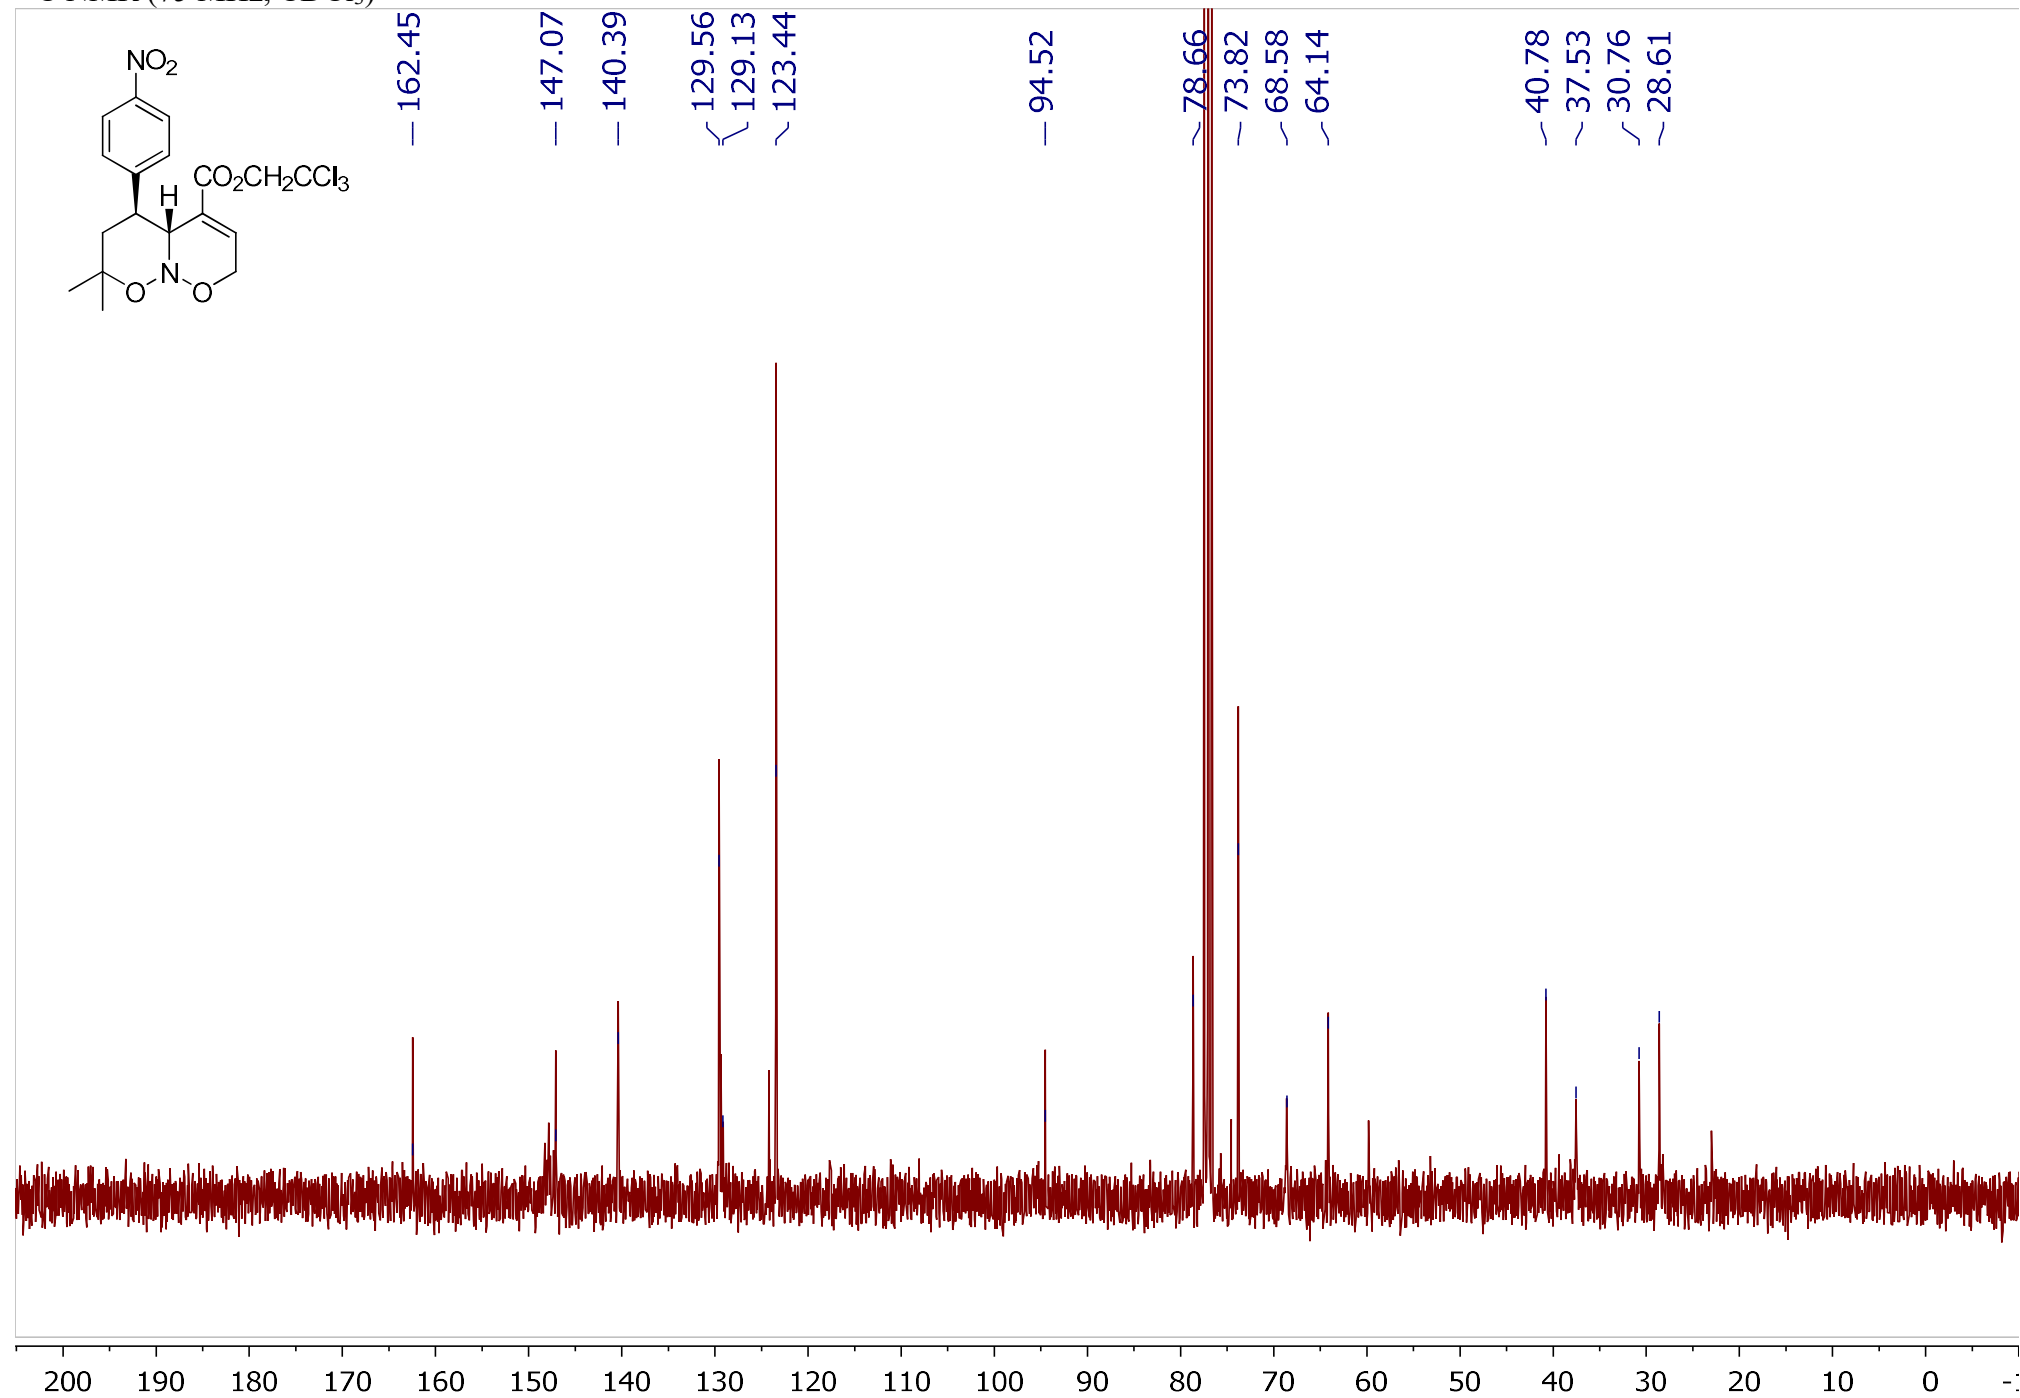

<sup>13</sup>C DEPT 135 (75 MHz, CDCl<sub>3</sub>)

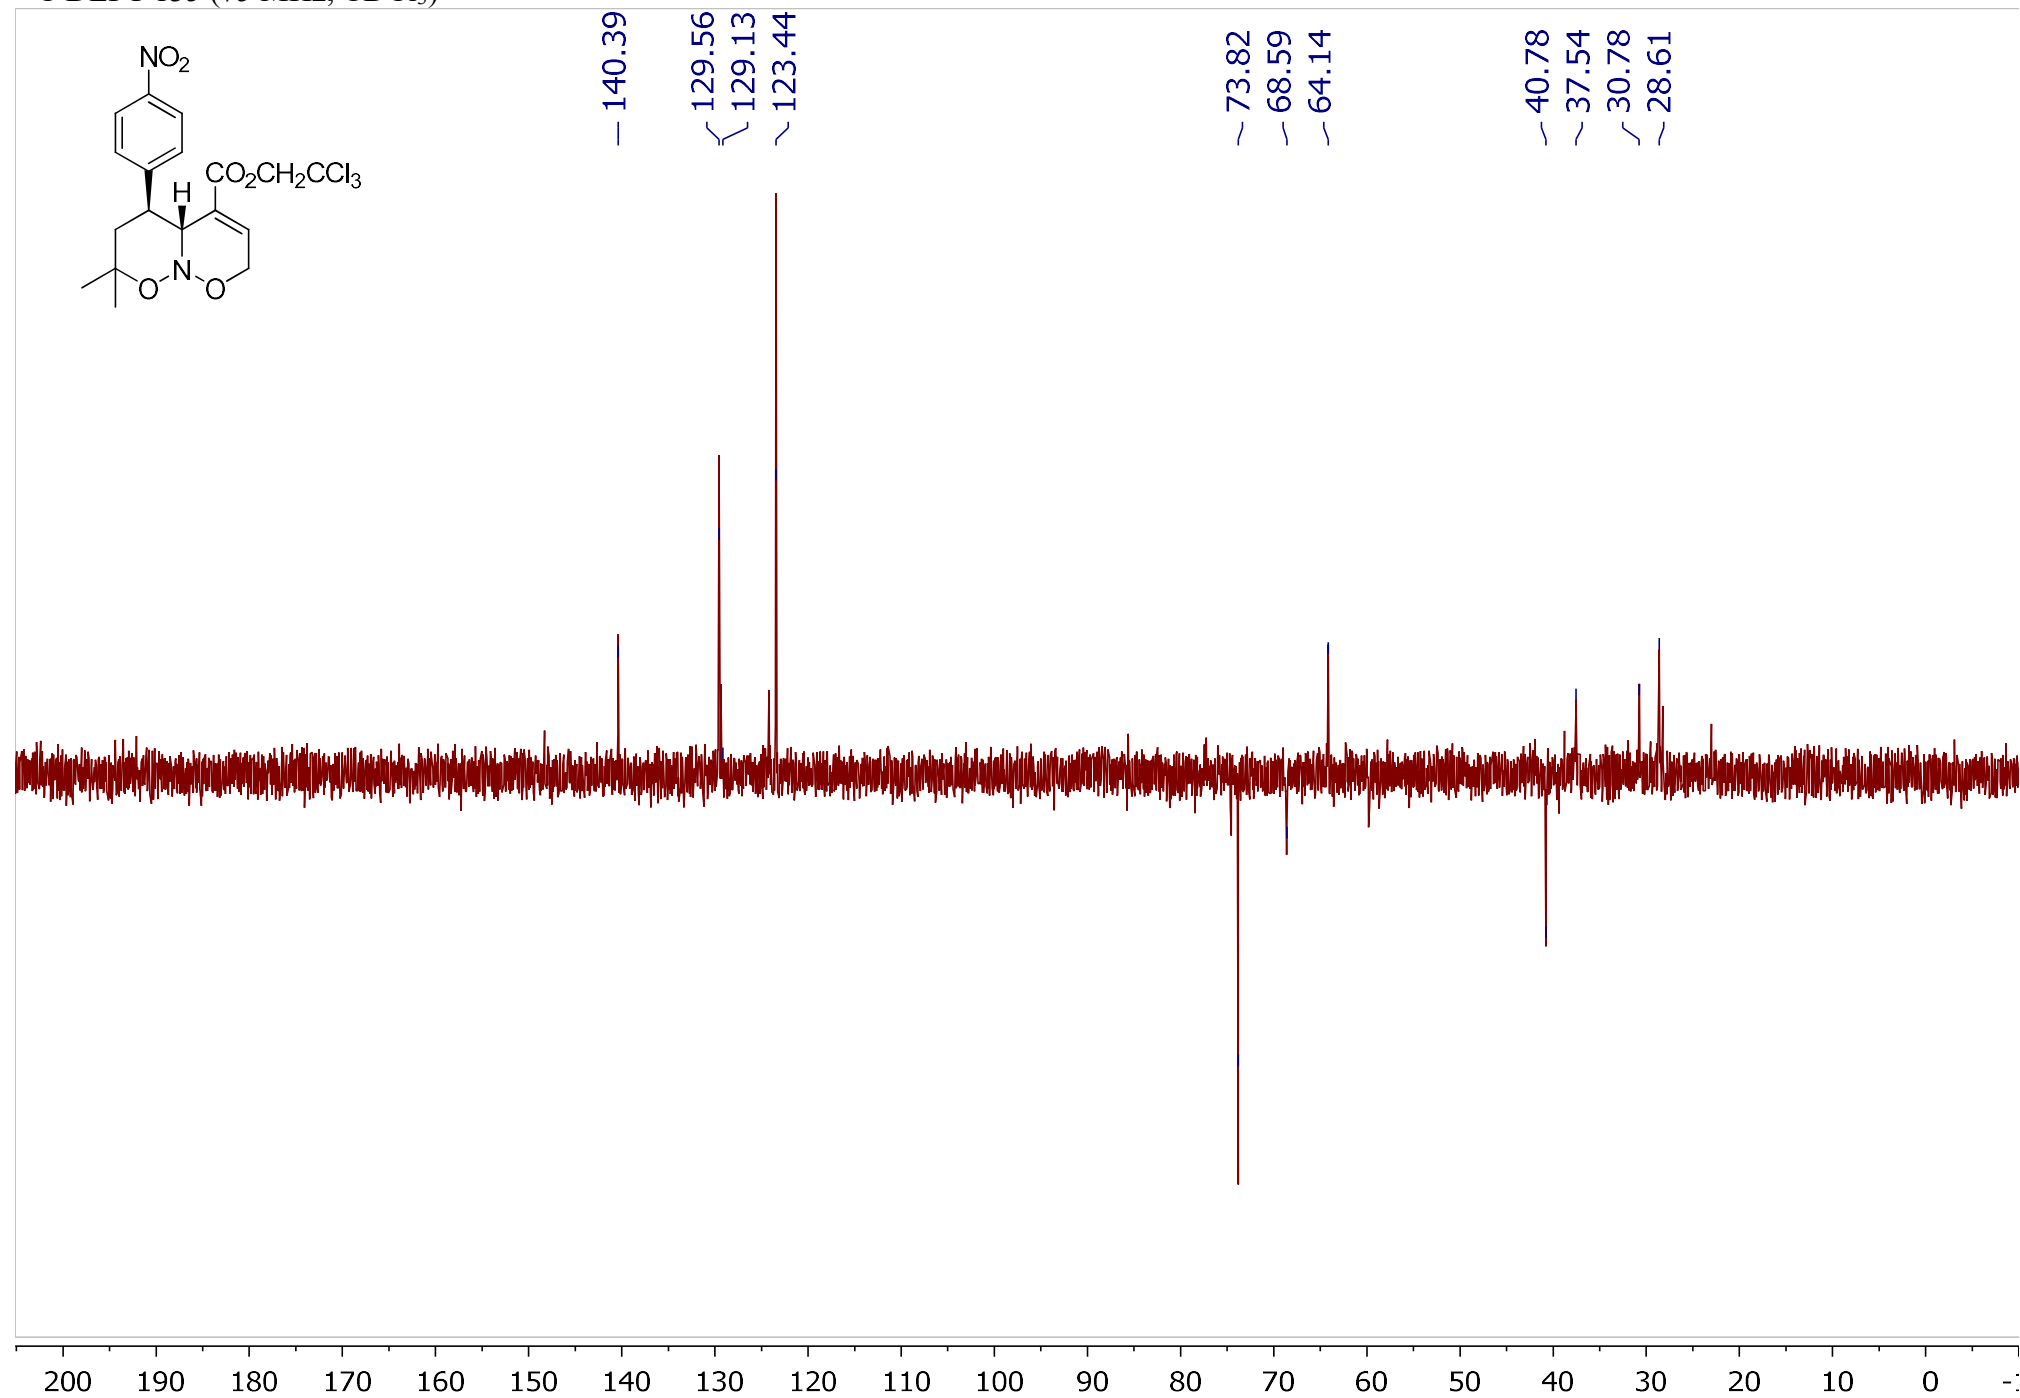

**2,2,2-Trichloroethyl (4aR\*,5S\*)-5-(3-methoxyphenyl)-7,7-dimethyl-4a,5,6,7-tetrahydro-2H-[1,2]oxazino[2,3-b][1,2]oxazine-4-carboxylate 3i**

<sup>1</sup>H NMR (300 MHz, CDCl<sub>3</sub>)

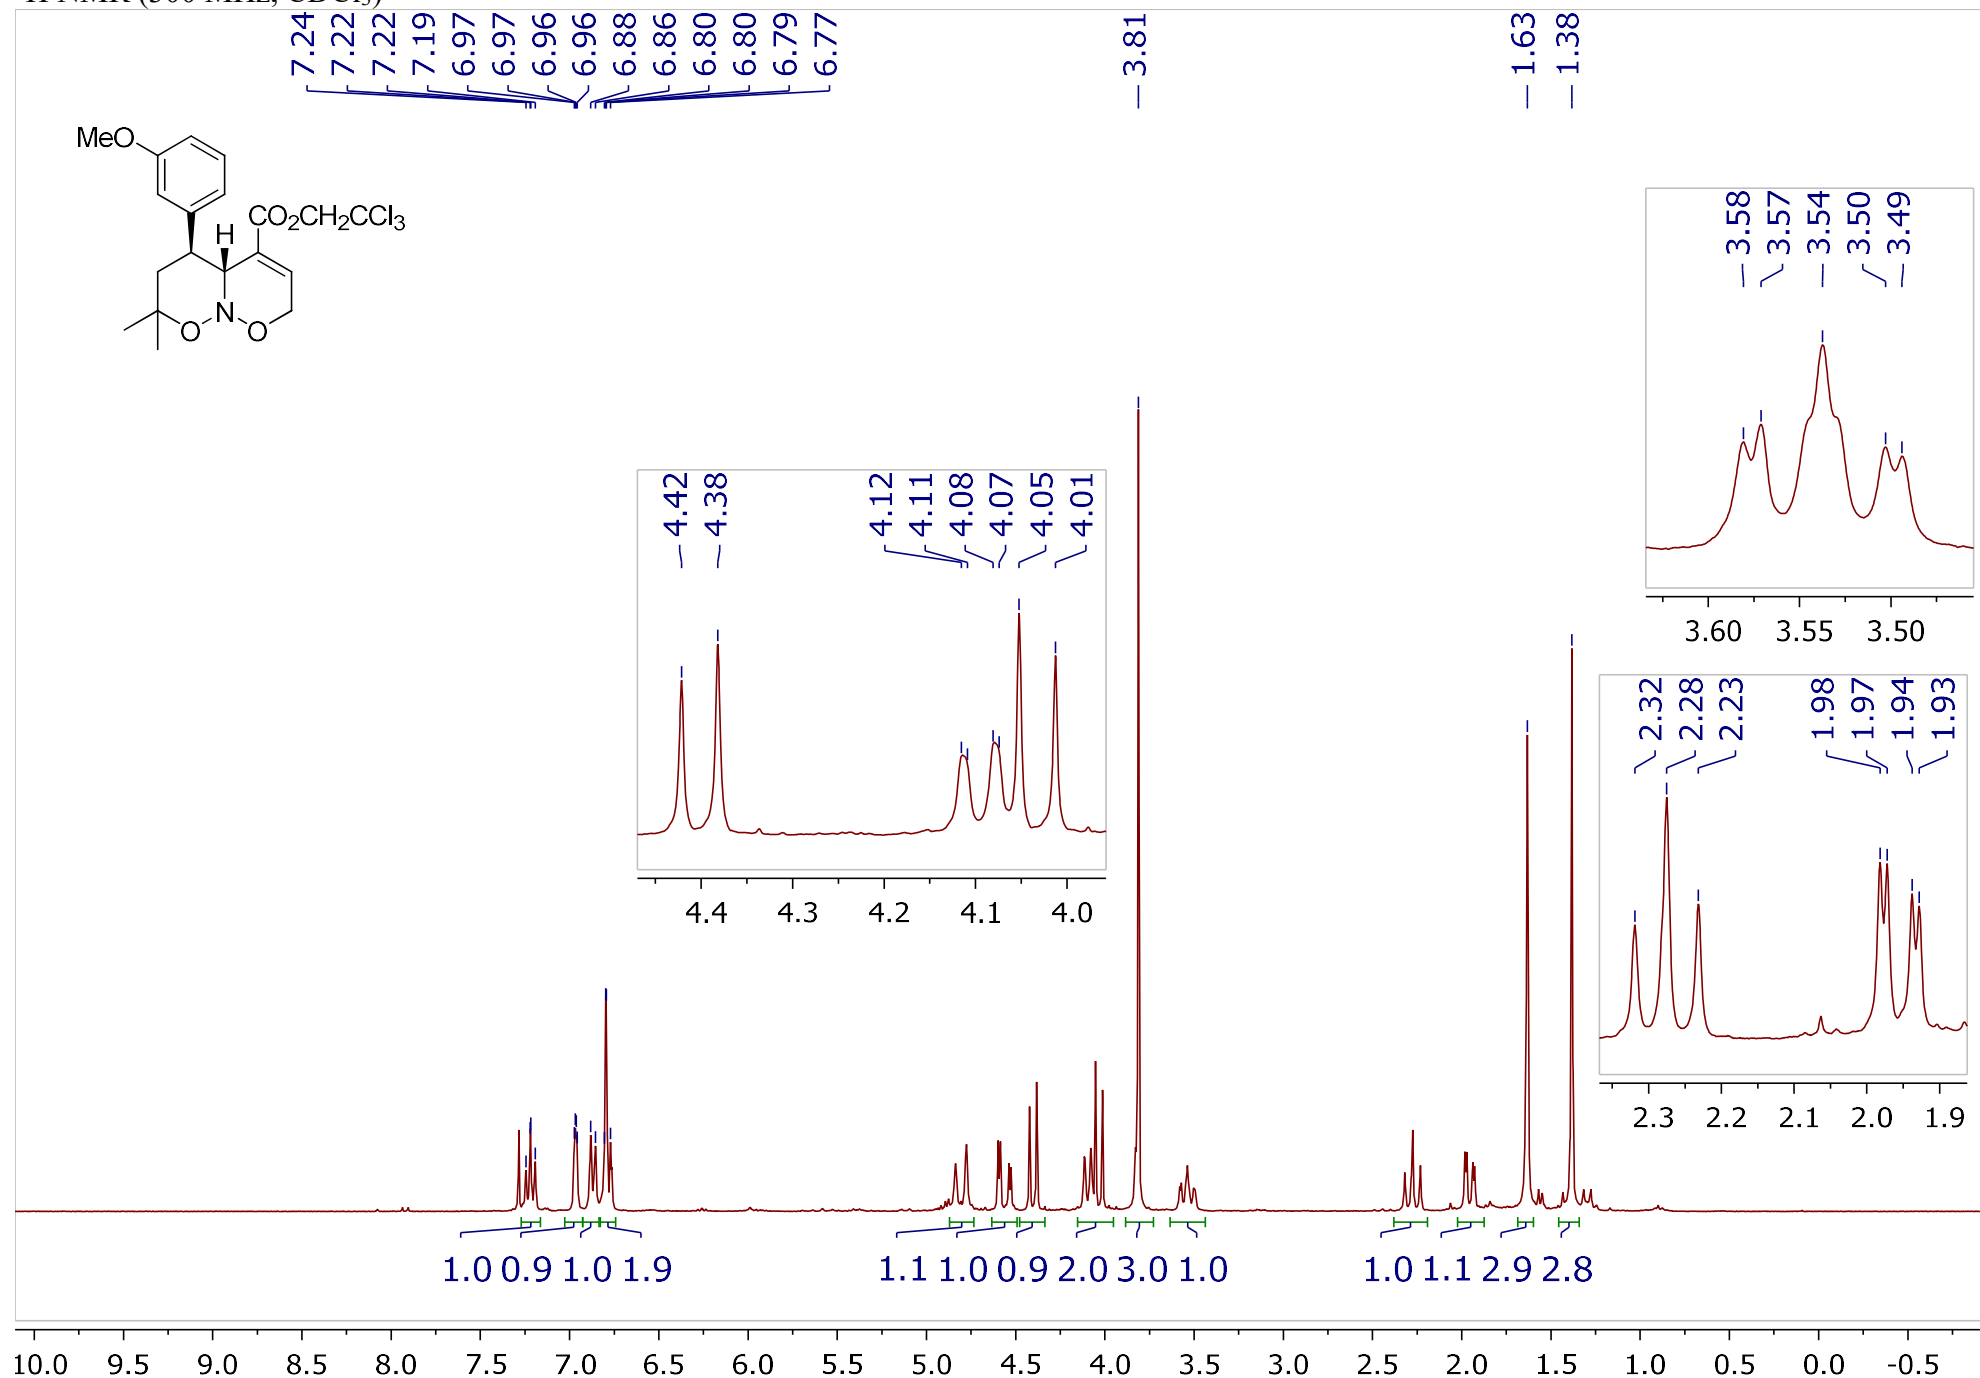



<sup>13</sup>C NMR (75 MHz, CDCl<sub>3</sub>)

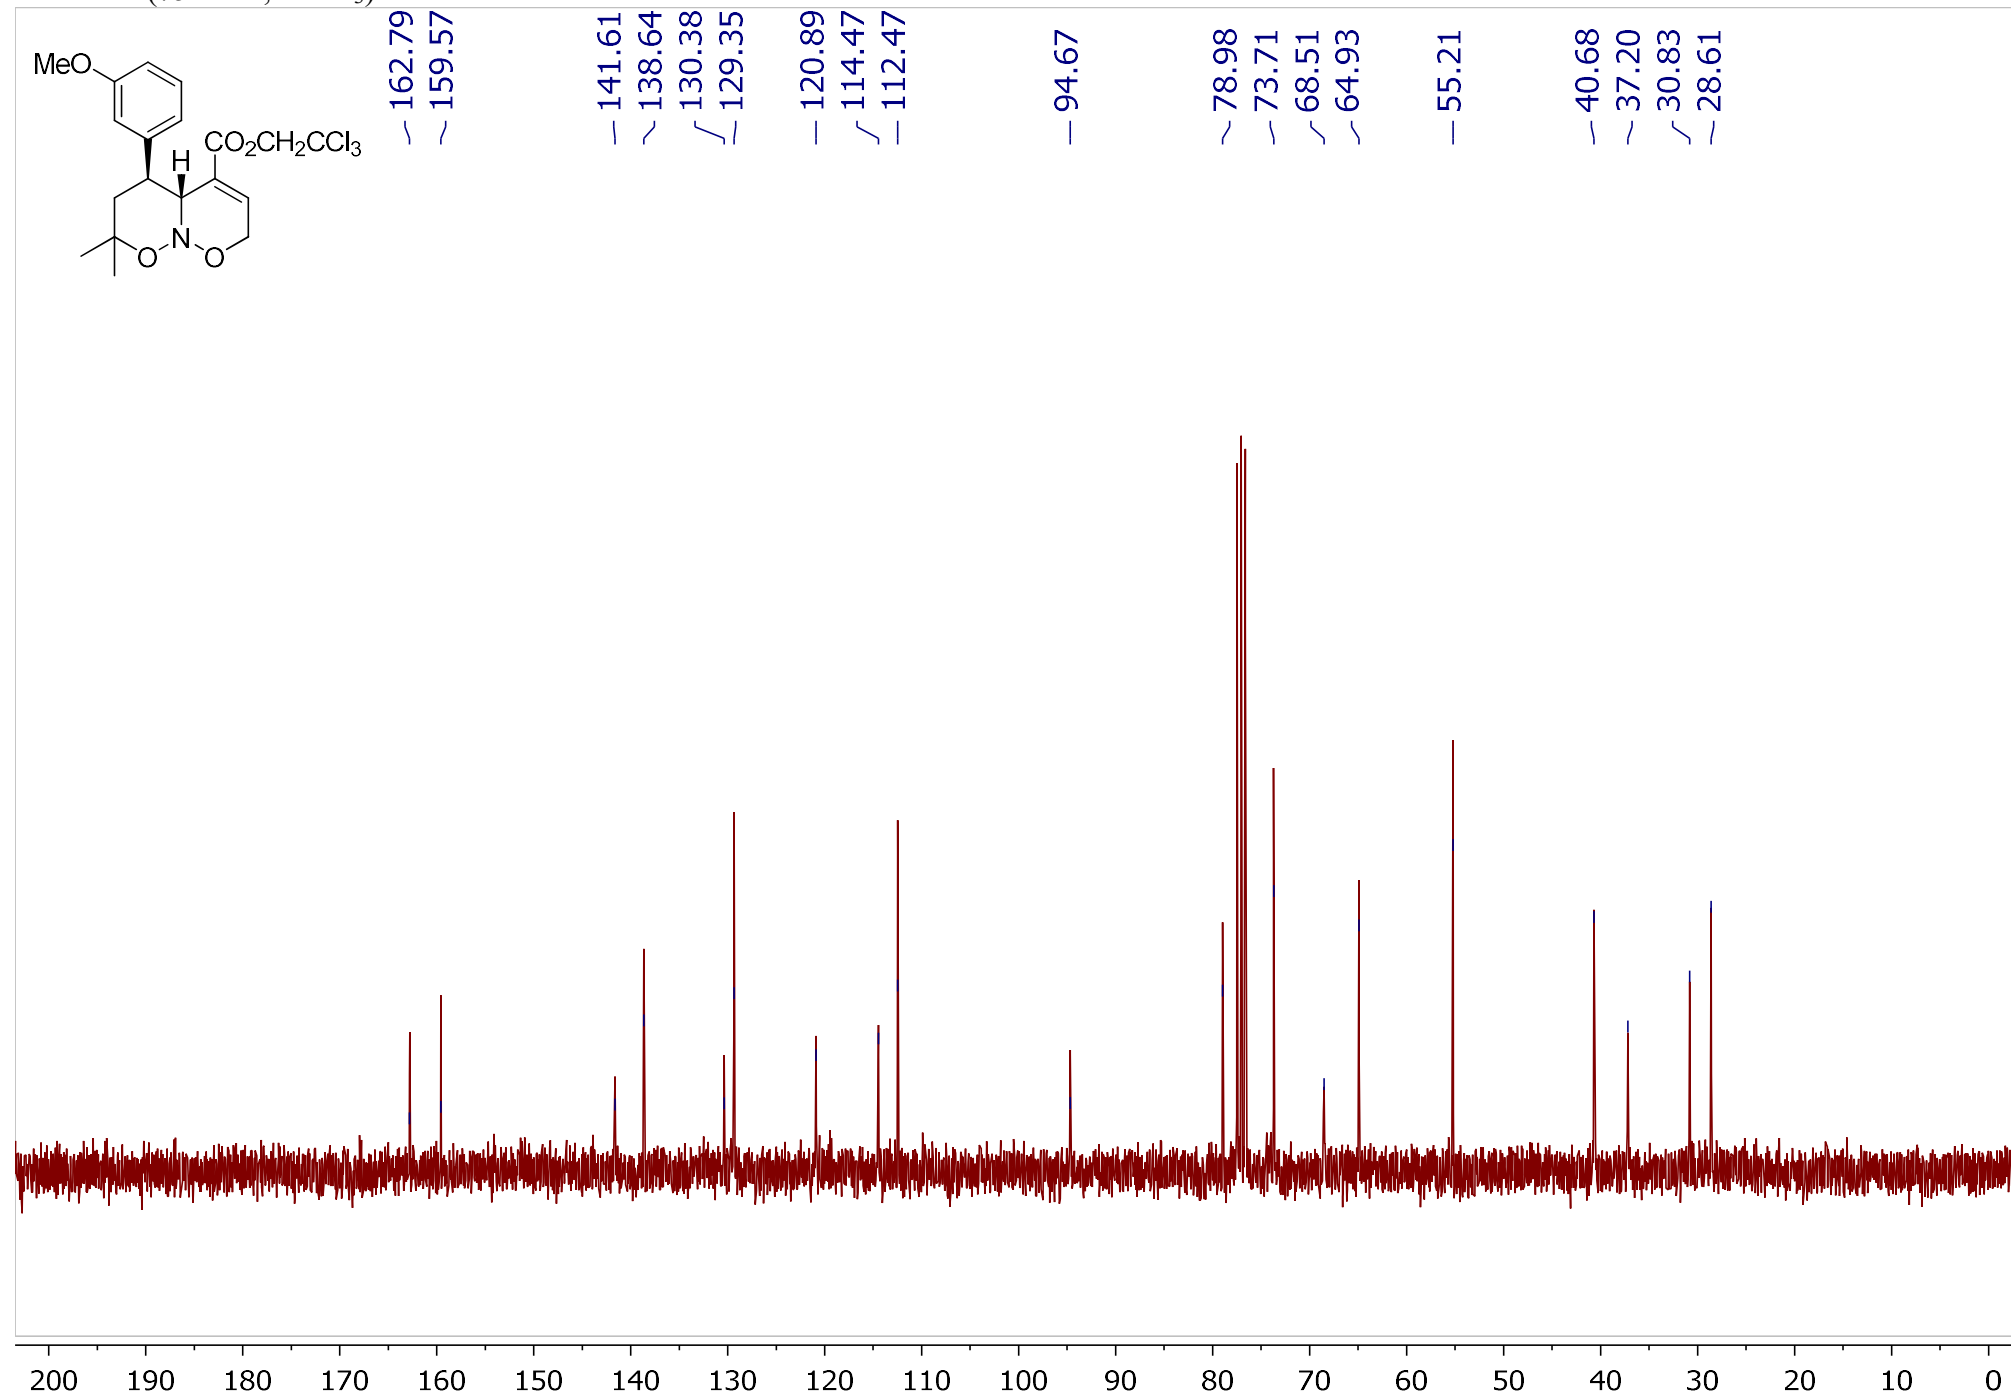

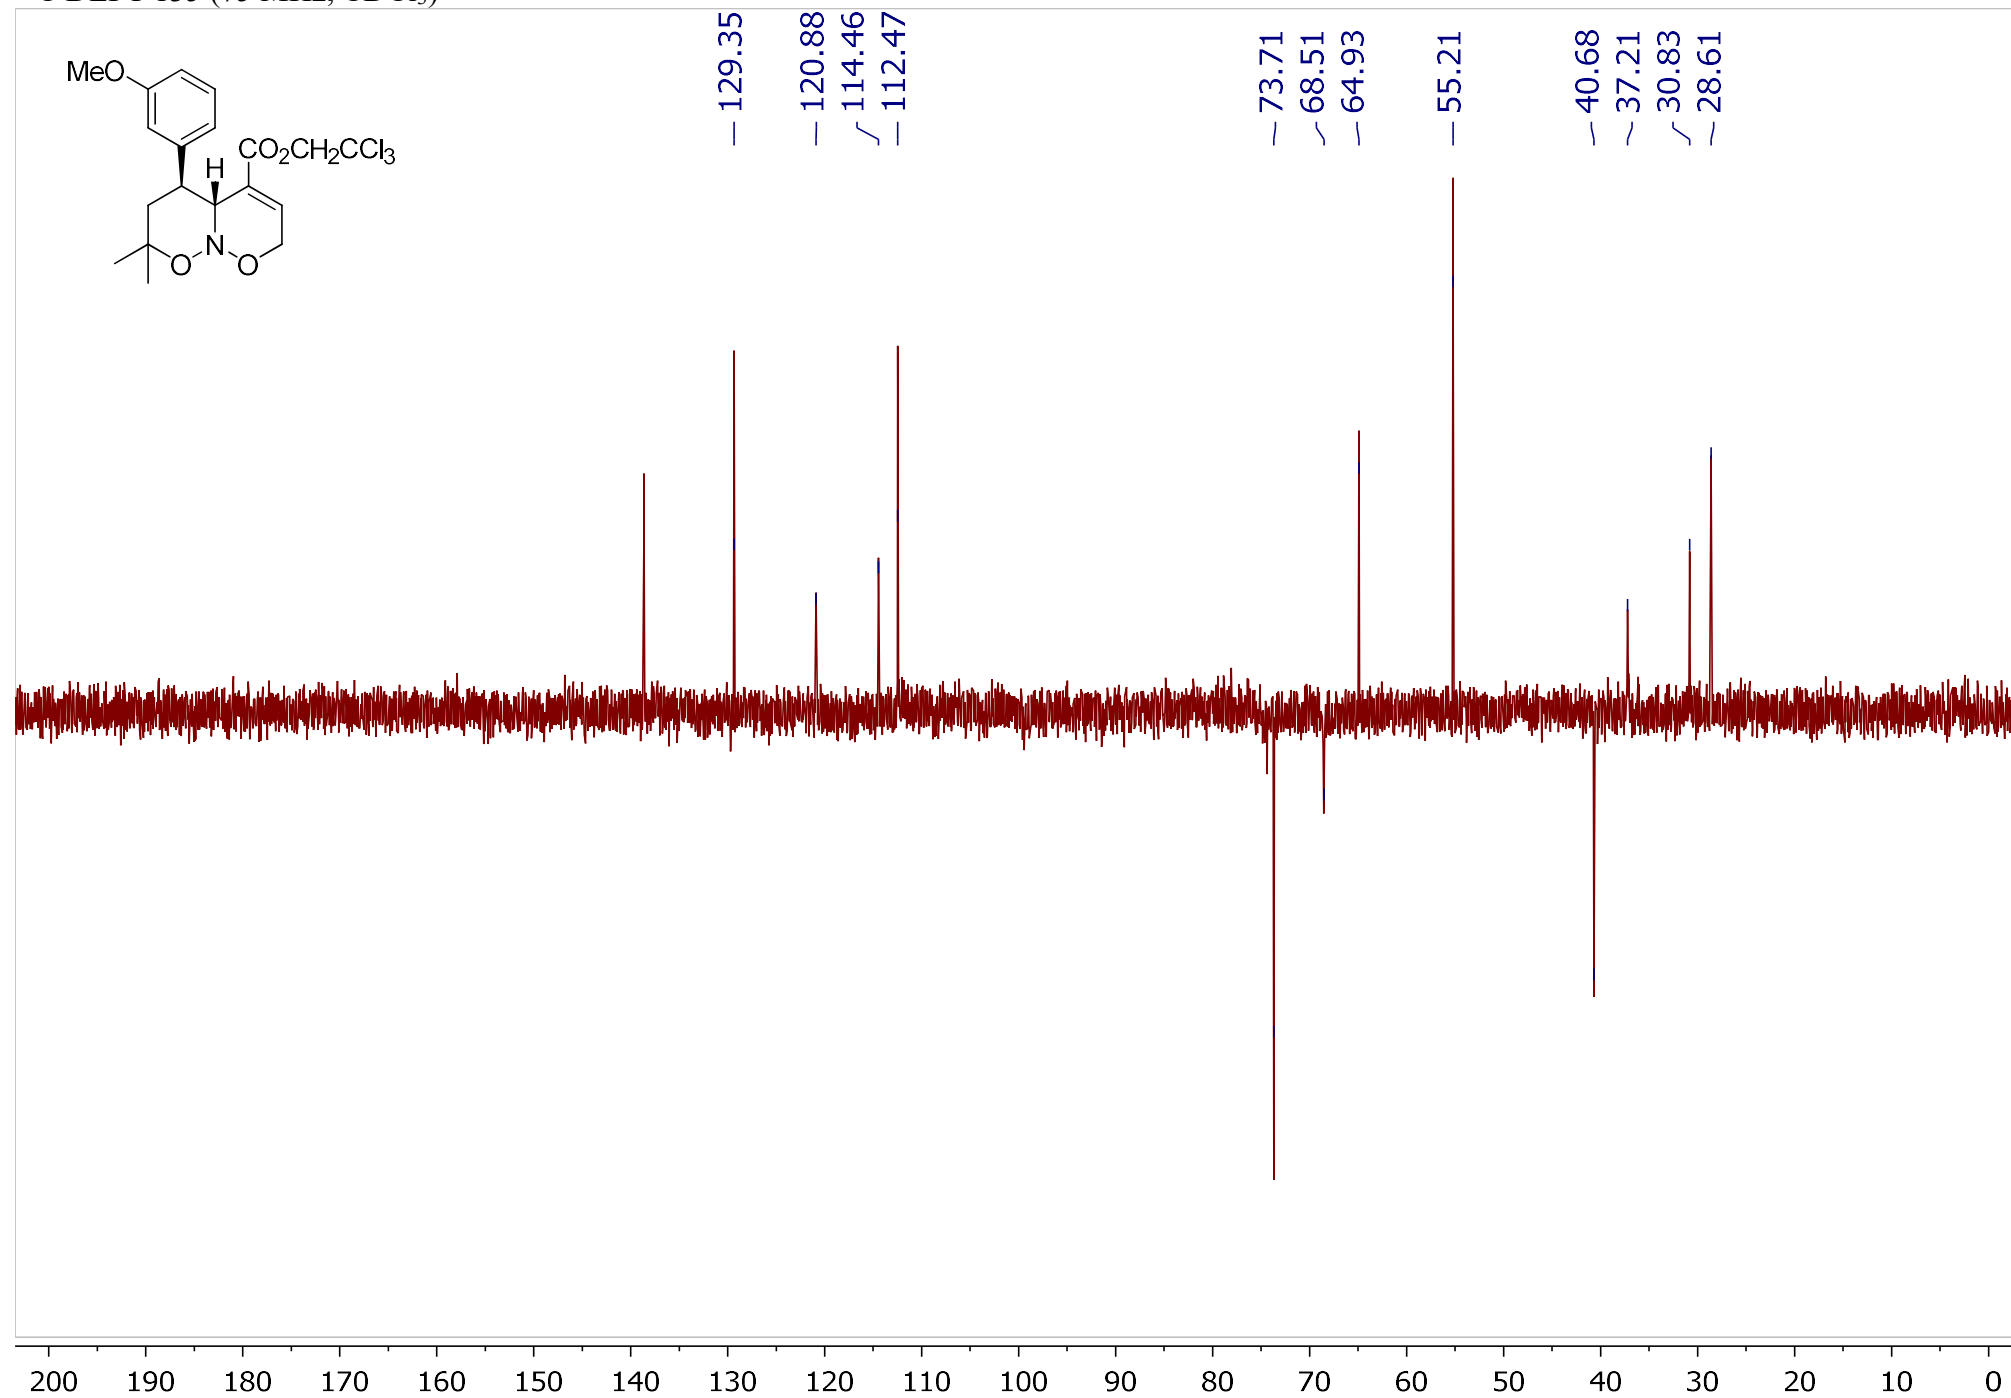

**2,2,2-Trichloroethyl (4aR\*,5S\*)-5-(2-chlorophenyl)-7,7-dimethyl-4a,5,6,7-tetrahydro-2H-[1,2]oxazino[2,3-b][1,2]oxazine-4-carboxylate 3j**

<sup>1</sup>H NMR (300 MHz, CDCl<sub>3</sub>)

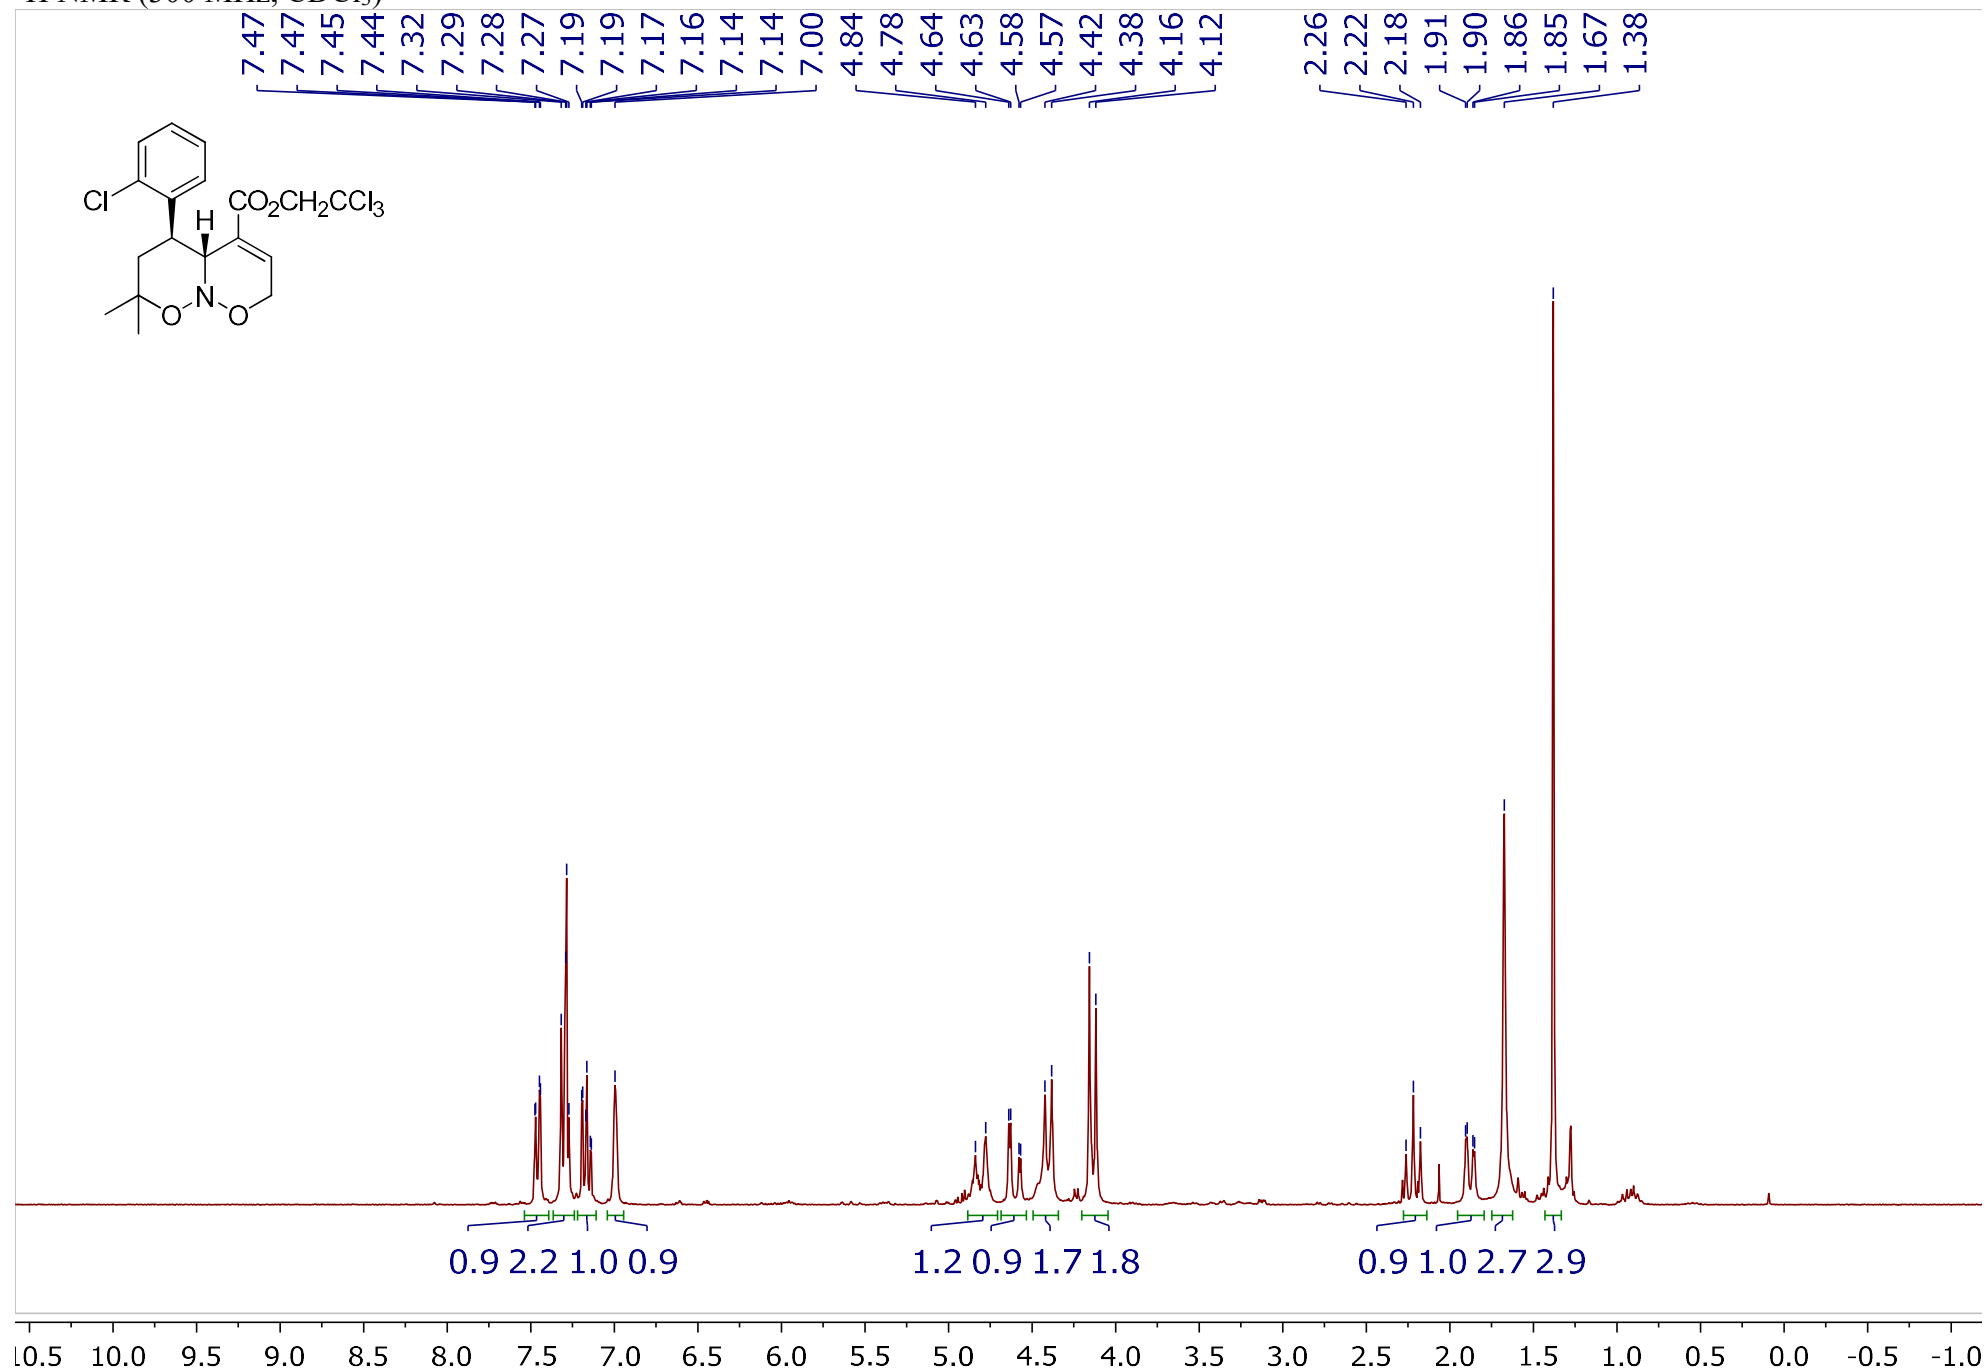

$^{13}\text{C}$  NMR (75 MHz,  $\text{CDCl}_3$ )

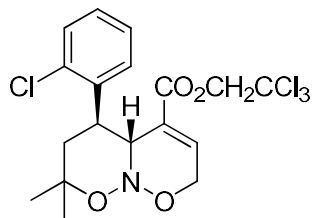

— 162.75

139.61

137.63

134.37

129.81

129.47

129.14

128.13

126.92

— 94.68

~ 78.91

— 73.72

~ 68.47

~ 64.45

— 41.23

~ 32.10

~ 30.72

~ 28.66

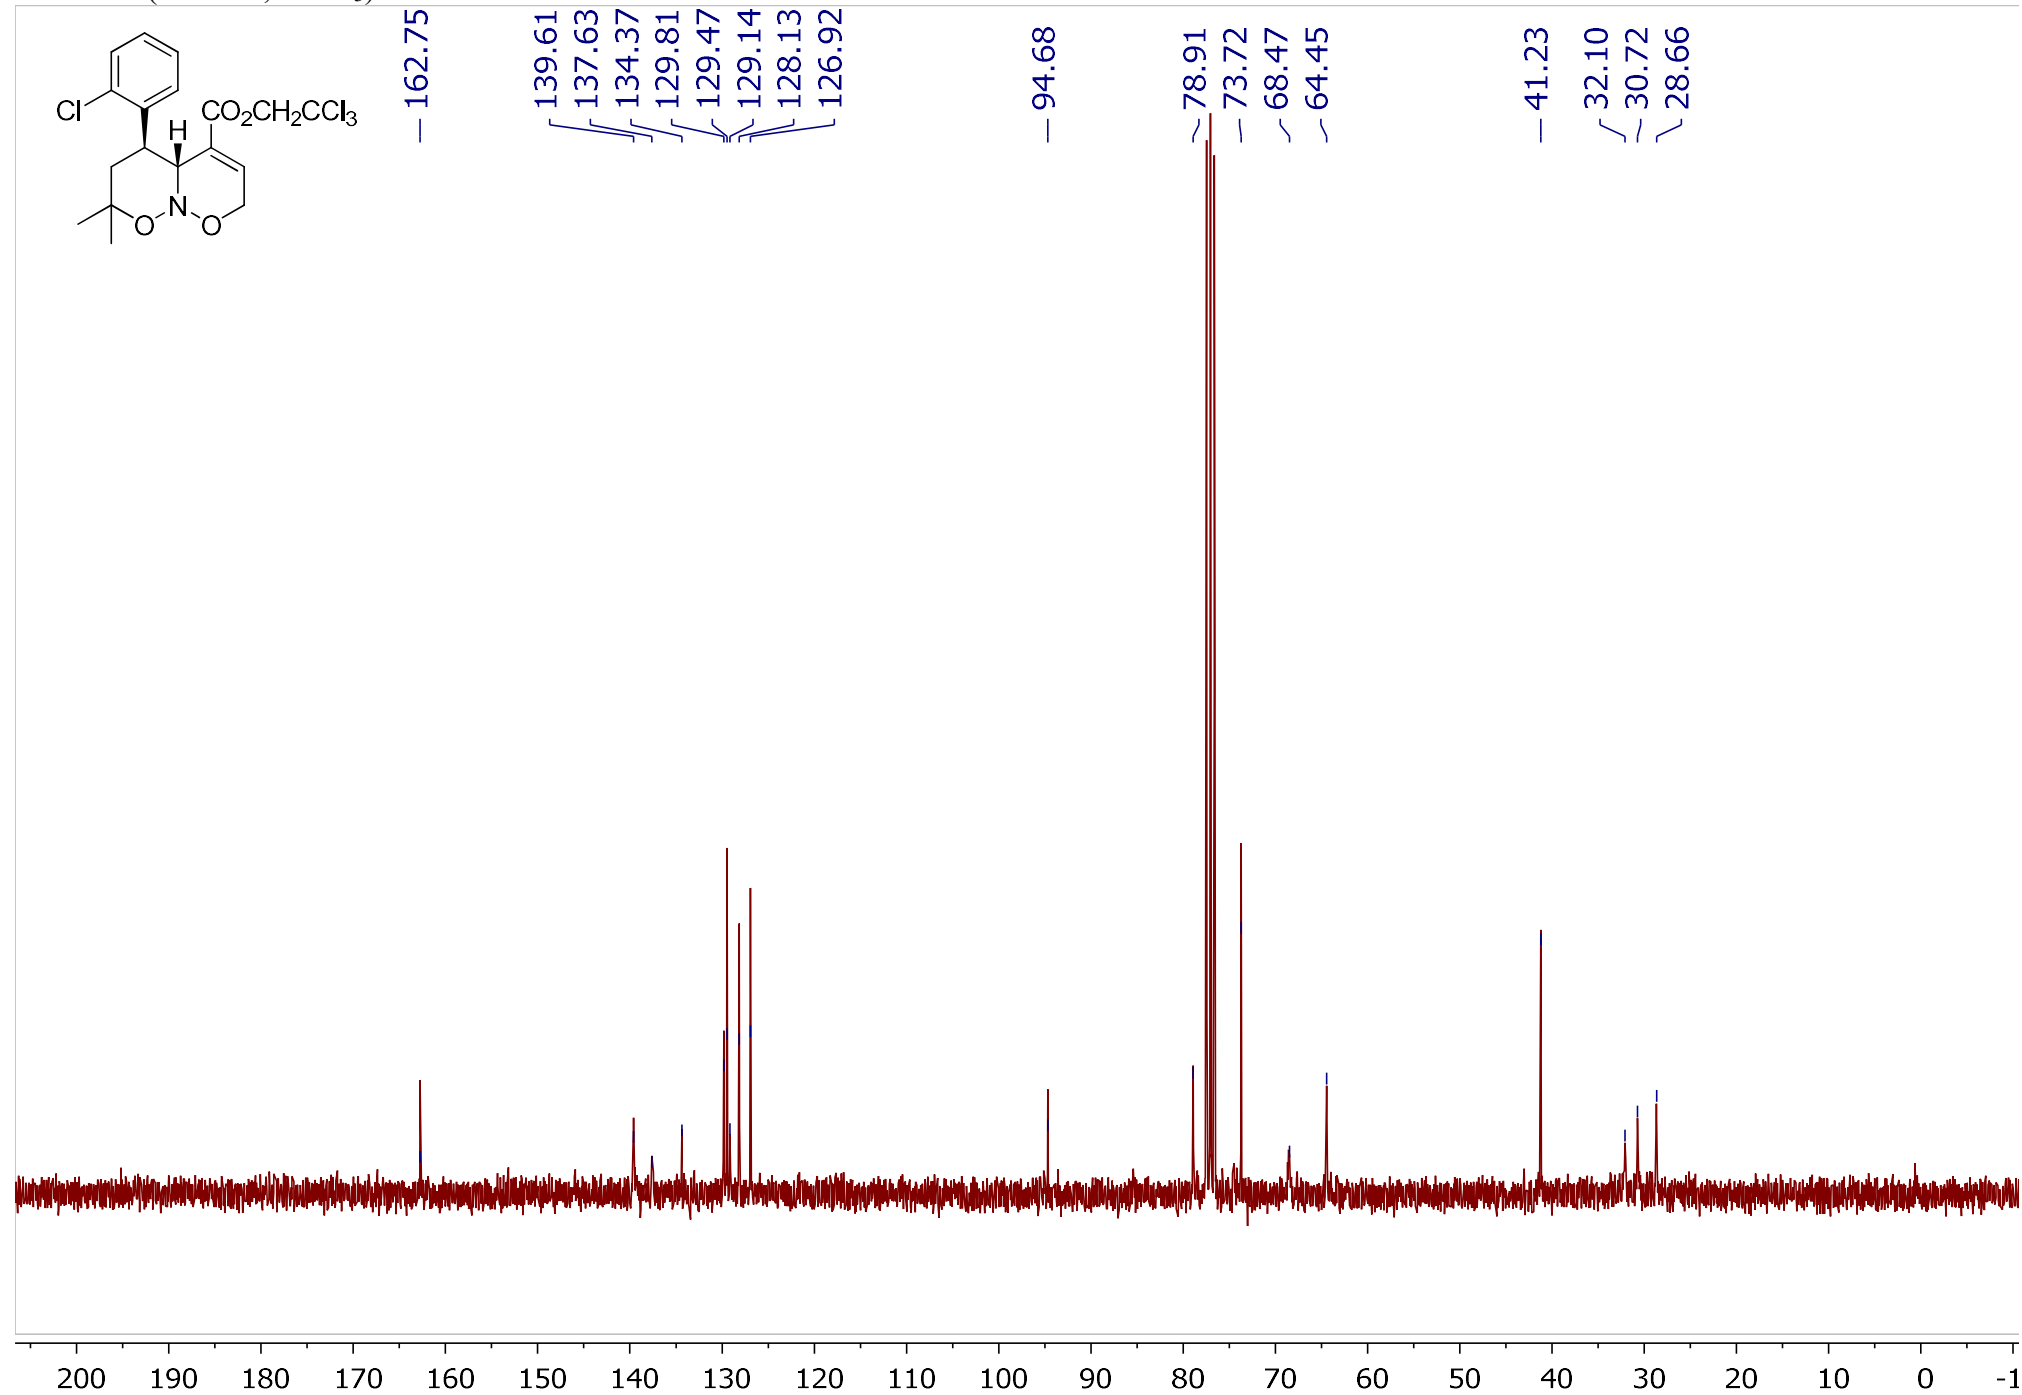

<sup>13</sup>C DEPT 135 (75 MHz, CDCl<sub>3</sub>)

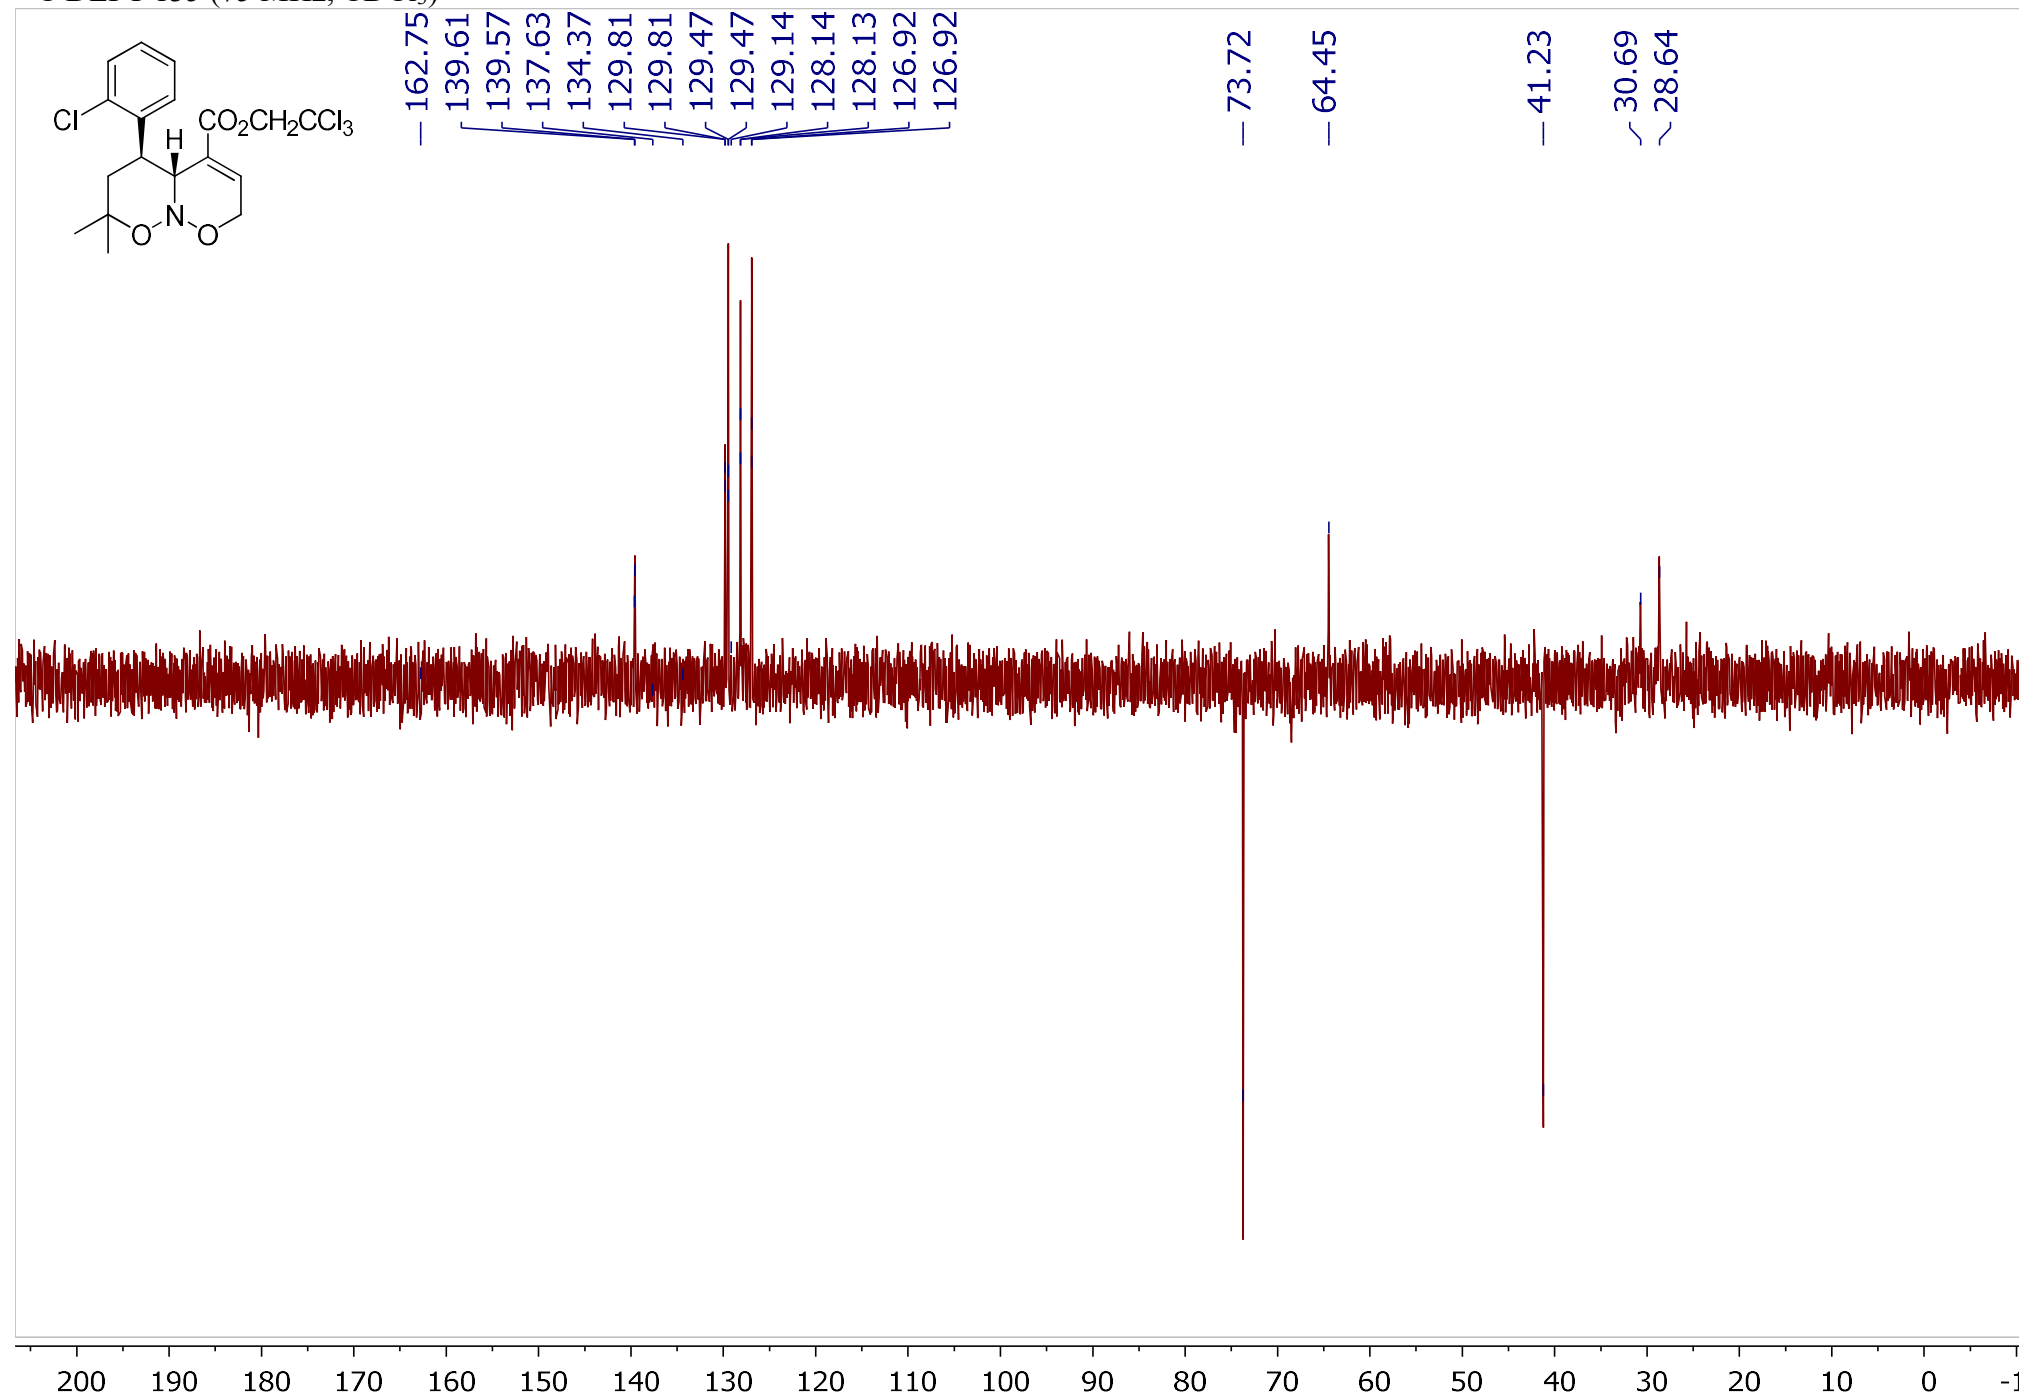

**2,2,2-Trichloroethyl (4aR\*,5S\*)-5-(3-(cyclopentyloxy)-4-methoxyphenyl)-7,7-dimethyl-4a,5,6,7-tetrahydro-2H-[1,2]oxazino[2,3-b][1,2]oxazine-4-carboxylate 3k**

$^1\text{H}$  NMR (300 MHz,  $\text{CDCl}_3$ )

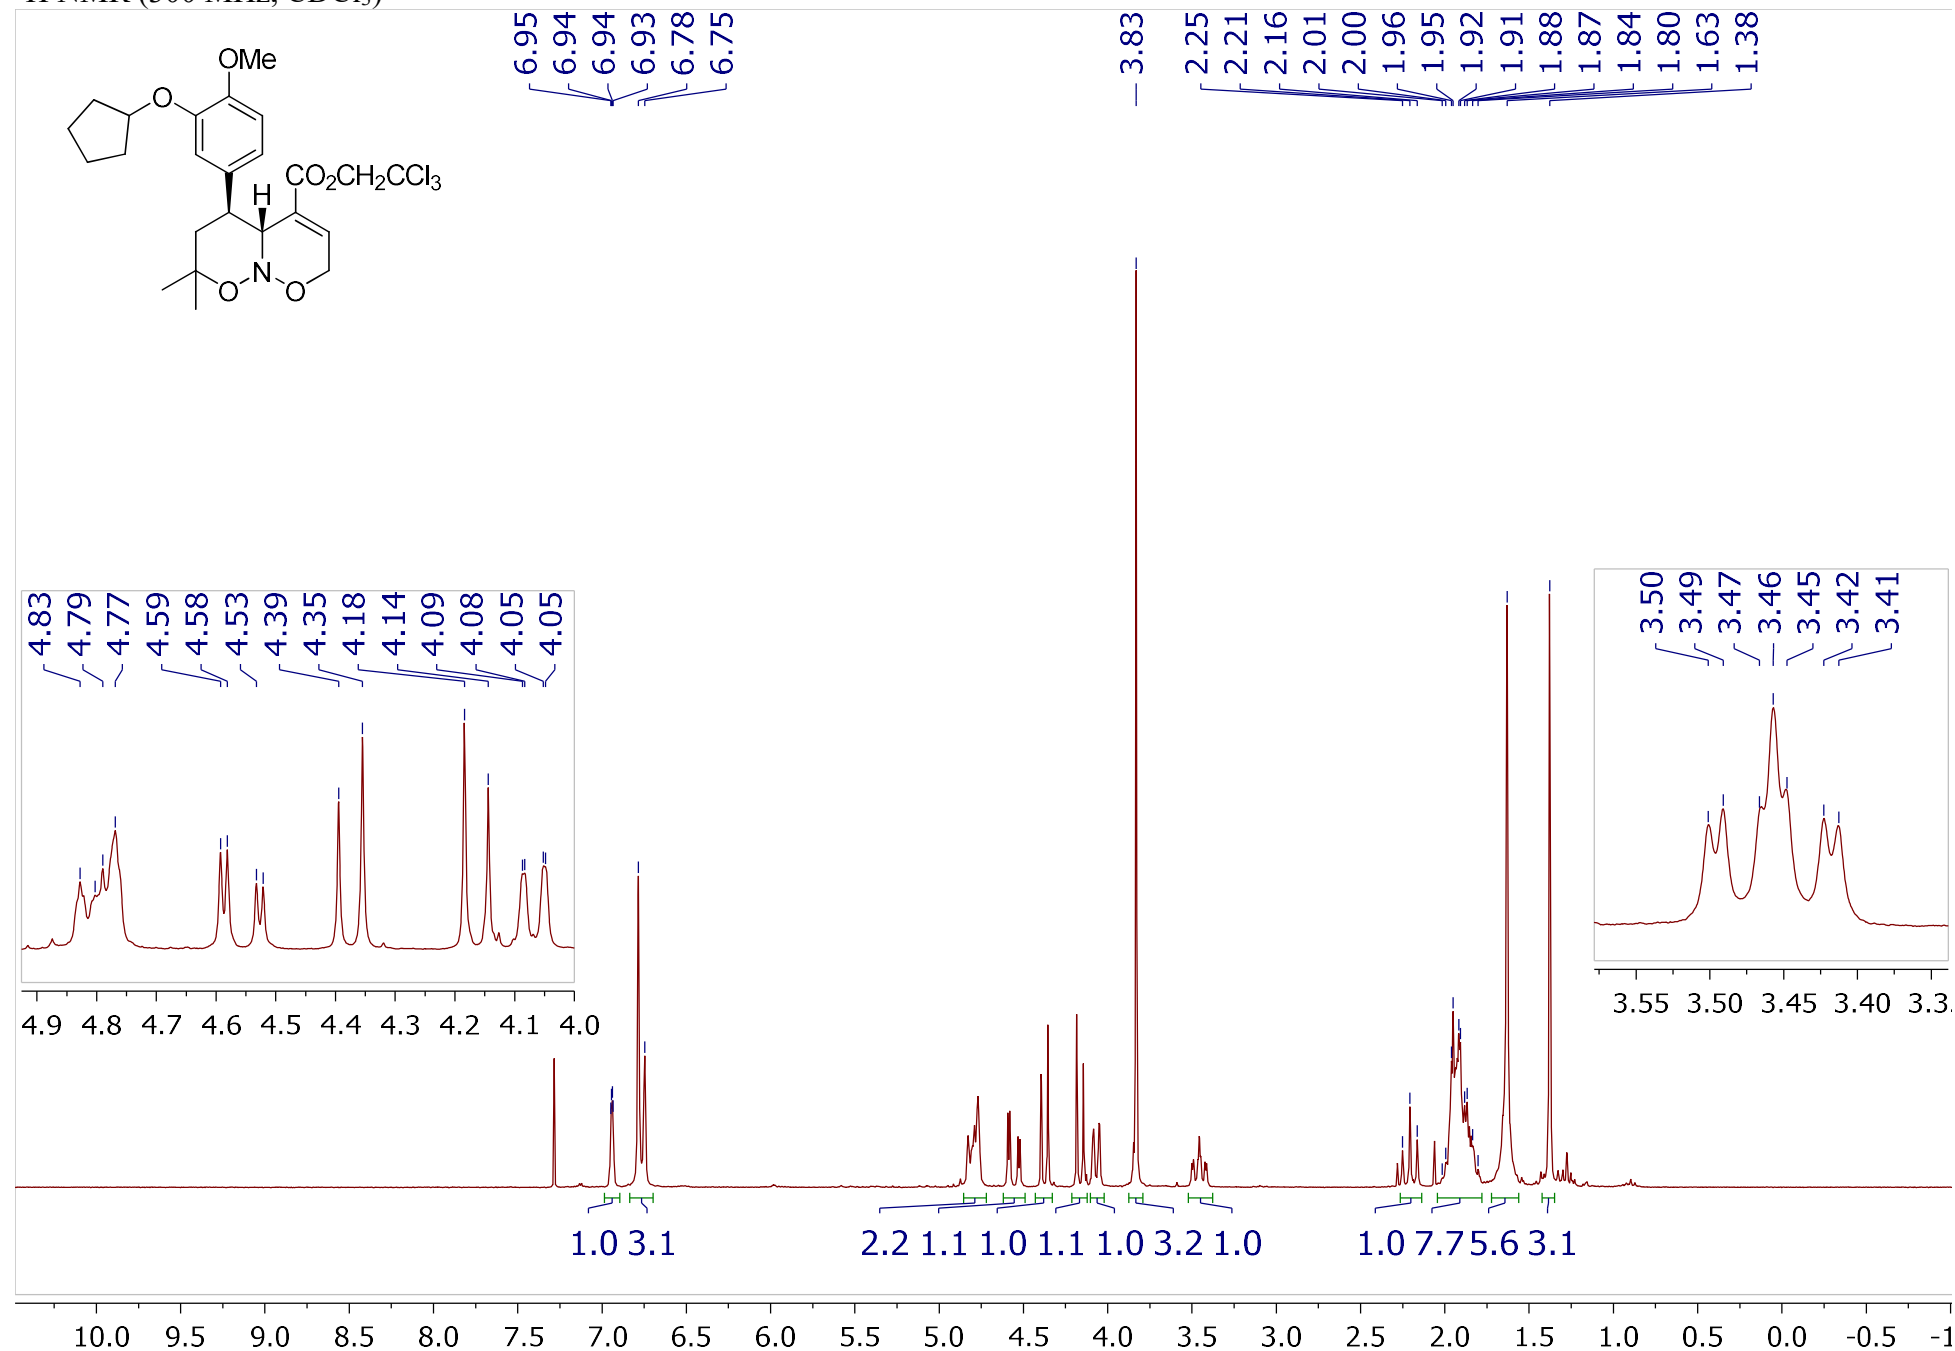

<sup>13</sup>C NMR (75 MHz, CDCl<sub>3</sub>)

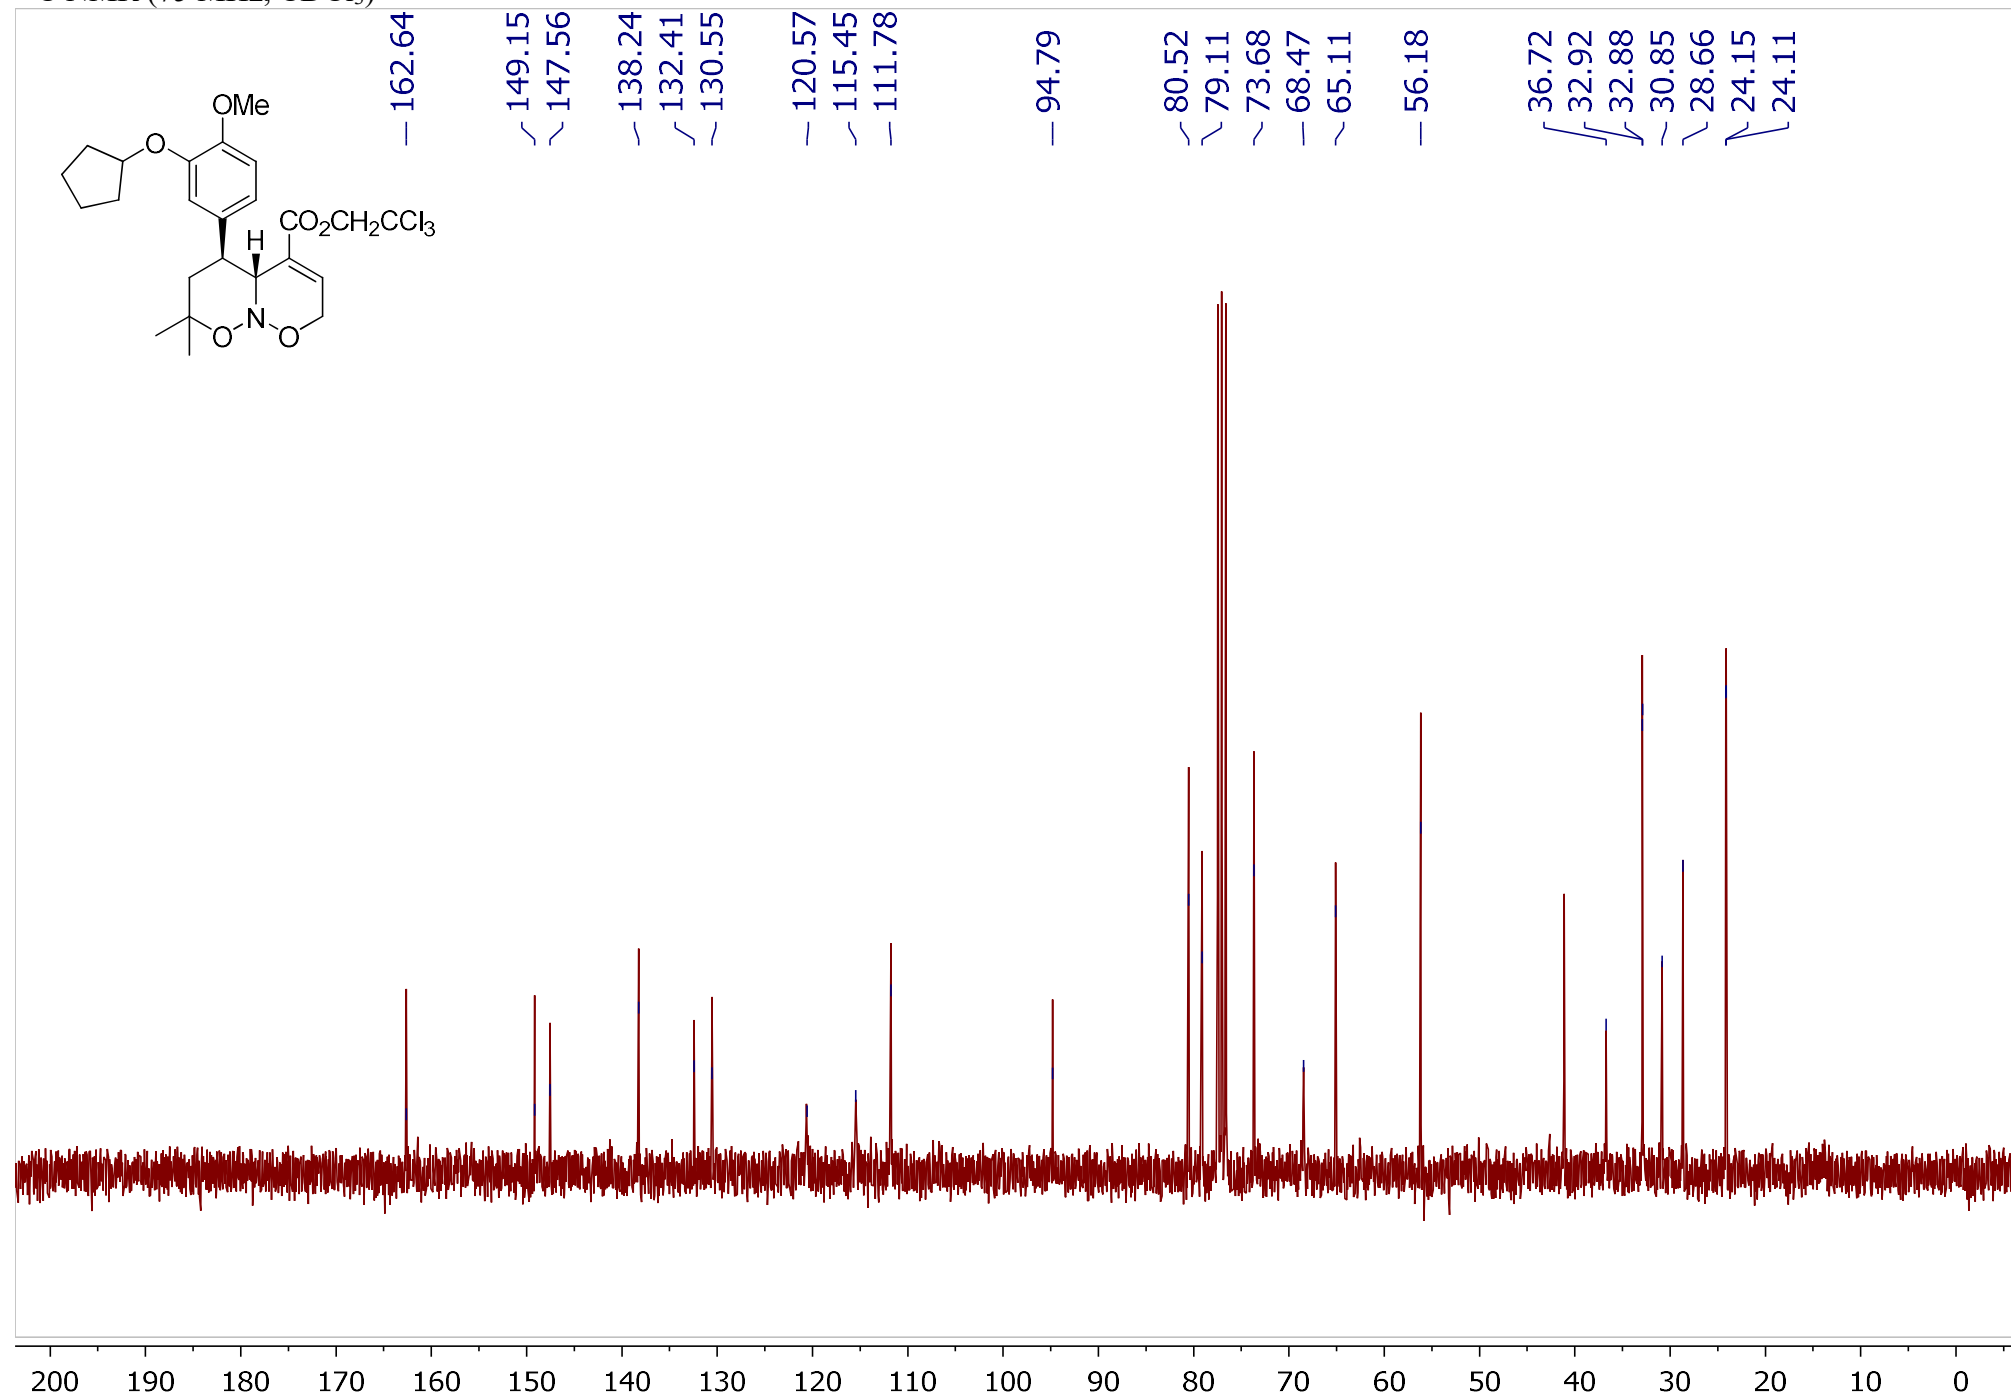

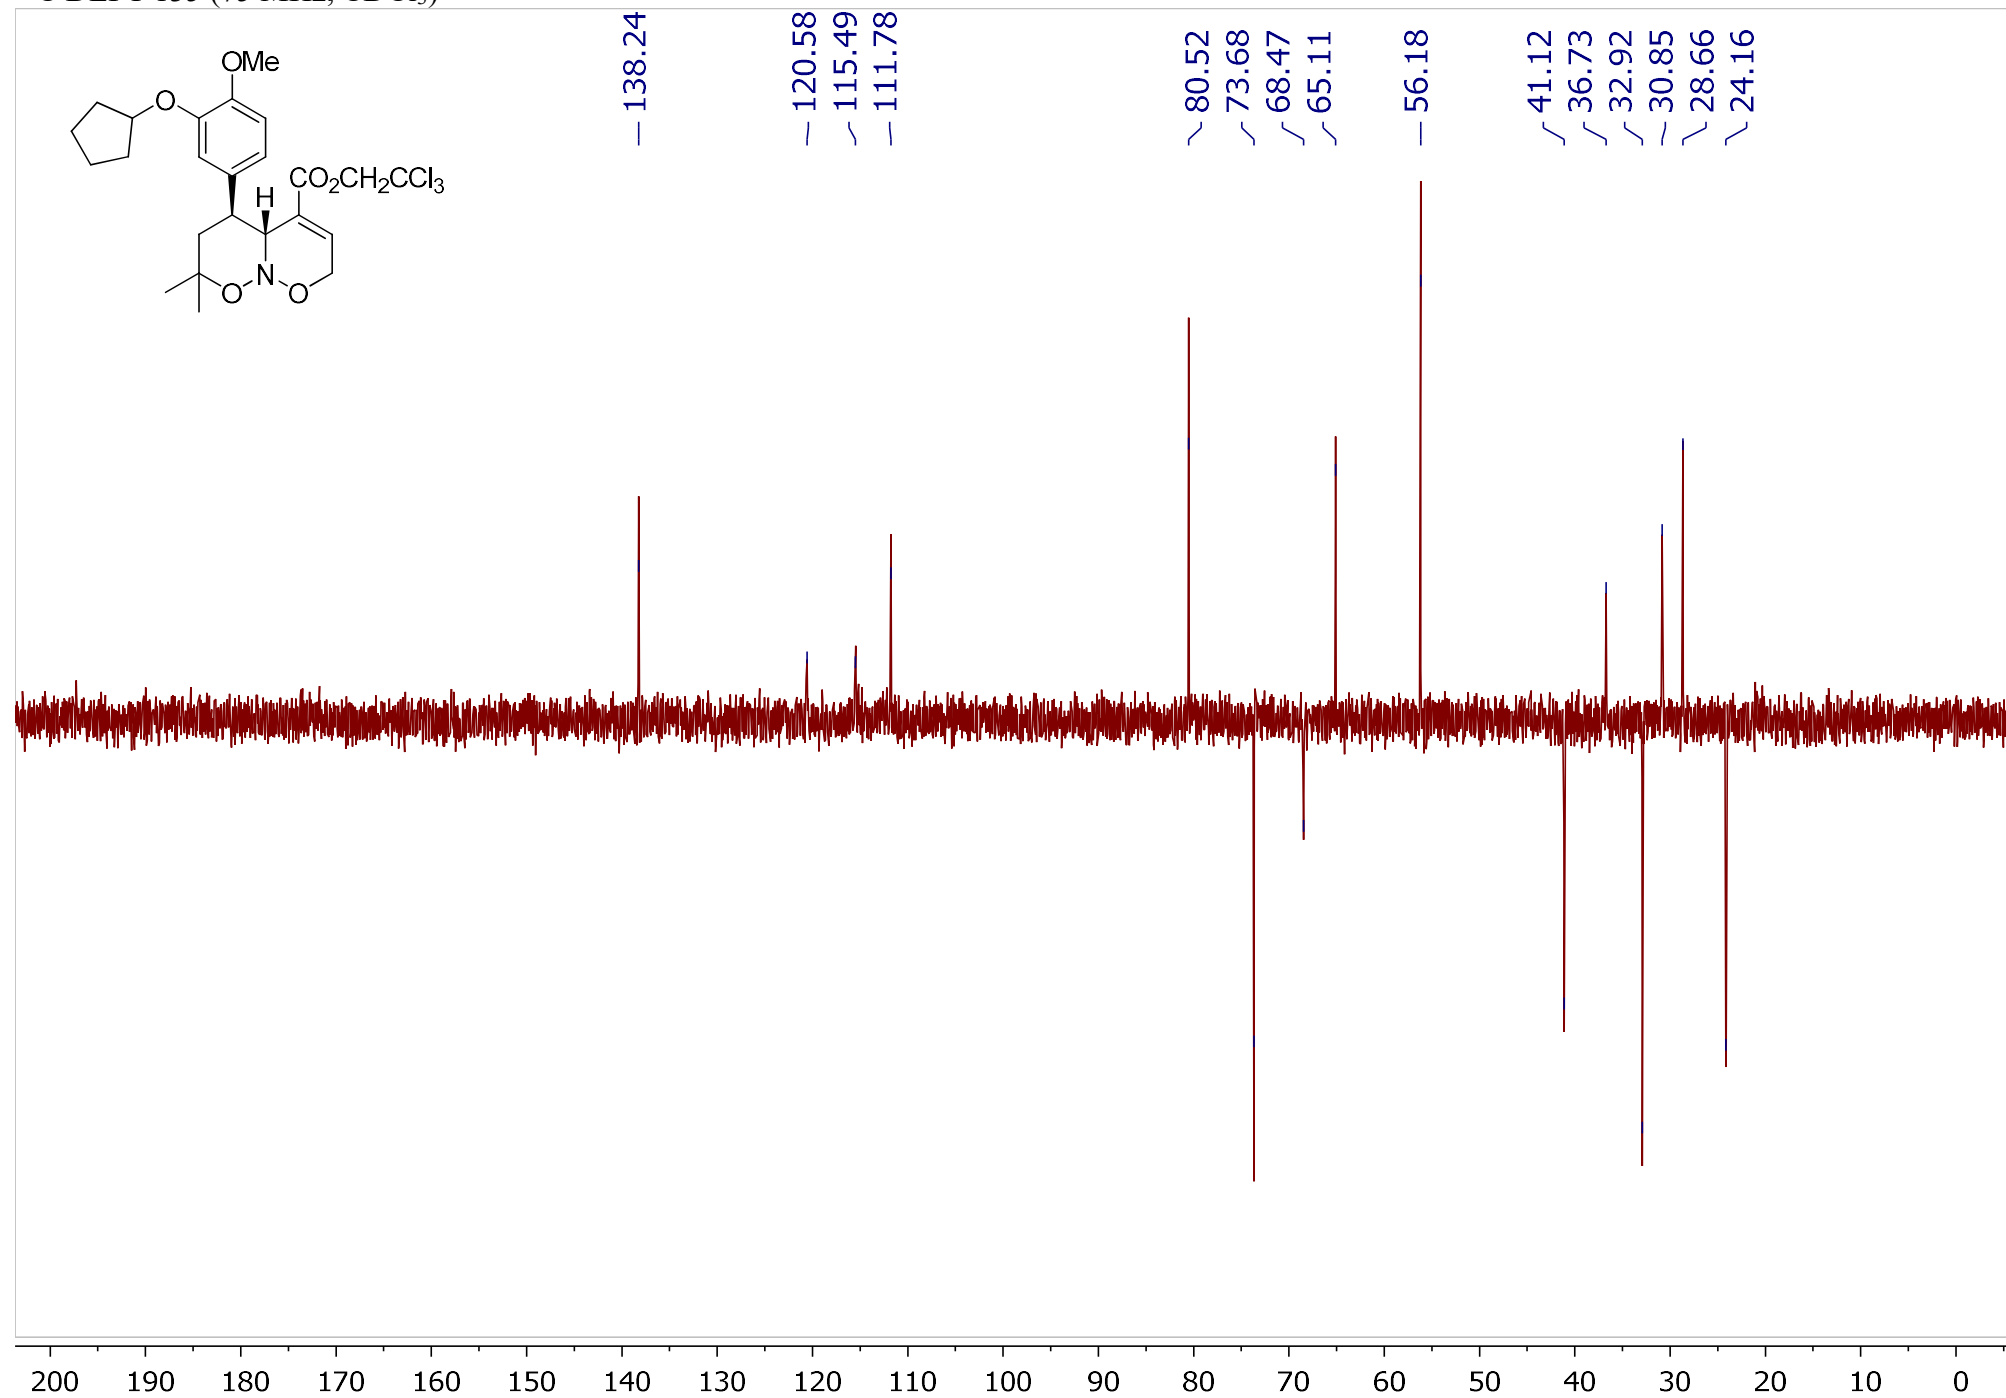



**2,2,2-Trichloroethyl (4aS\*,5R\*)-5-(benzyloxy)-7,7-dimethyl-4a,5,6,7-tetrahydro-2H-[1,2]oxazino[2,3-b][1,2]oxazine-4-carboxylate 3l**

<sup>1</sup>H NMR (300 MHz, CDCl<sub>3</sub>, 320K)

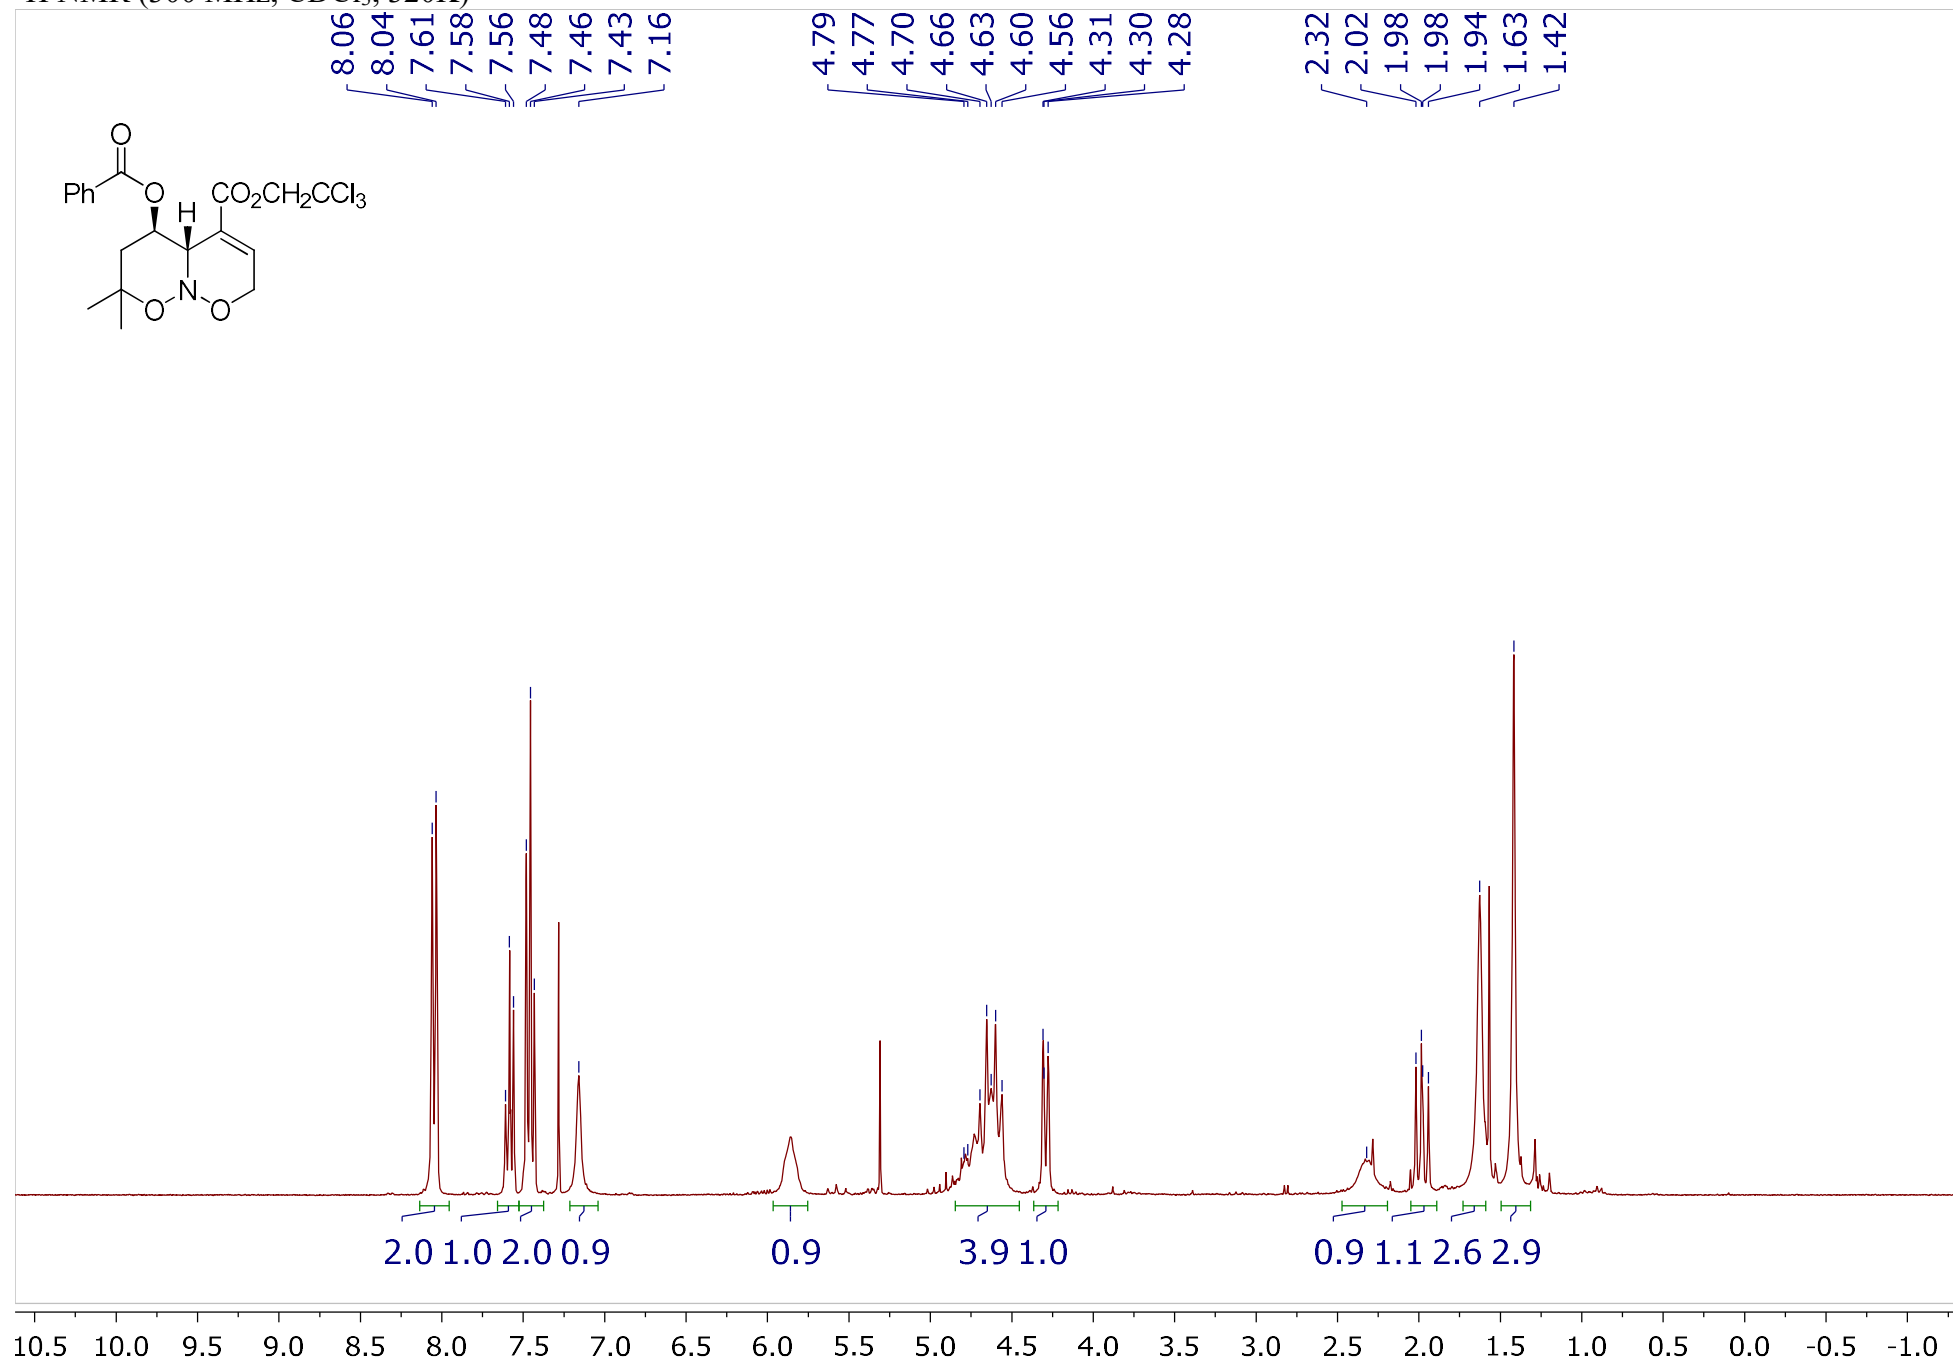

<sup>13</sup>C NMR (75 MHz, CDCl<sub>3</sub>, 320K)

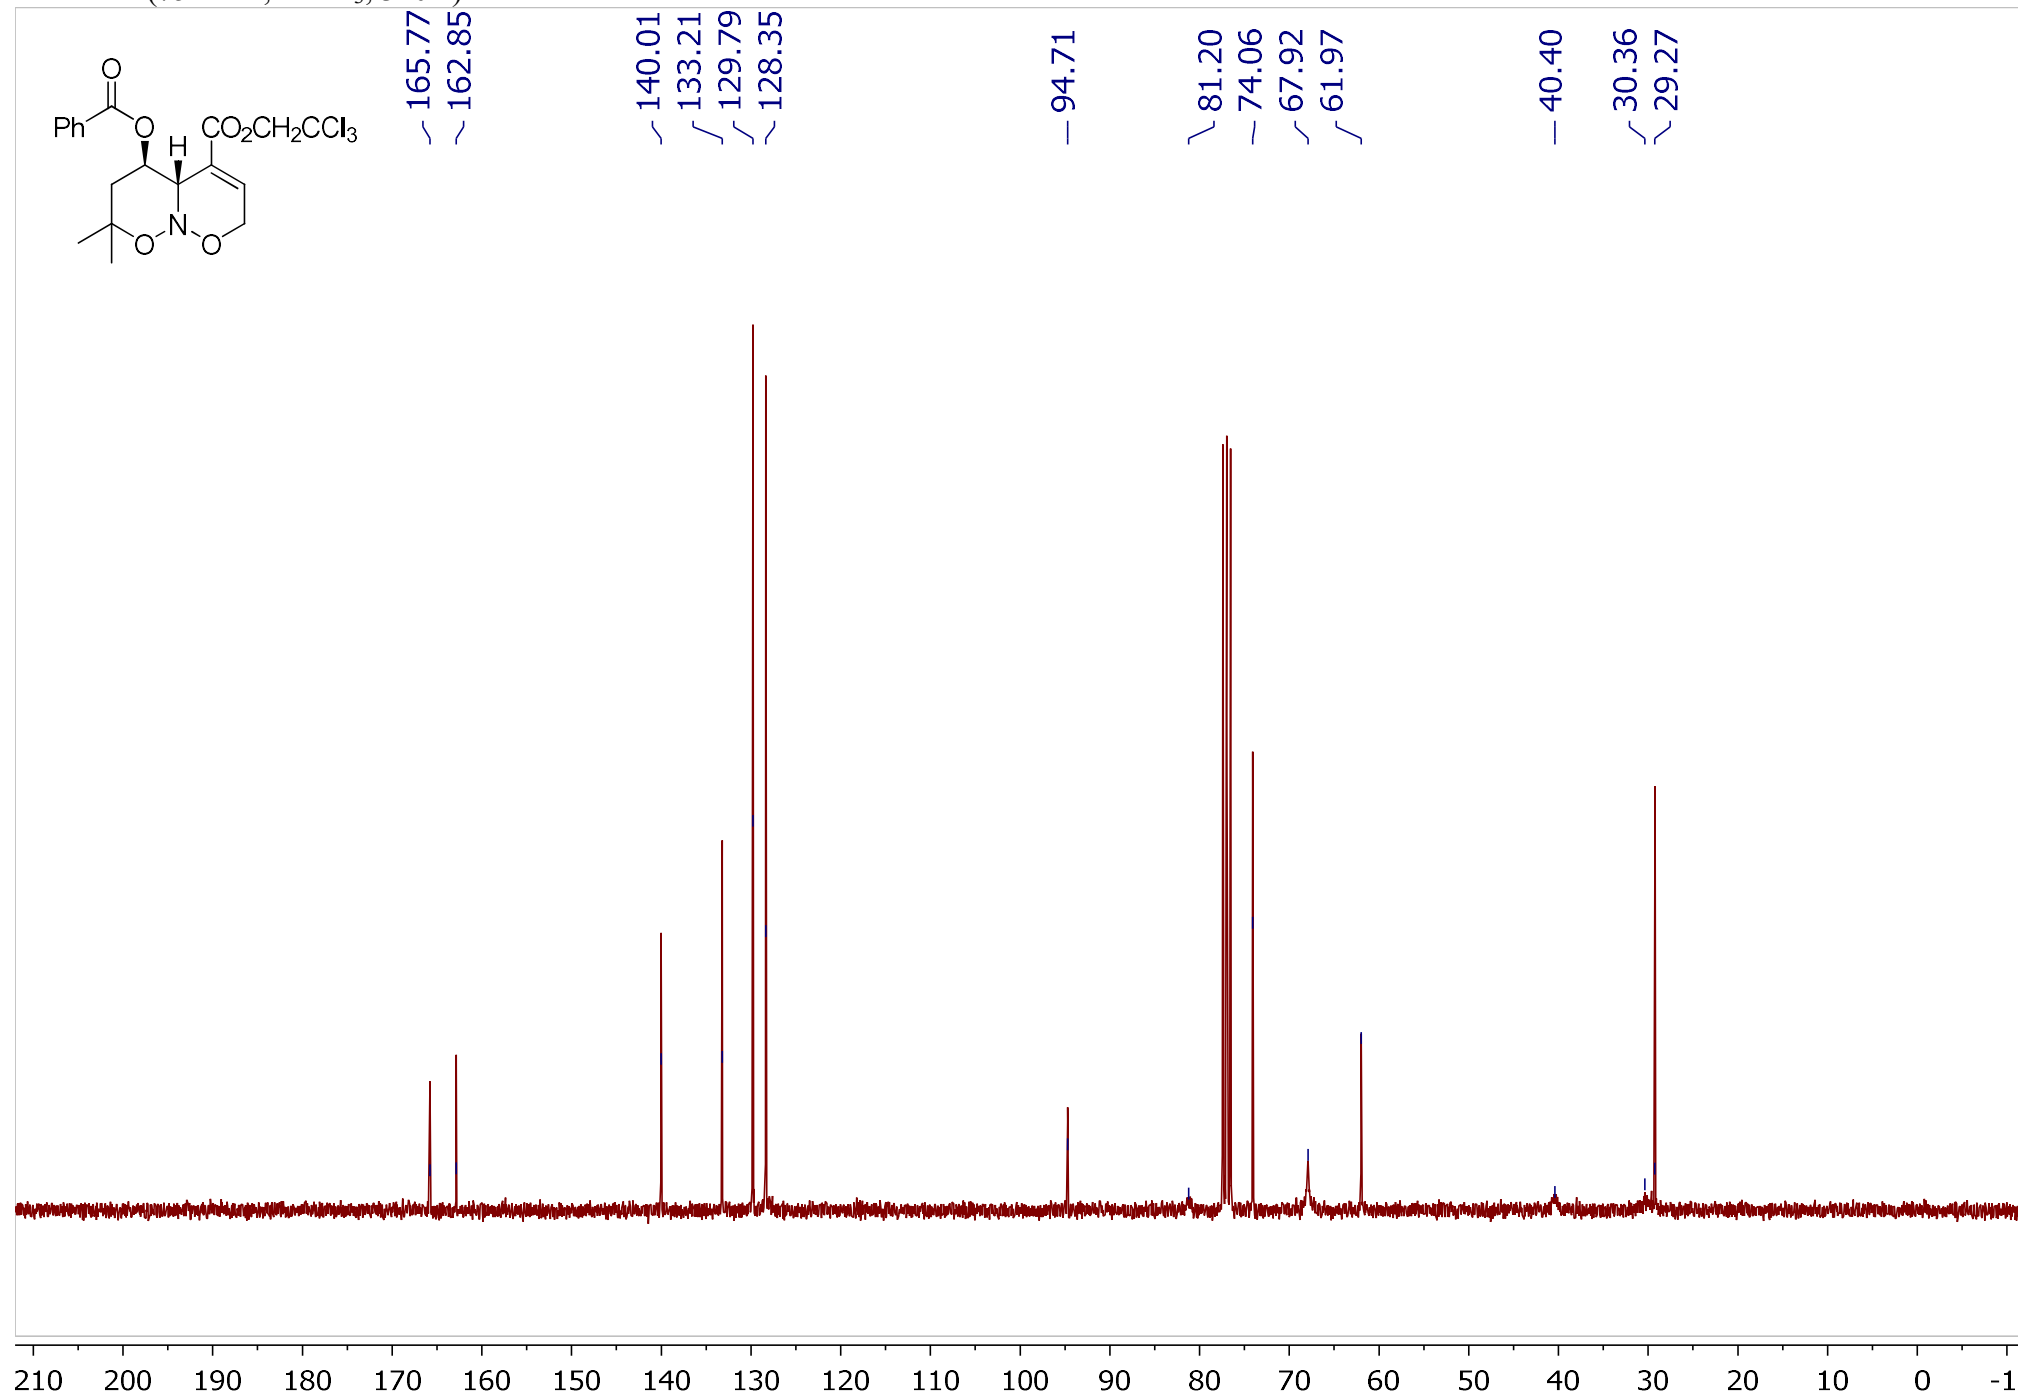

$^{13}\text{C}$  DEPT 135 (75 MHz,  $\text{CDCl}_3$ , 320K)

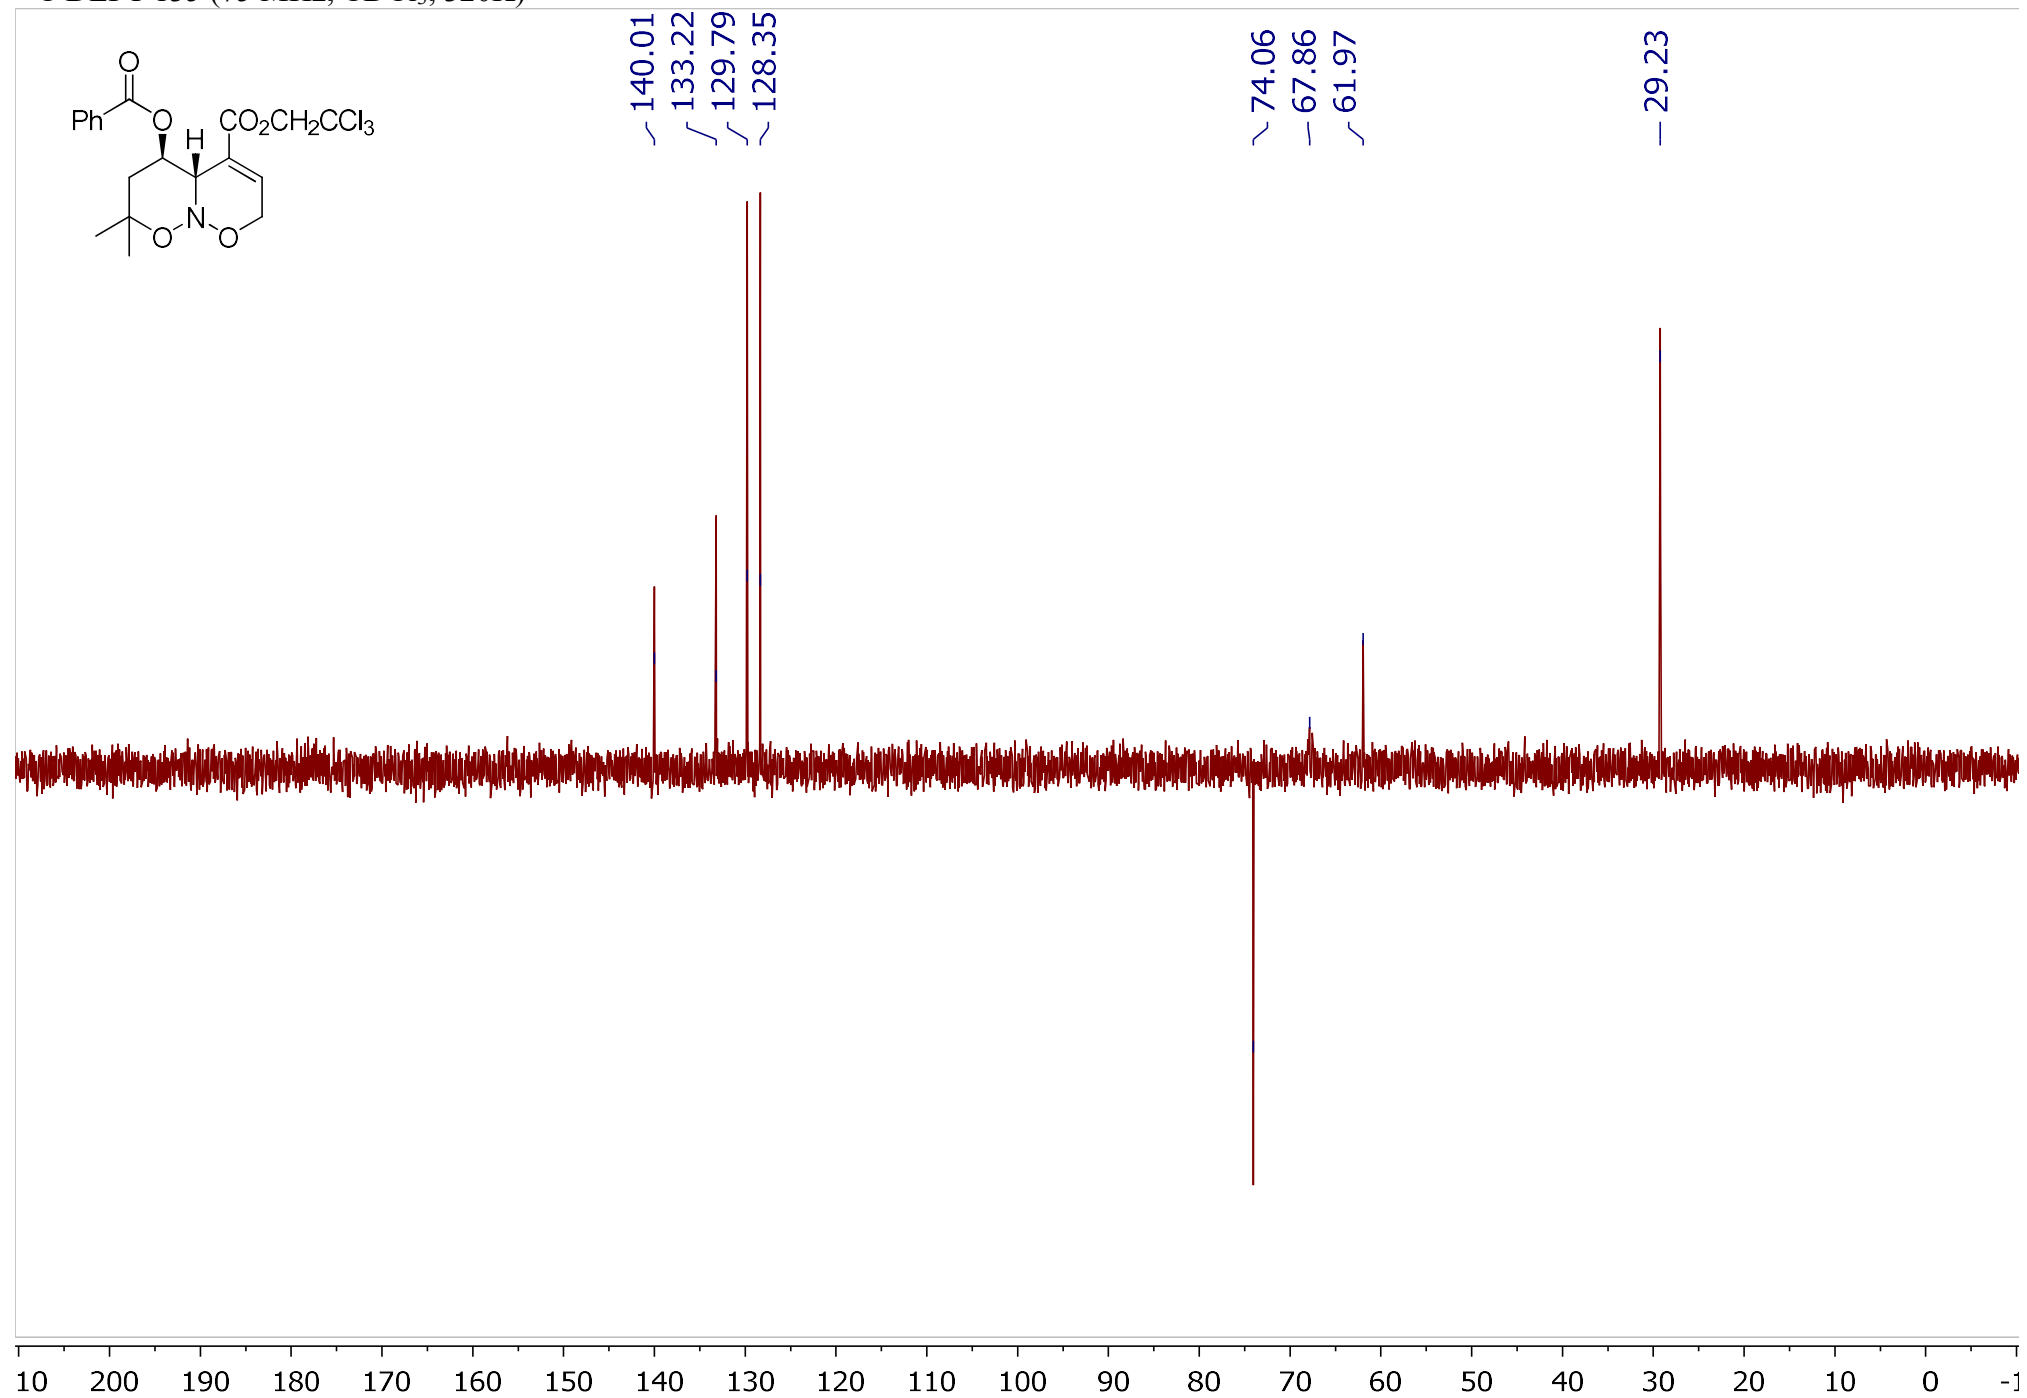

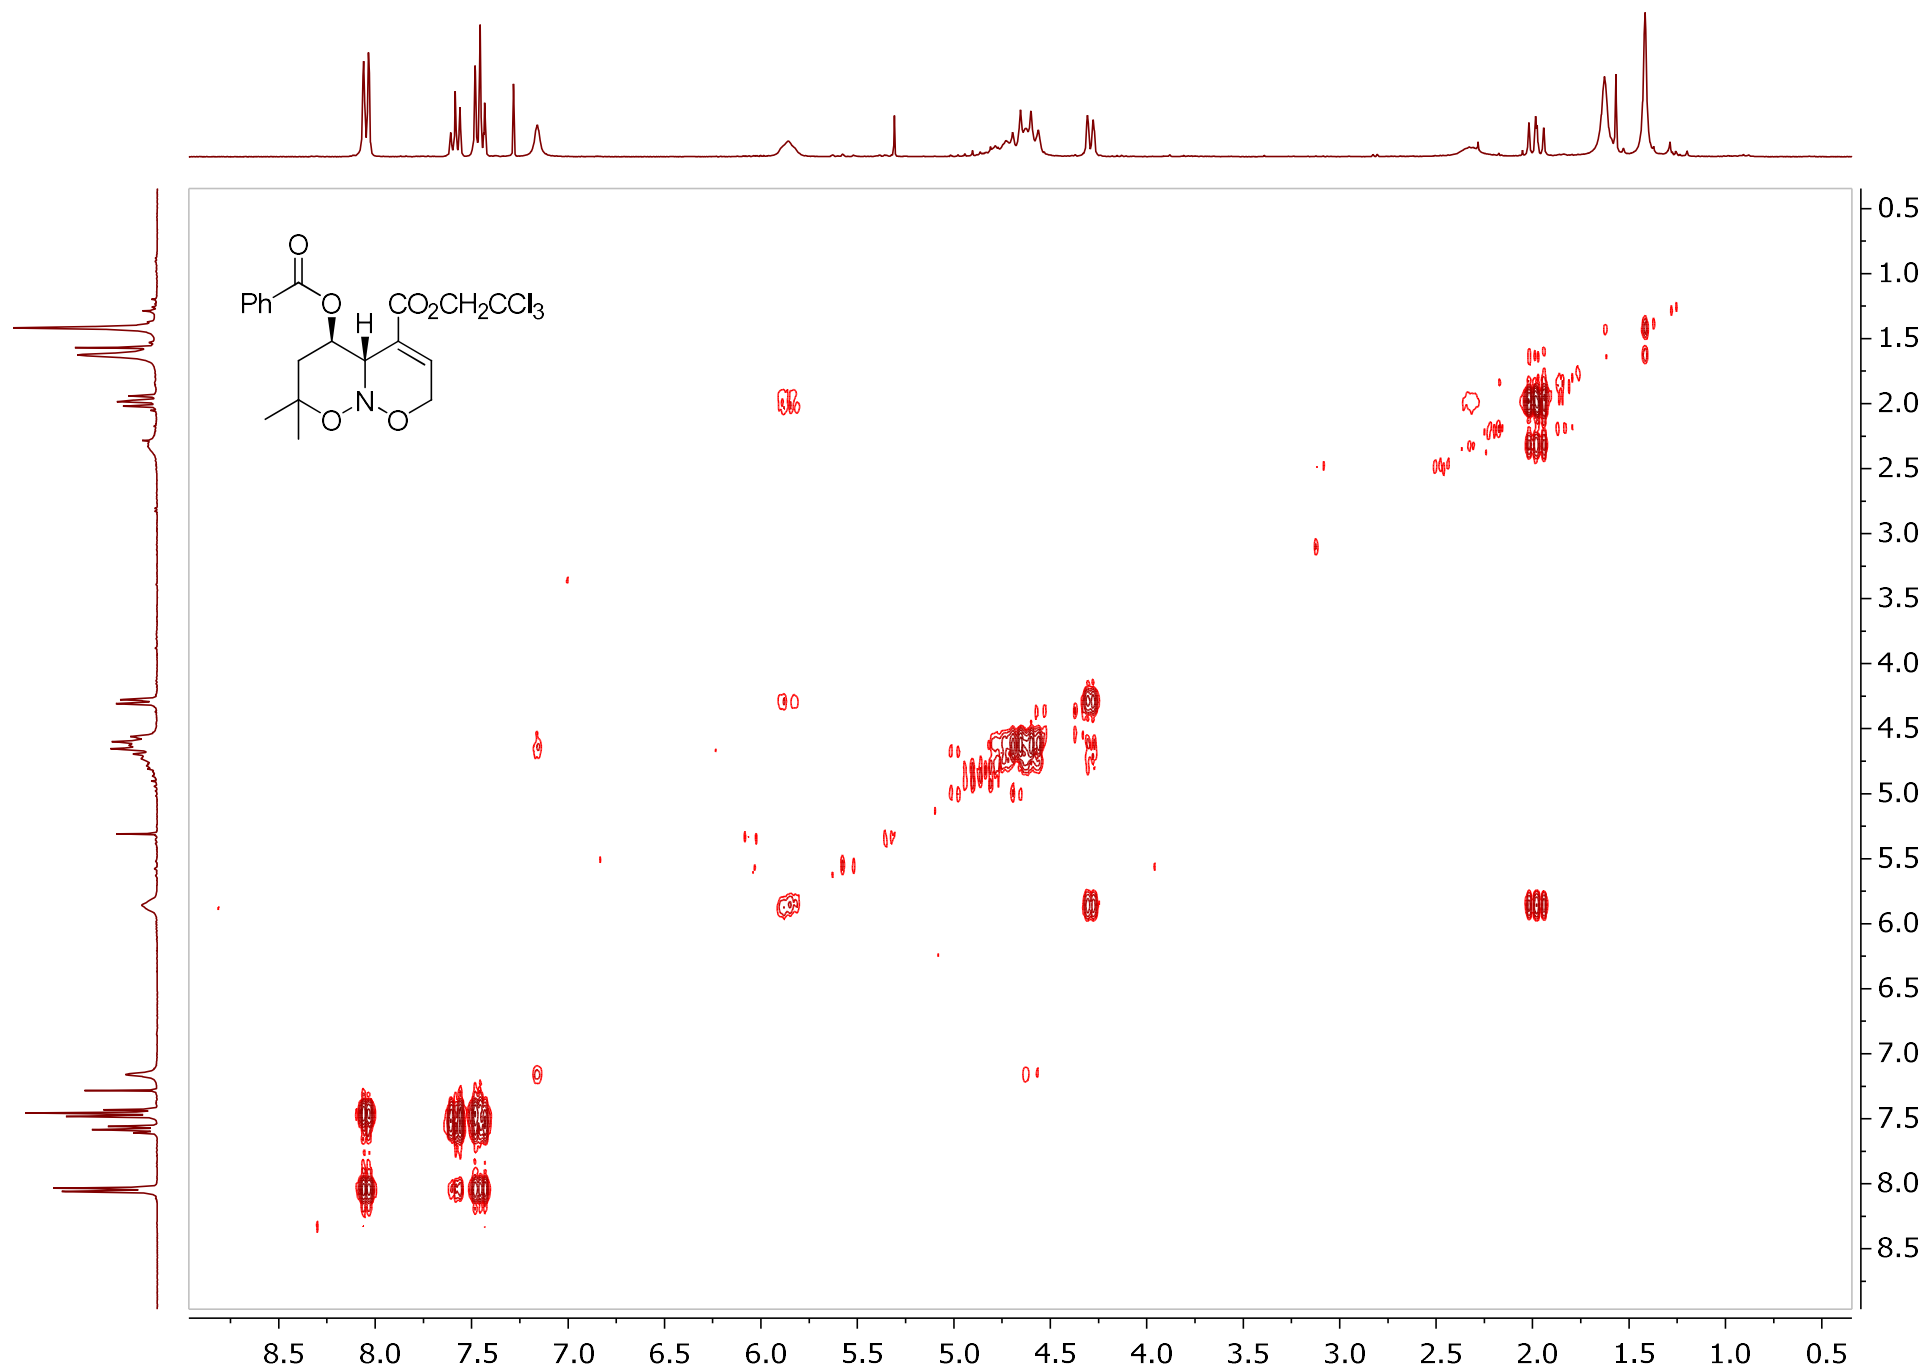

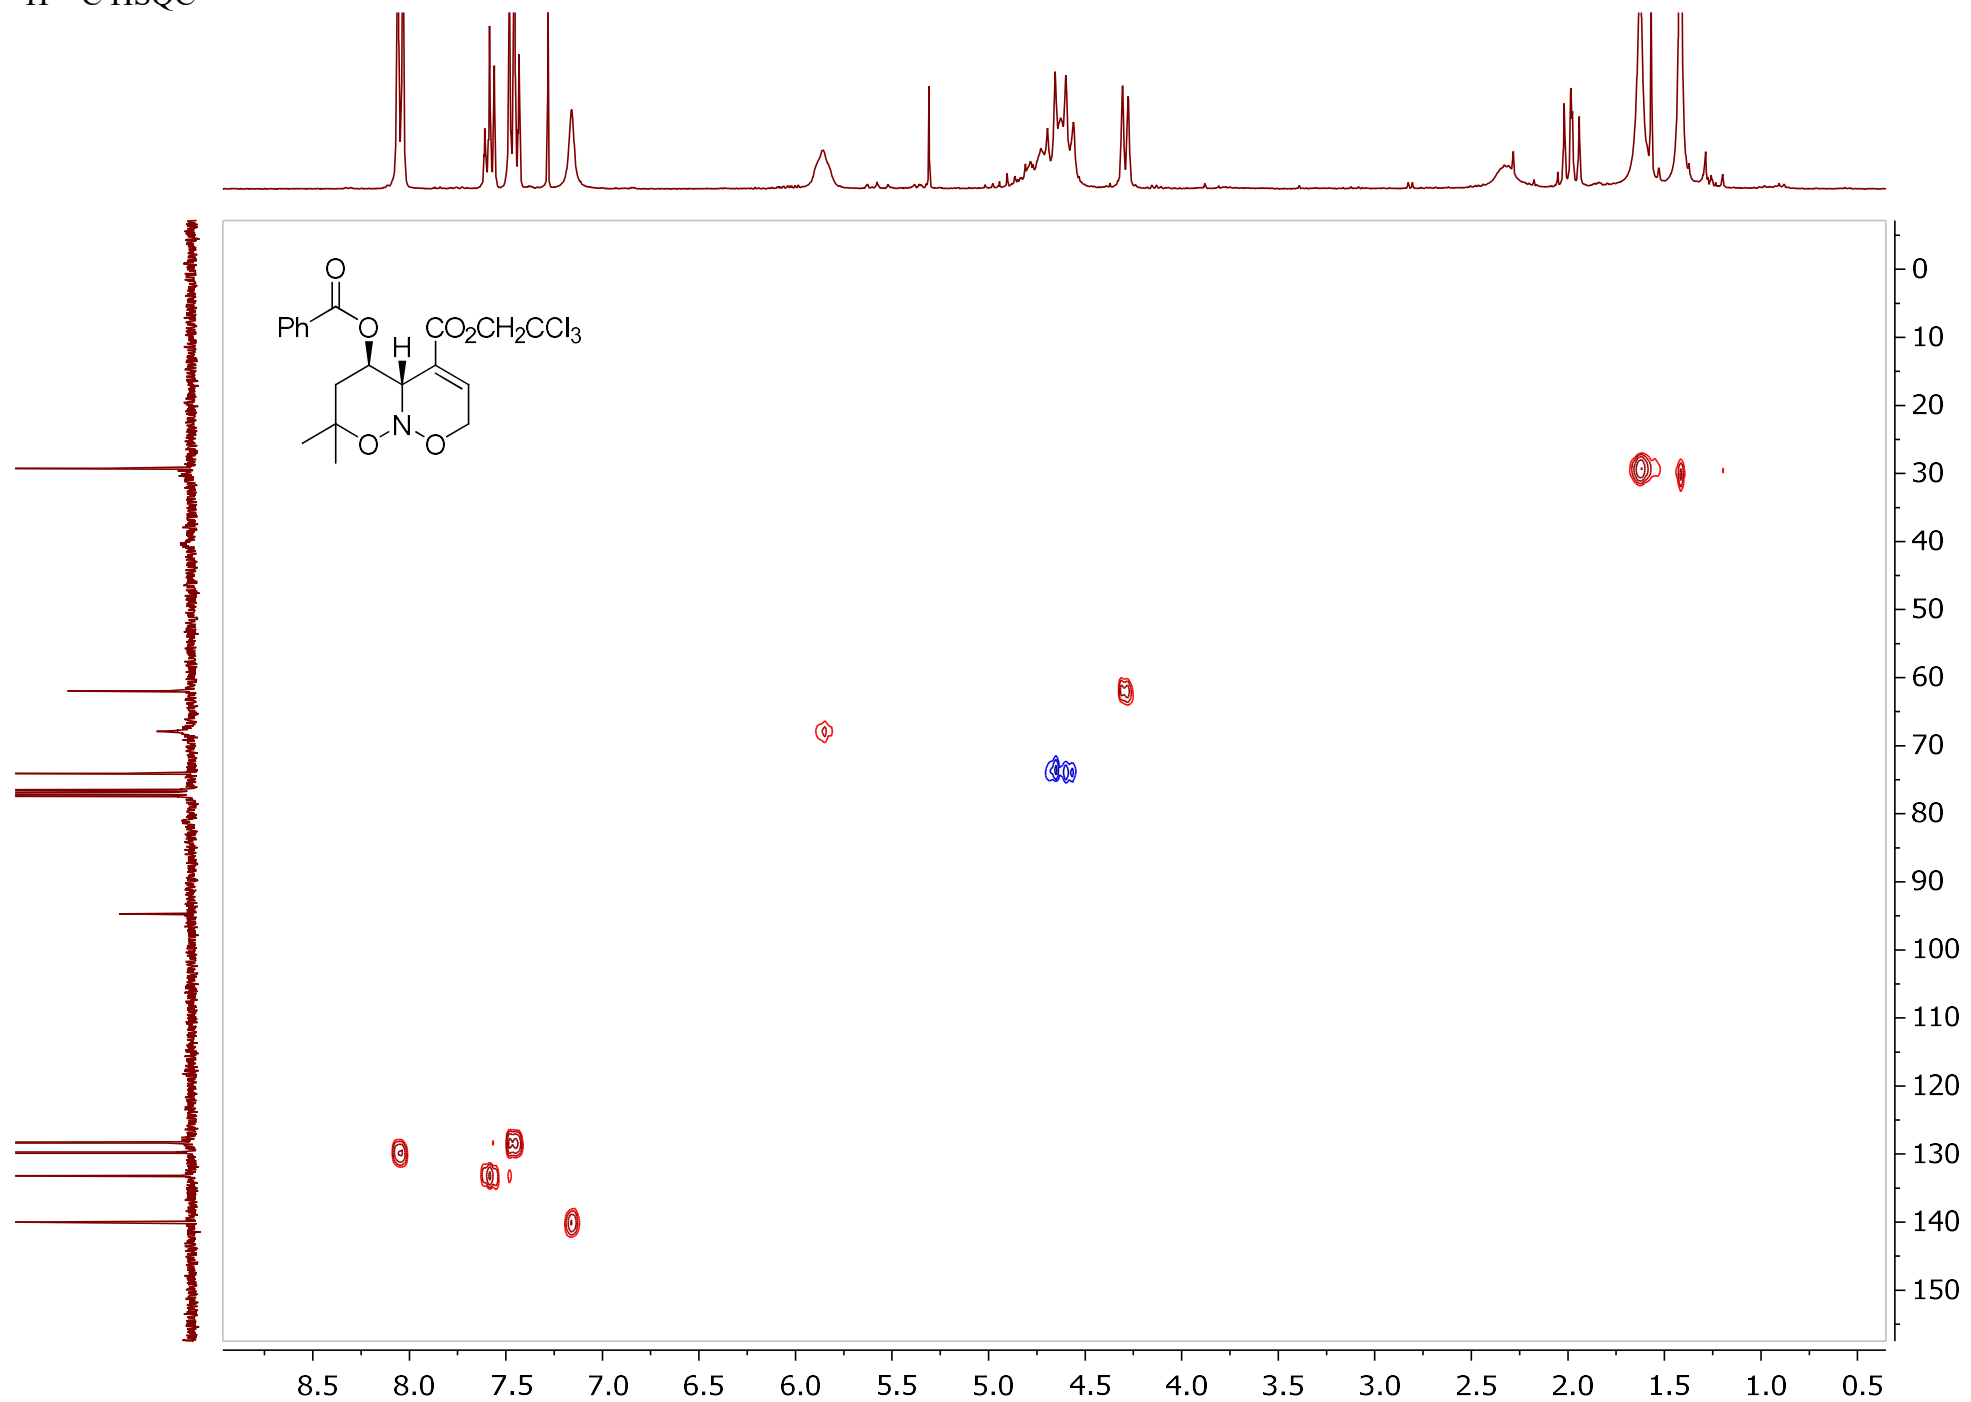

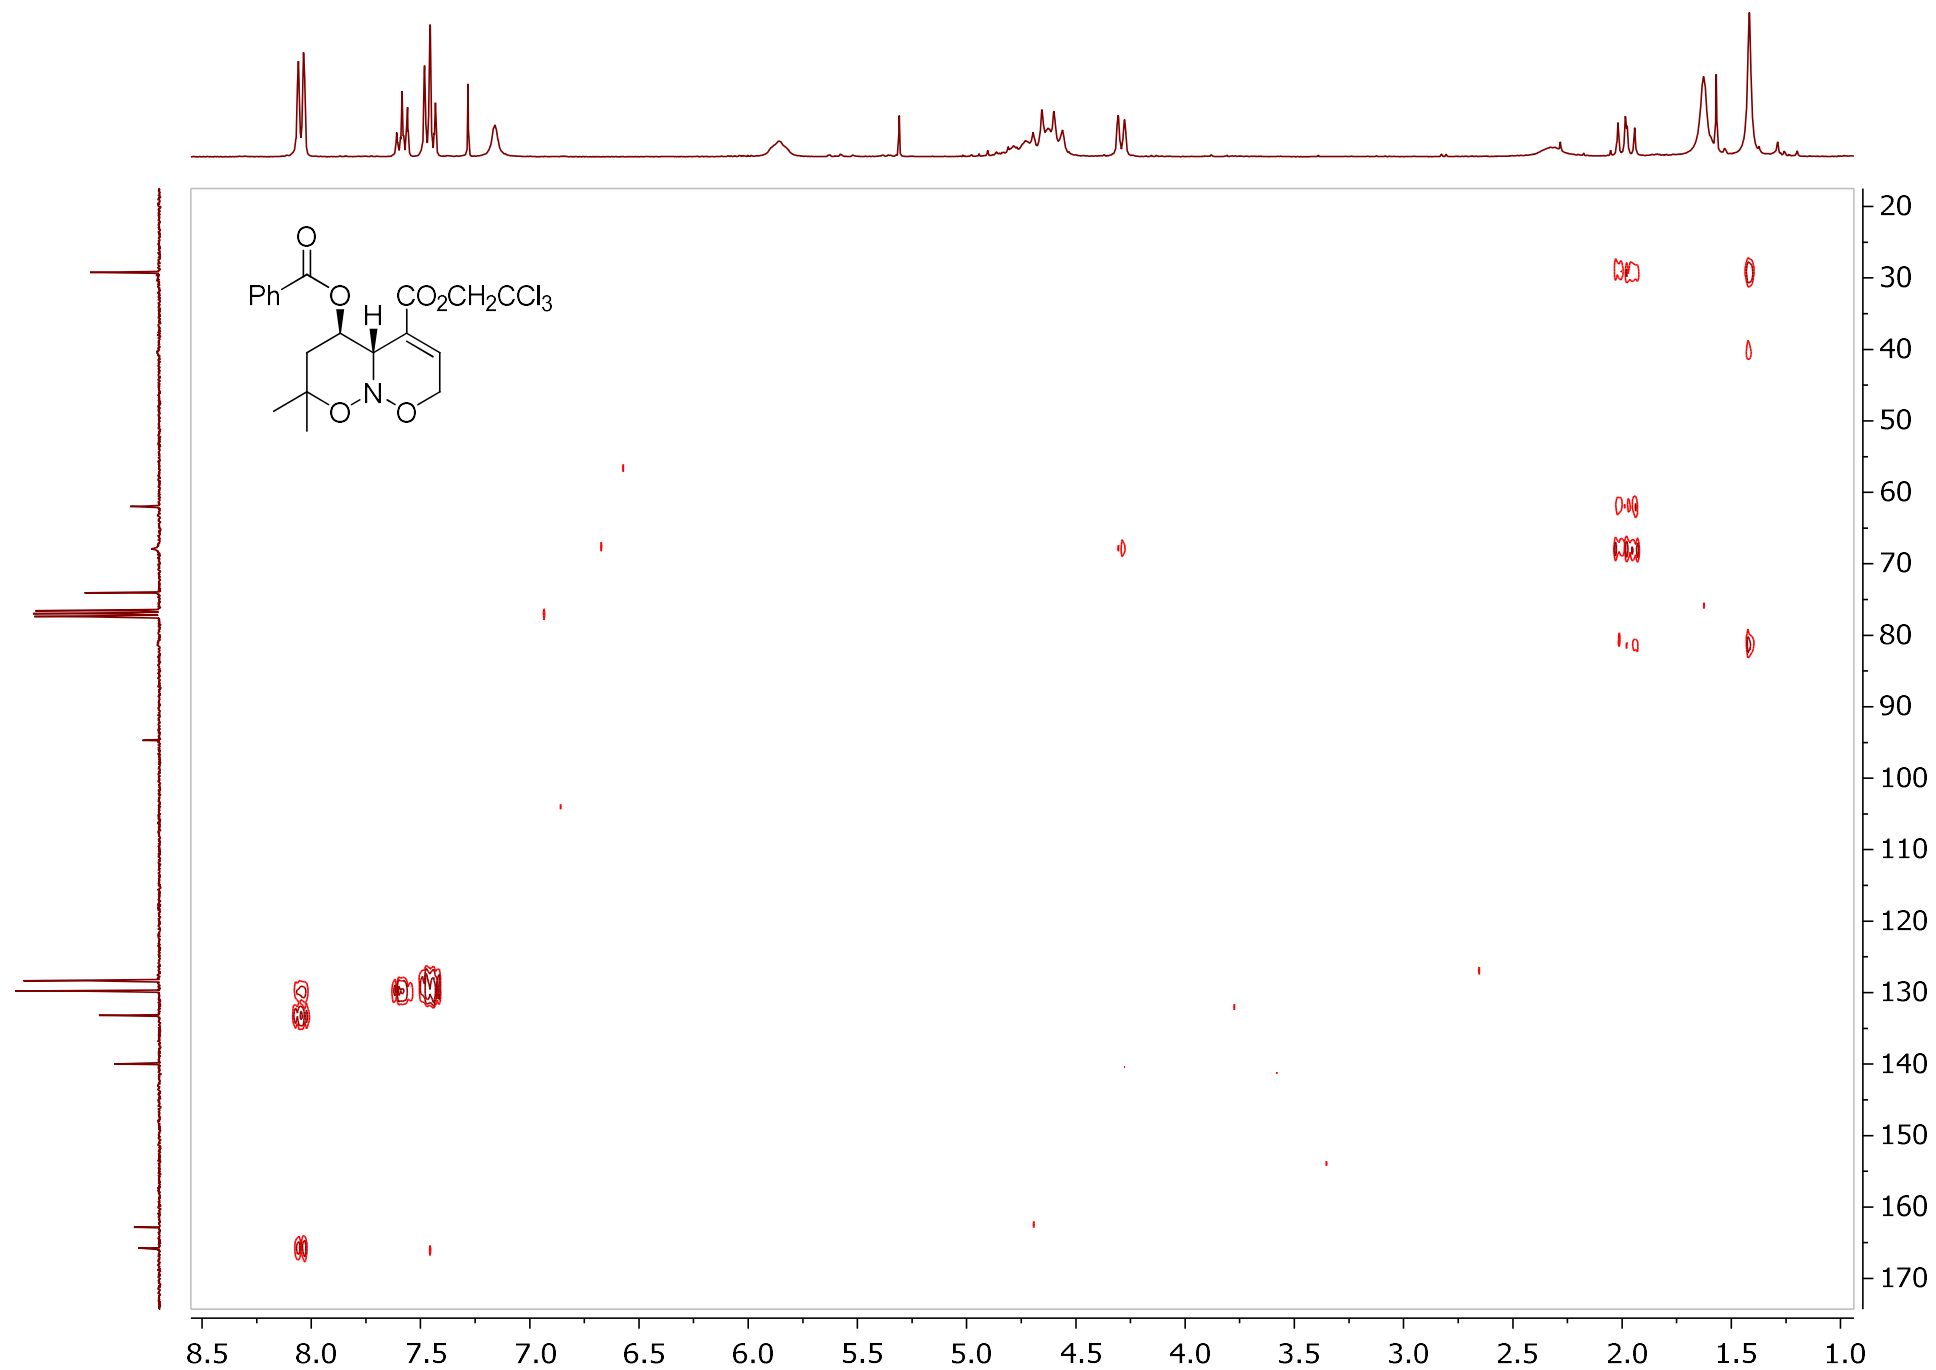

$^1\text{H}$  NMR (300 MHz, DMSO- $\text{d}_6$ , 320K)

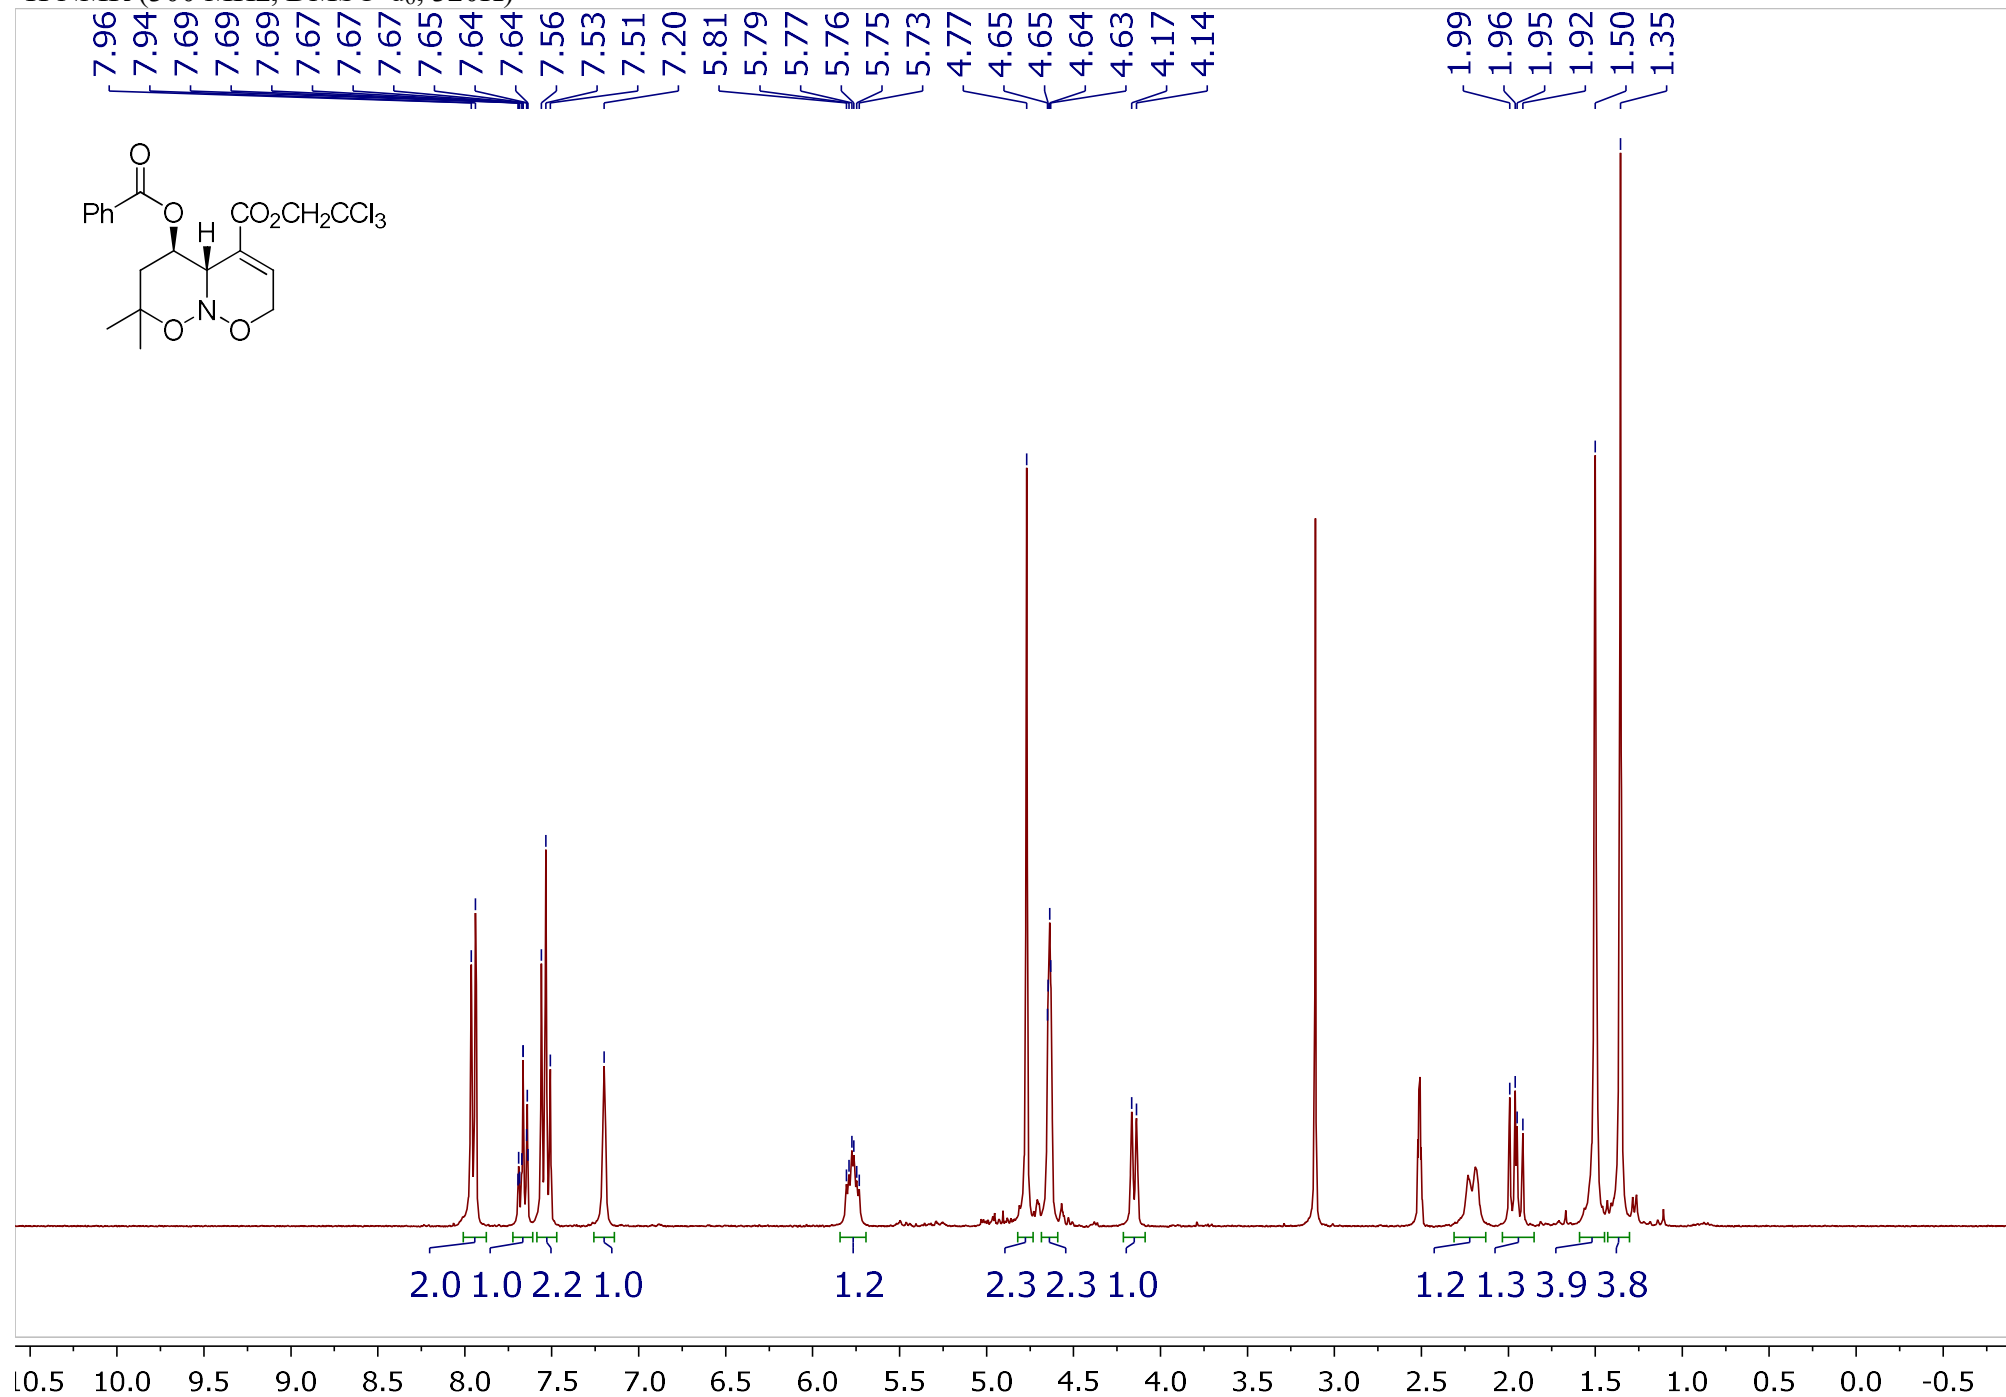

$^{13}\text{C}$  NMR (75 MHz, DMSO- $d_6$ , 320K)

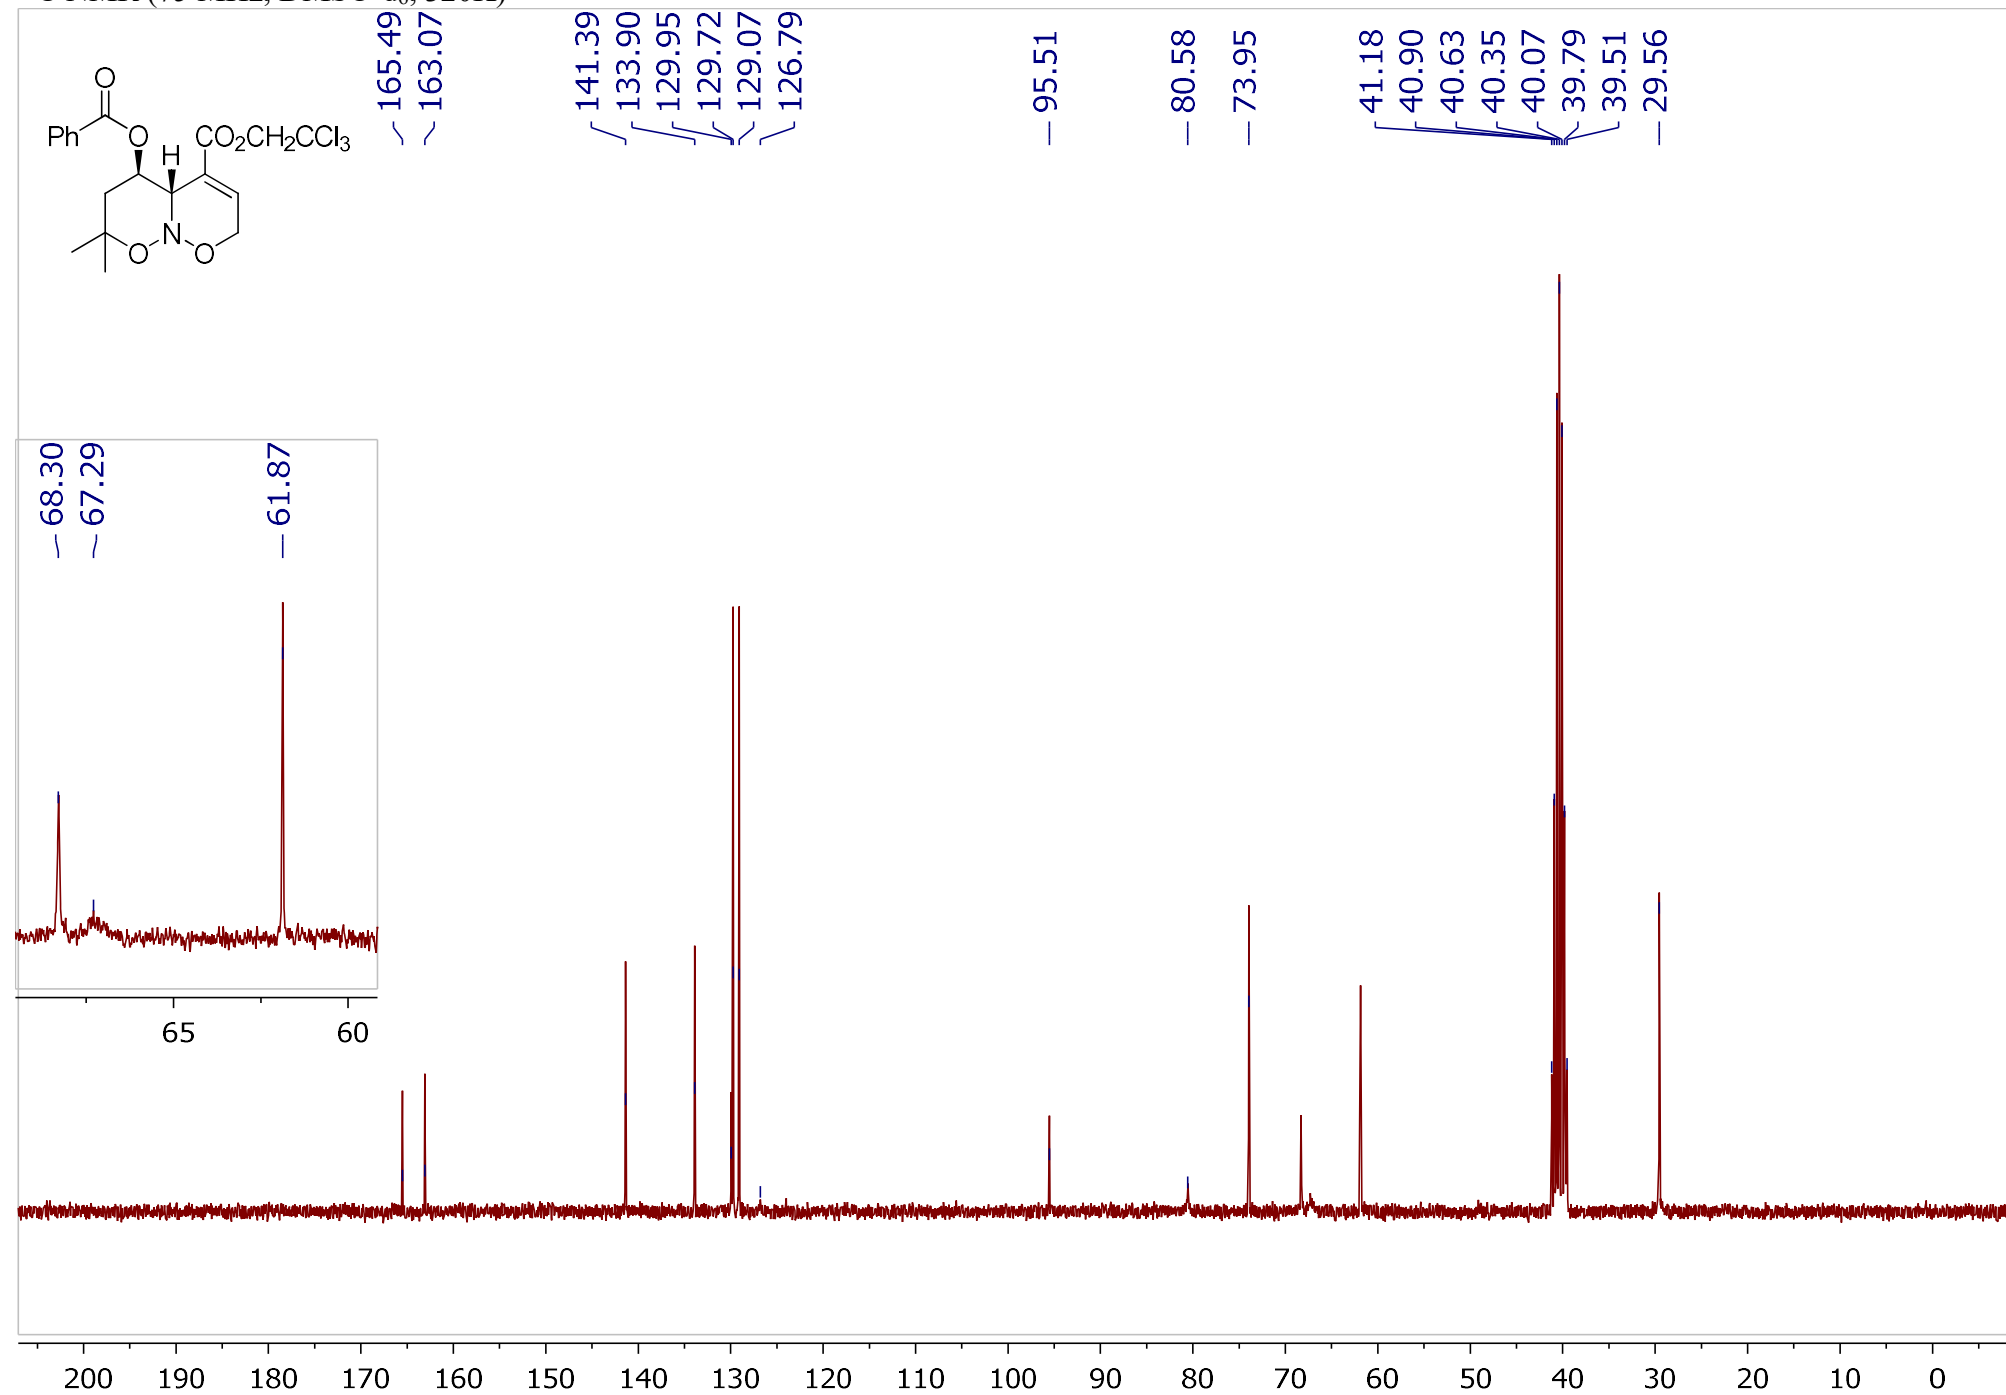



<sup>13</sup>C DEPT 135 (75 MHz, DMSO-d<sub>6</sub>, 320K)

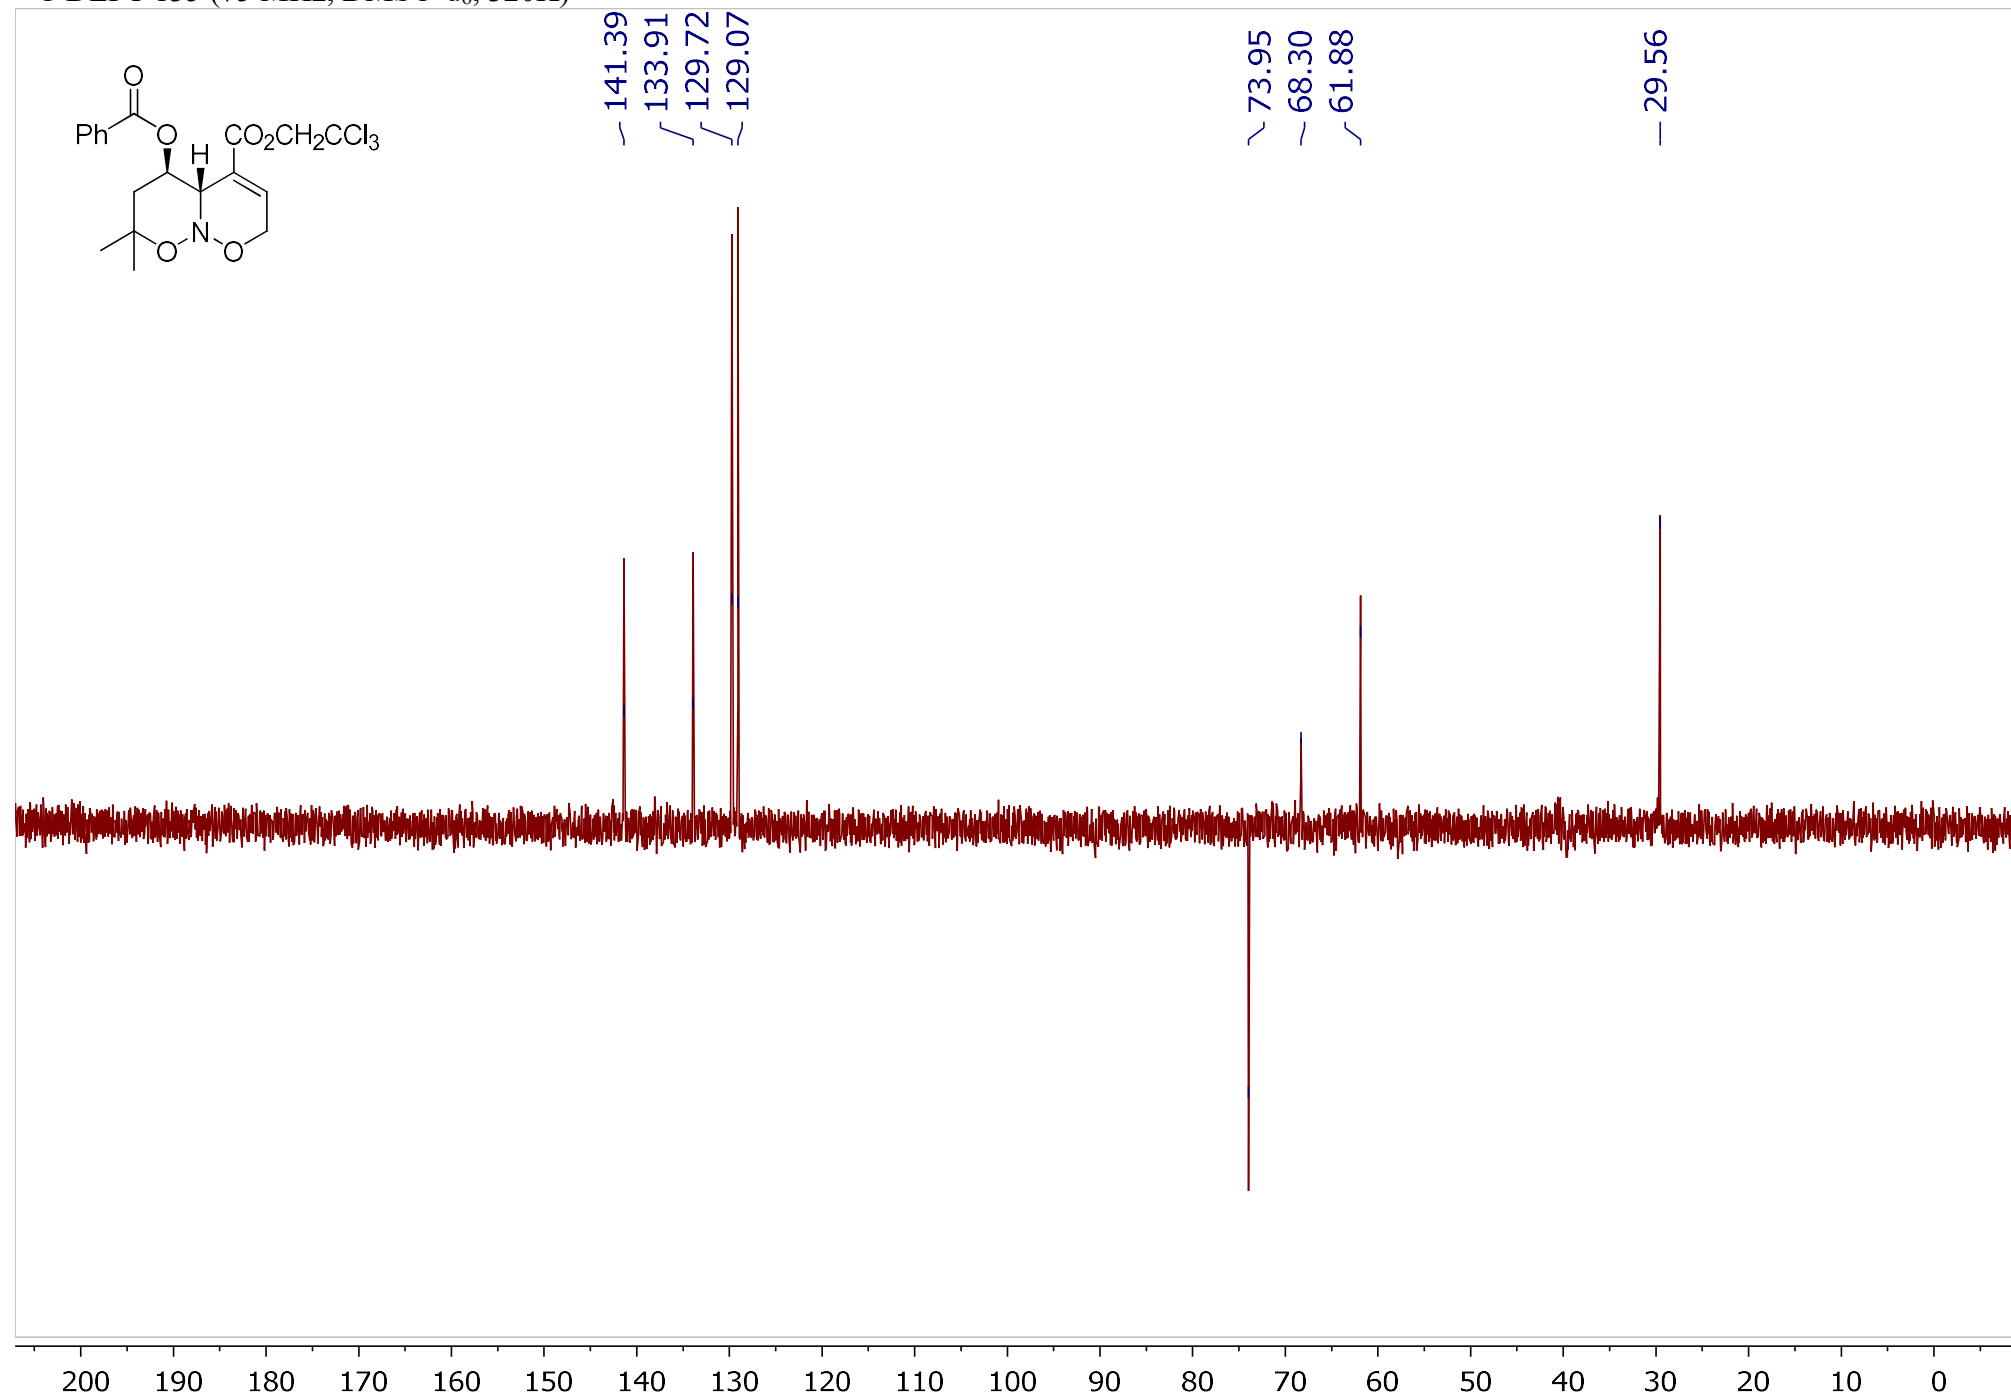

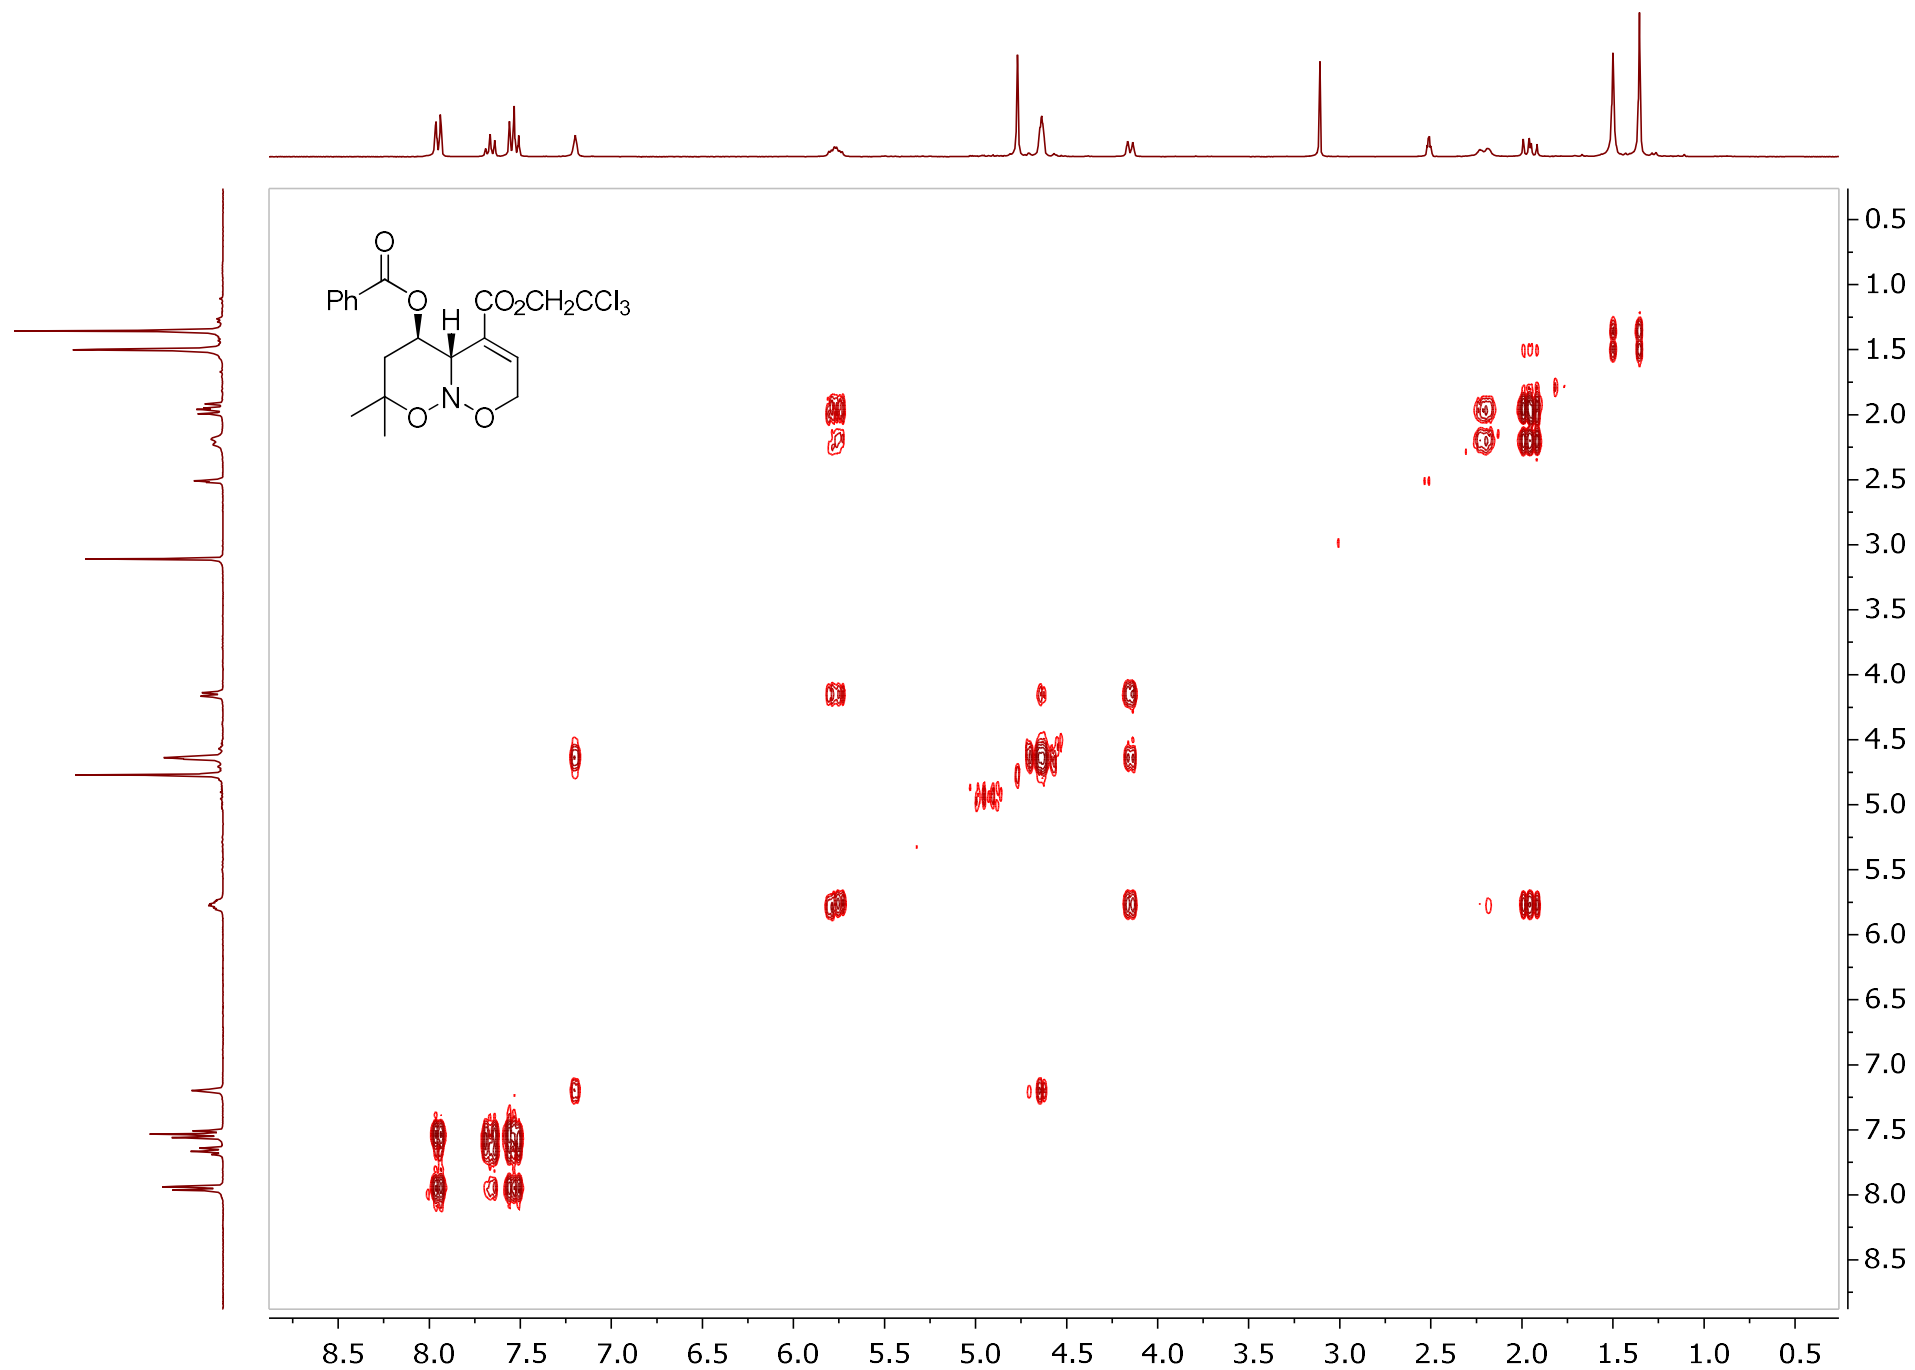

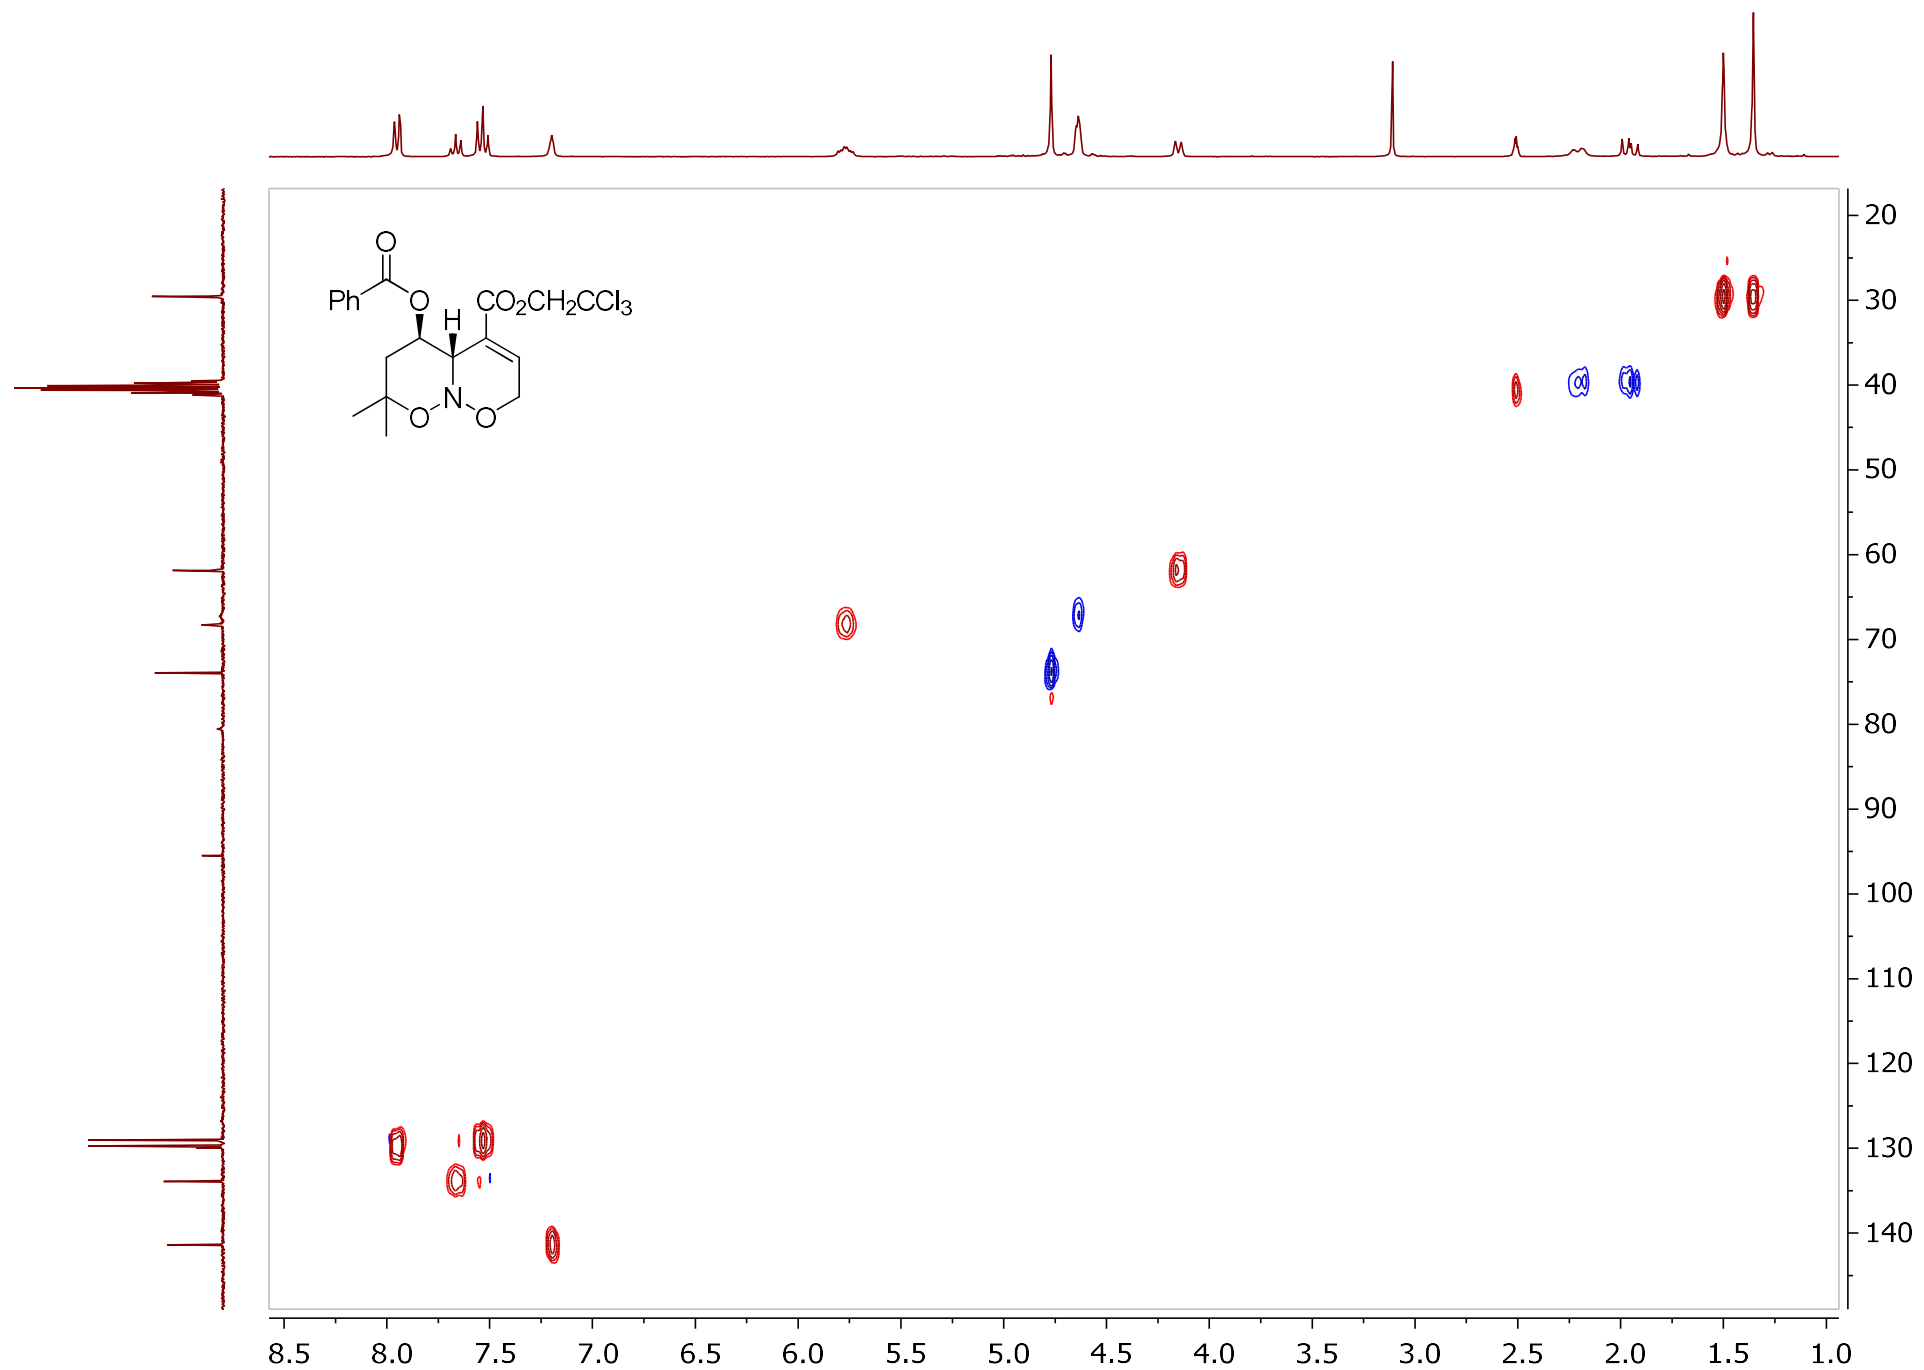

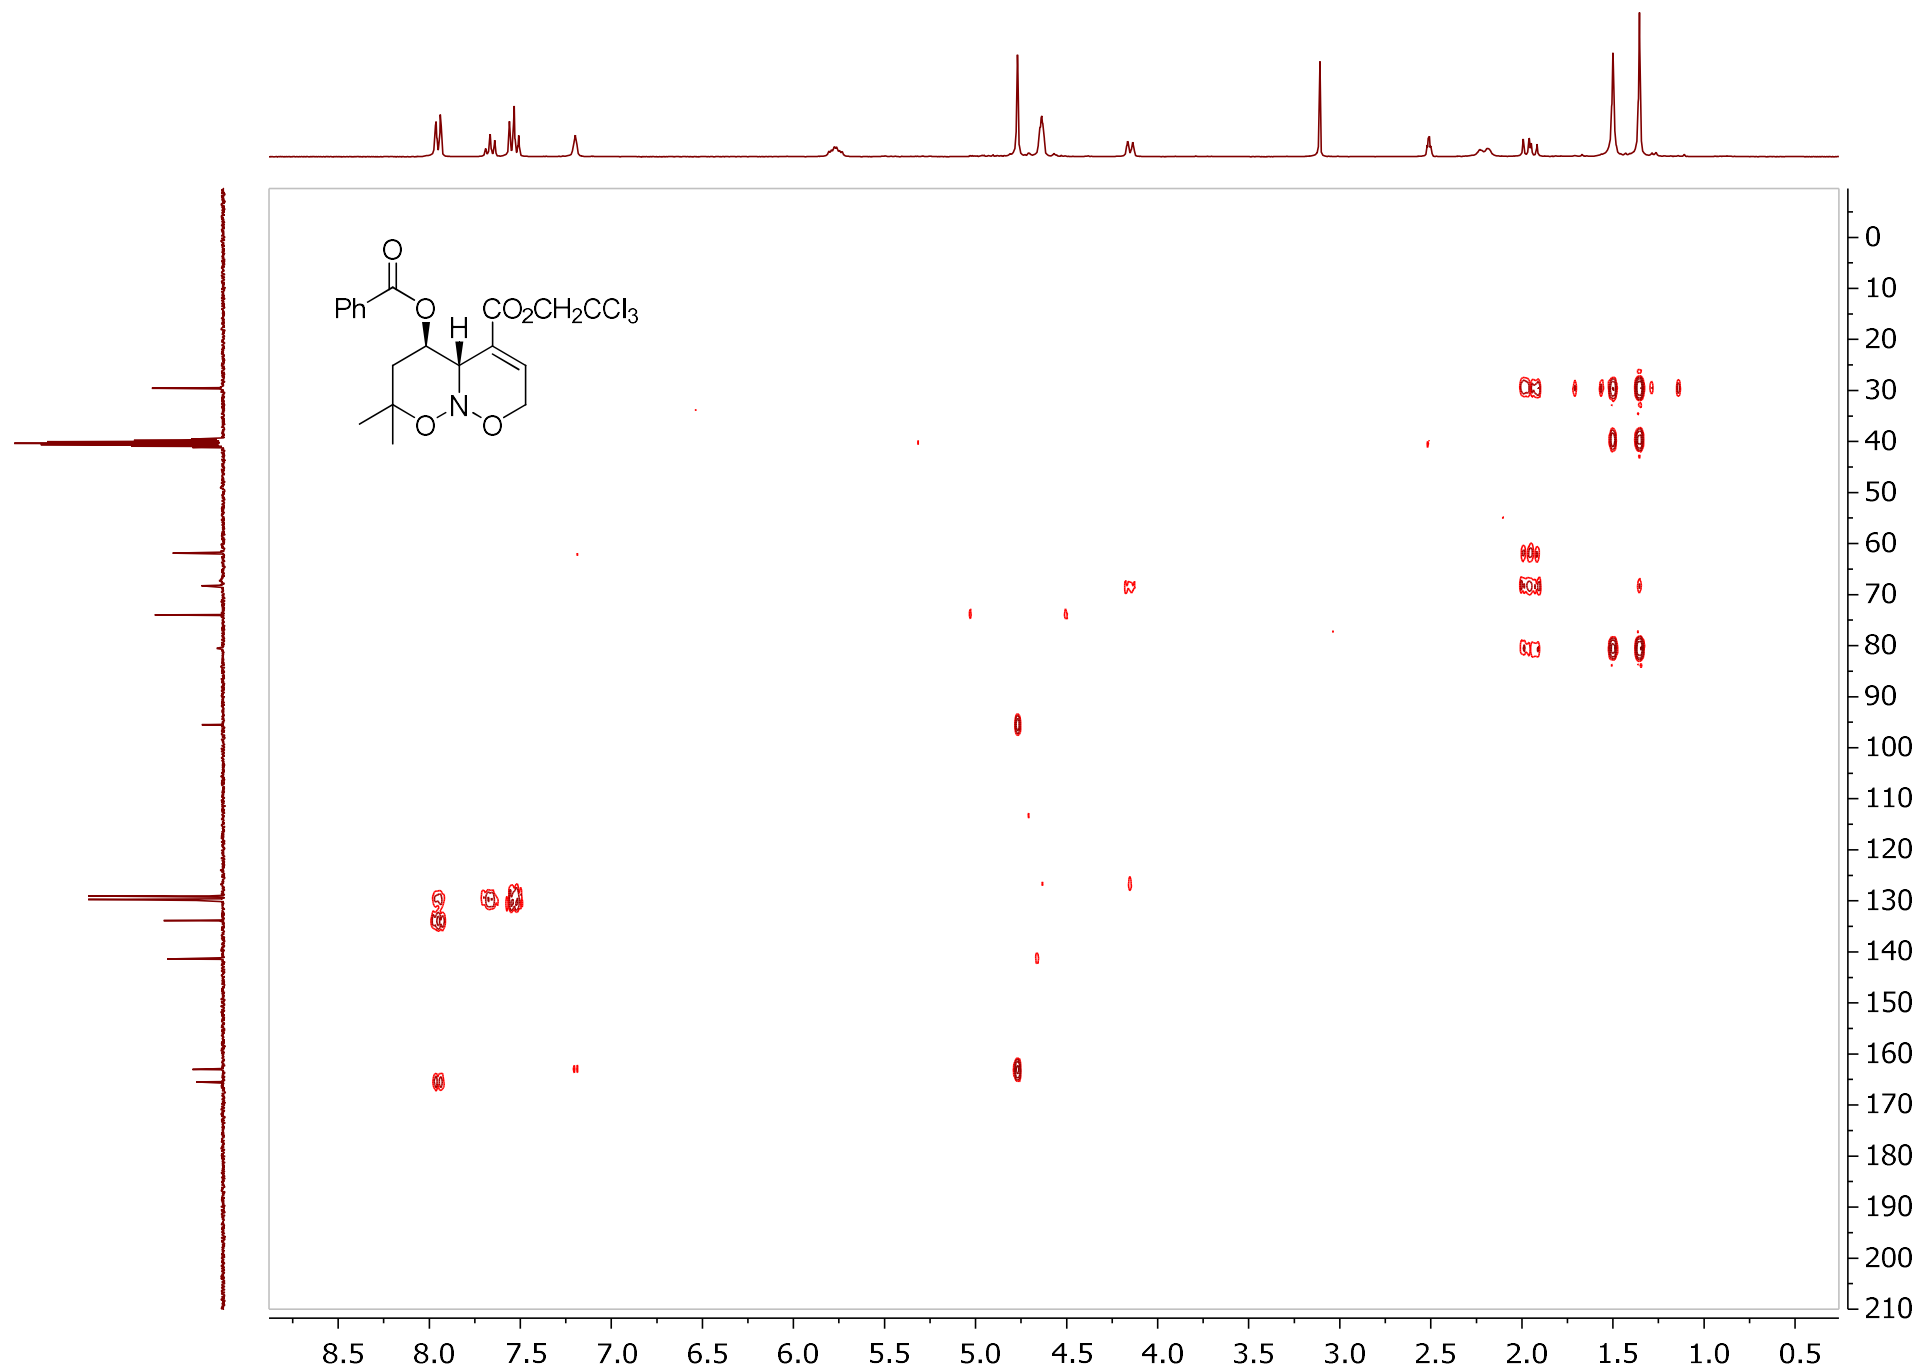

$^1\text{H}$ - $^1\text{H}$  NOESY

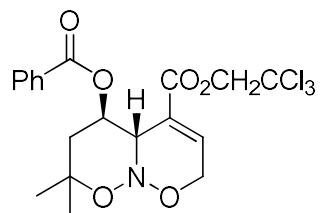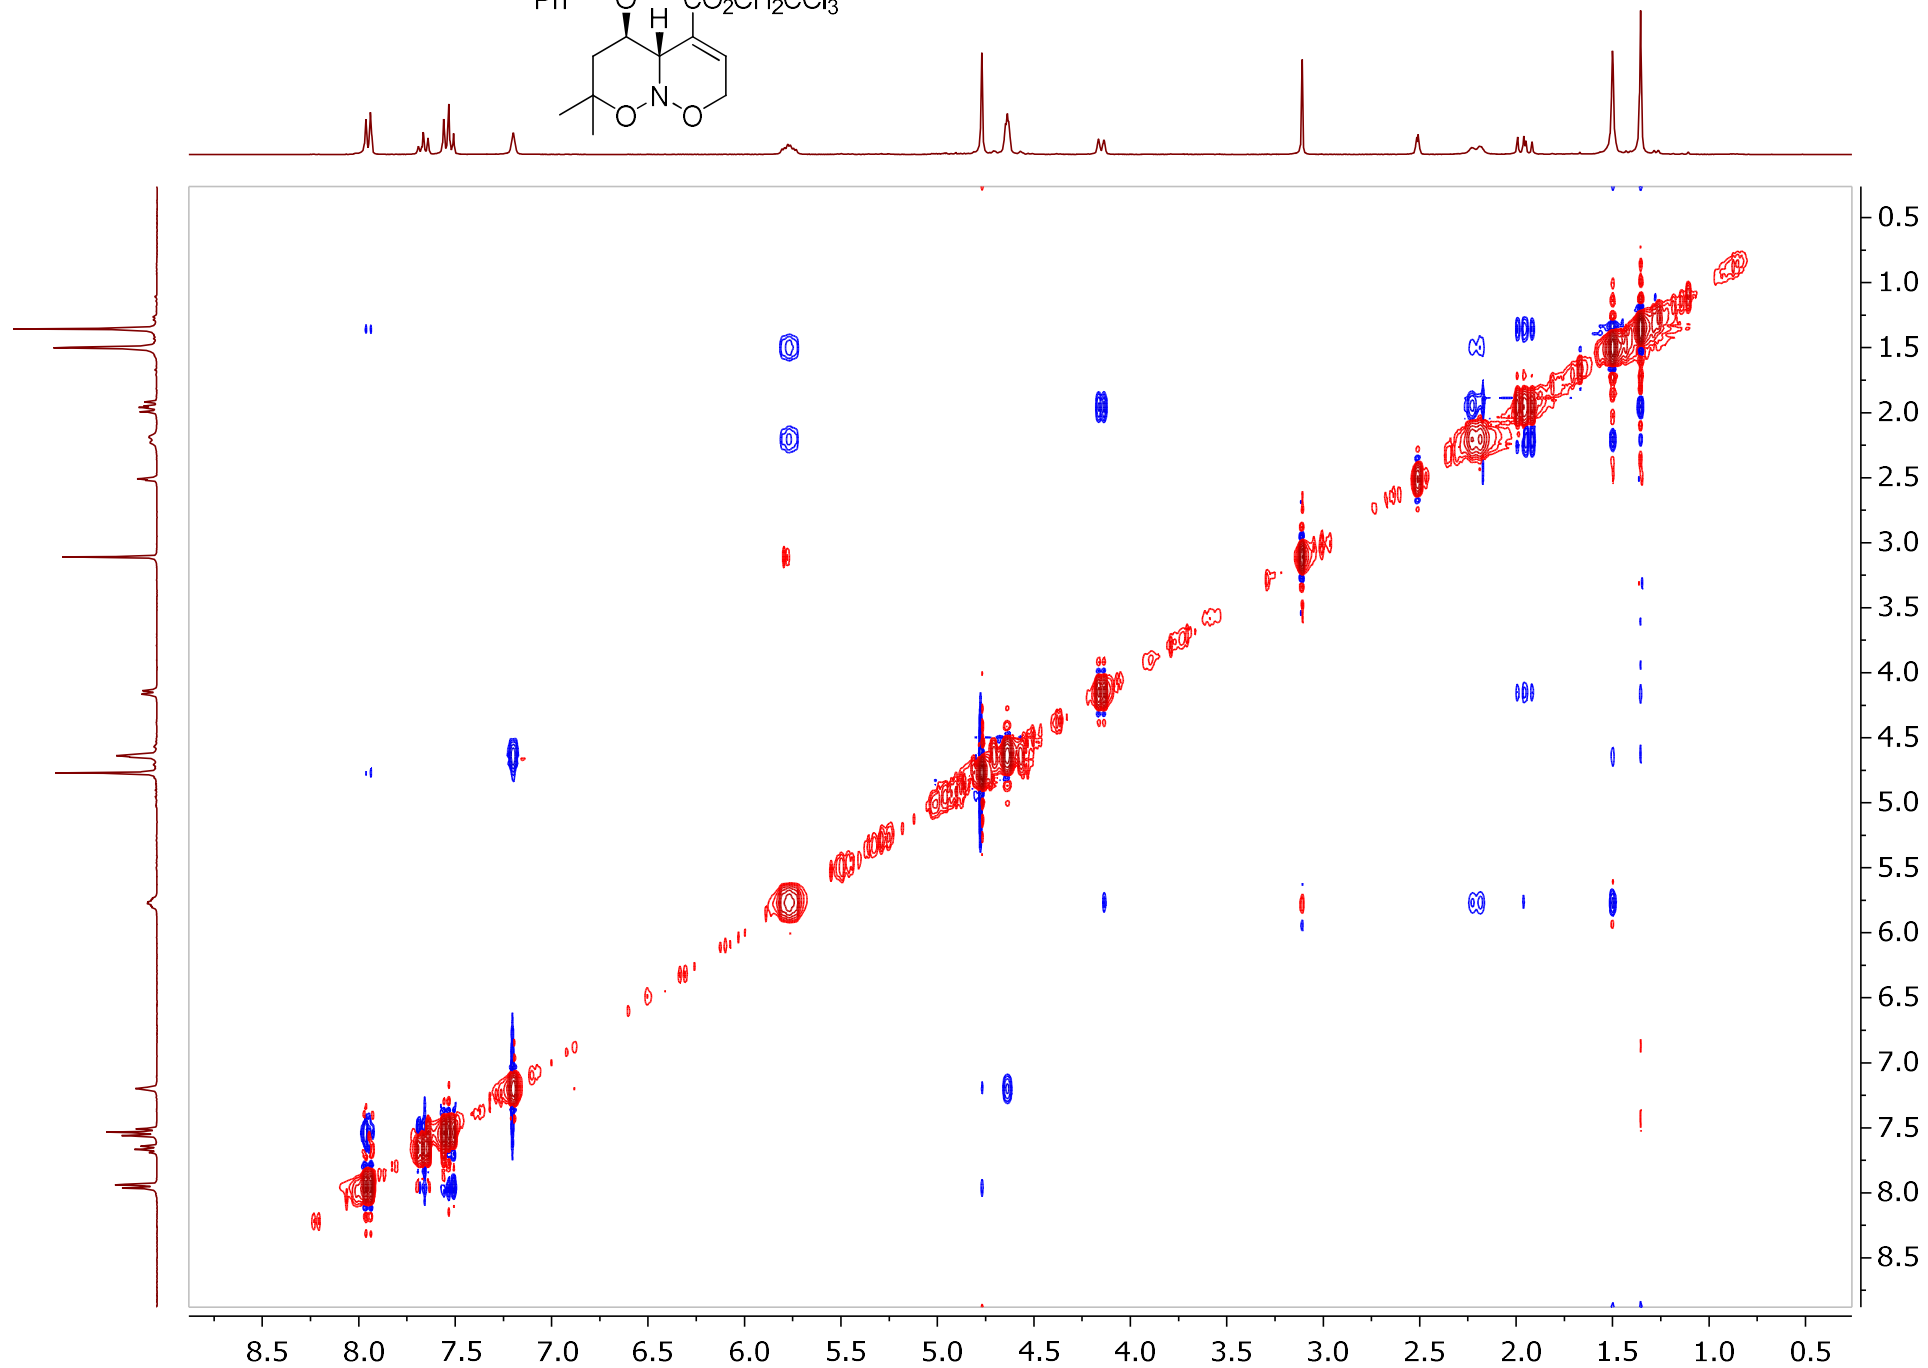

**2,2,2-Trichloroethyl (4aR\*,5R\*)-7,7-dimethyl-5-phenethyl-4a,5,6,7-tetrahydro-2H-[1,2]oxazino[2,3-b][1,2]oxazine-4-carboxylate 3m**

$^1\text{H}$  NMR (300 MHz,  $\text{CDCl}_3$ )

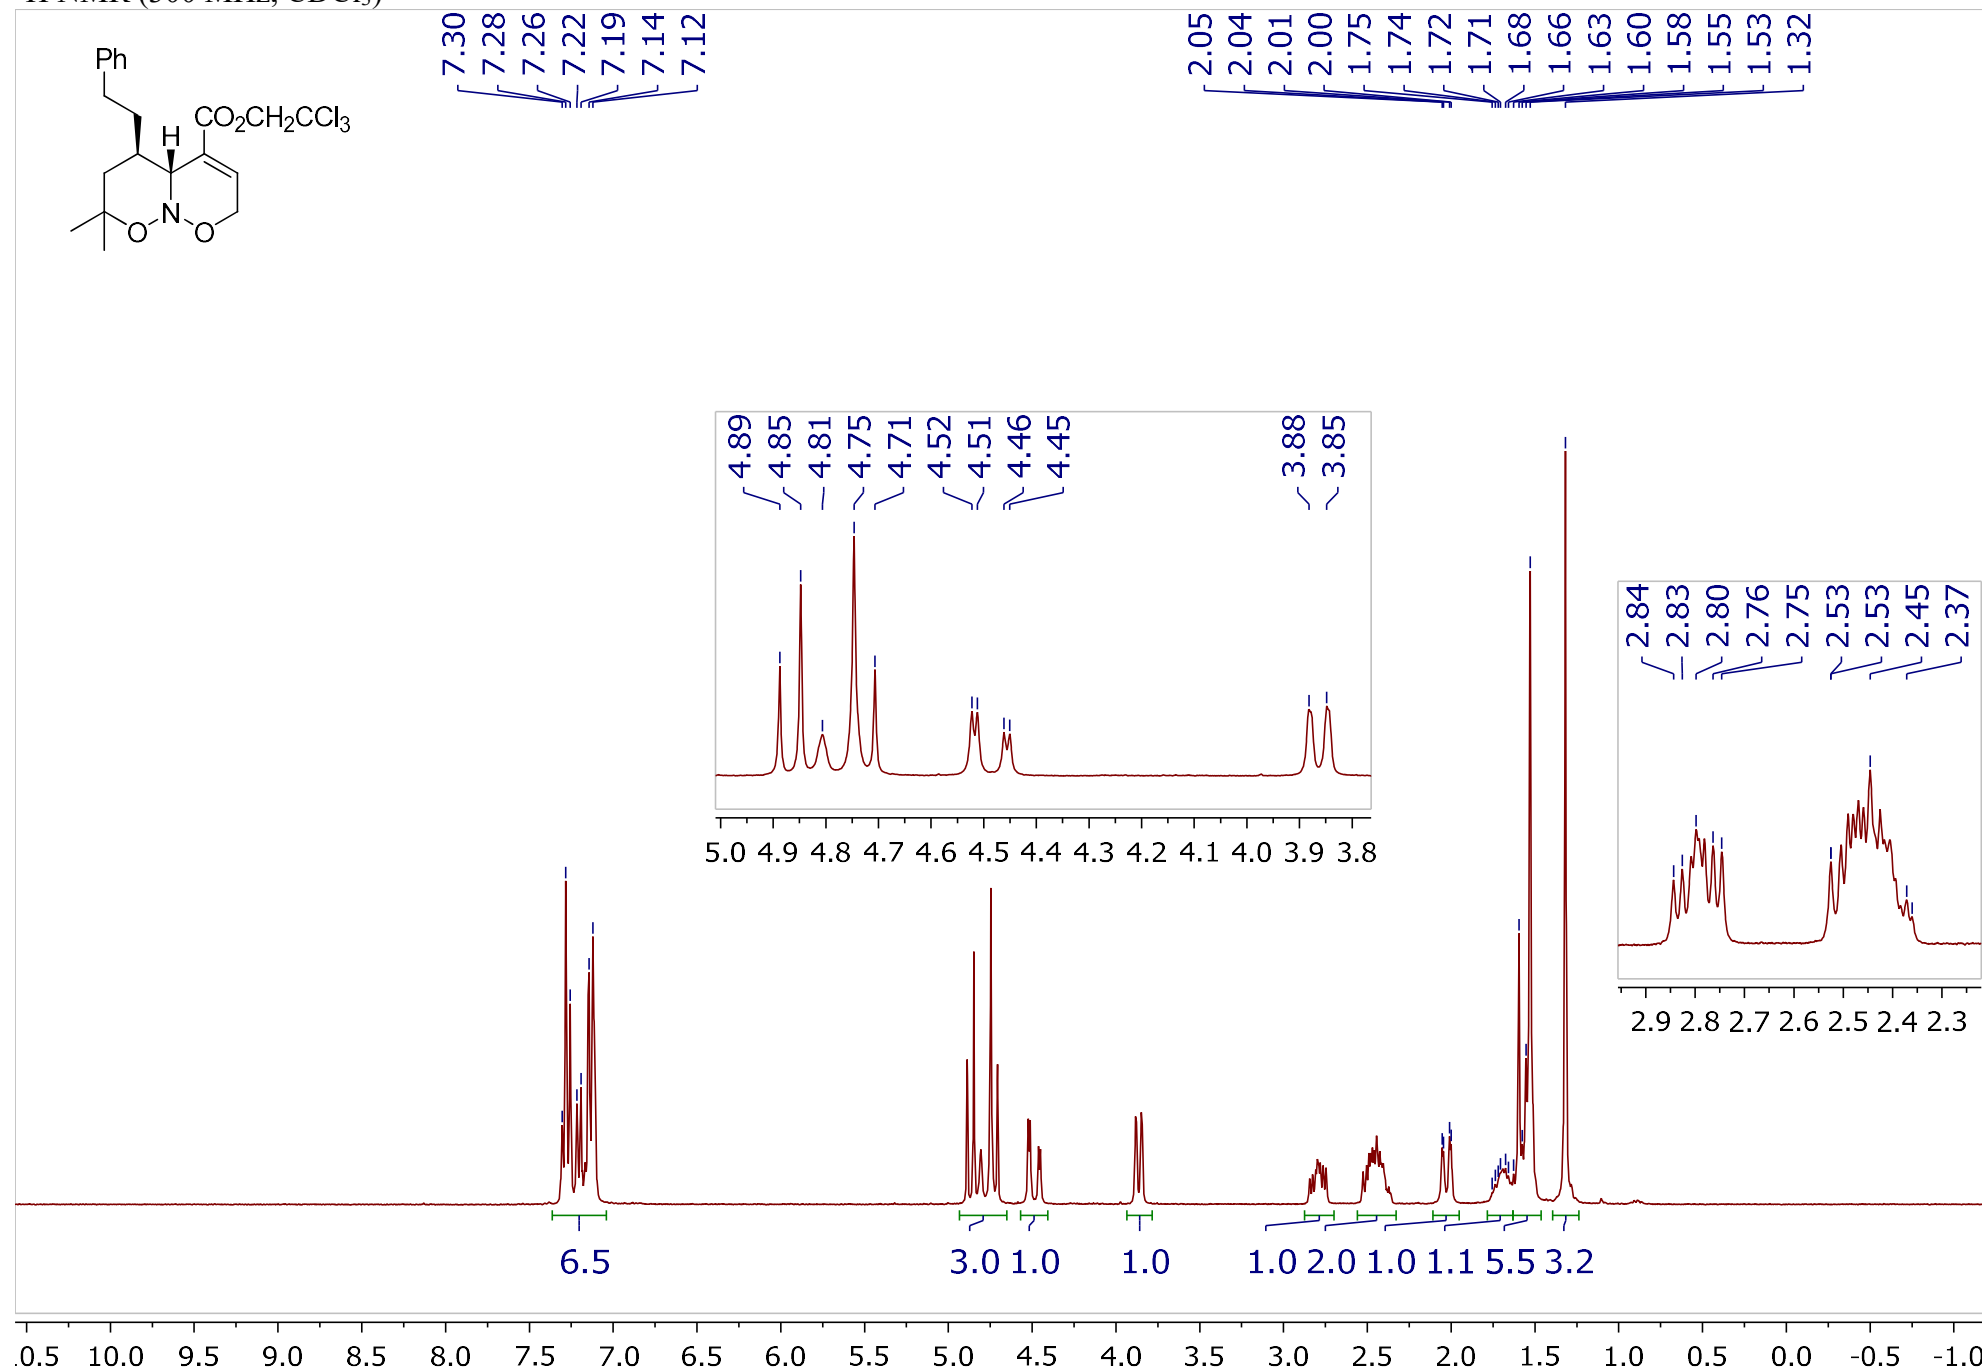

$^{13}\text{C}$  NMR (75 MHz,  $\text{CDCl}_3$ )

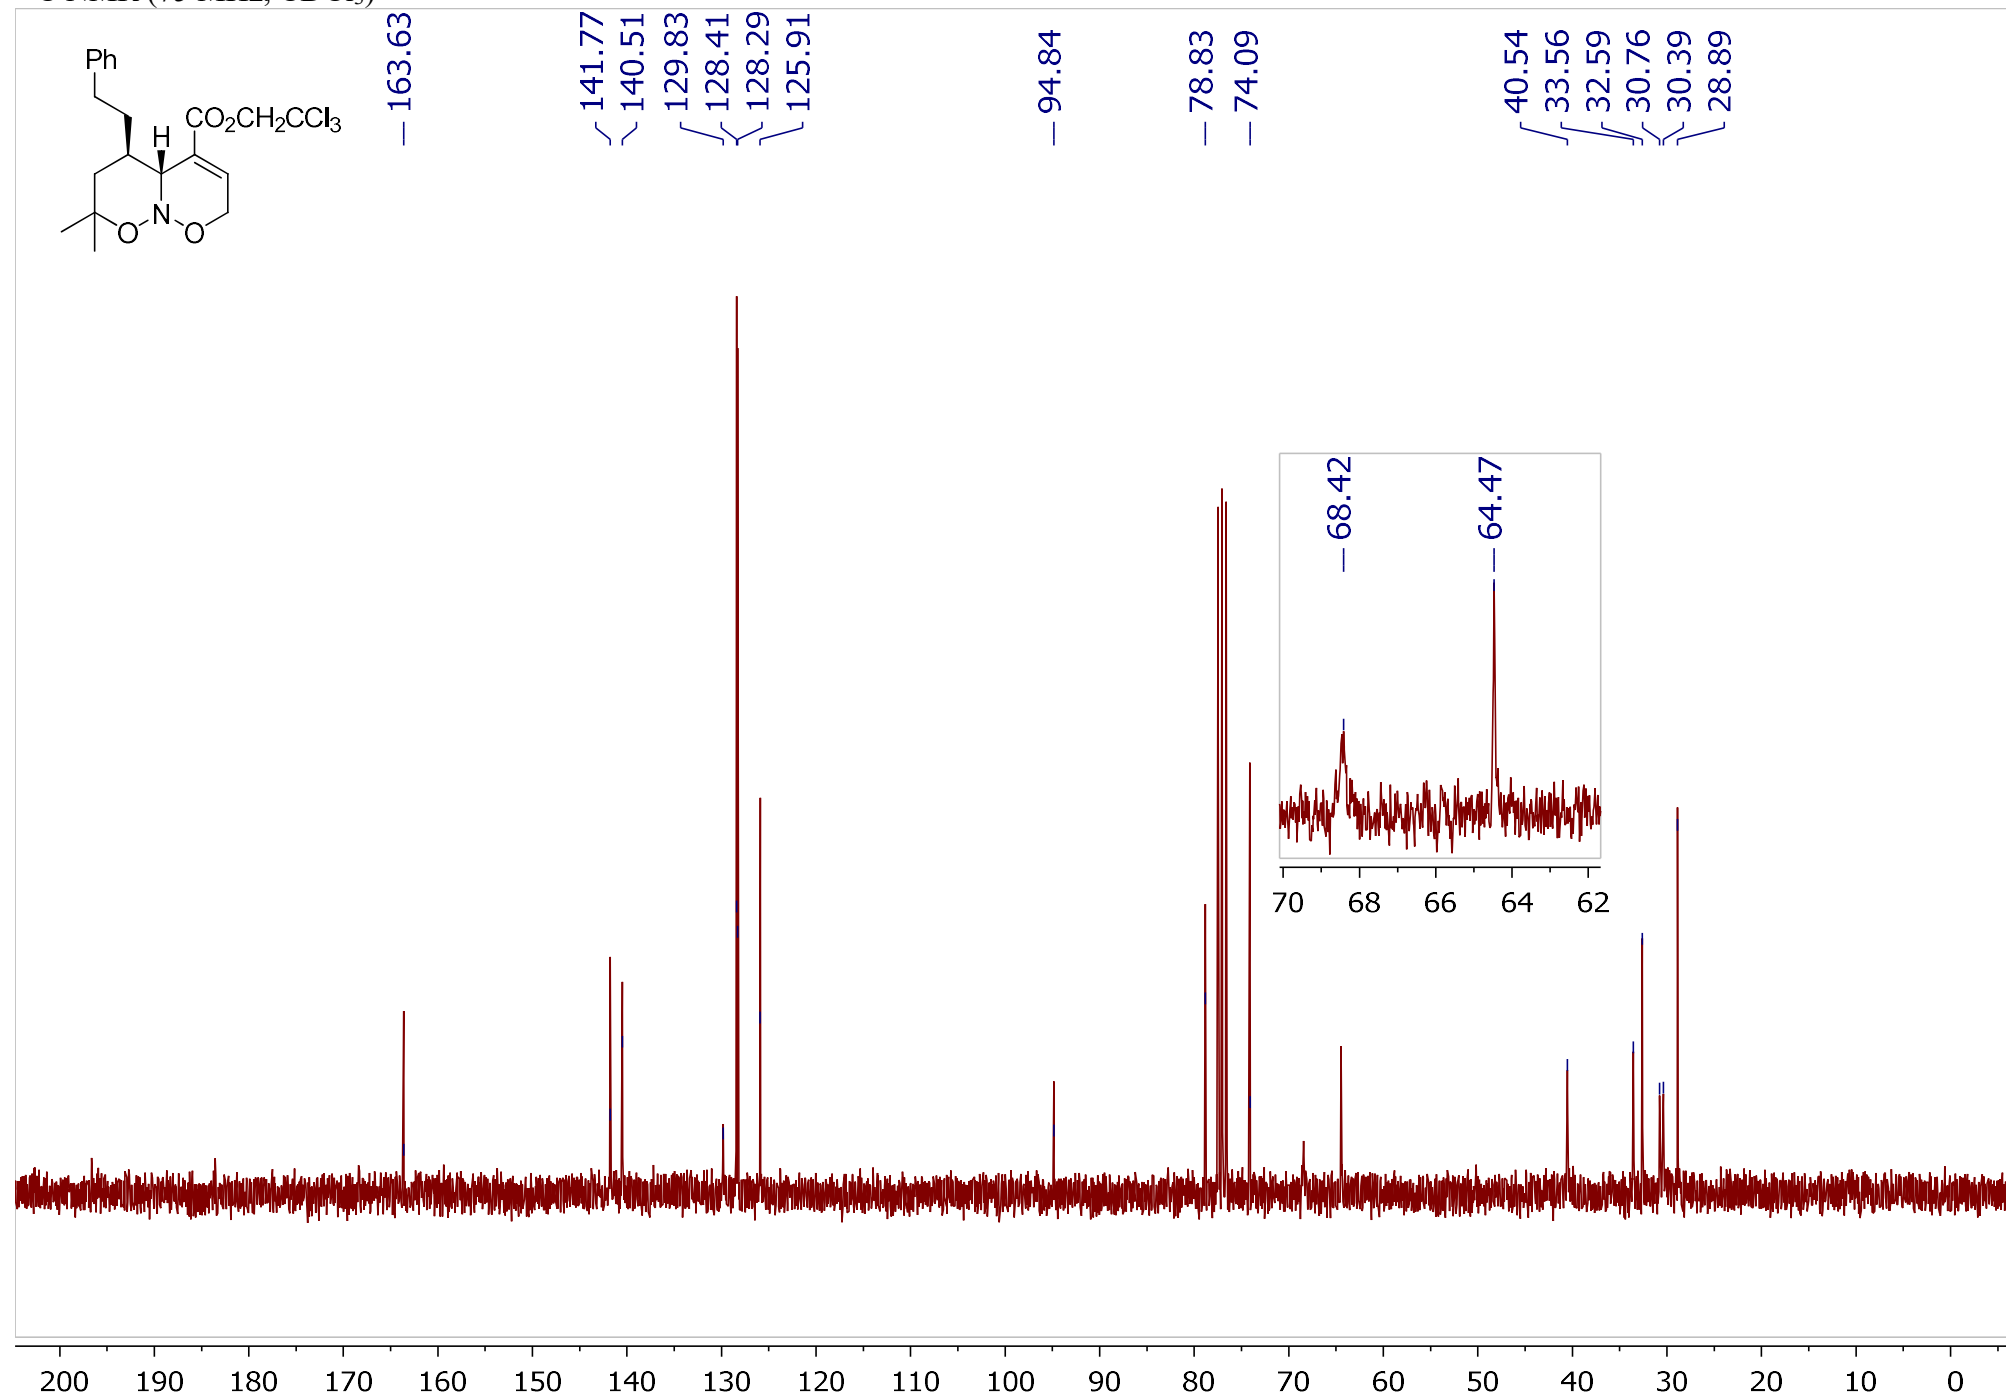

Chemical structure of the compound is shown in the top left corner. The structure is a bicyclic system with a phenyl group (Ph) and a  $\text{CO}_2\text{CH}_2\text{CCl}_3$  group. The structure is a bicyclic system with a phenyl group (Ph) and a  $\text{CO}_2\text{CH}_2\text{CCl}_3$  group.

The  $^{13}\text{C}$  NMR spectrum shows peaks at the following chemical shifts (ppm):

- 140.51
- 128.41
- 128.29
- 125.91
- 74.12
- 68.45
- 64.47
- 40.55
- 33.57
- 32.60
- 30.76
- 30.40
- 28.89

The spectrum displays a complex pattern of peaks, with a prominent peak at 140.51 ppm and several smaller peaks in the aromatic region (125-130 ppm). The aliphatic region (30-40 ppm) shows multiple peaks, and the solvent peak is visible at 74.12 ppm.



$^1\text{H}$ - $^1\text{H}$  COSY

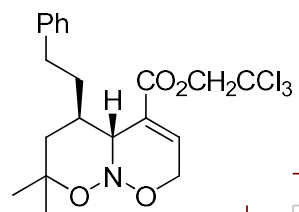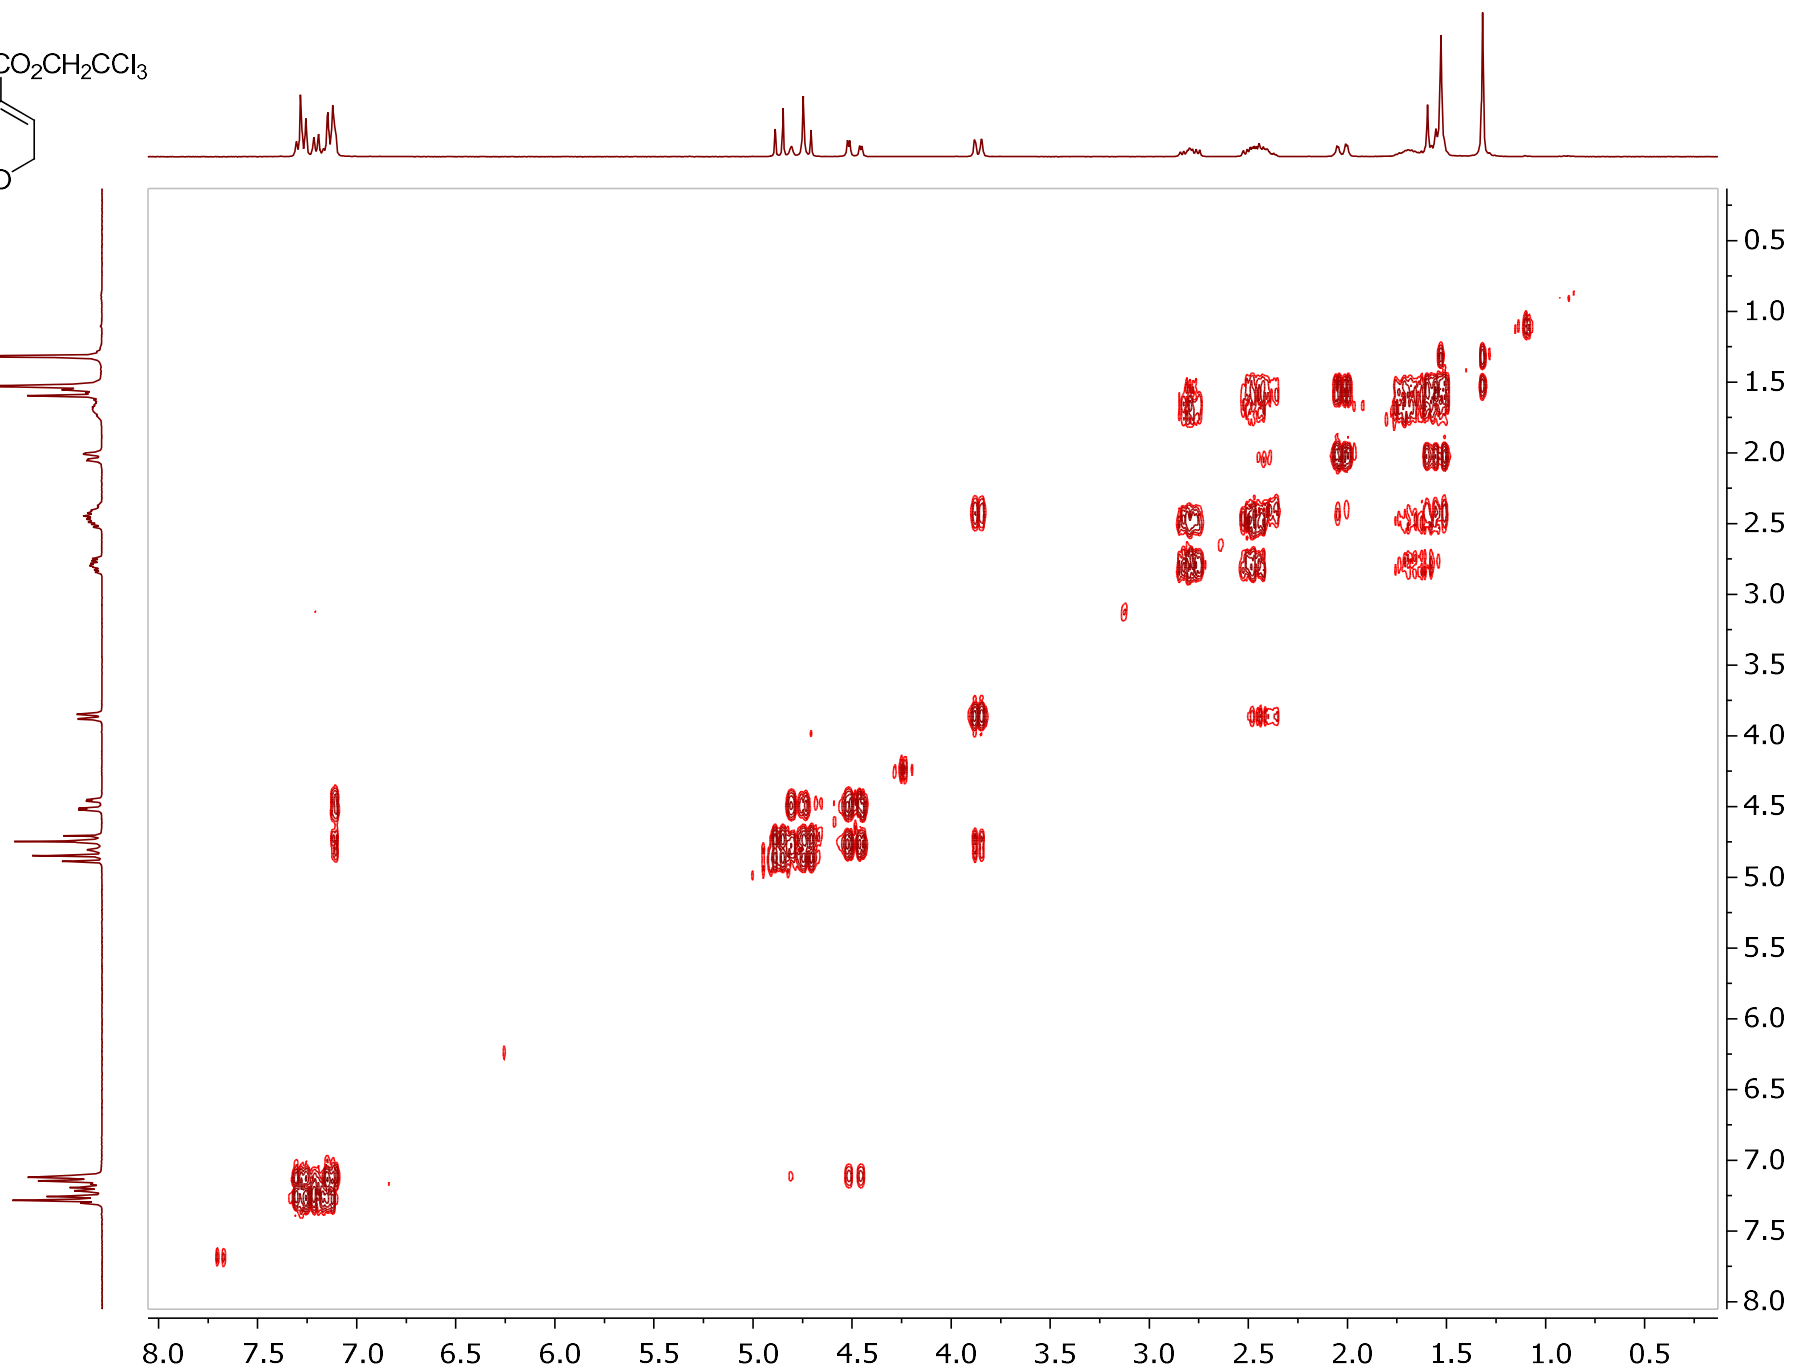

$^1\text{H}$ - $^{13}\text{C}$  HSQC

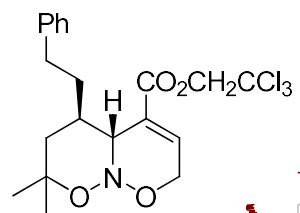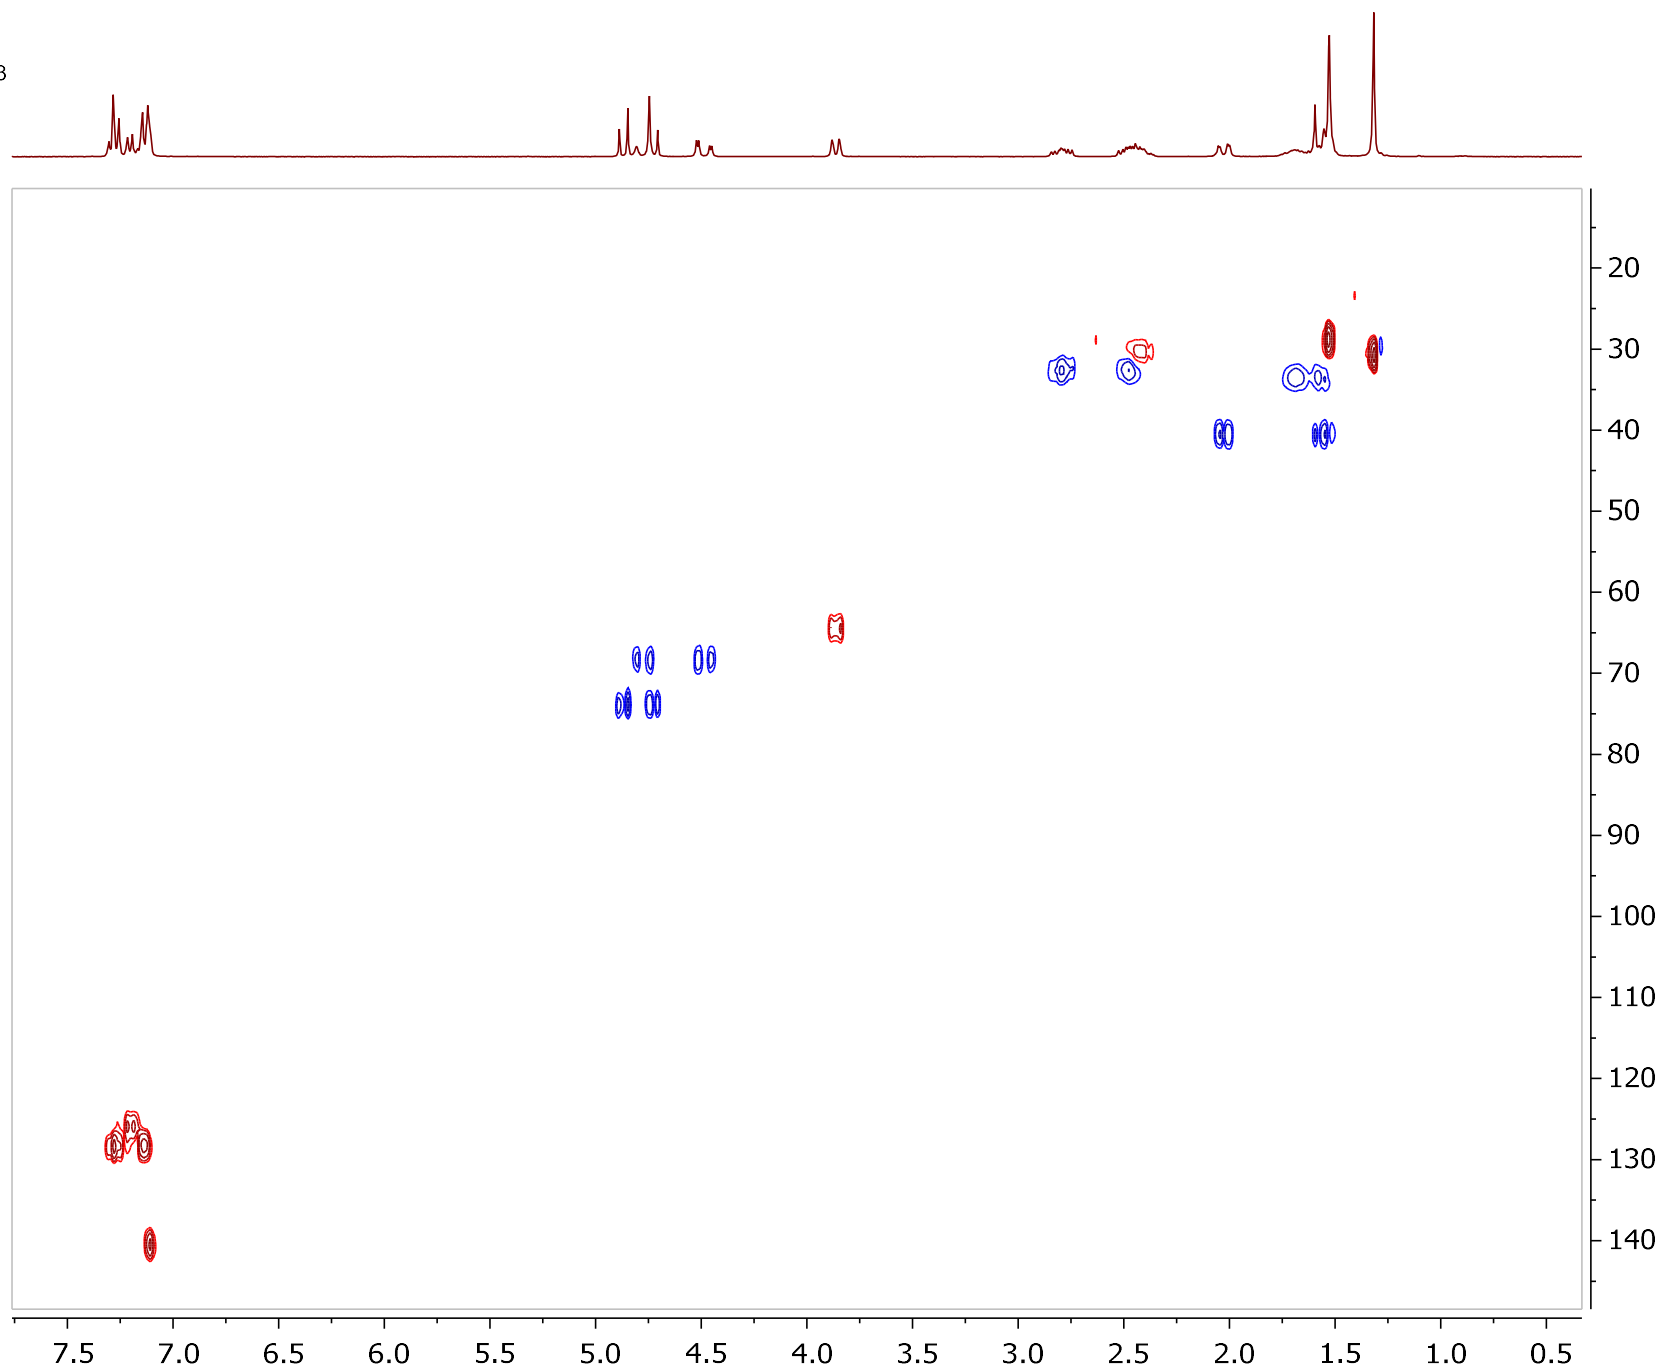

**2,2,2-Trichloroethyl (4aR\*,5S\*,7R\*)-5,7-diphenyl-4a,5,6,7-tetrahydro-2H-[1,2]oxazino[2,3-b][1,2]oxazine-4-carboxylate 3n**

<sup>1</sup>H NMR (300 MHz, CDCl<sub>3</sub>)

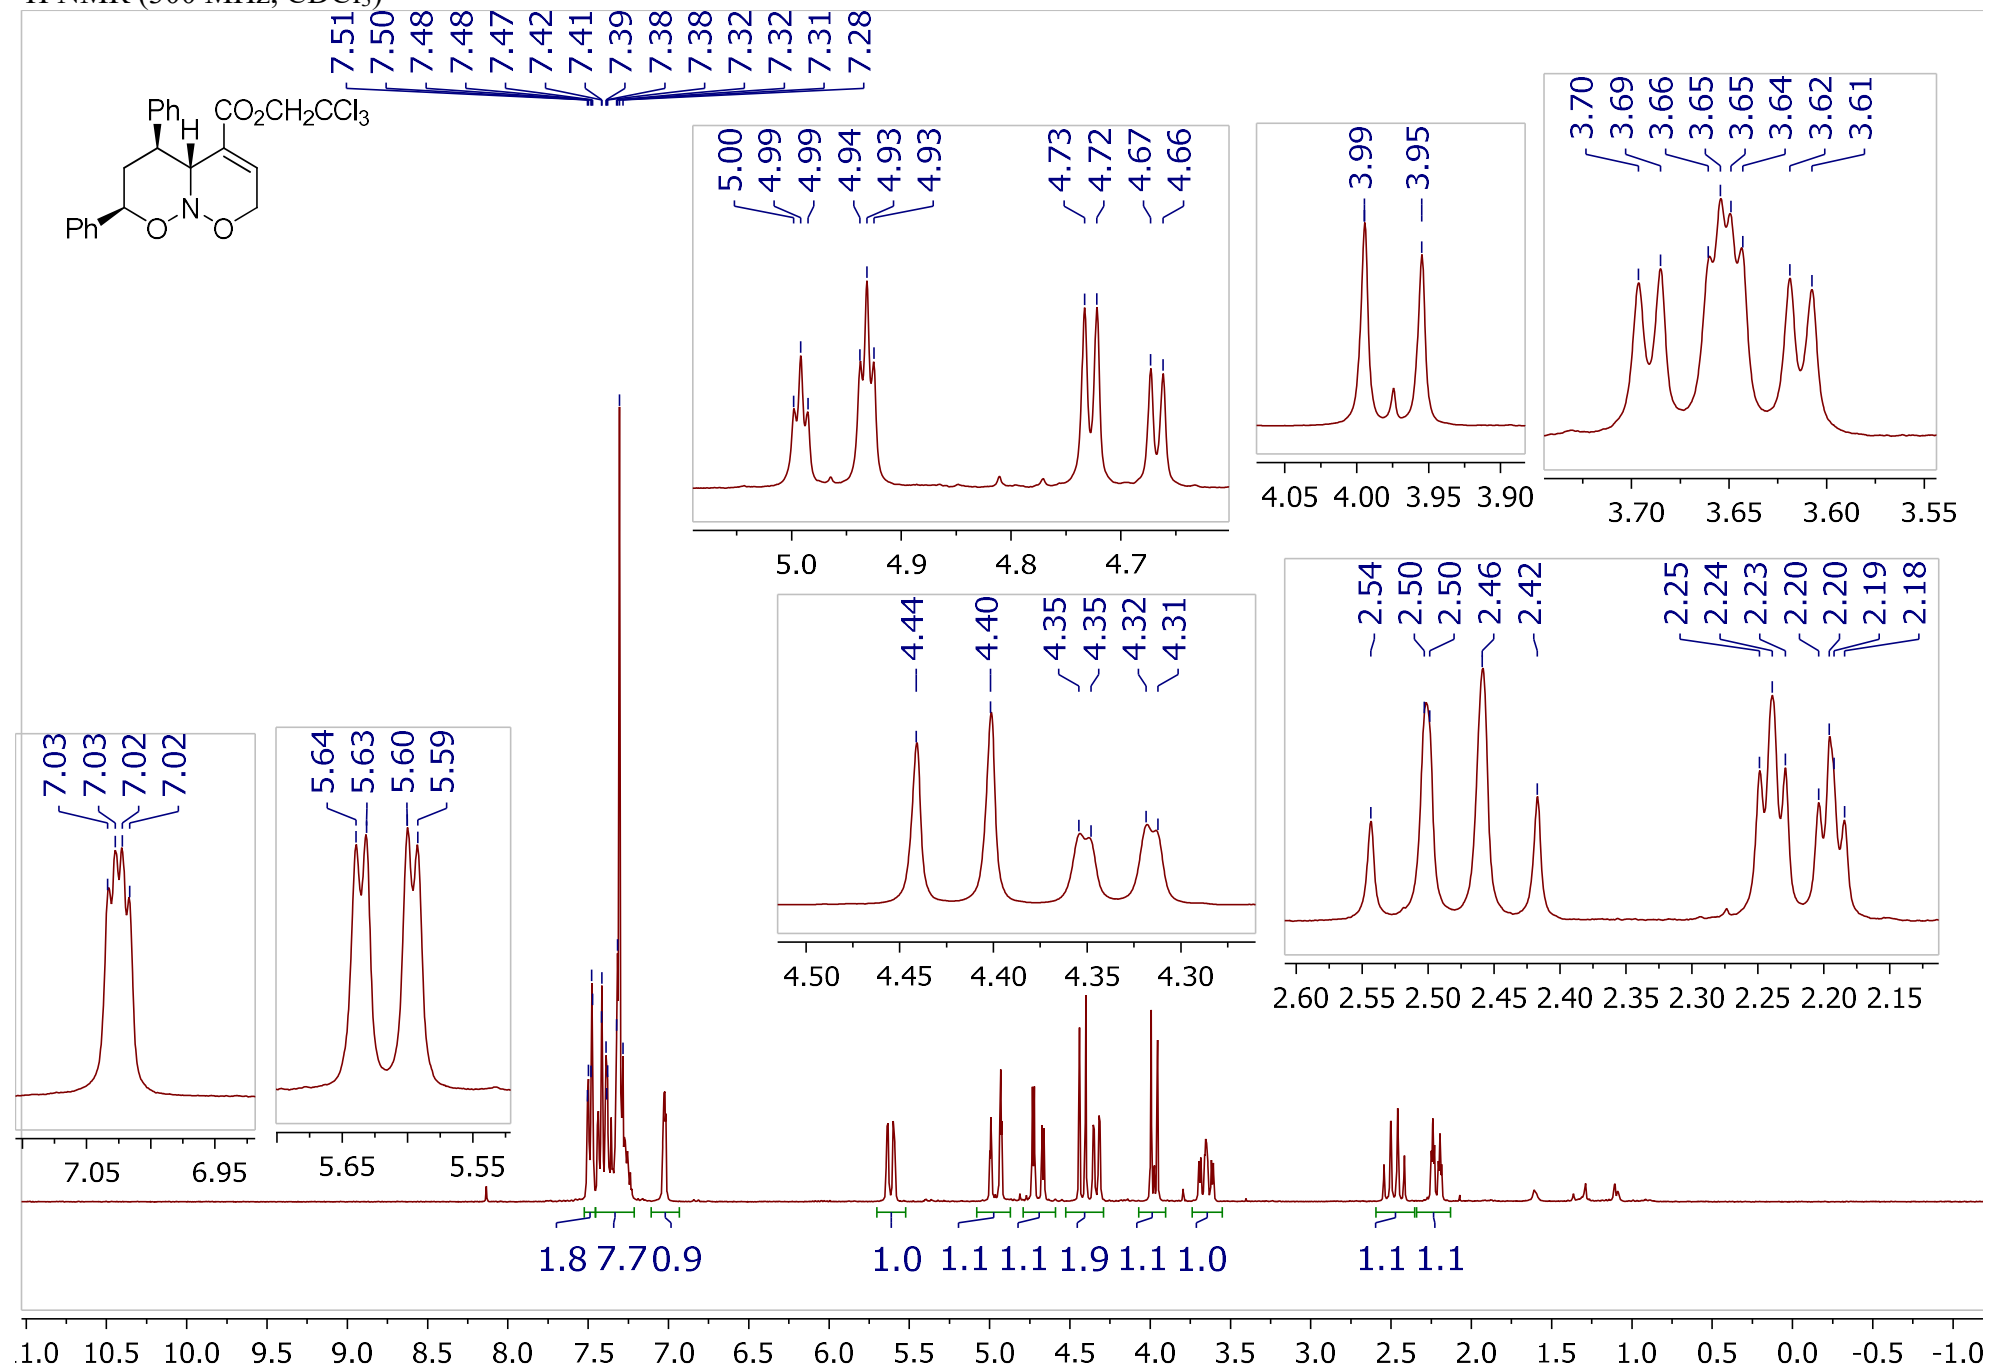

<sup>13</sup>C NMR (75 MHz, CDCl<sub>3</sub>)

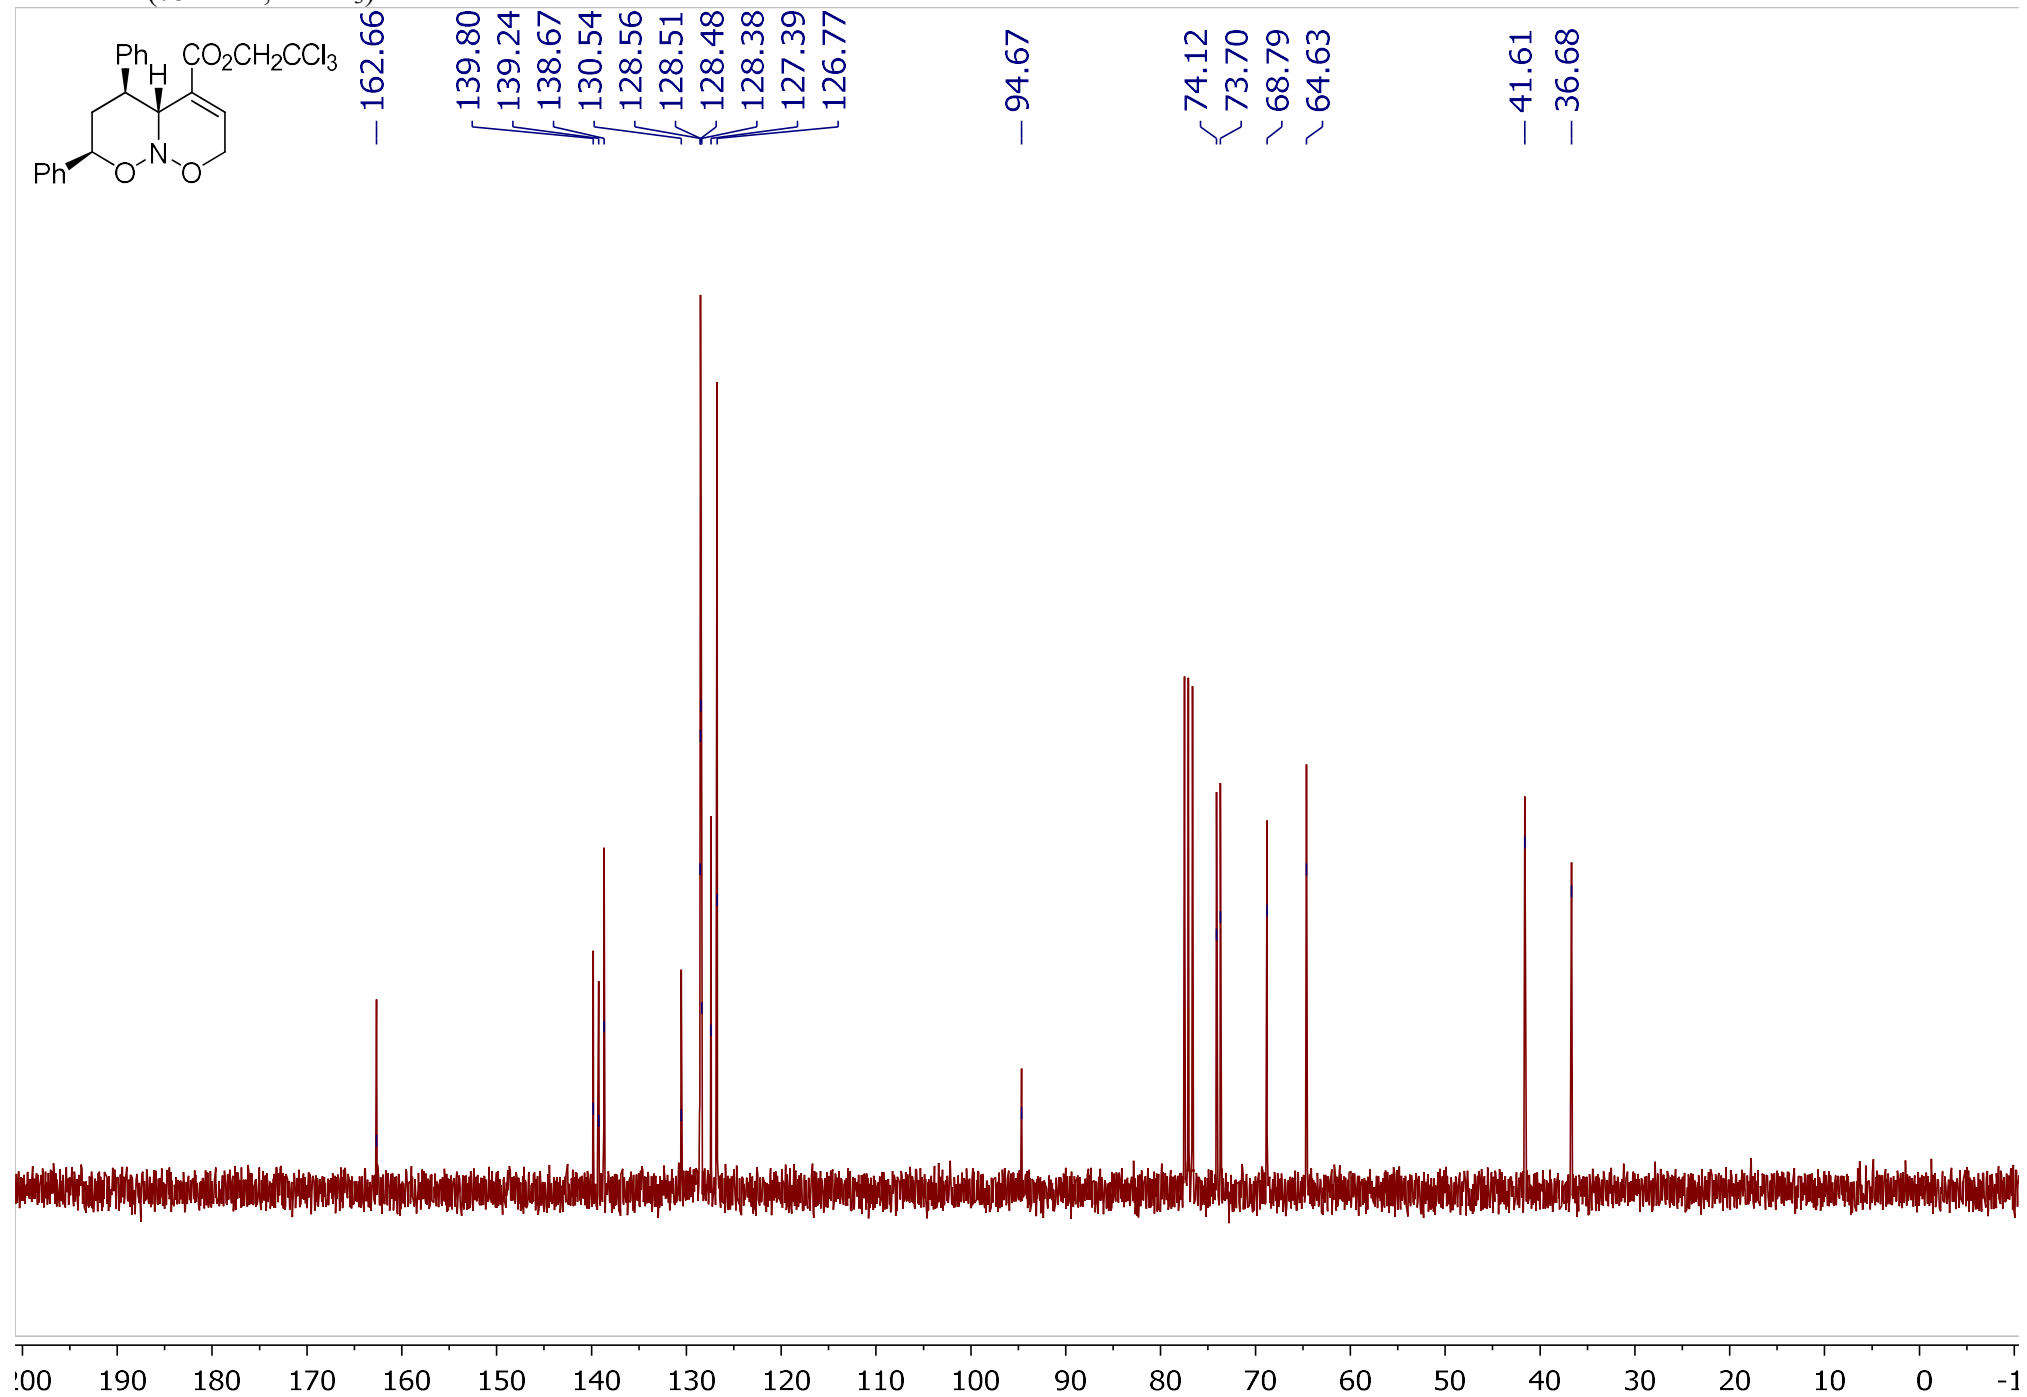

$^{13}\text{C}$  DEPT 135 (75 MHz,  $\text{CDCl}_3$ )

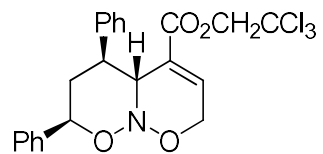

138.67  
128.56  
128.51  
128.48  
128.38  
127.39  
126.77

74.12  
73.70  
68.79  
64.62

41.60  
36.68

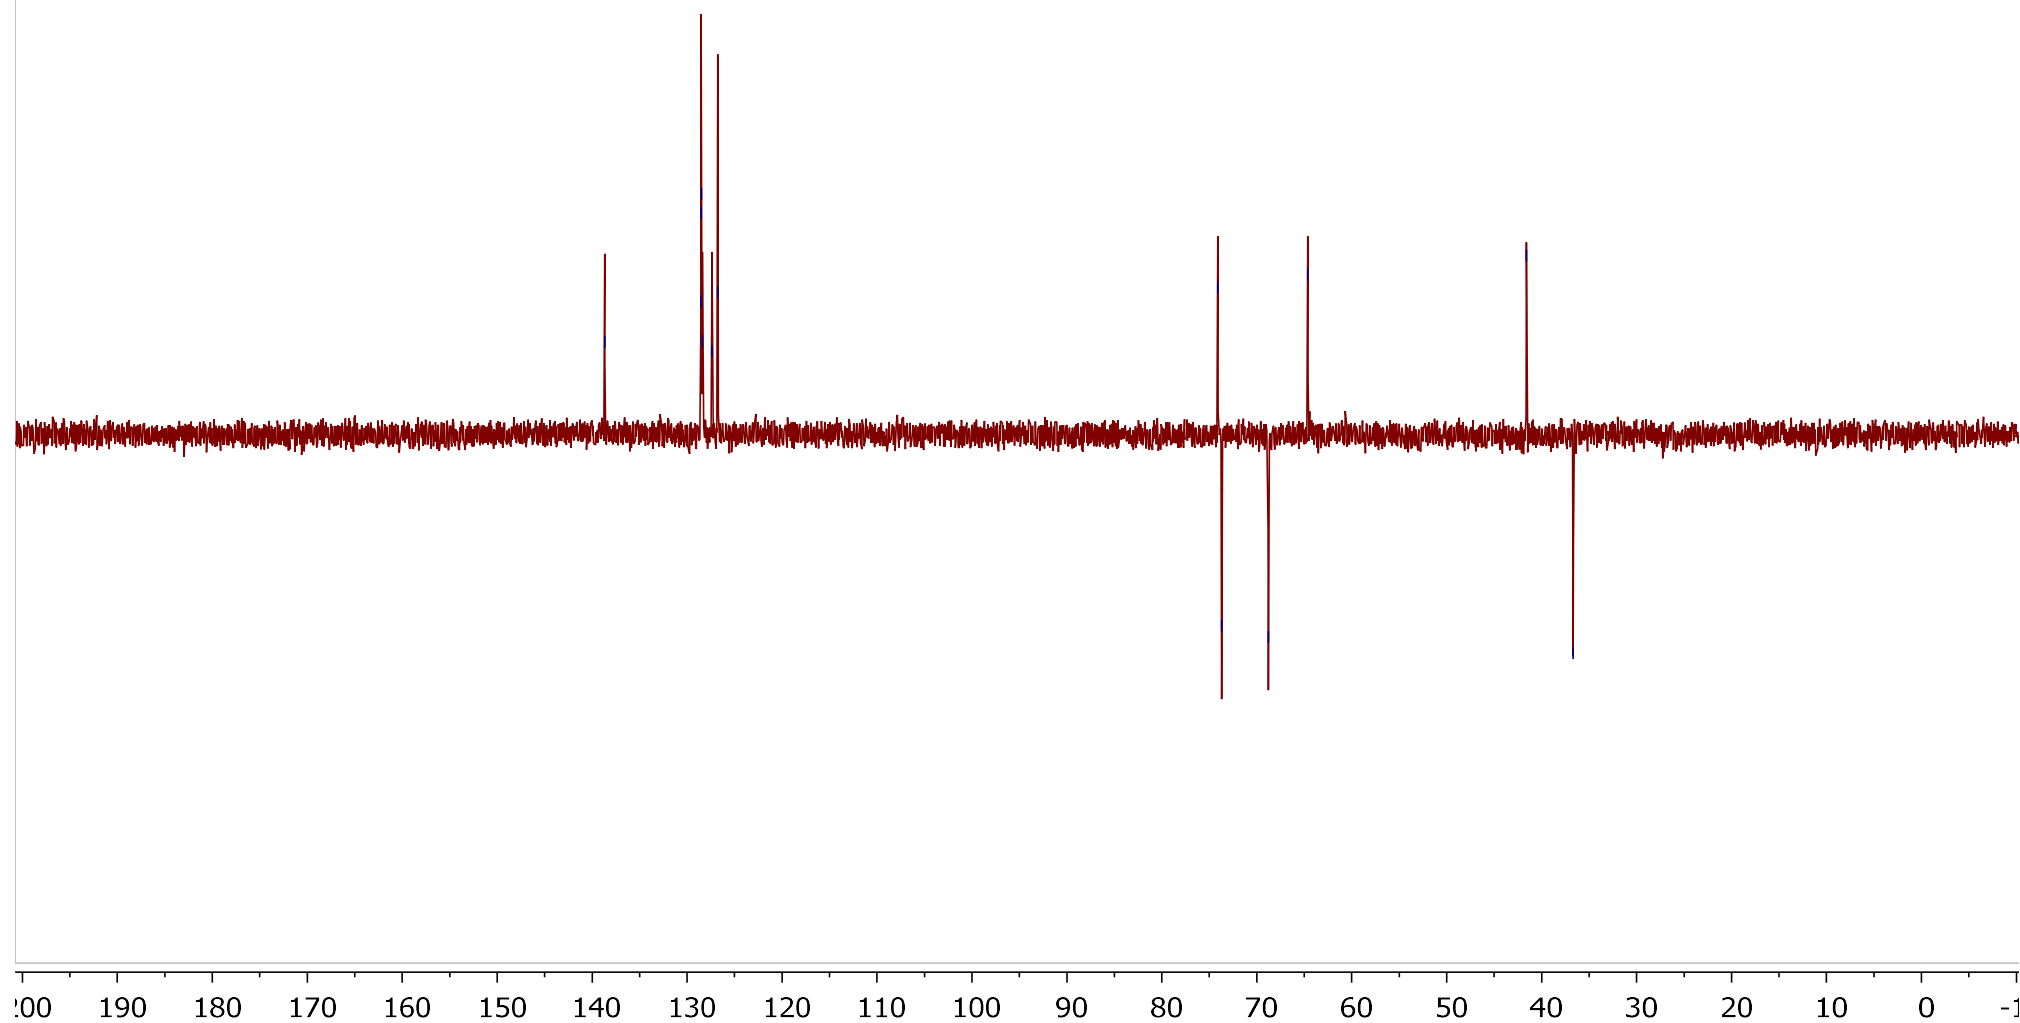

<sup>1</sup>H-<sup>1</sup>H COSY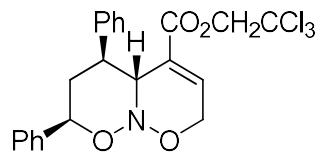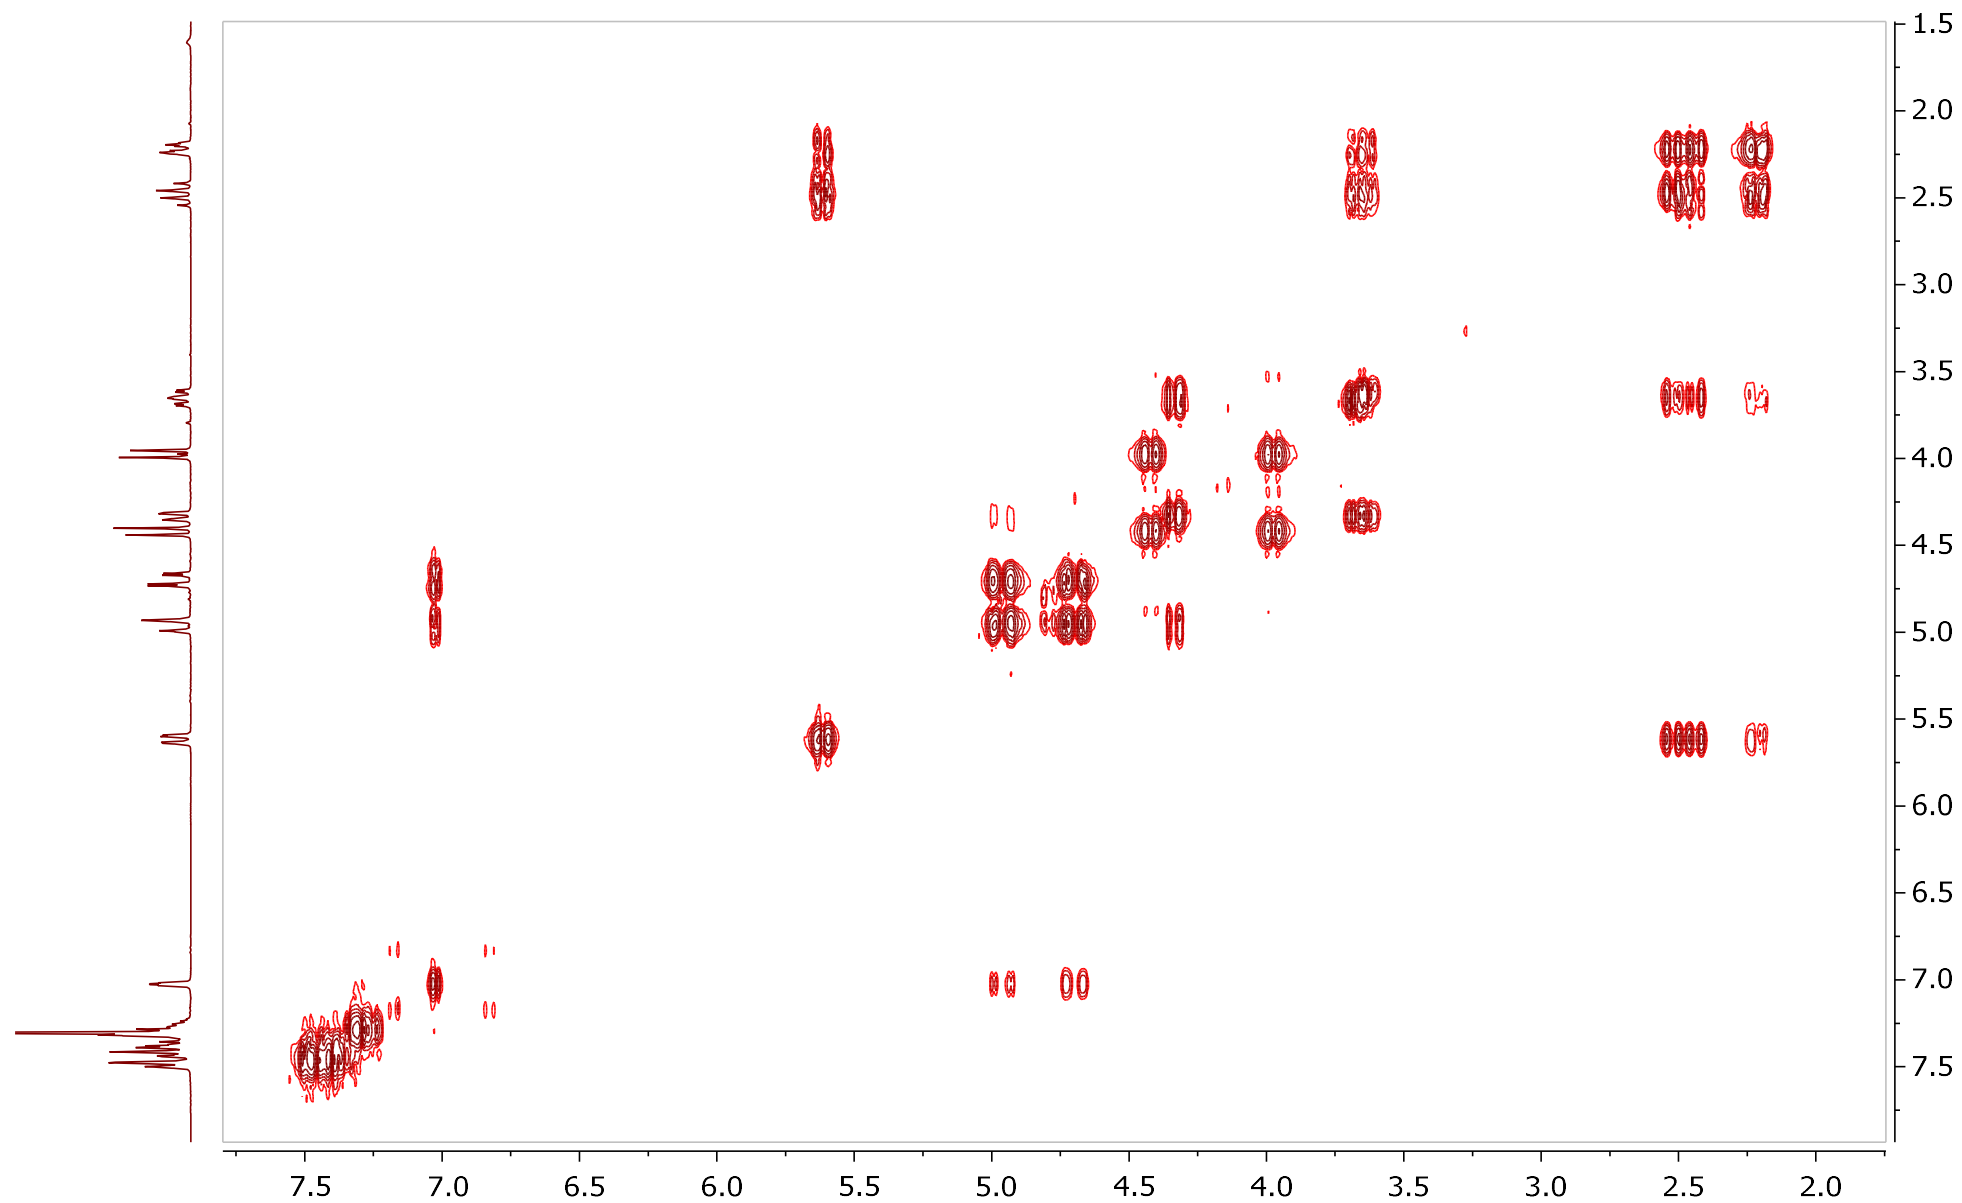

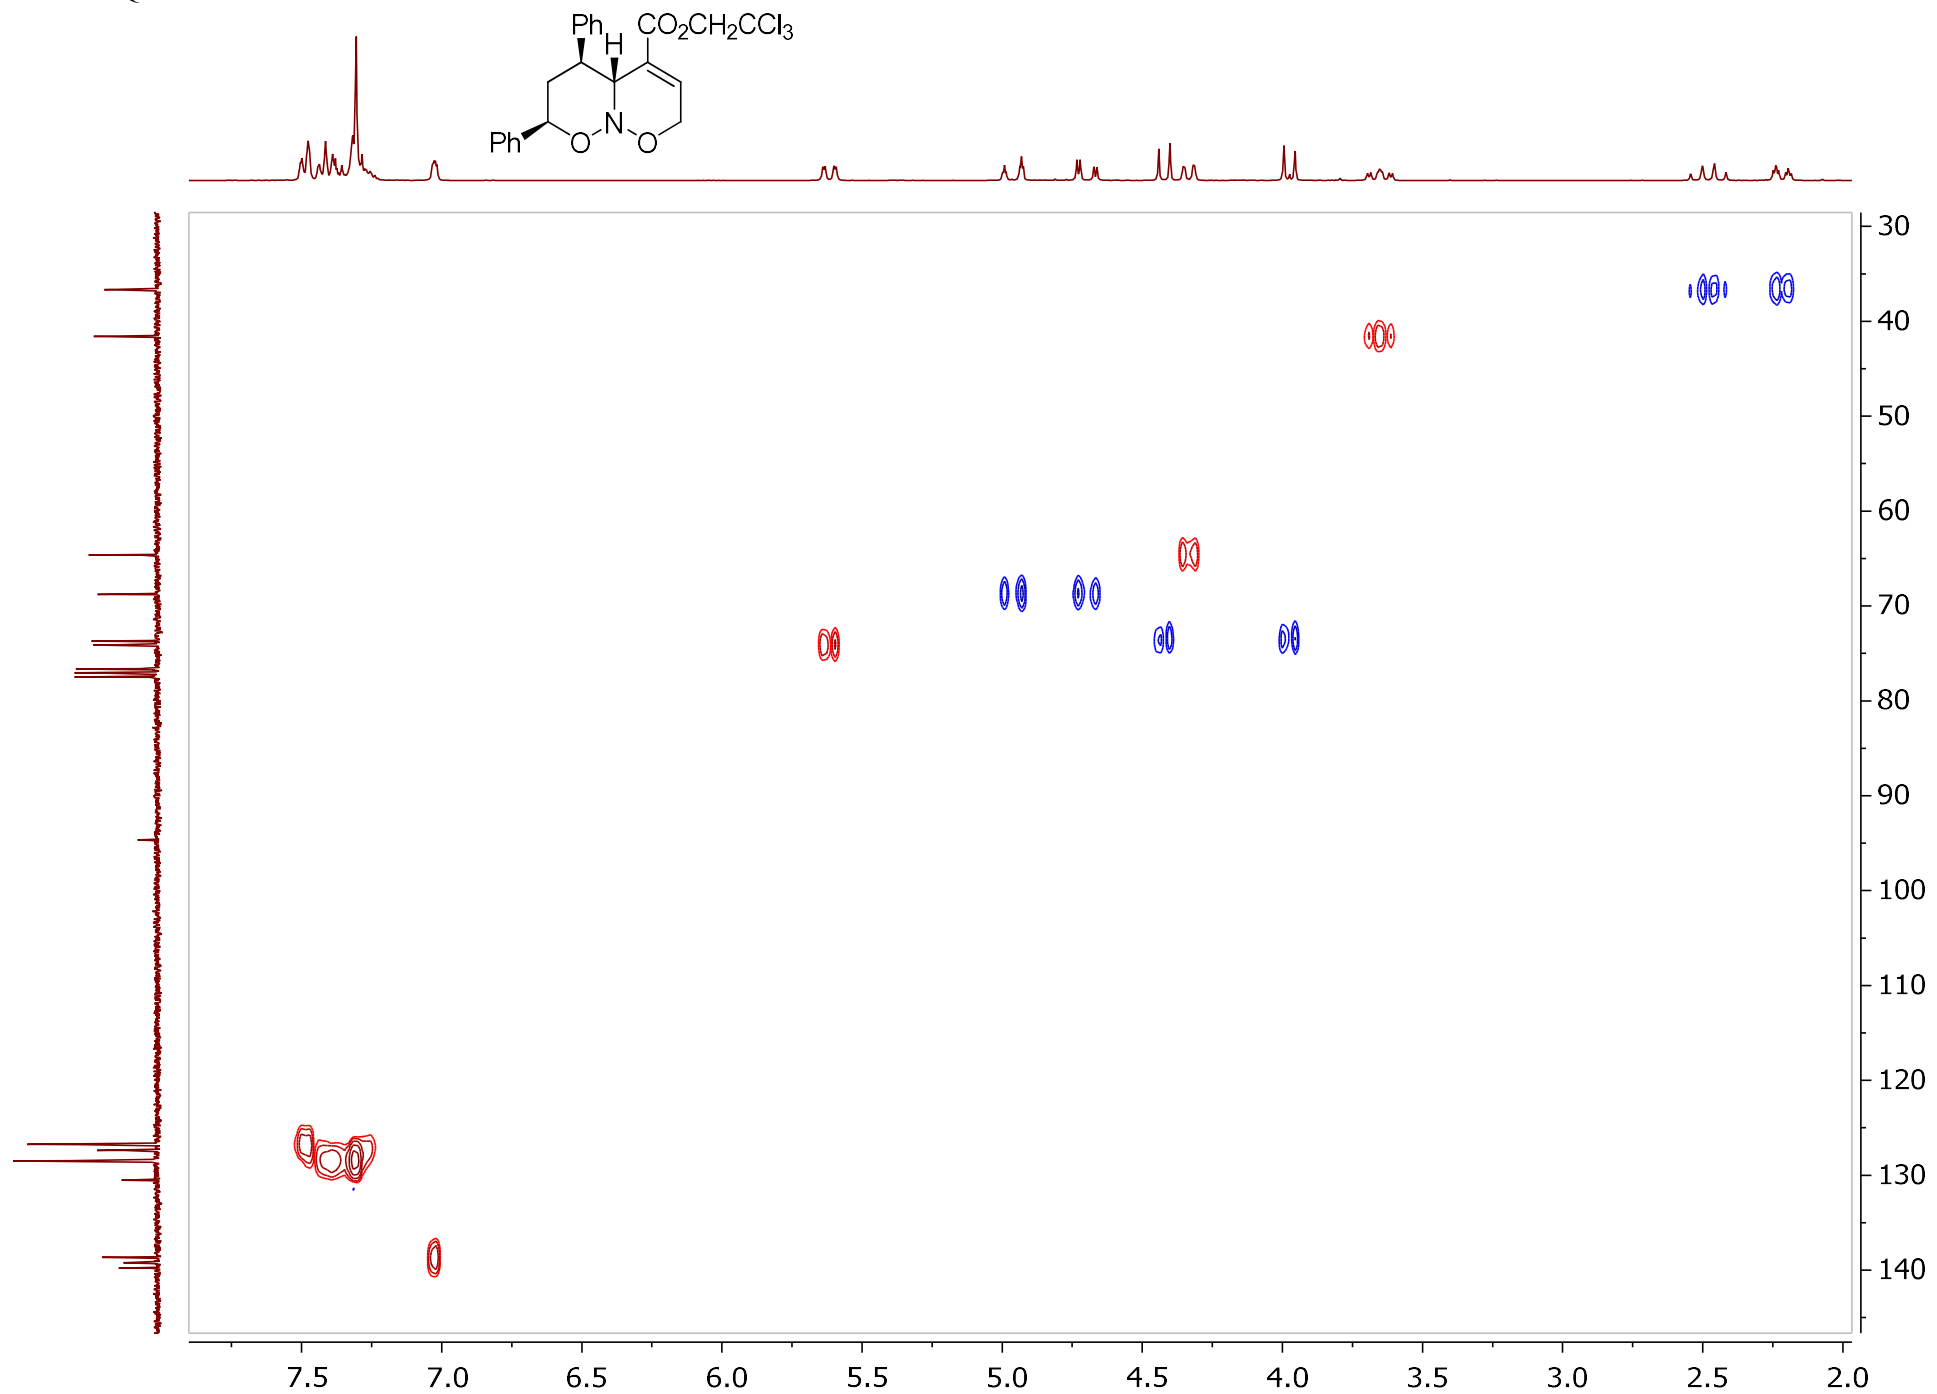

$^1\text{H}$ - $^1\text{H}$  NOESY

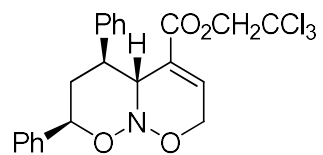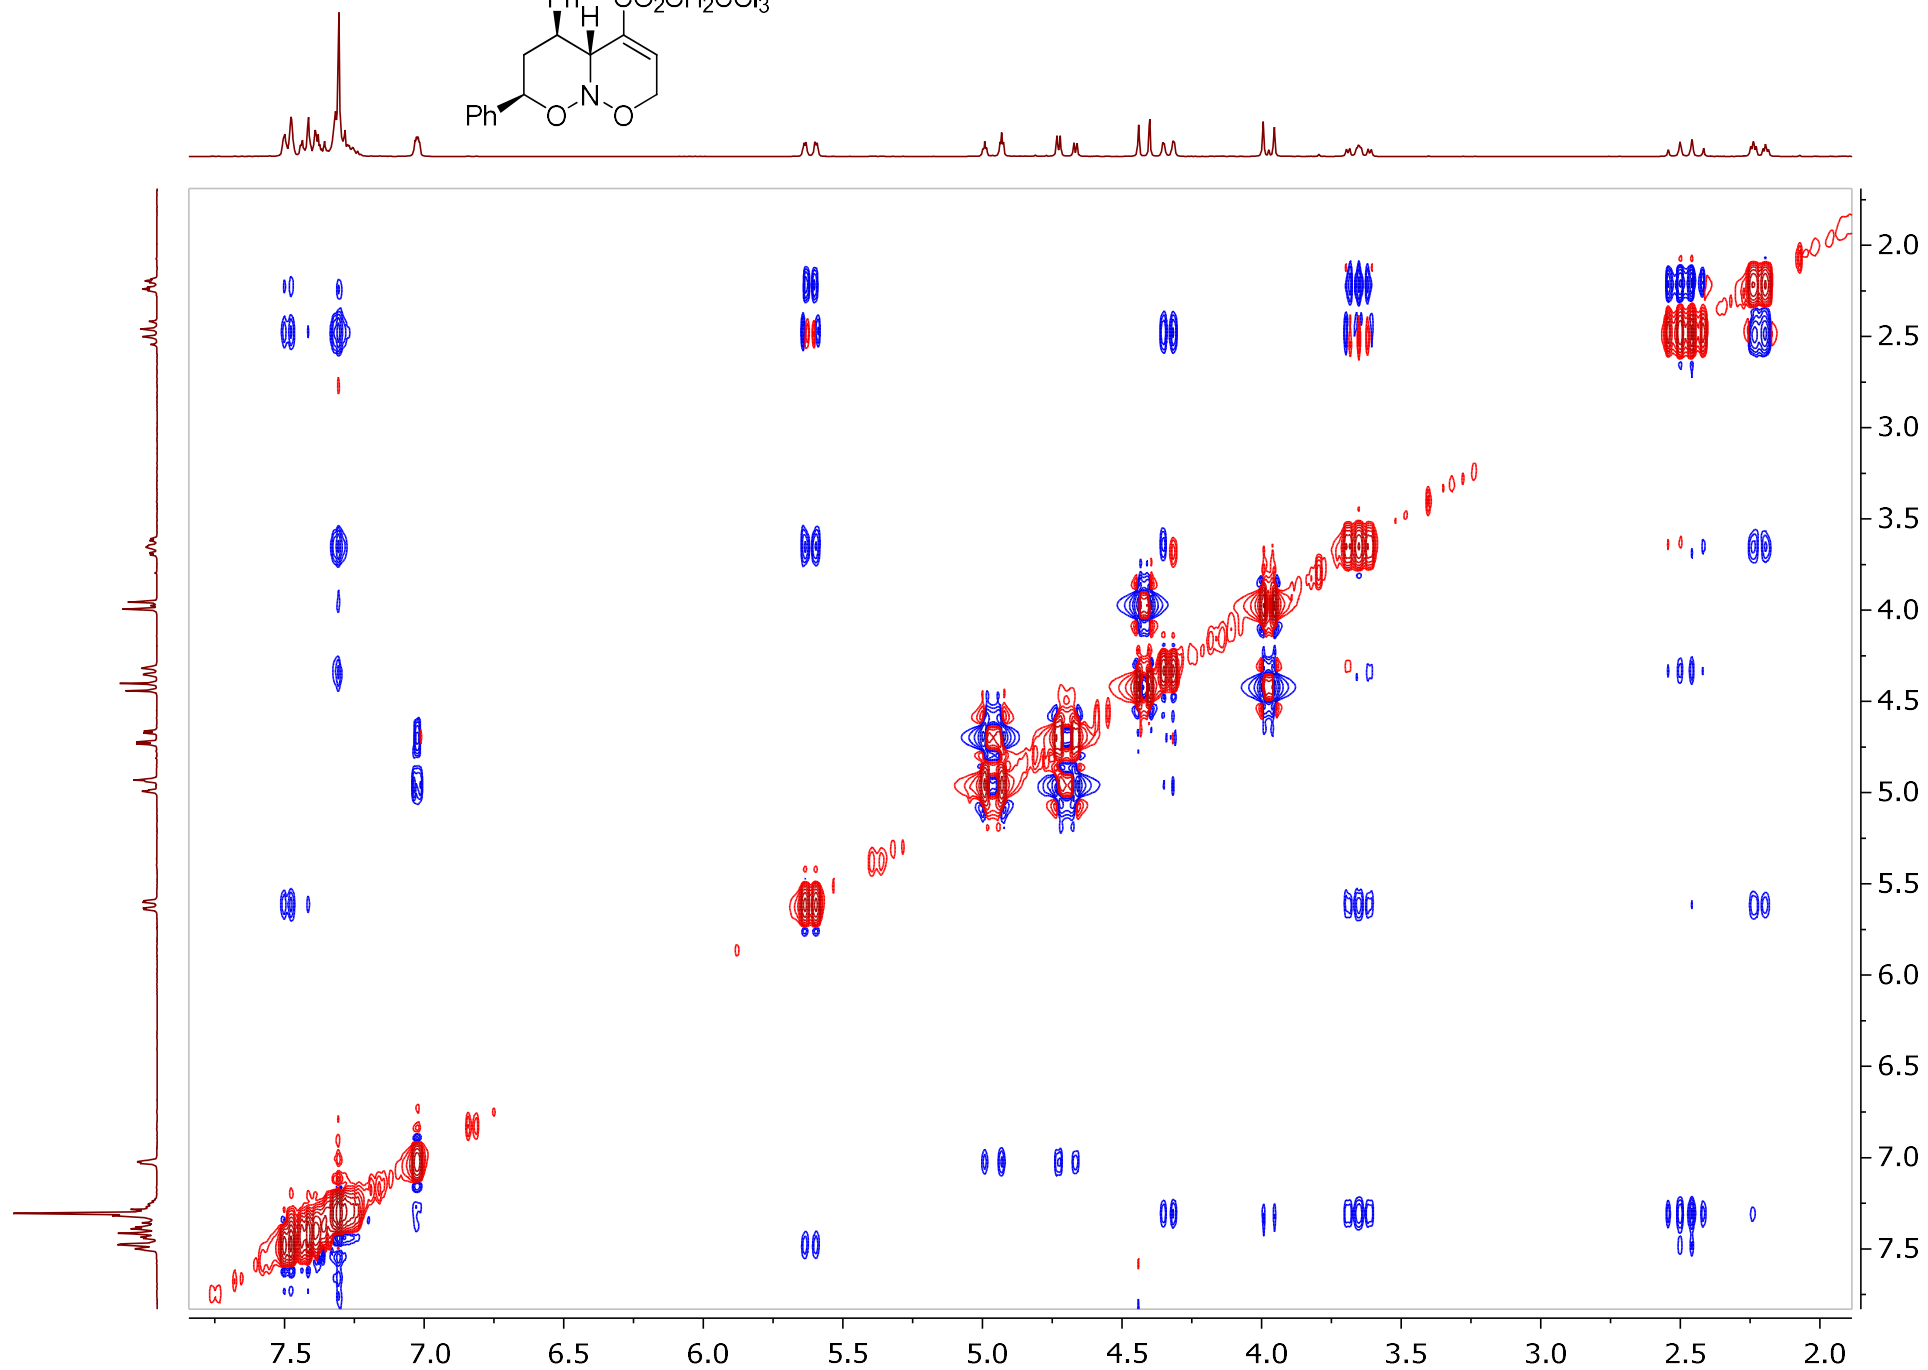



**2,2,2-Trichloroethyl (4aR\*,5S\*,7S\*)-7-ethoxy-5-(4-methoxyphenyl)-4a,5,6,7-tetrahydro-2H-[1,2]oxazino[2,3-b][1,2]oxazine-4-carboxylate 3o**

$^1\text{H}$  NMR (300 MHz,  $\text{CDCl}_3$ )

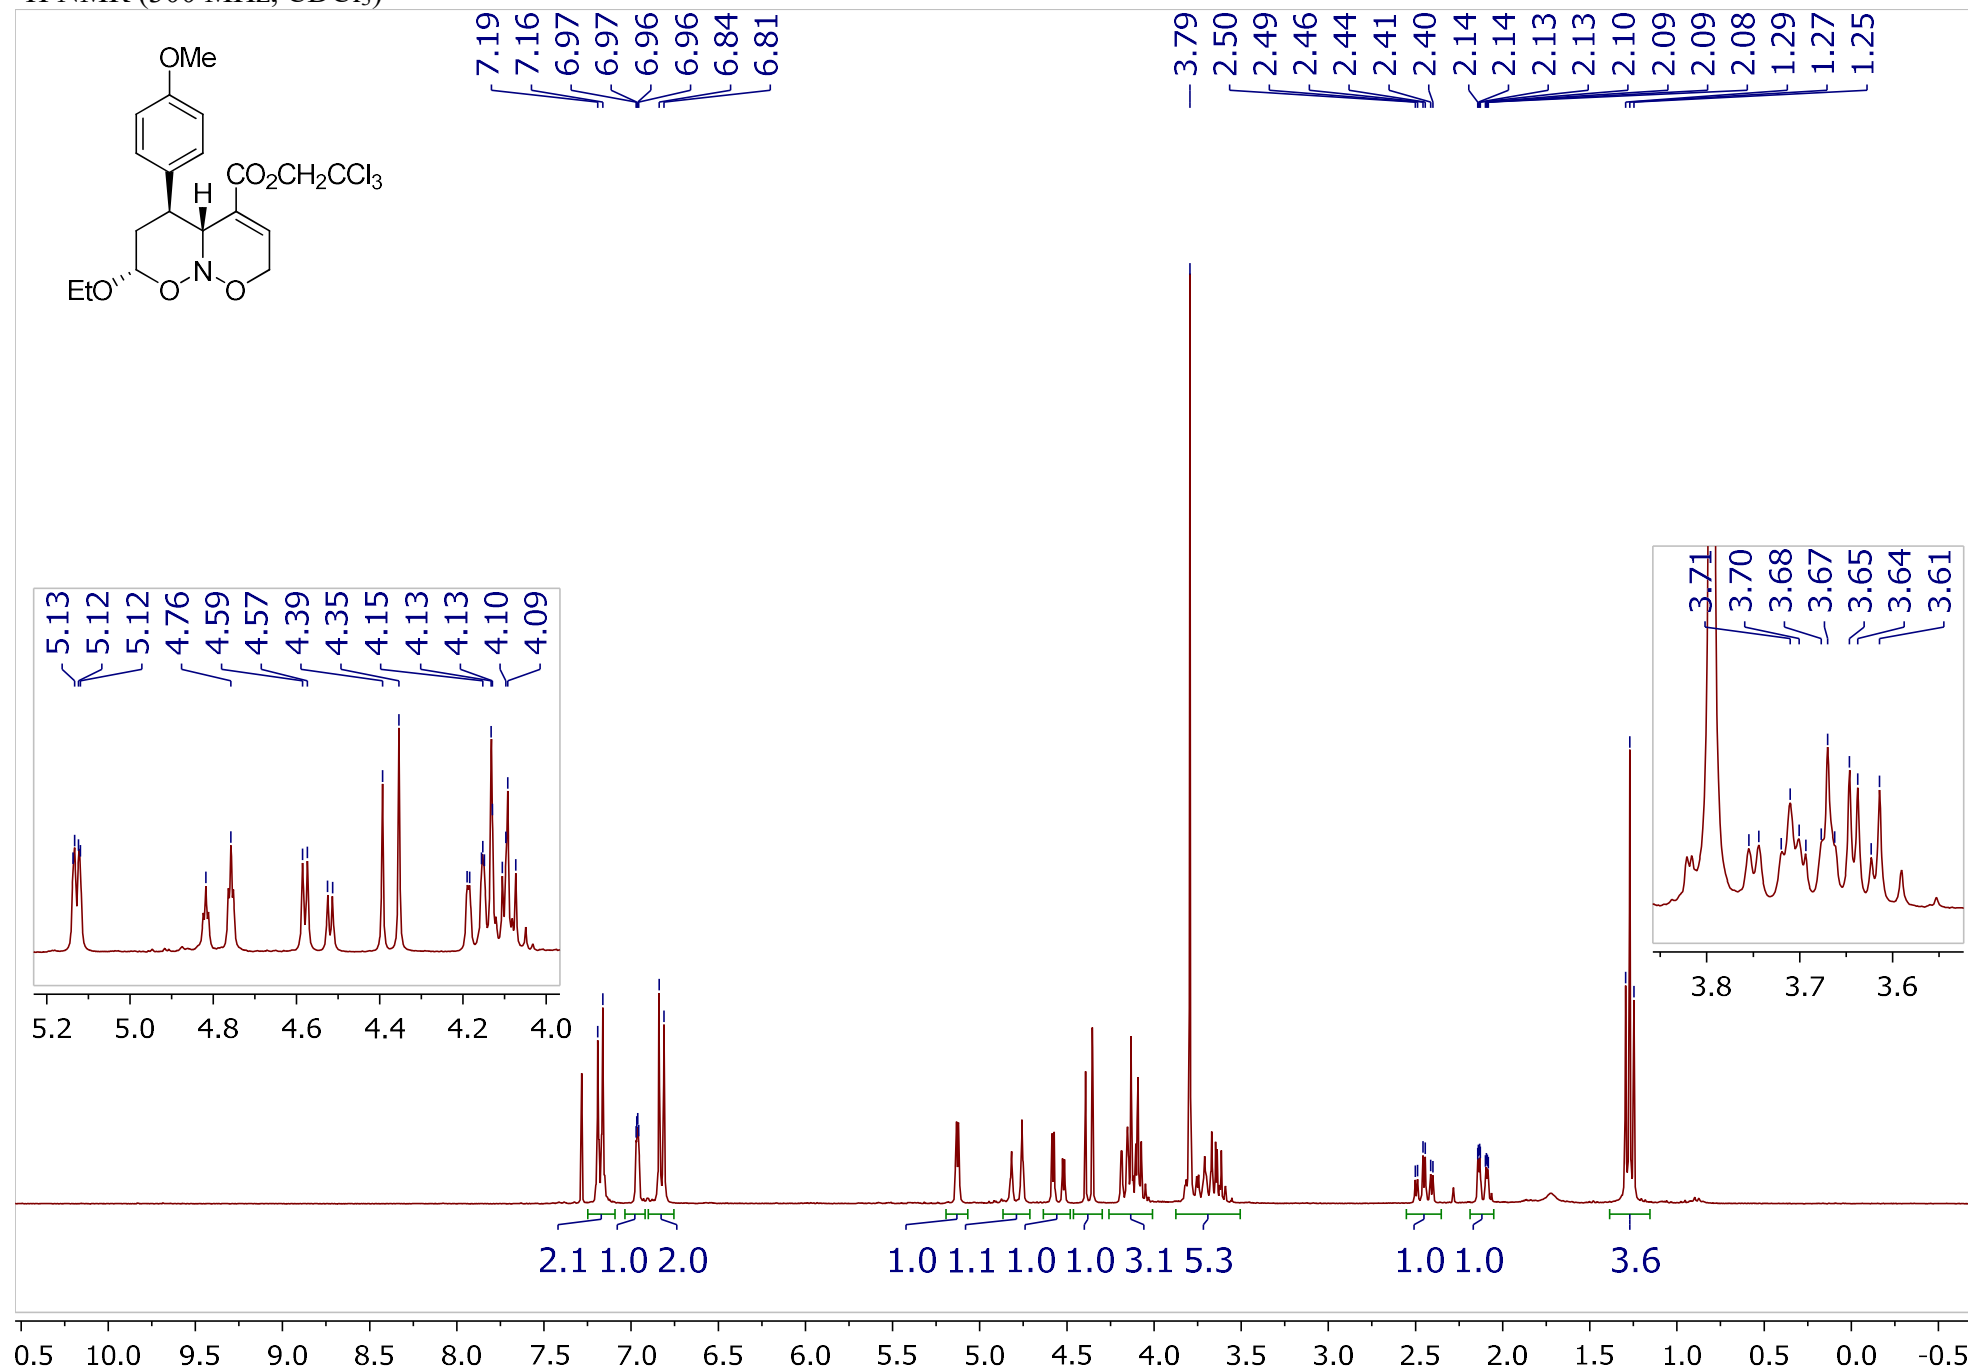

$^{13}\text{C}$  NMR (75 MHz,  $\text{CDCl}_3$ )

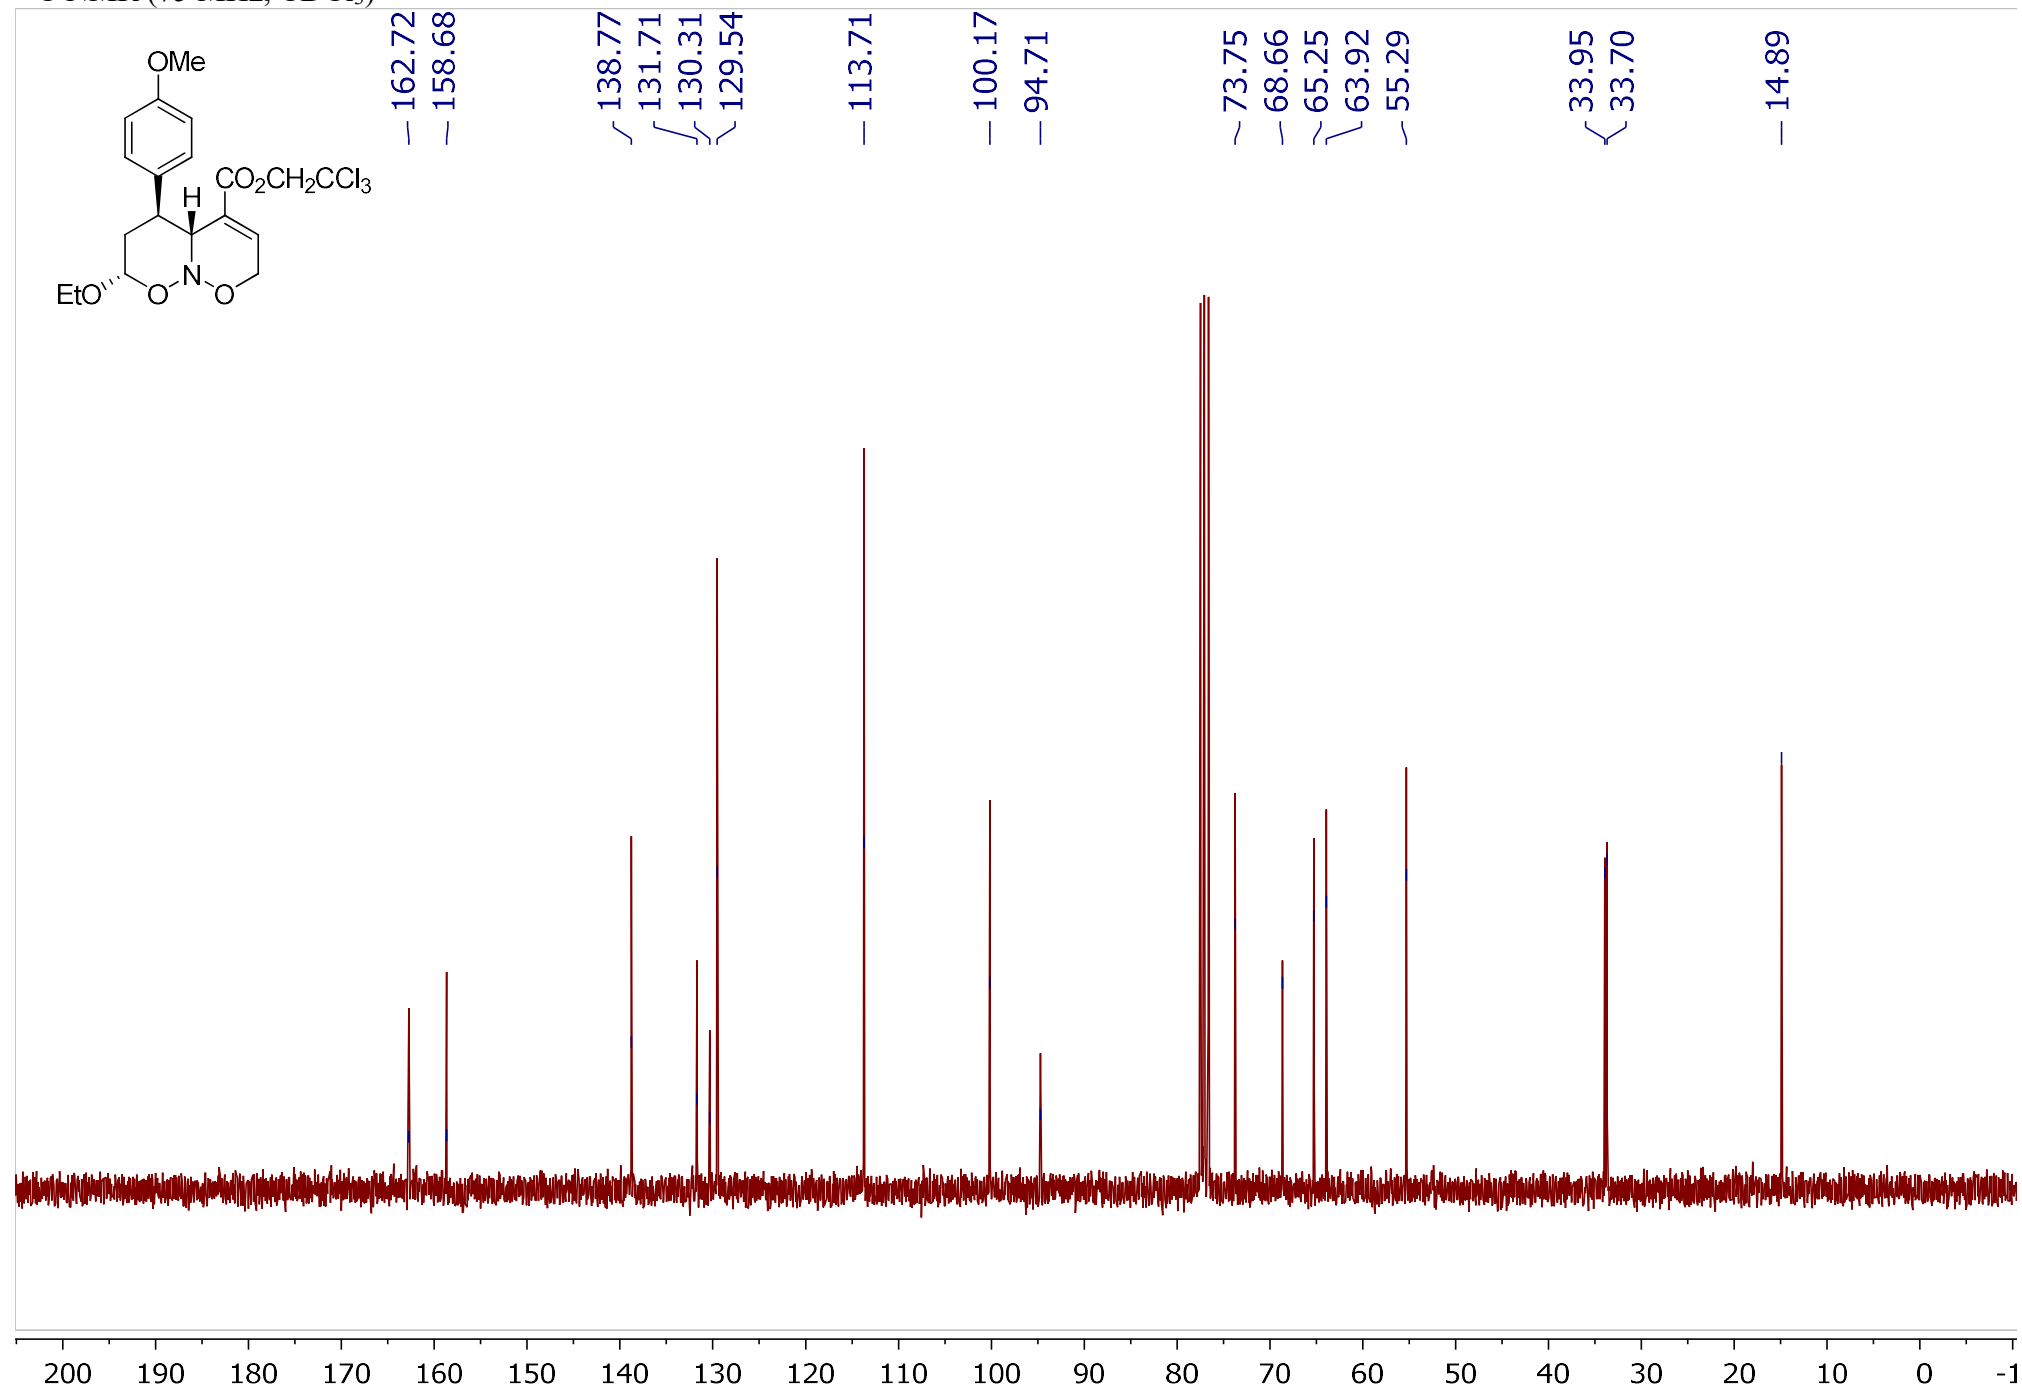

<sup>13</sup>C DEPT 135 (75 MHz, CDCl<sub>3</sub>)

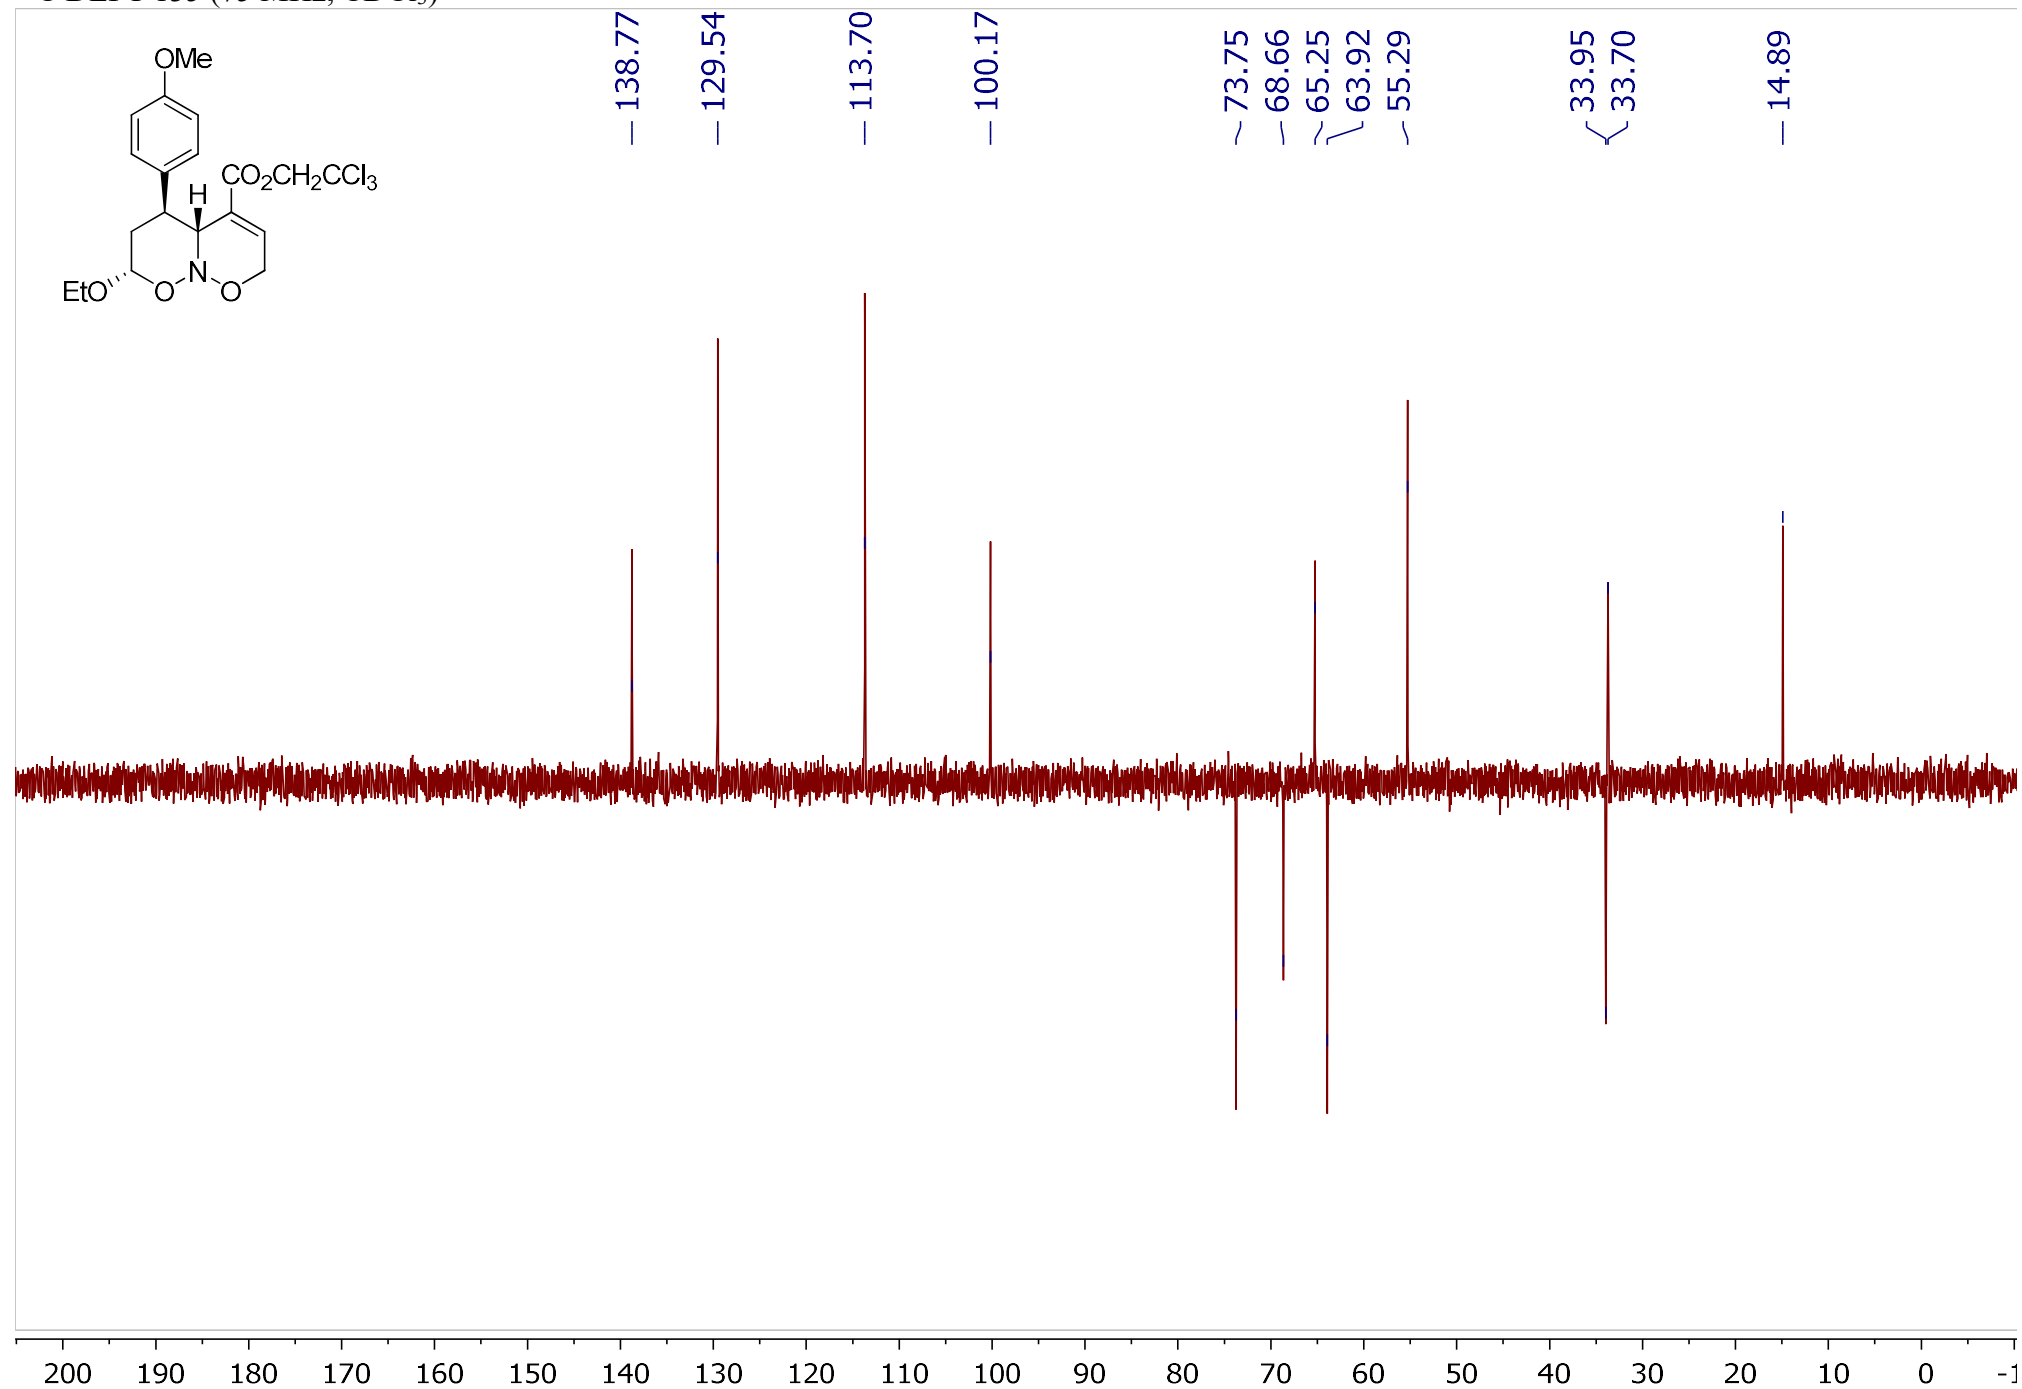

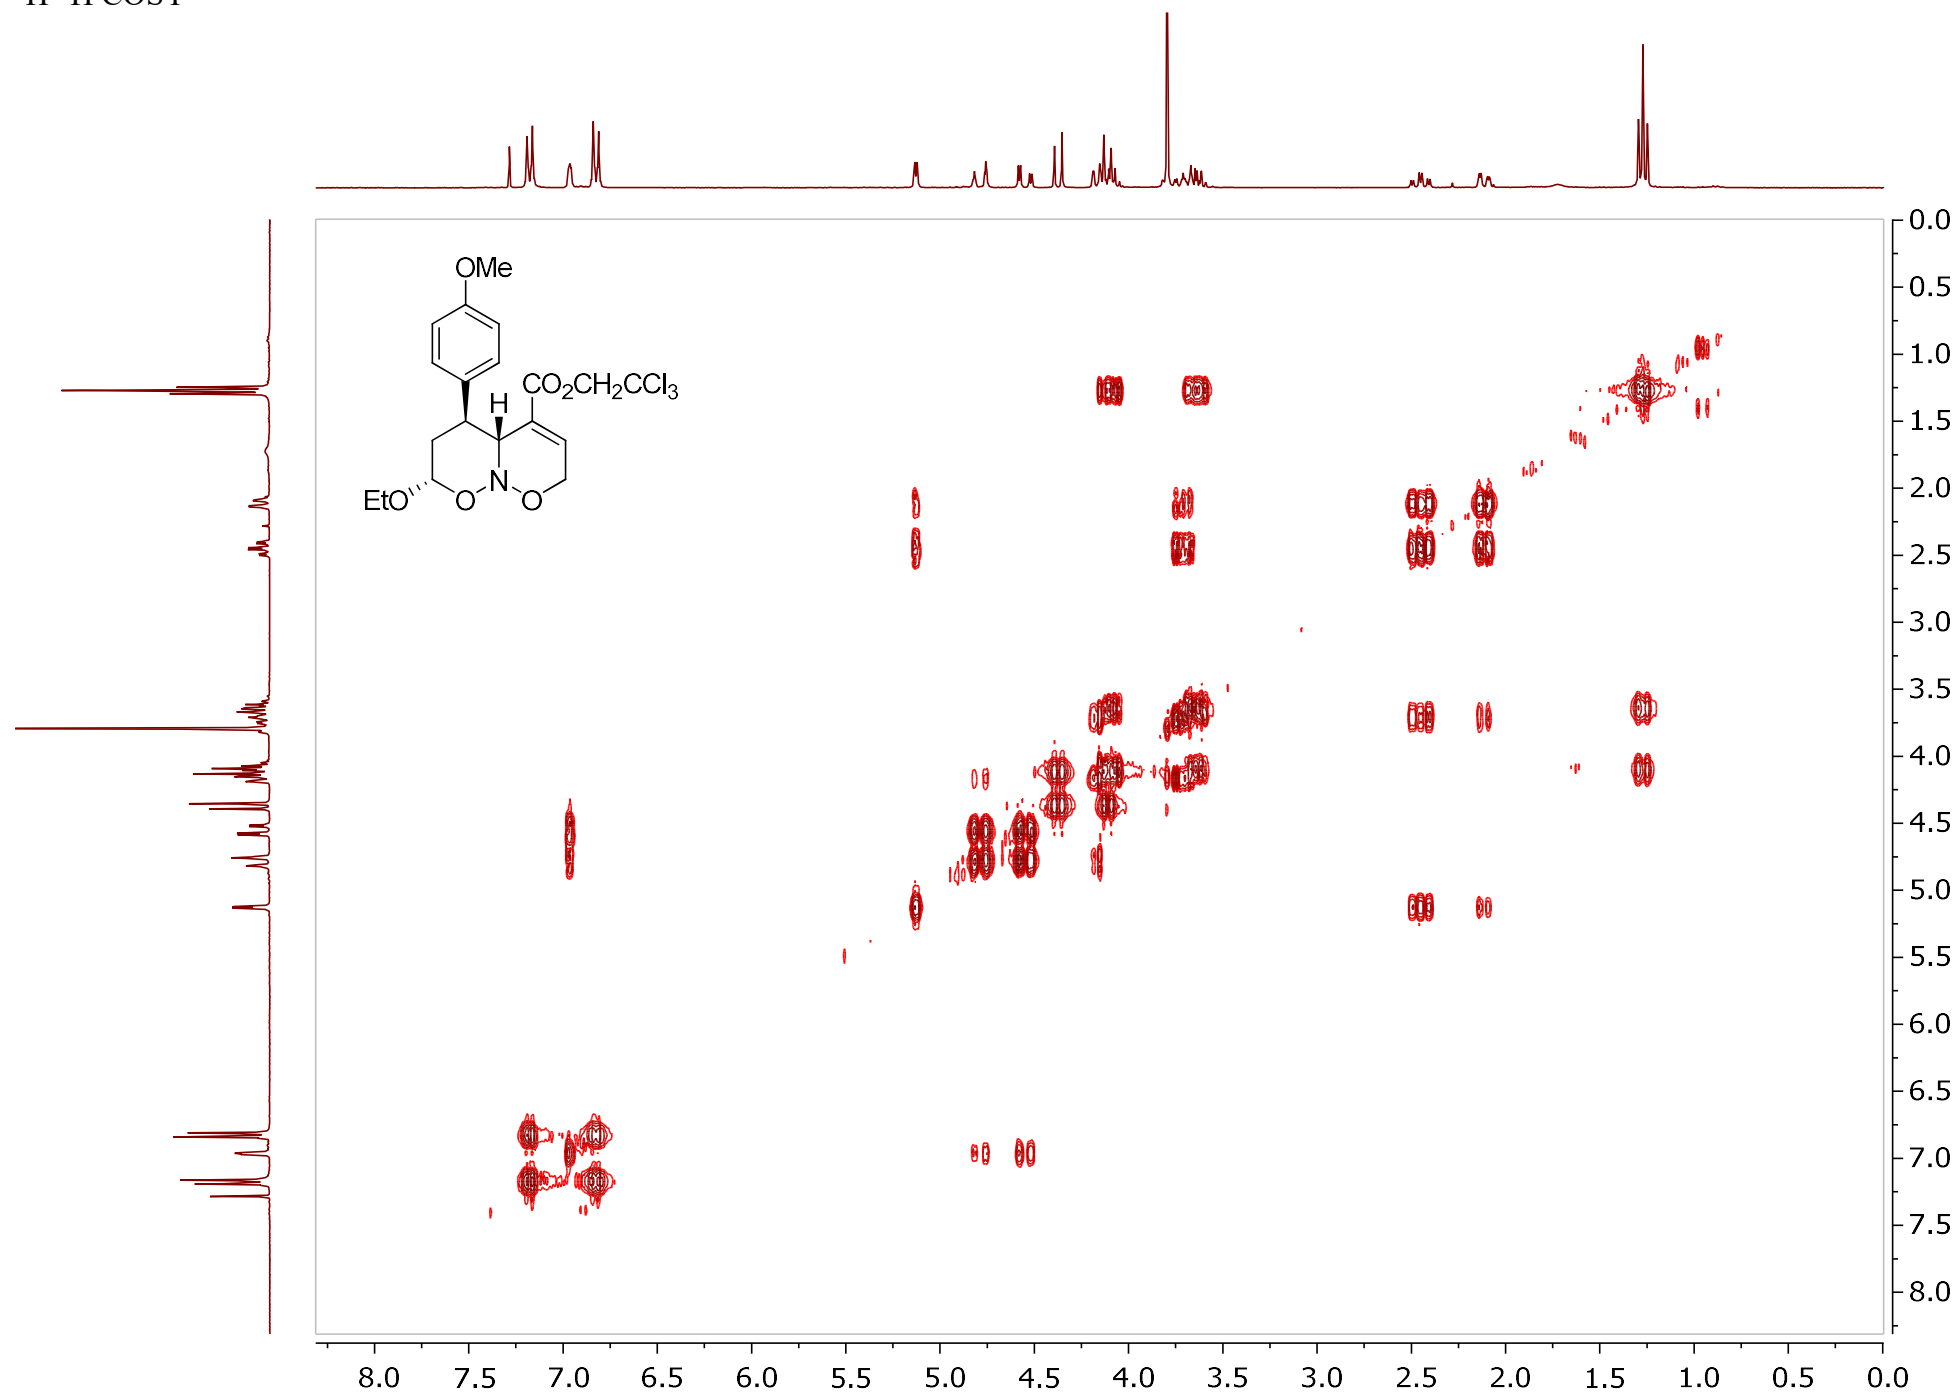

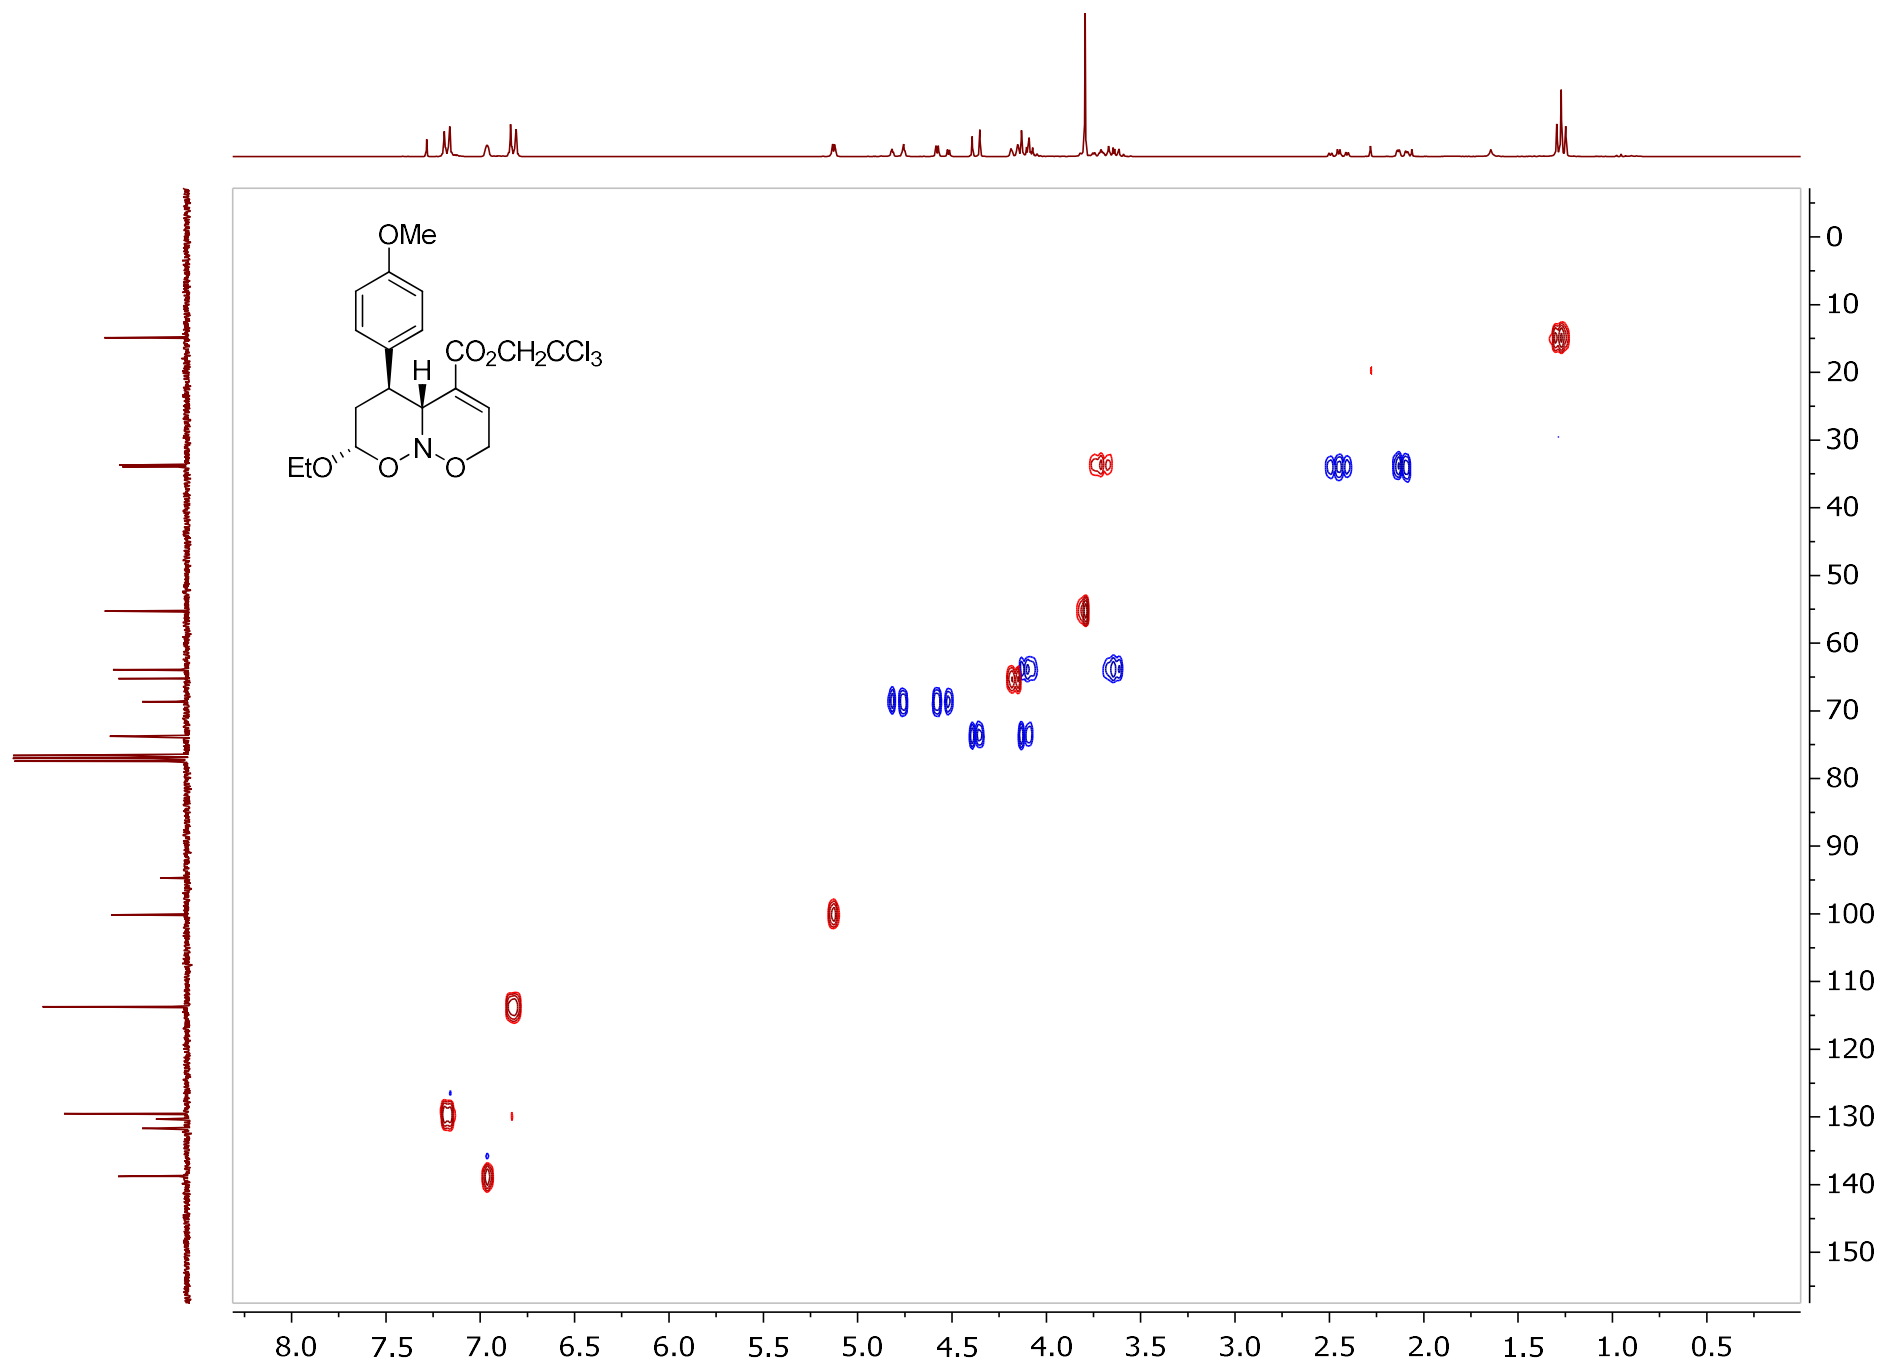

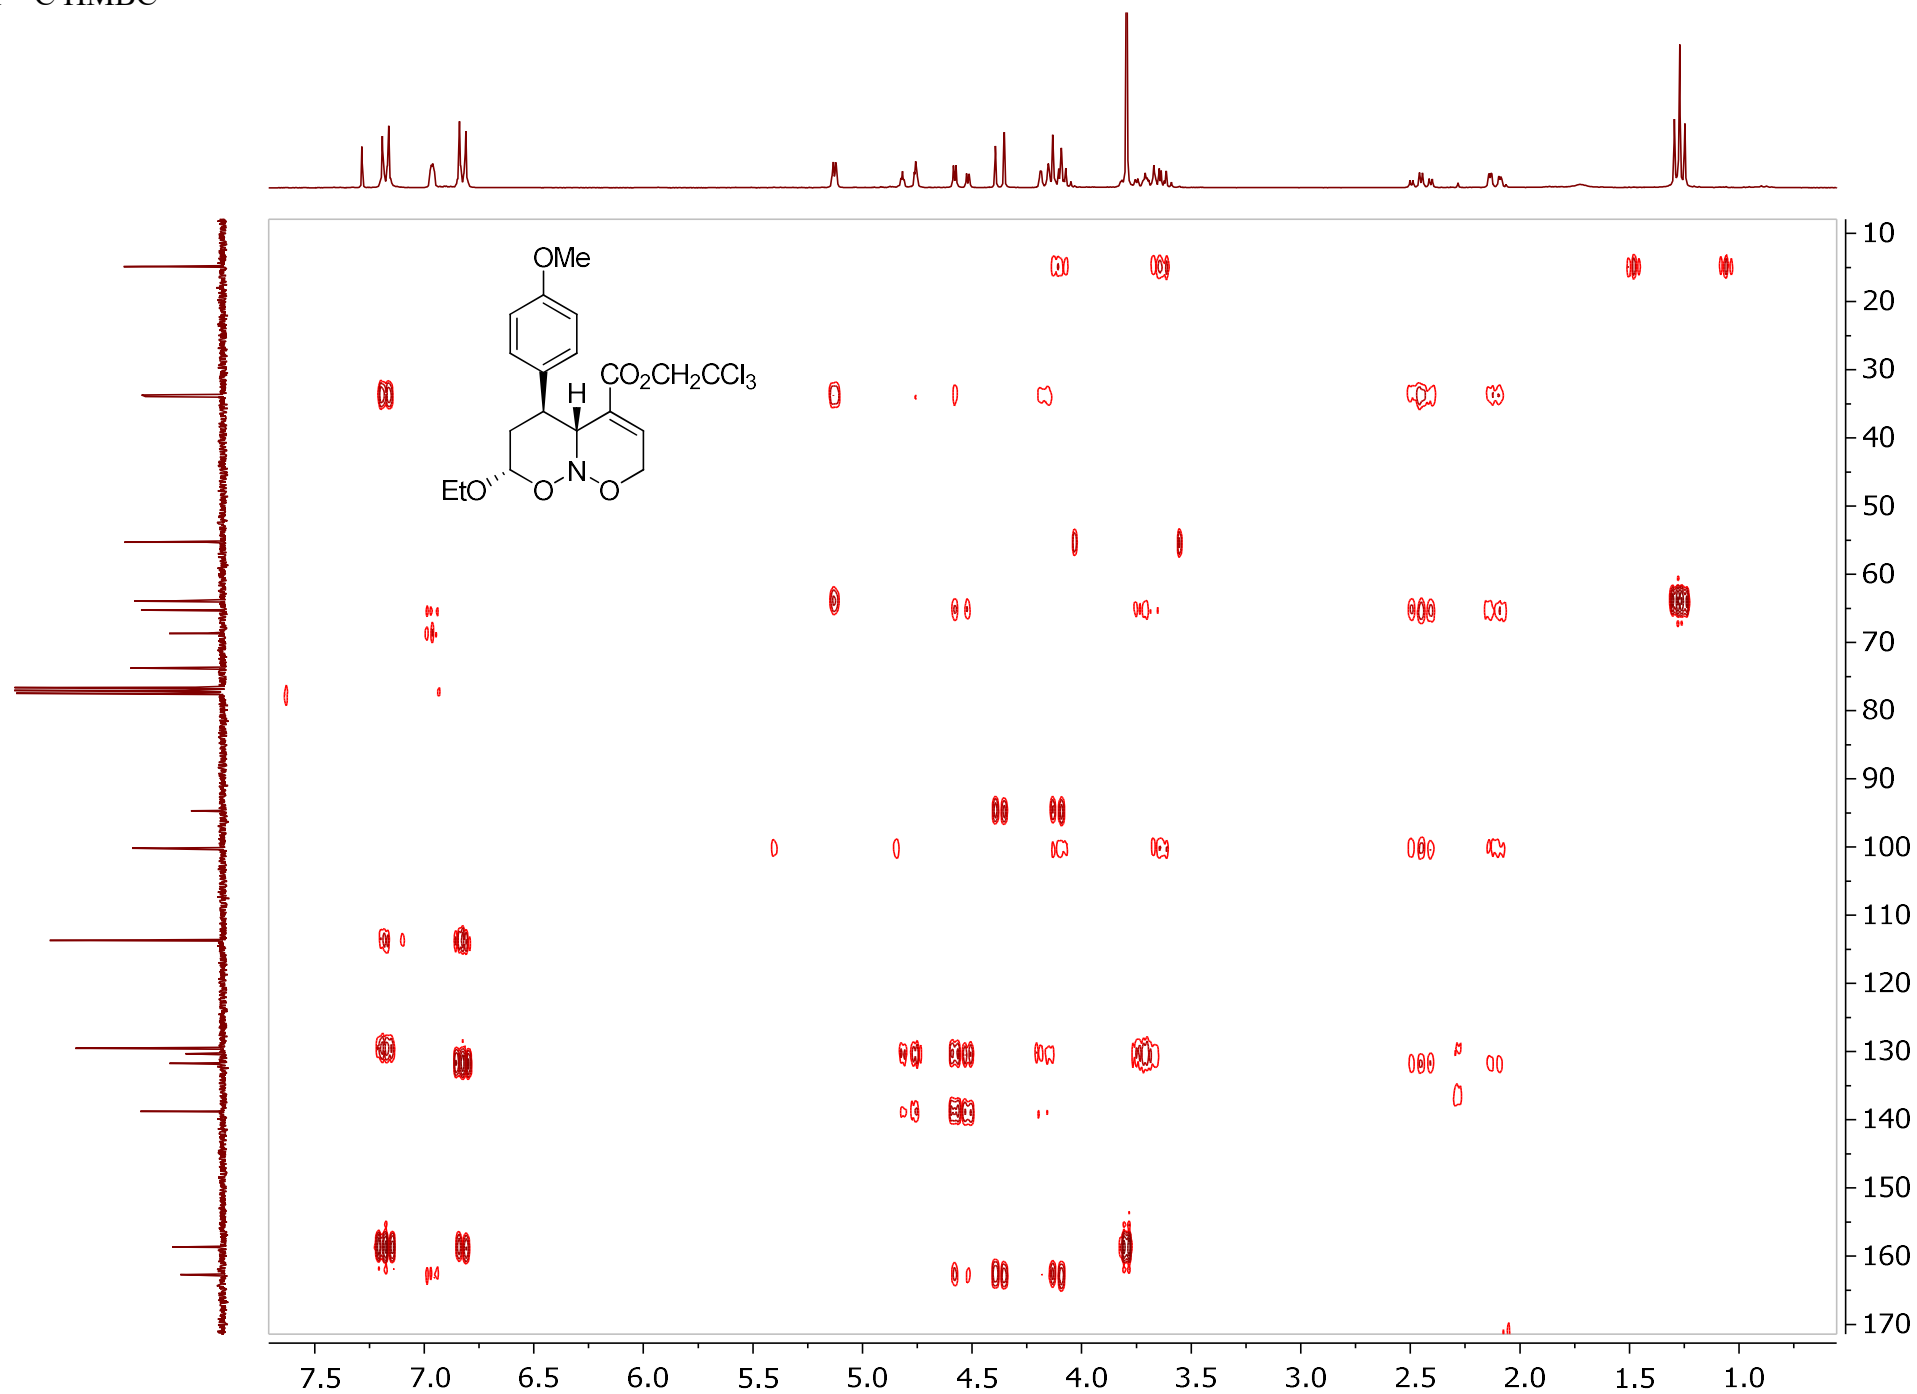

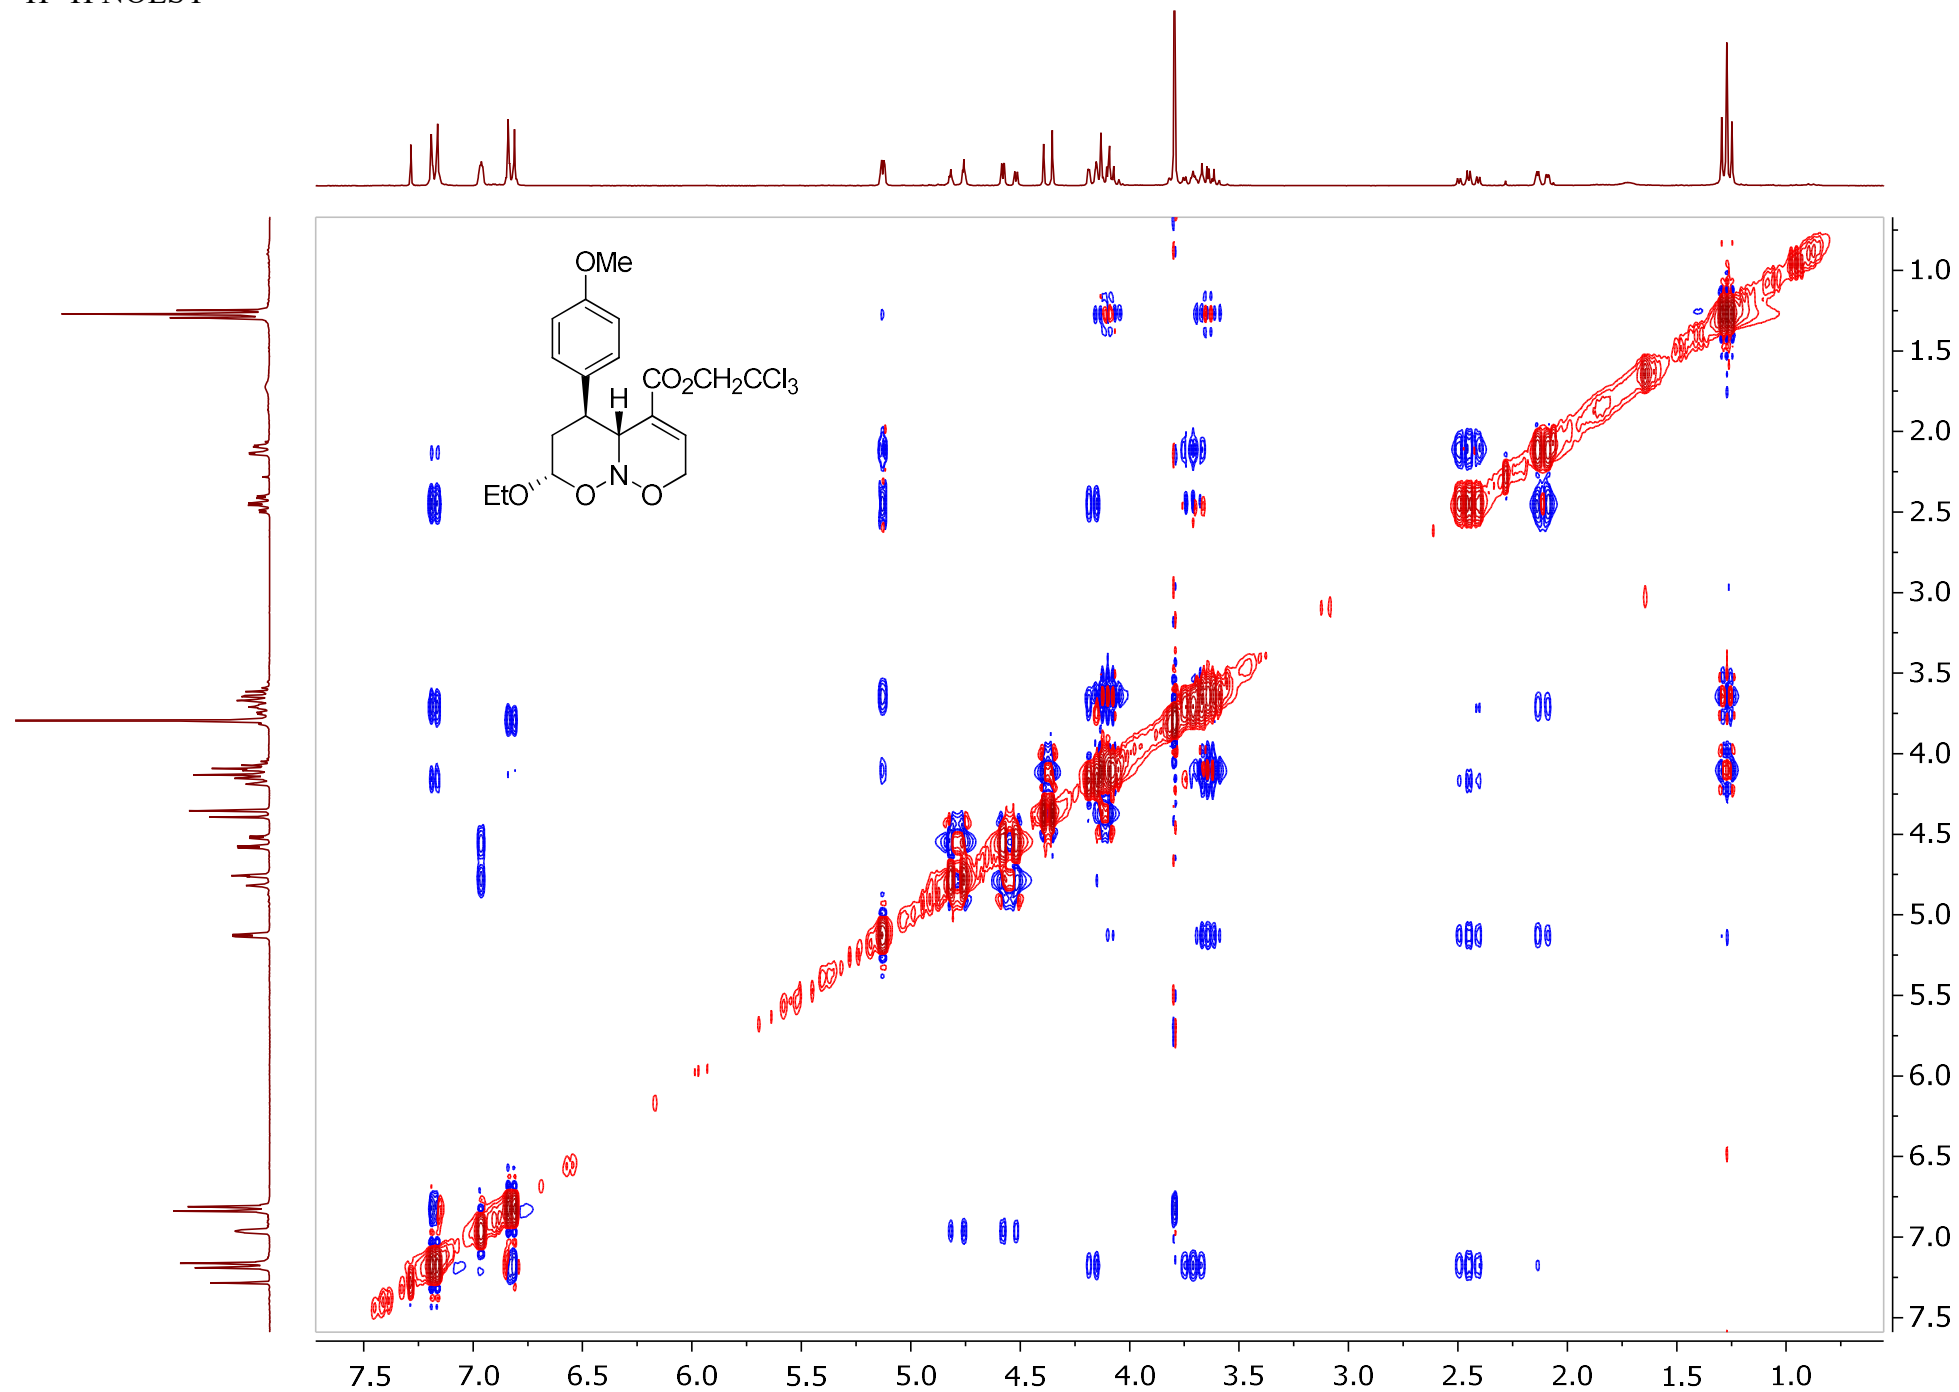

**2,2,2-Trichloroethyl (4aR\*,5S\*,5aR\*,9aR\*)-5-(4-chlorophenyl)-4a,5,5a,6,7,8,9,9a-octahydro-2H-benzo[e][1,2]oxazino[2,3-b][1,2]oxazine-4-carboxylate 3p**

<sup>1</sup>H NMR (300 MHz, CDCl<sub>3</sub>, 320 K)

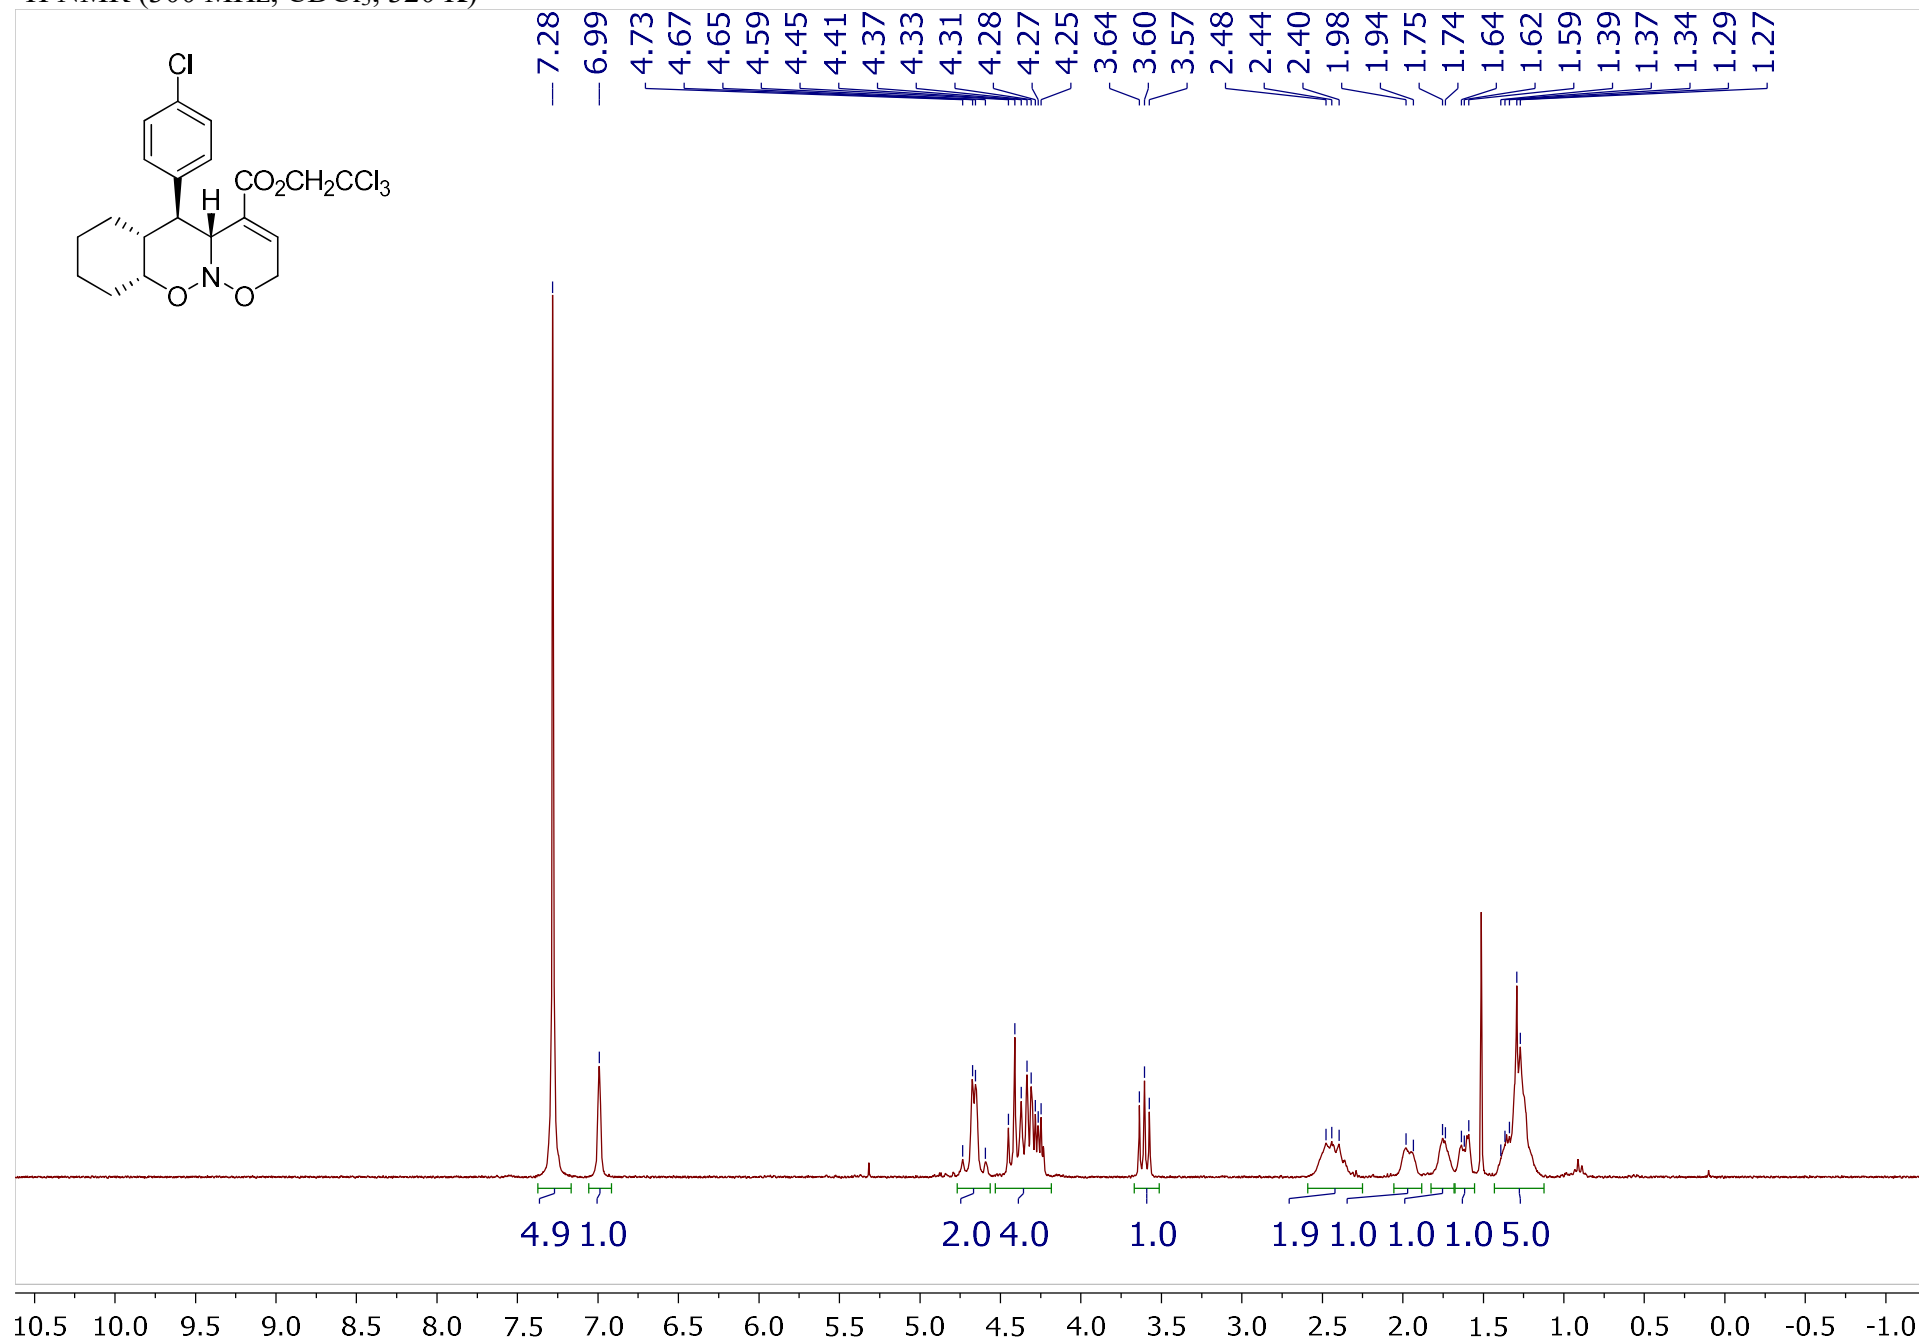



$^{13}\text{C}$  NMR (75 MHz,  $\text{CDCl}_3$ , 320 K)

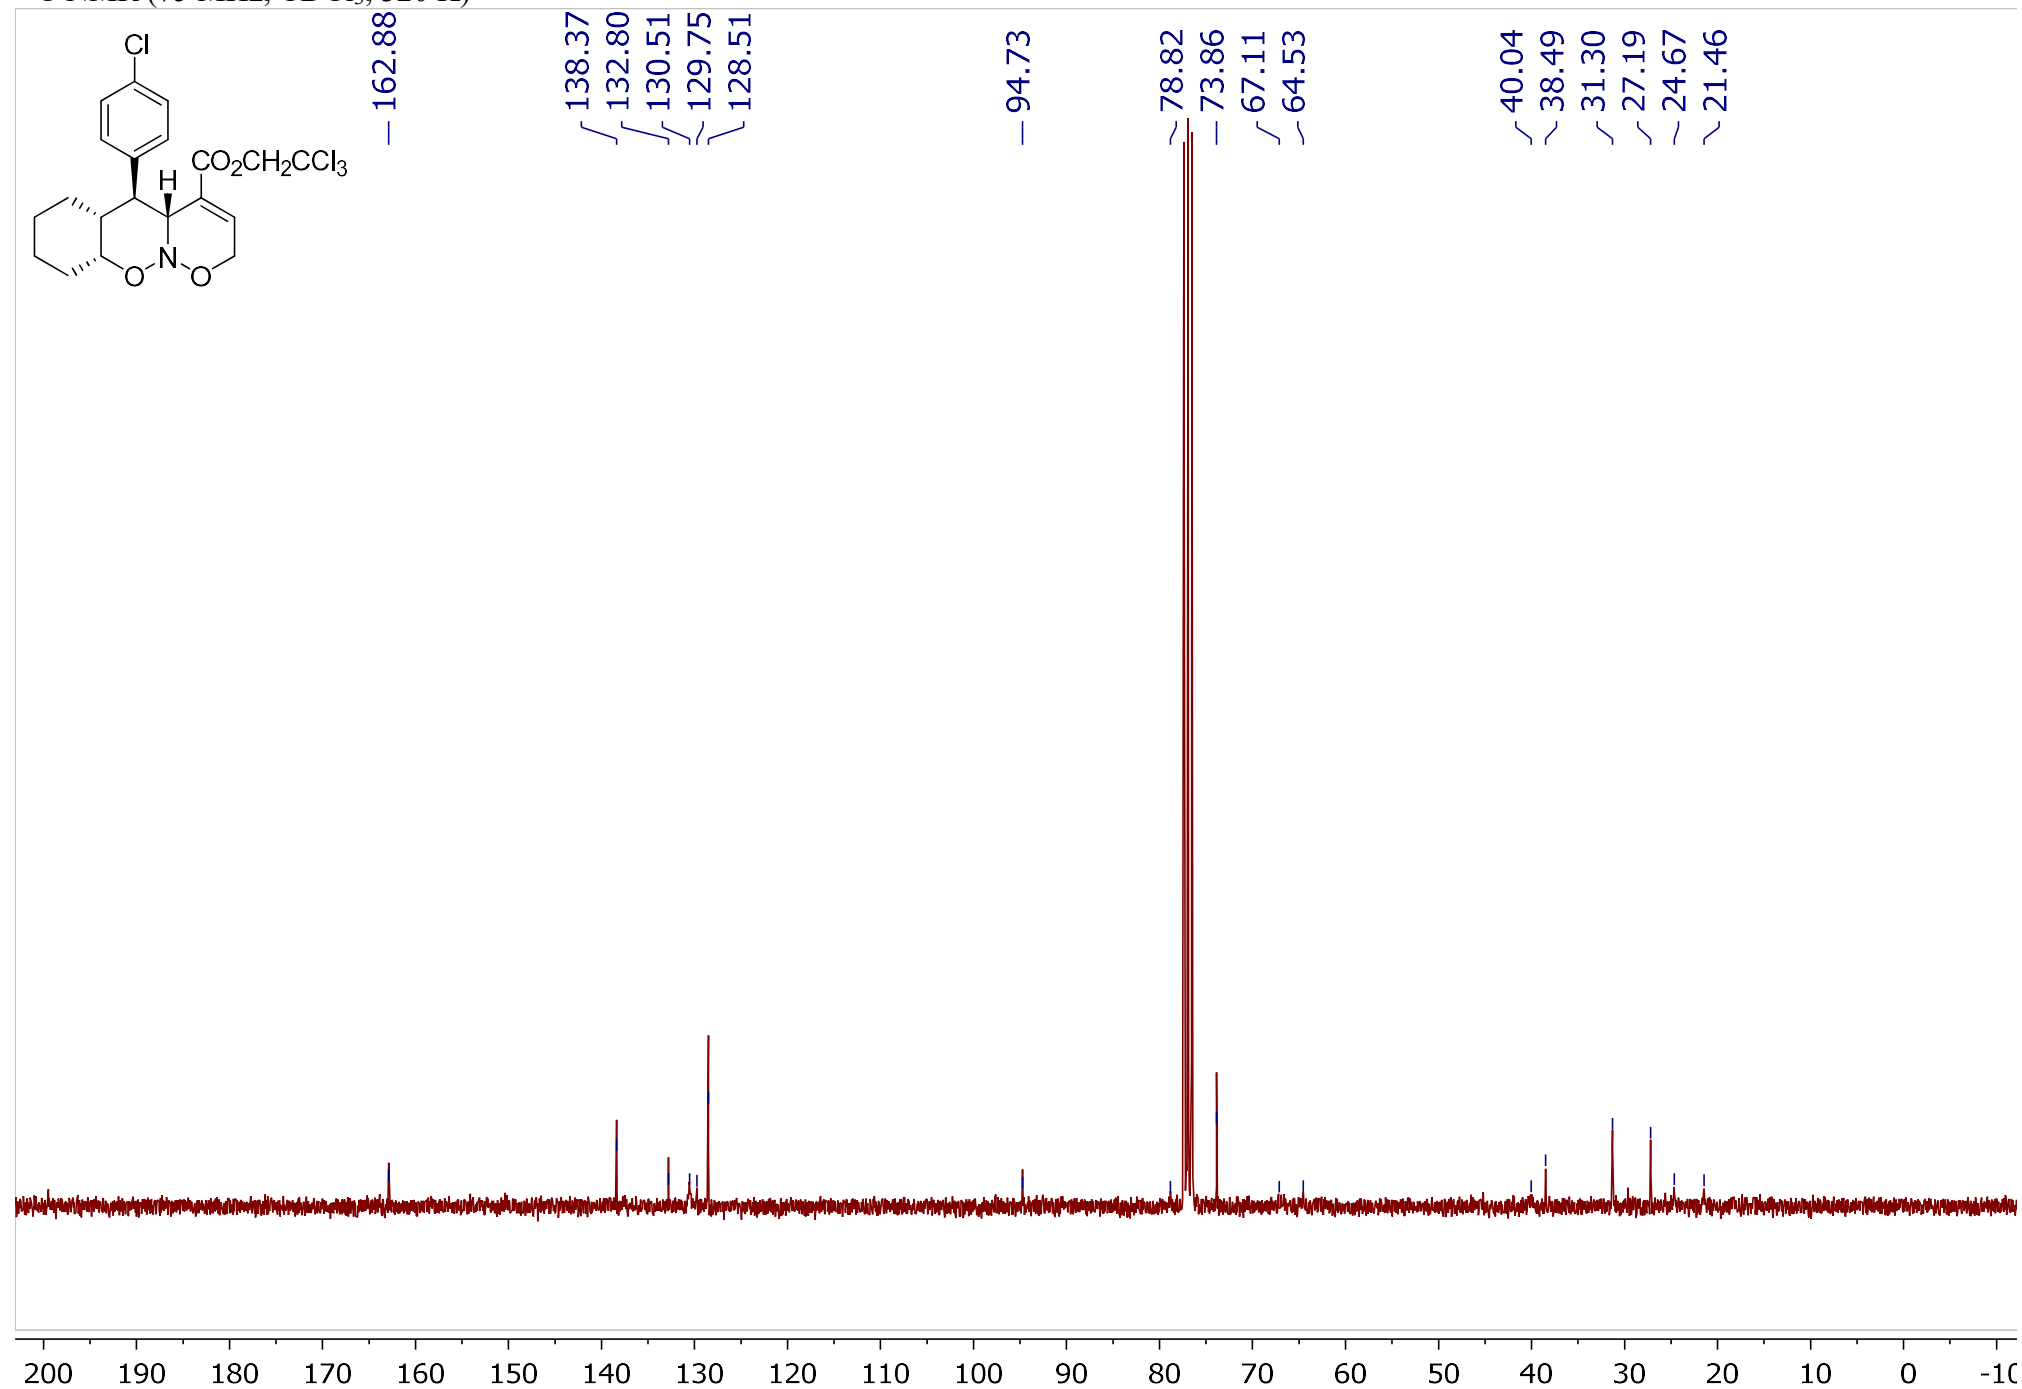

$^1\text{H}$ - $^1\text{H}$  COSY

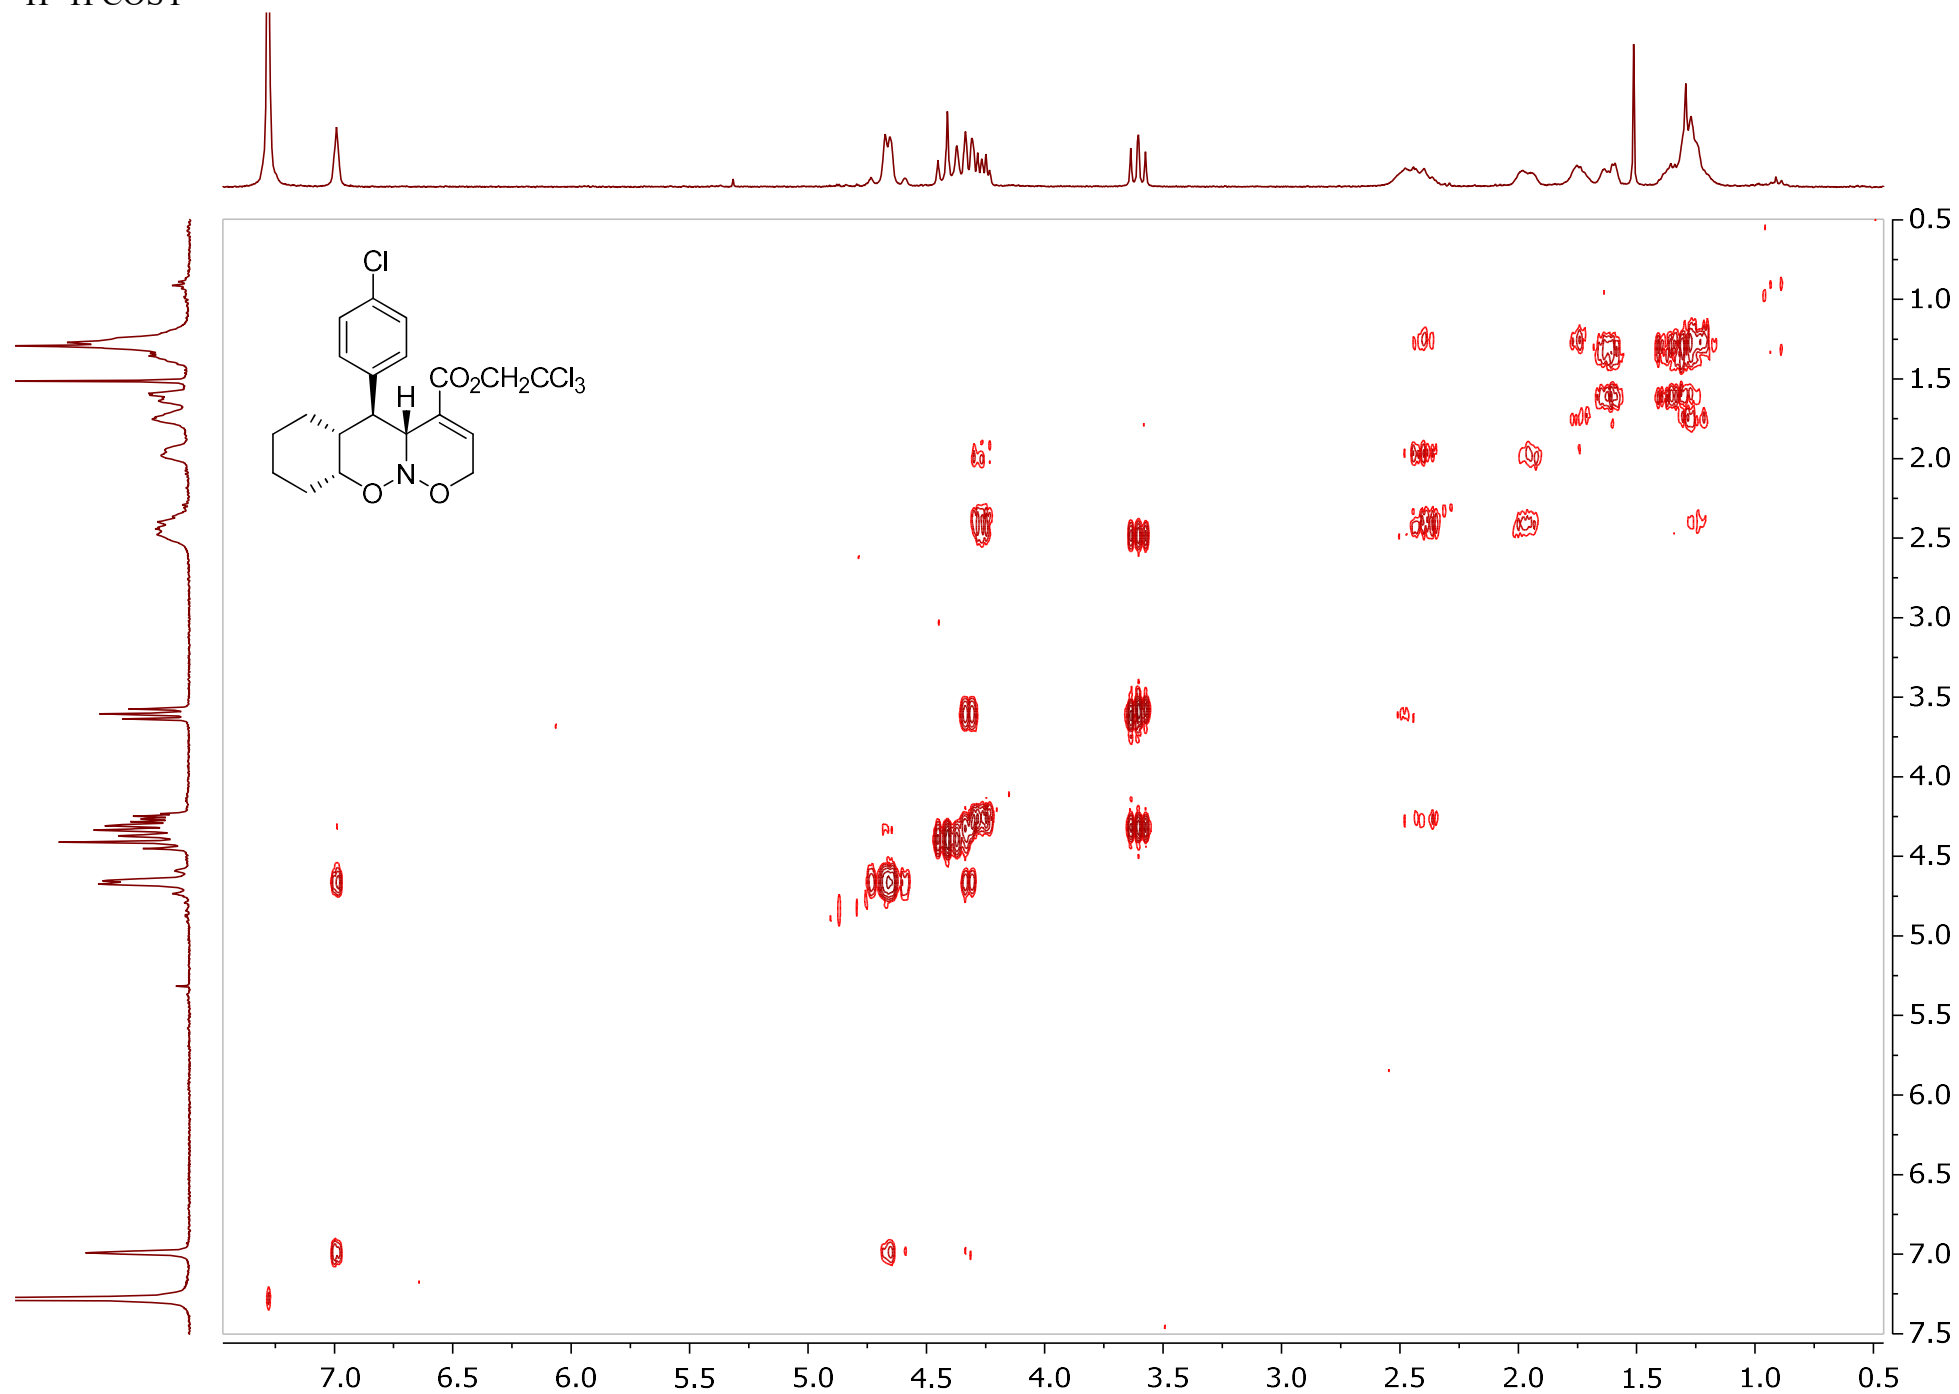

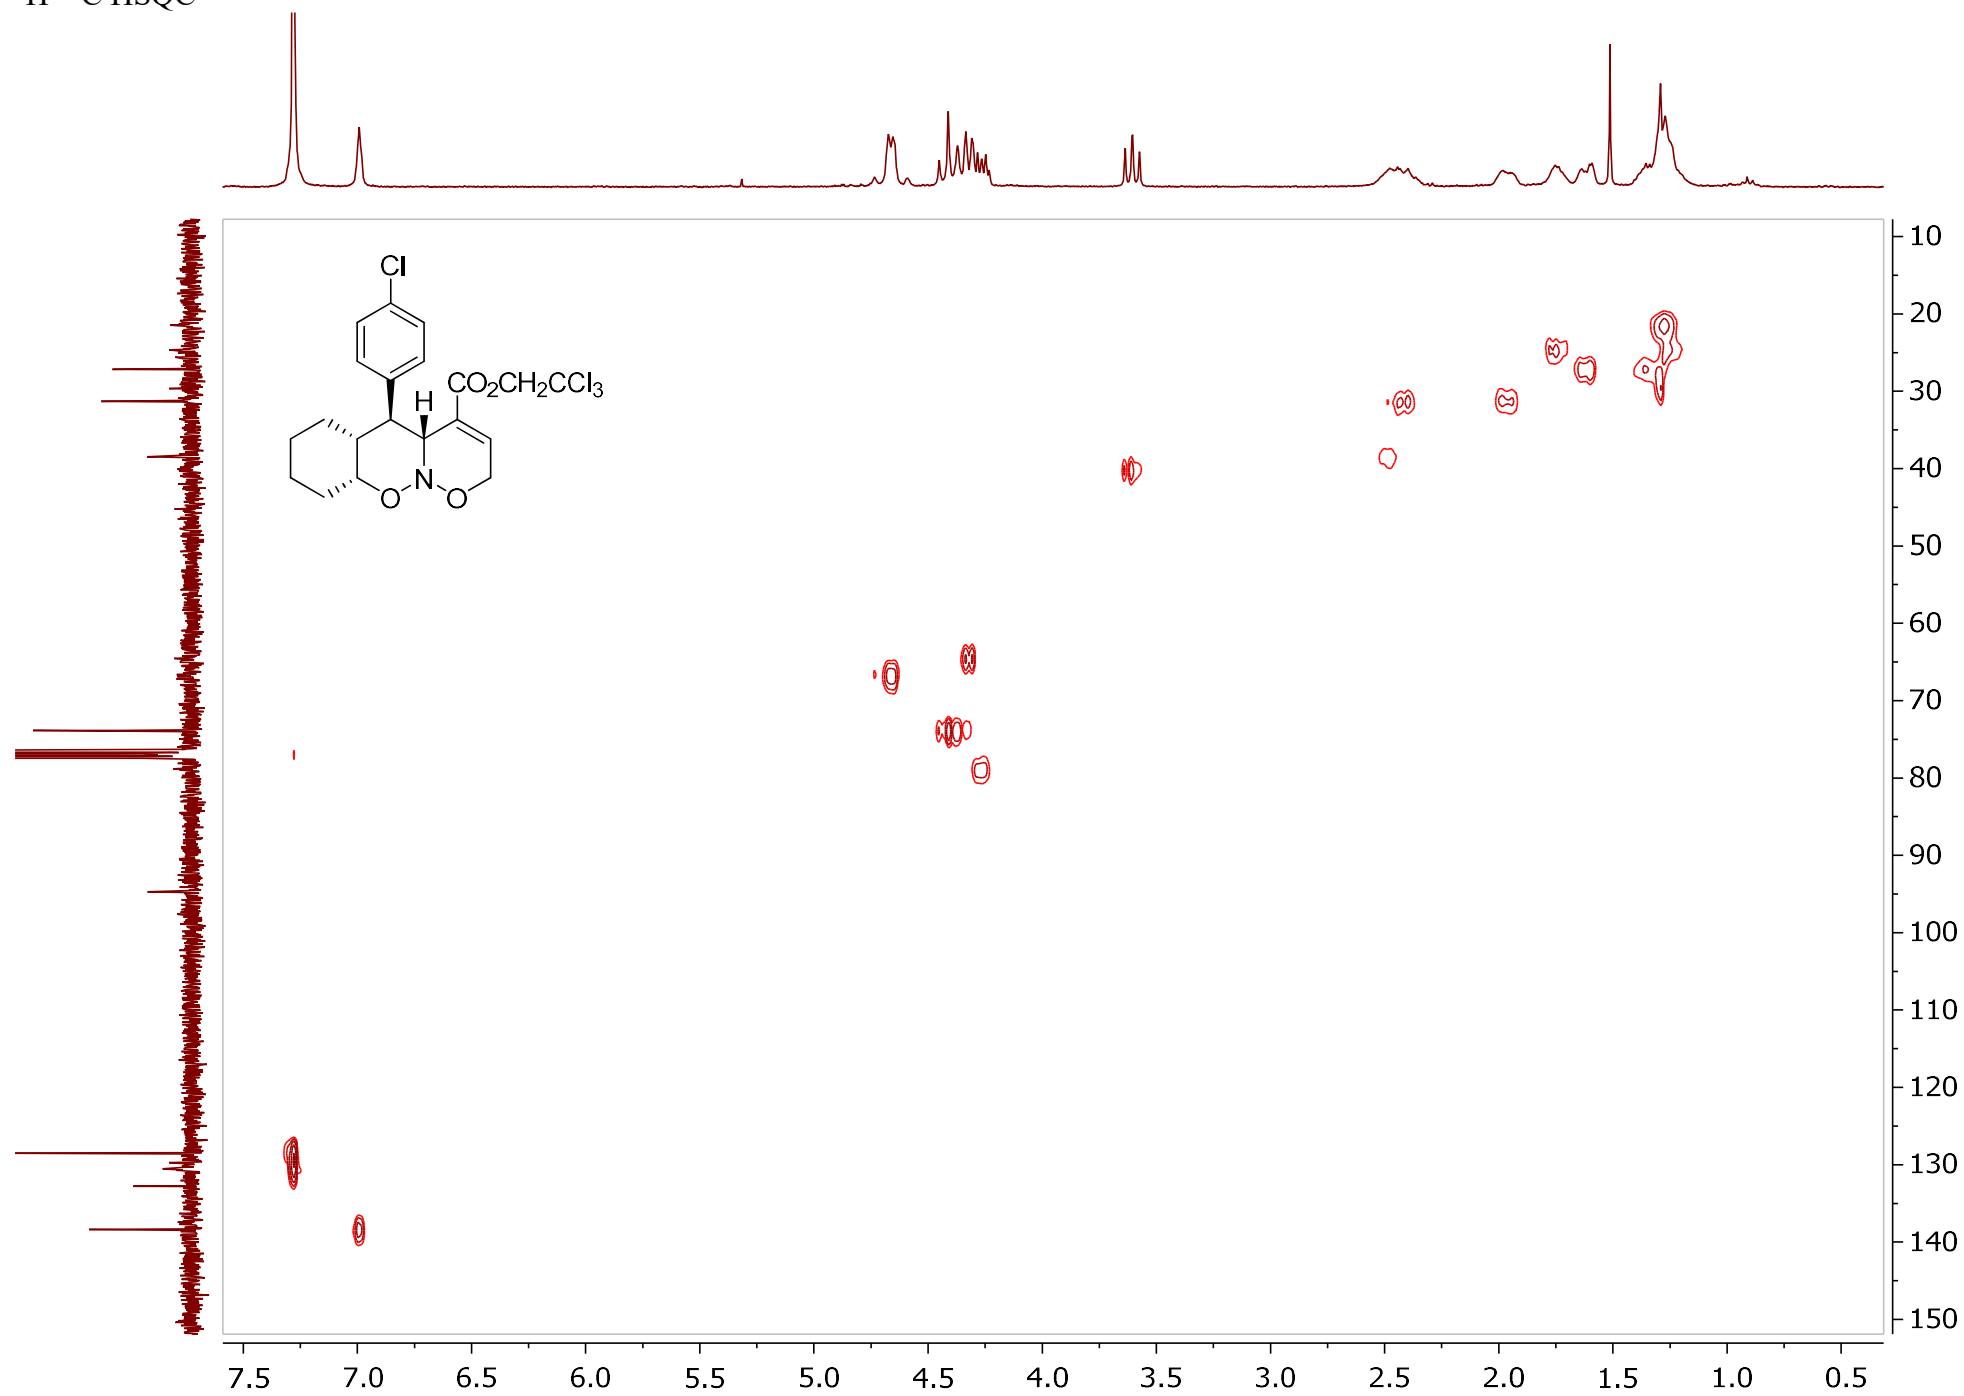

**2,2,2-Trichloroethyl 4-(4-methoxyphenyl)-2,2-dimethyl-3,4-dihydro-2H-pyrrolo[1,2-b][1,2]oxazine-5-carboxylate 4a**

$^1\text{H}$  NMR (300 MHz,  $\text{CDCl}_3$ )

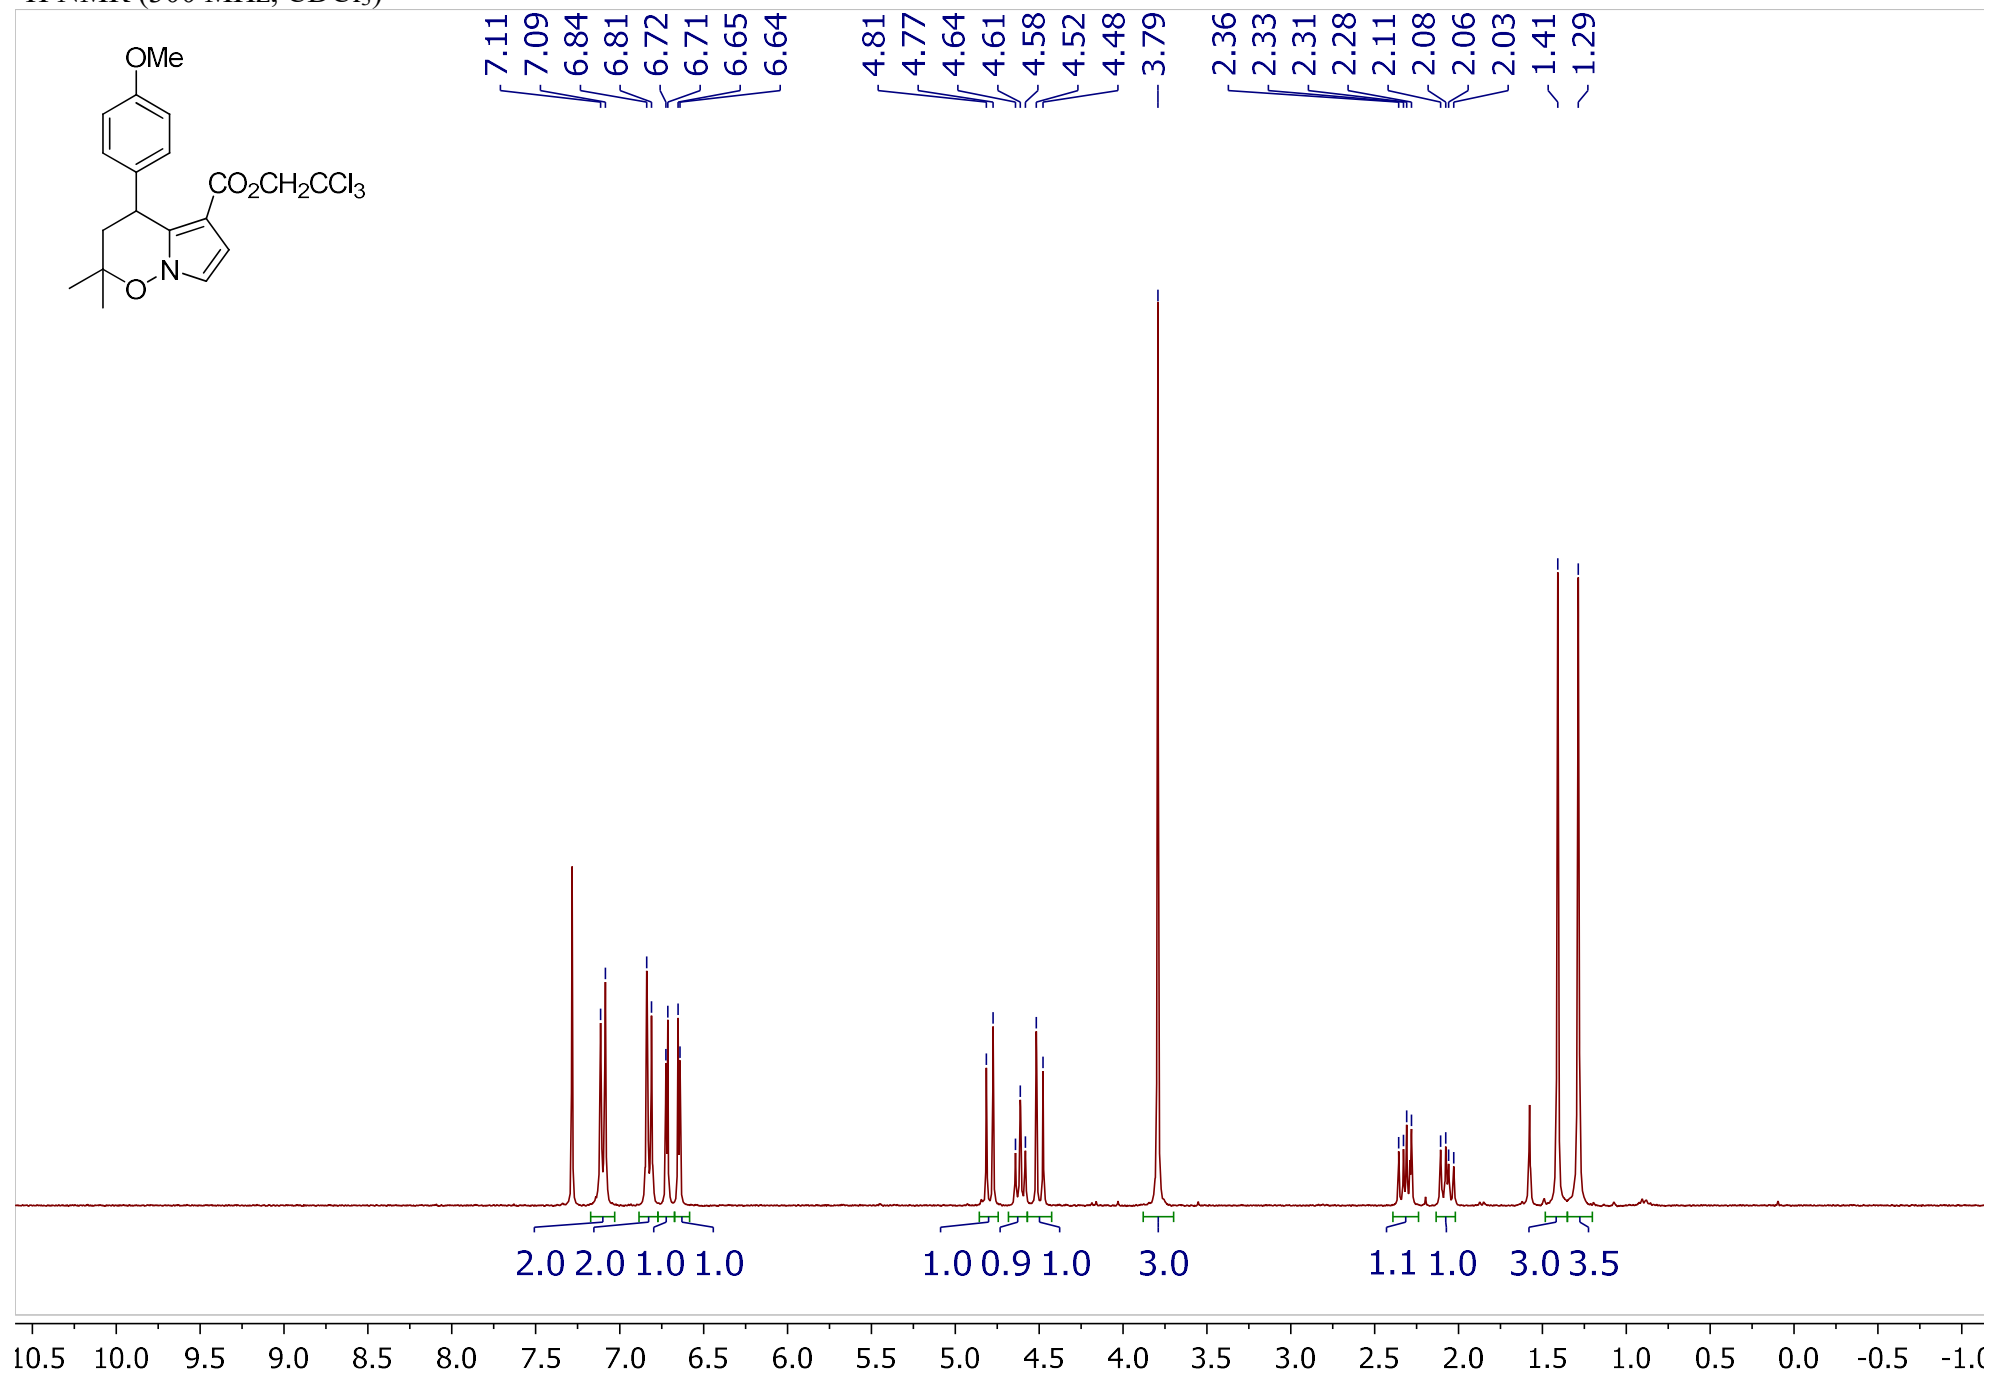

<sup>13</sup>C NMR (75 MHz, CDCl<sub>3</sub>)

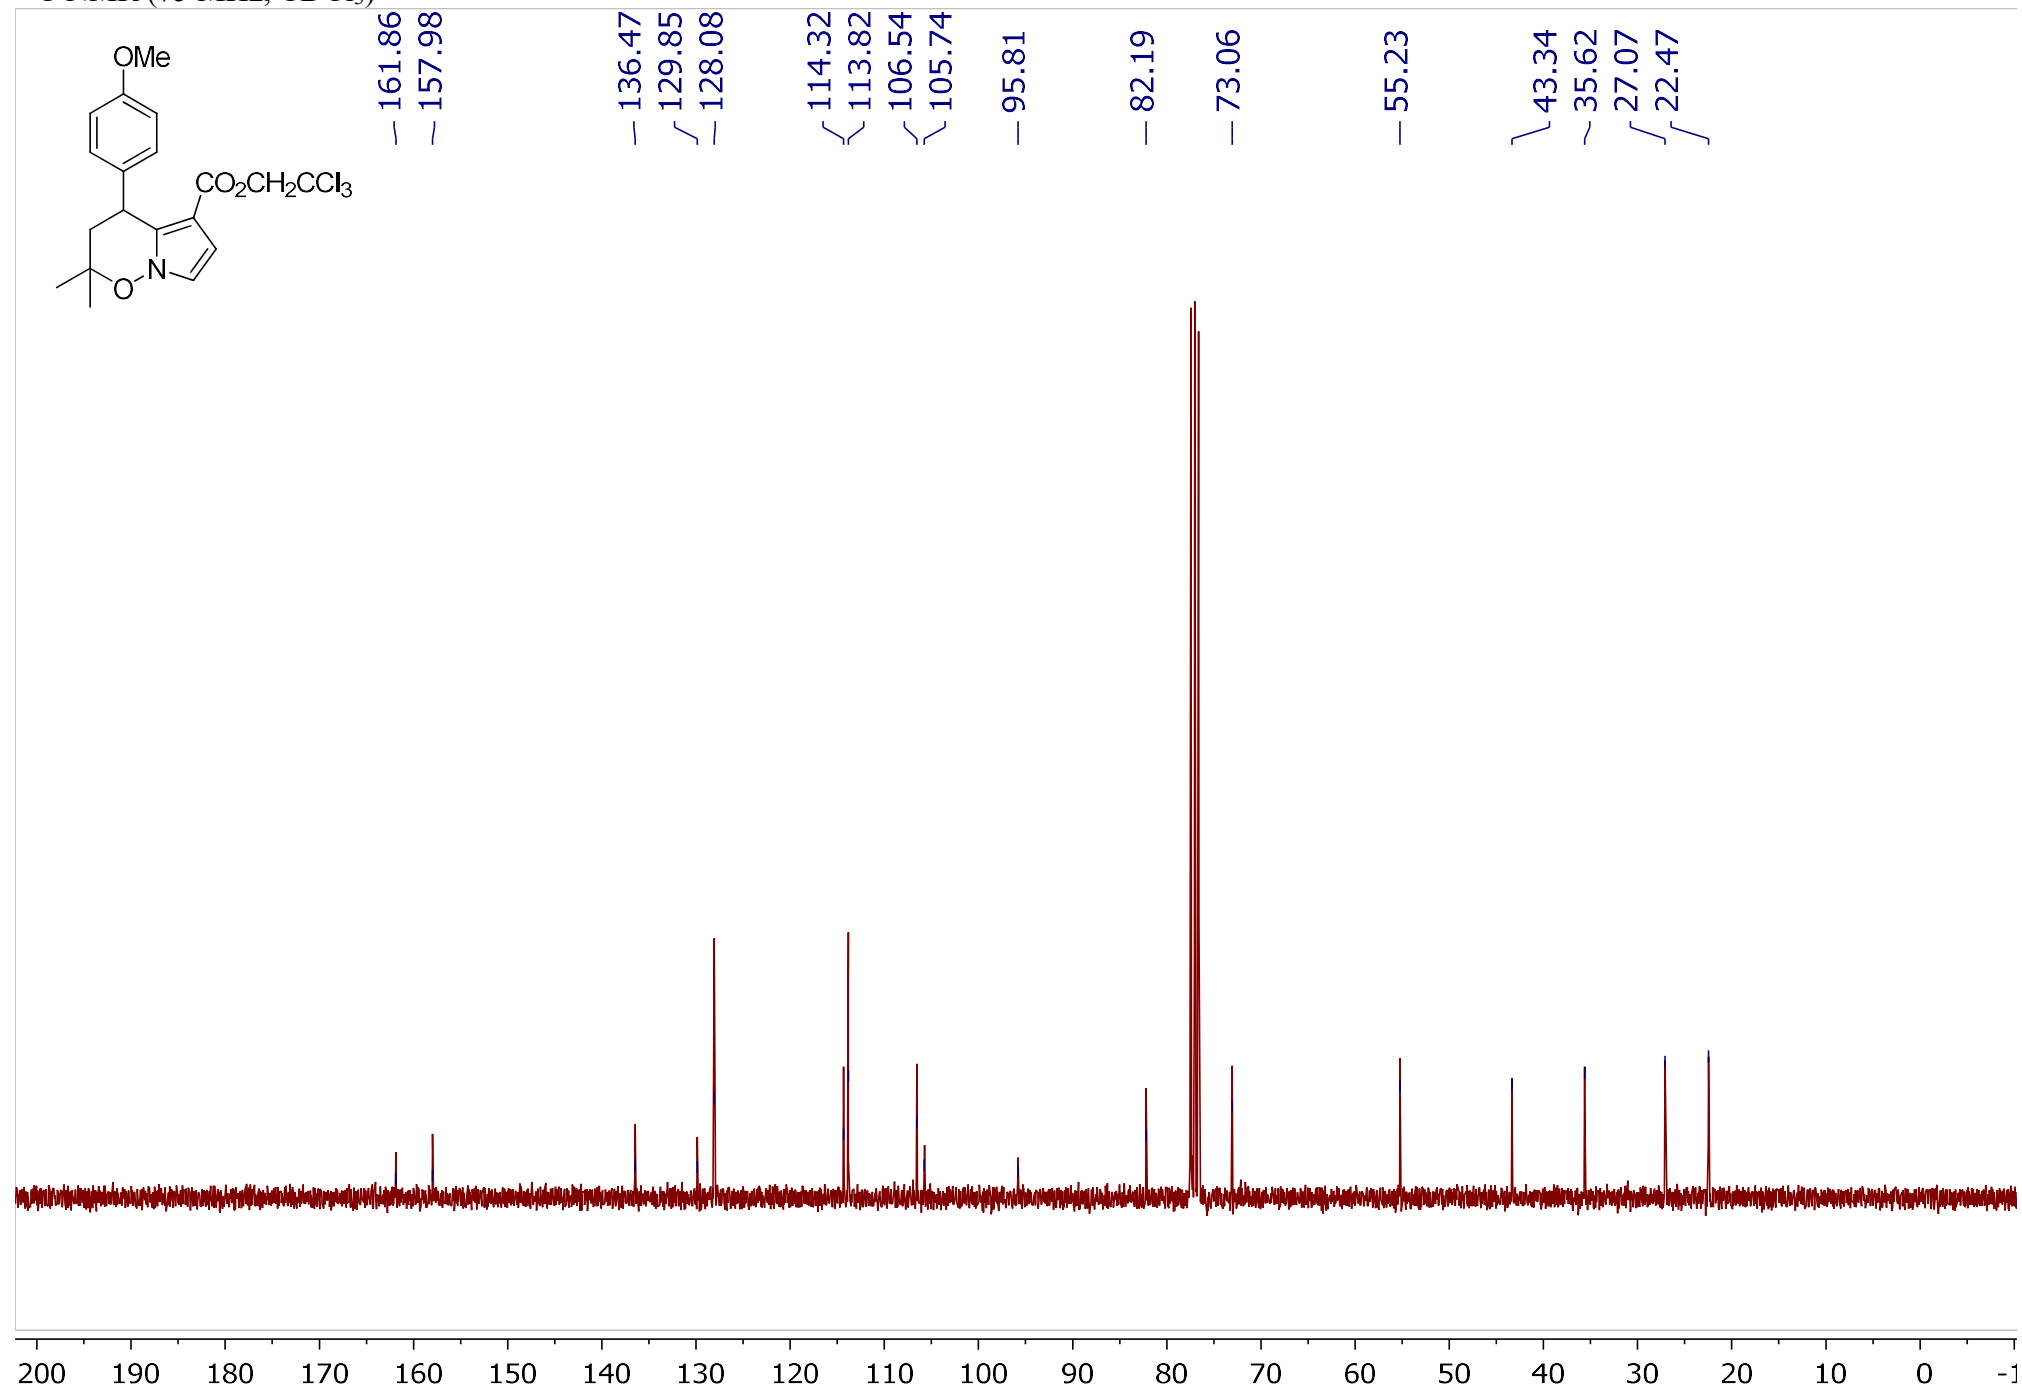

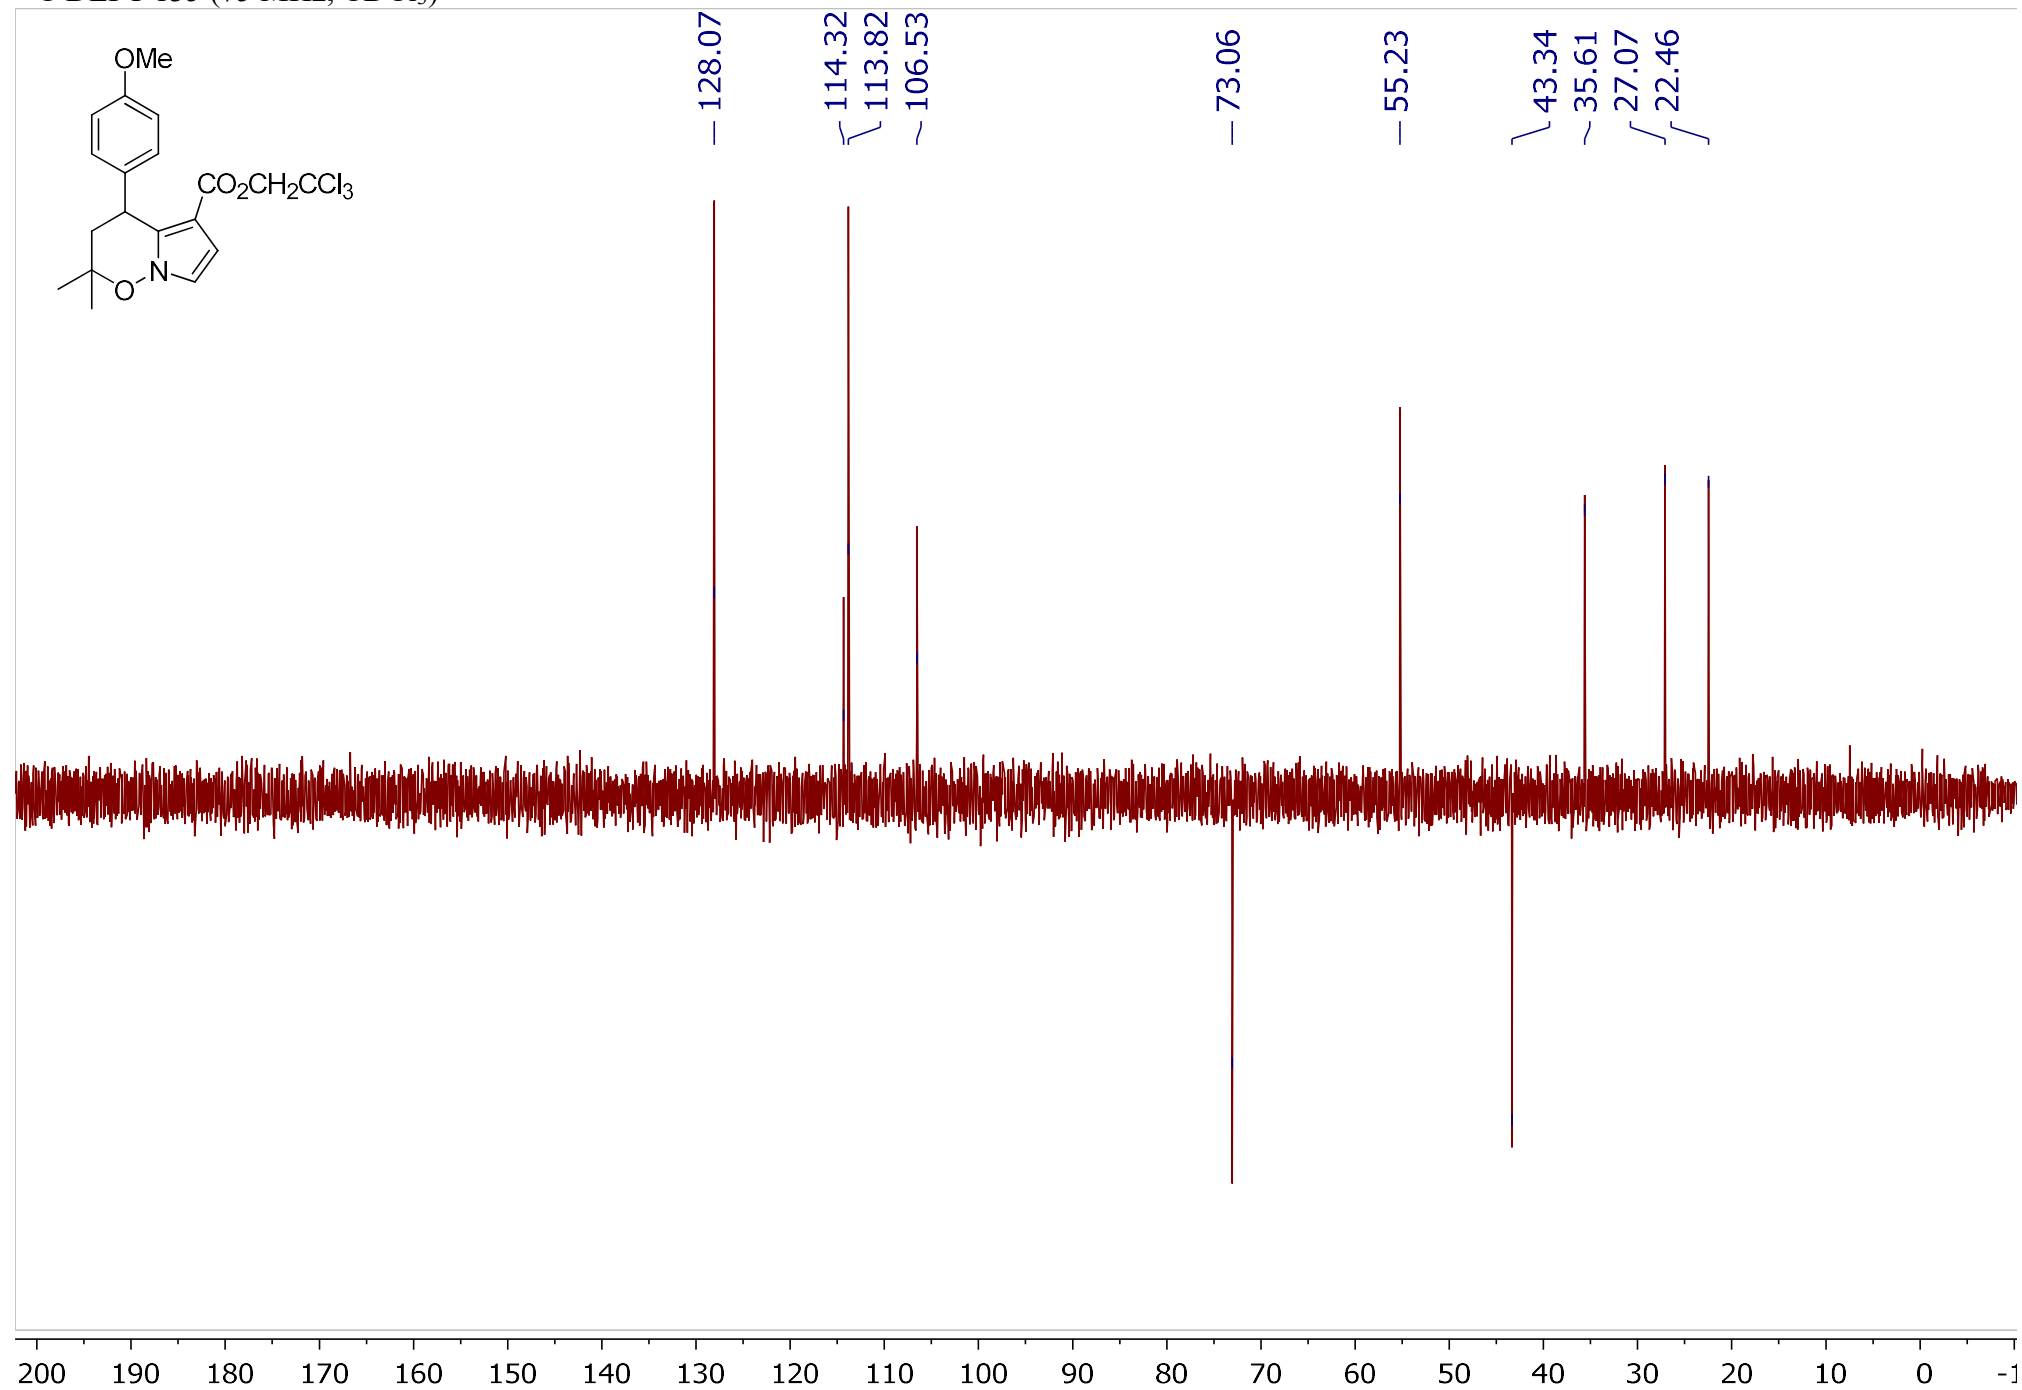

**2,2,2-Trichloroethyl 4-(4-chloroxyphenyl)-2,2-dimethyl-3,4-dihydro-2H-pyrrolo[1,2-b][1,2]oxazine-5-carboxylate 4g**

$^1\text{H}$  NMR (300 MHz,  $\text{CDCl}_3$ )

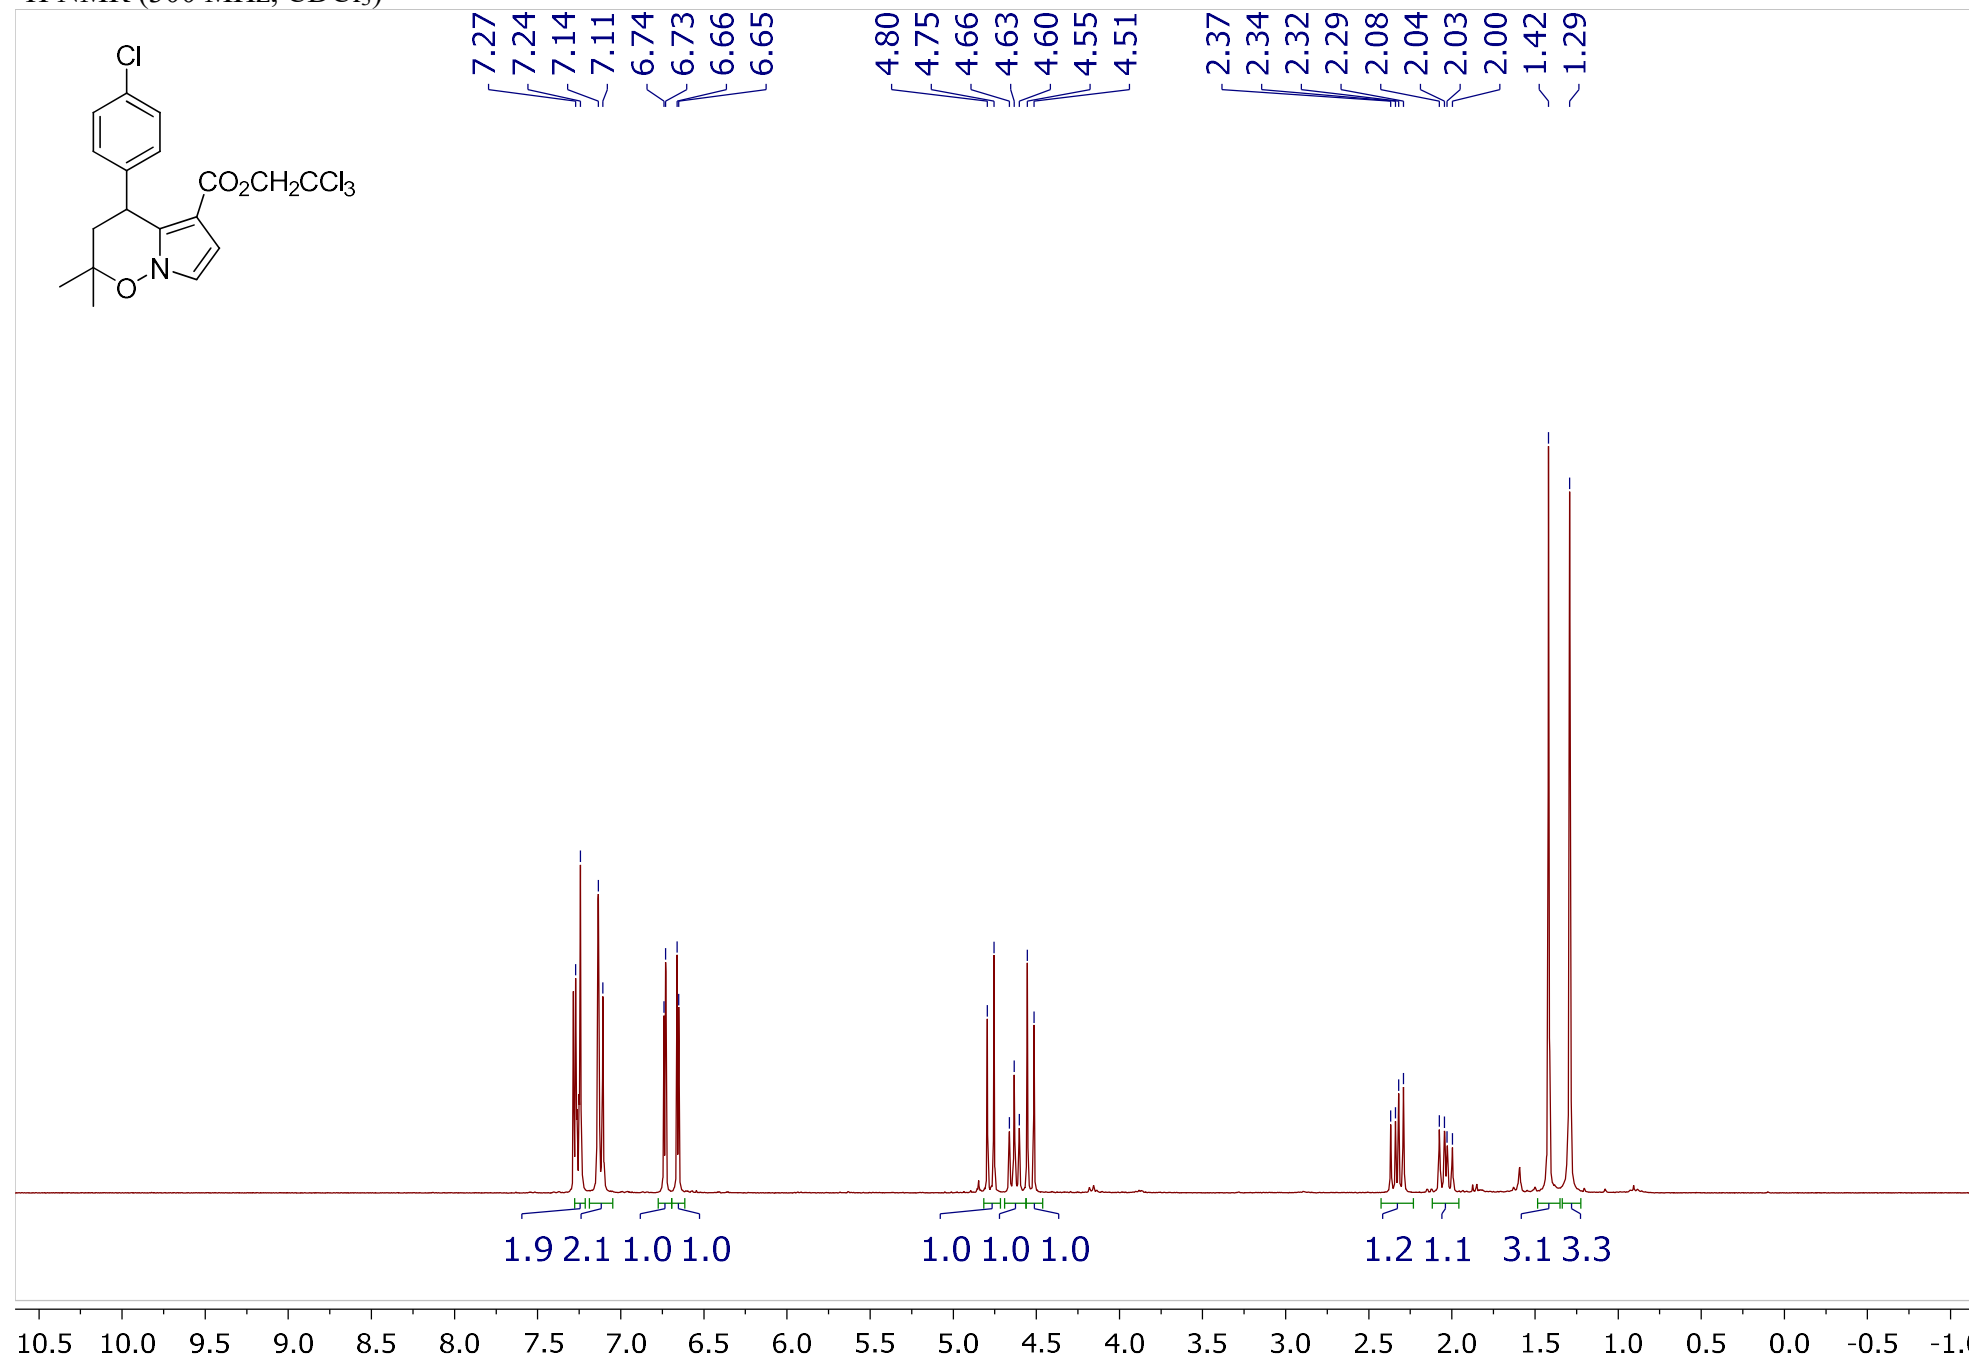

<sup>13</sup>C NMR (75 MHz, CDCl<sub>3</sub>)

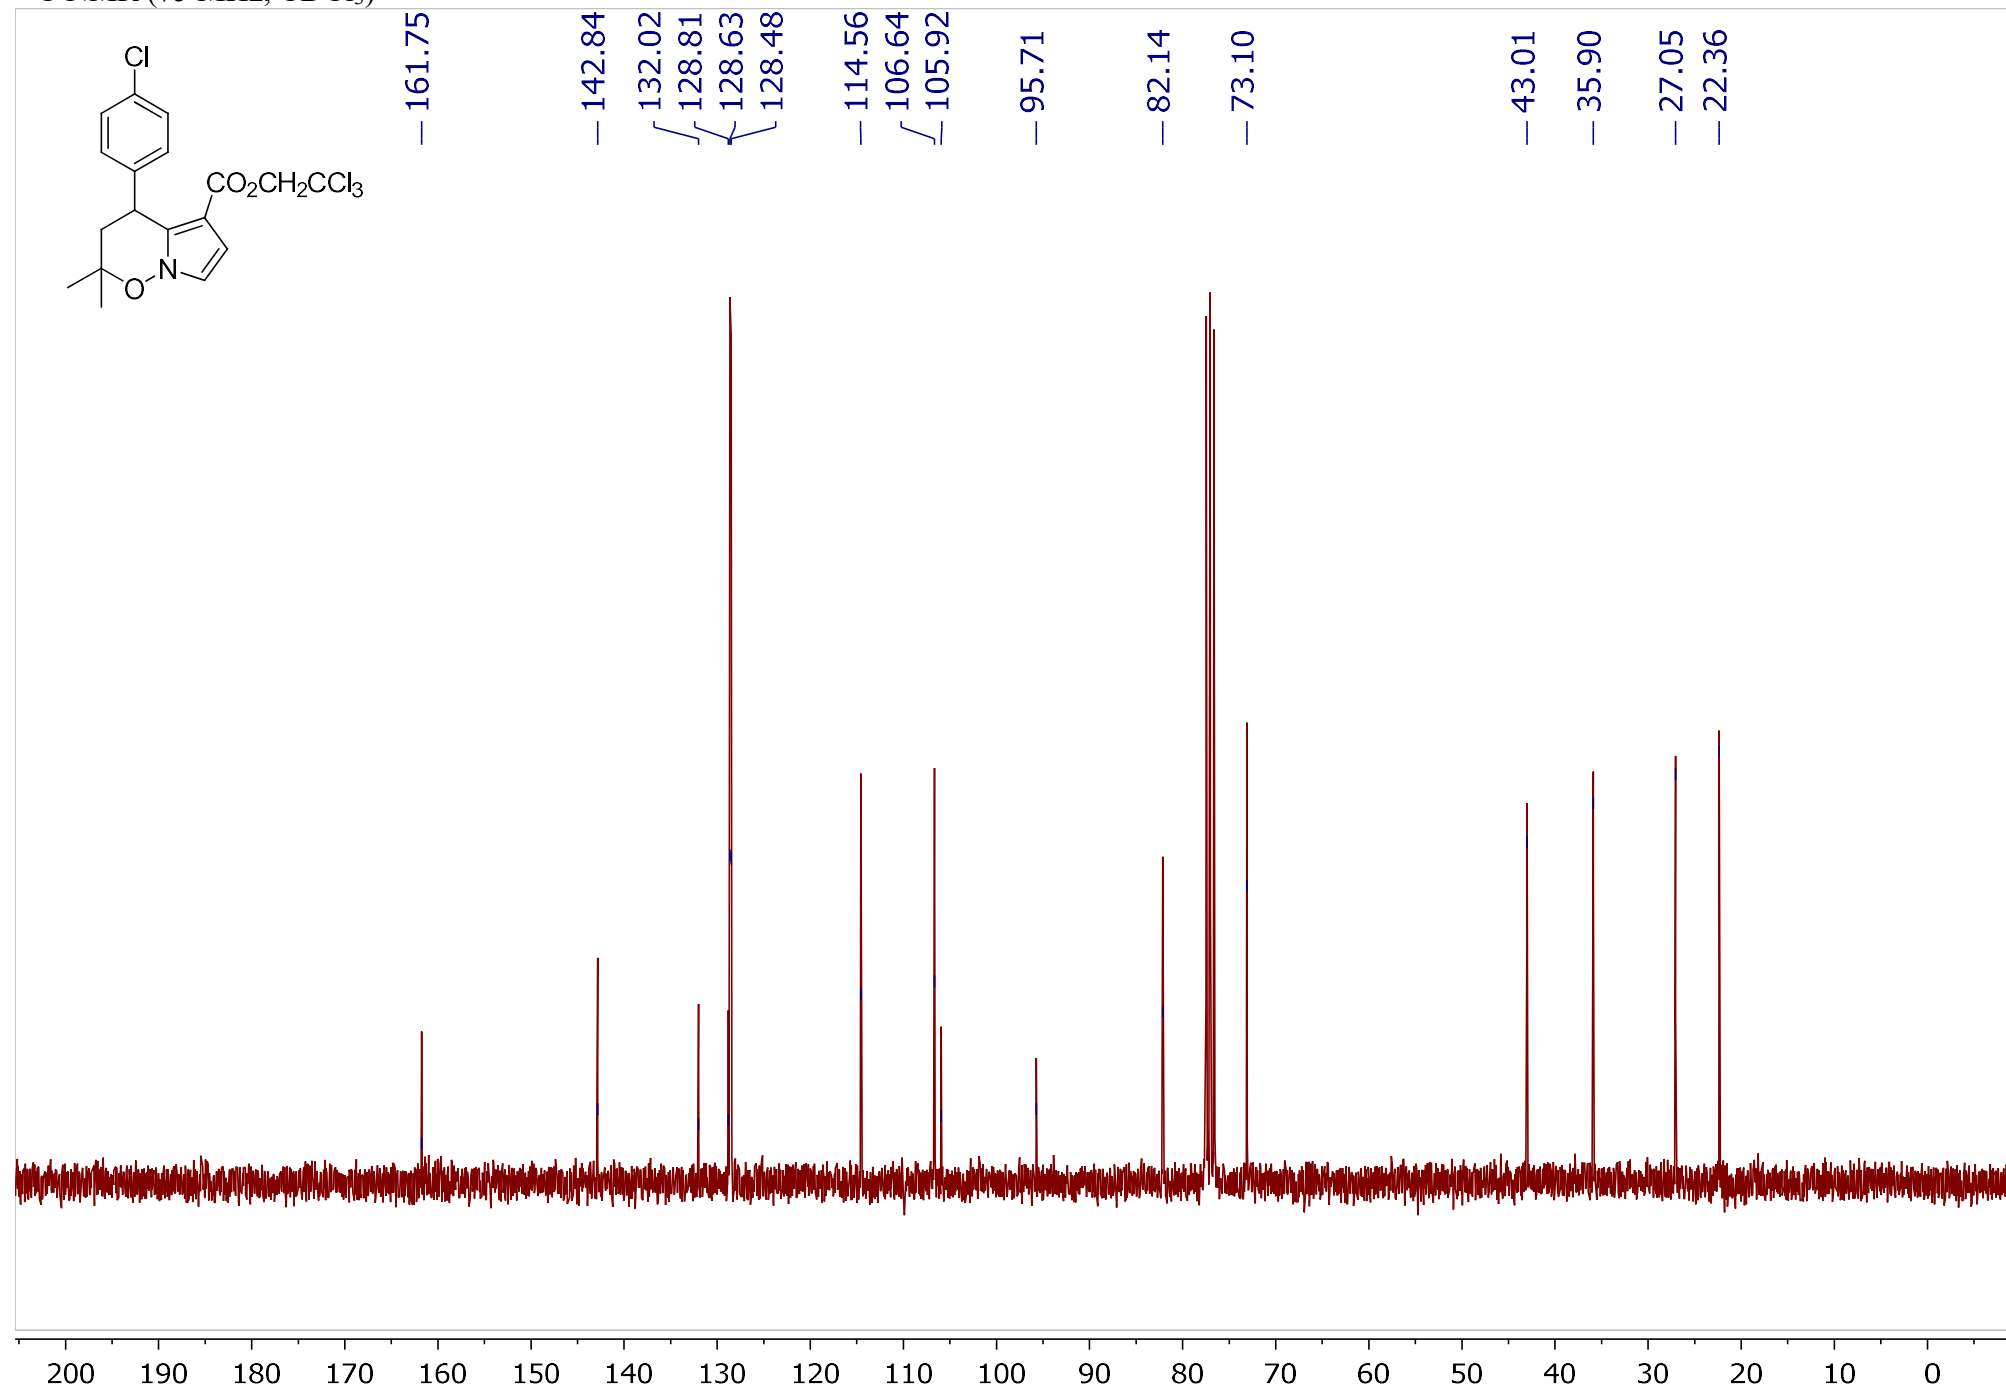



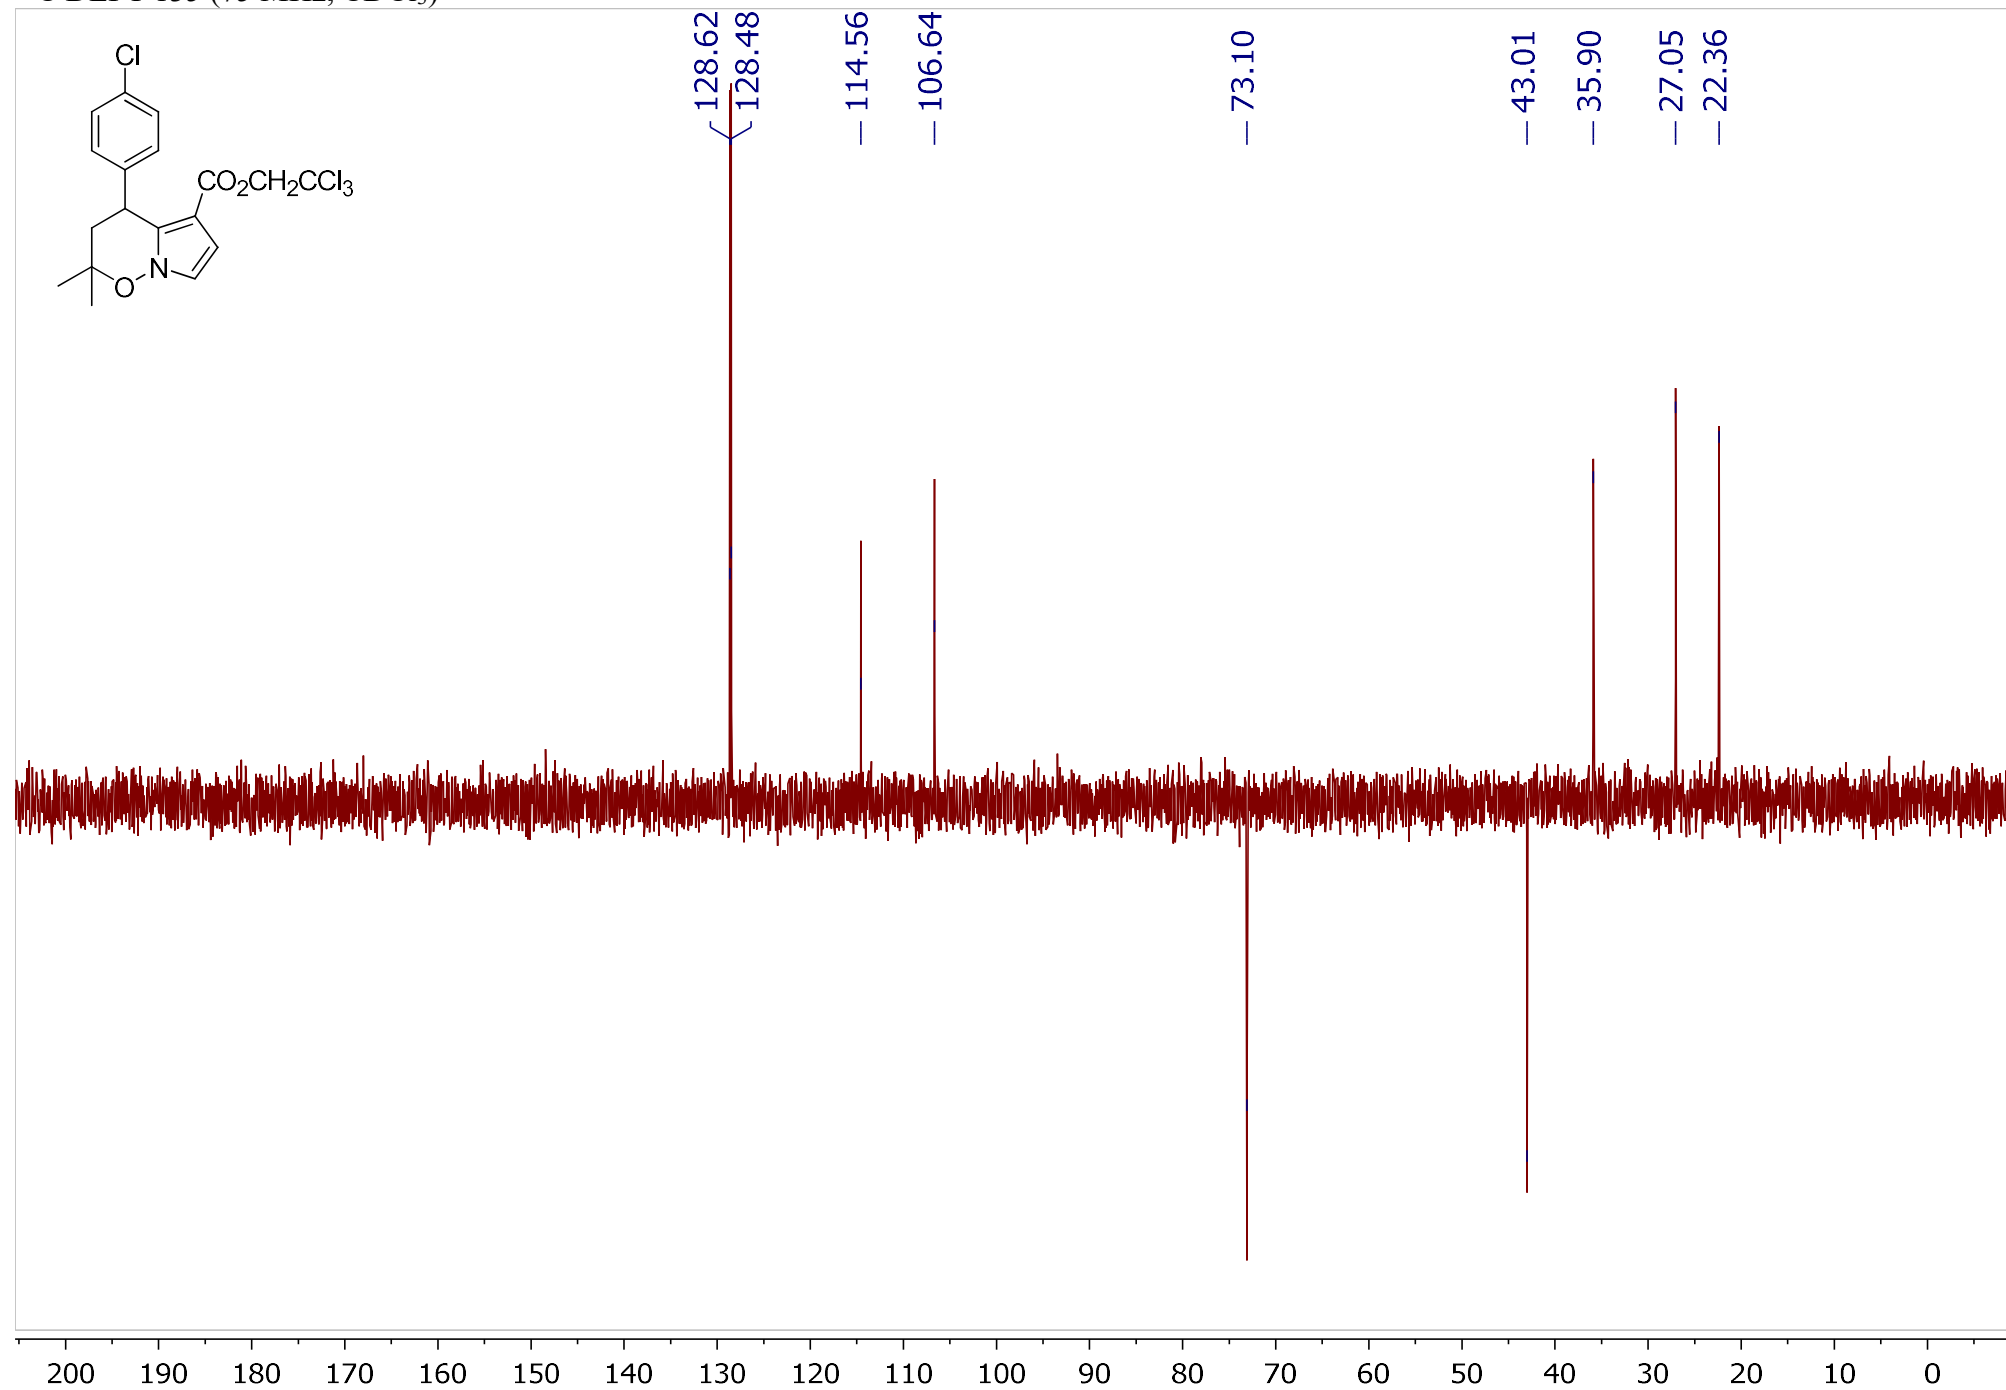

**2,2,2-Trichloroethyl 4-(benzyloxy)-2,2-dimethyl-3,4-dihydro-2H-pyrrolo[1,2-b][1,2]oxazine-5-carboxylate 4l**

$^1\text{H}$  NMR (300 MHz,  $\text{CDCl}_3$ )

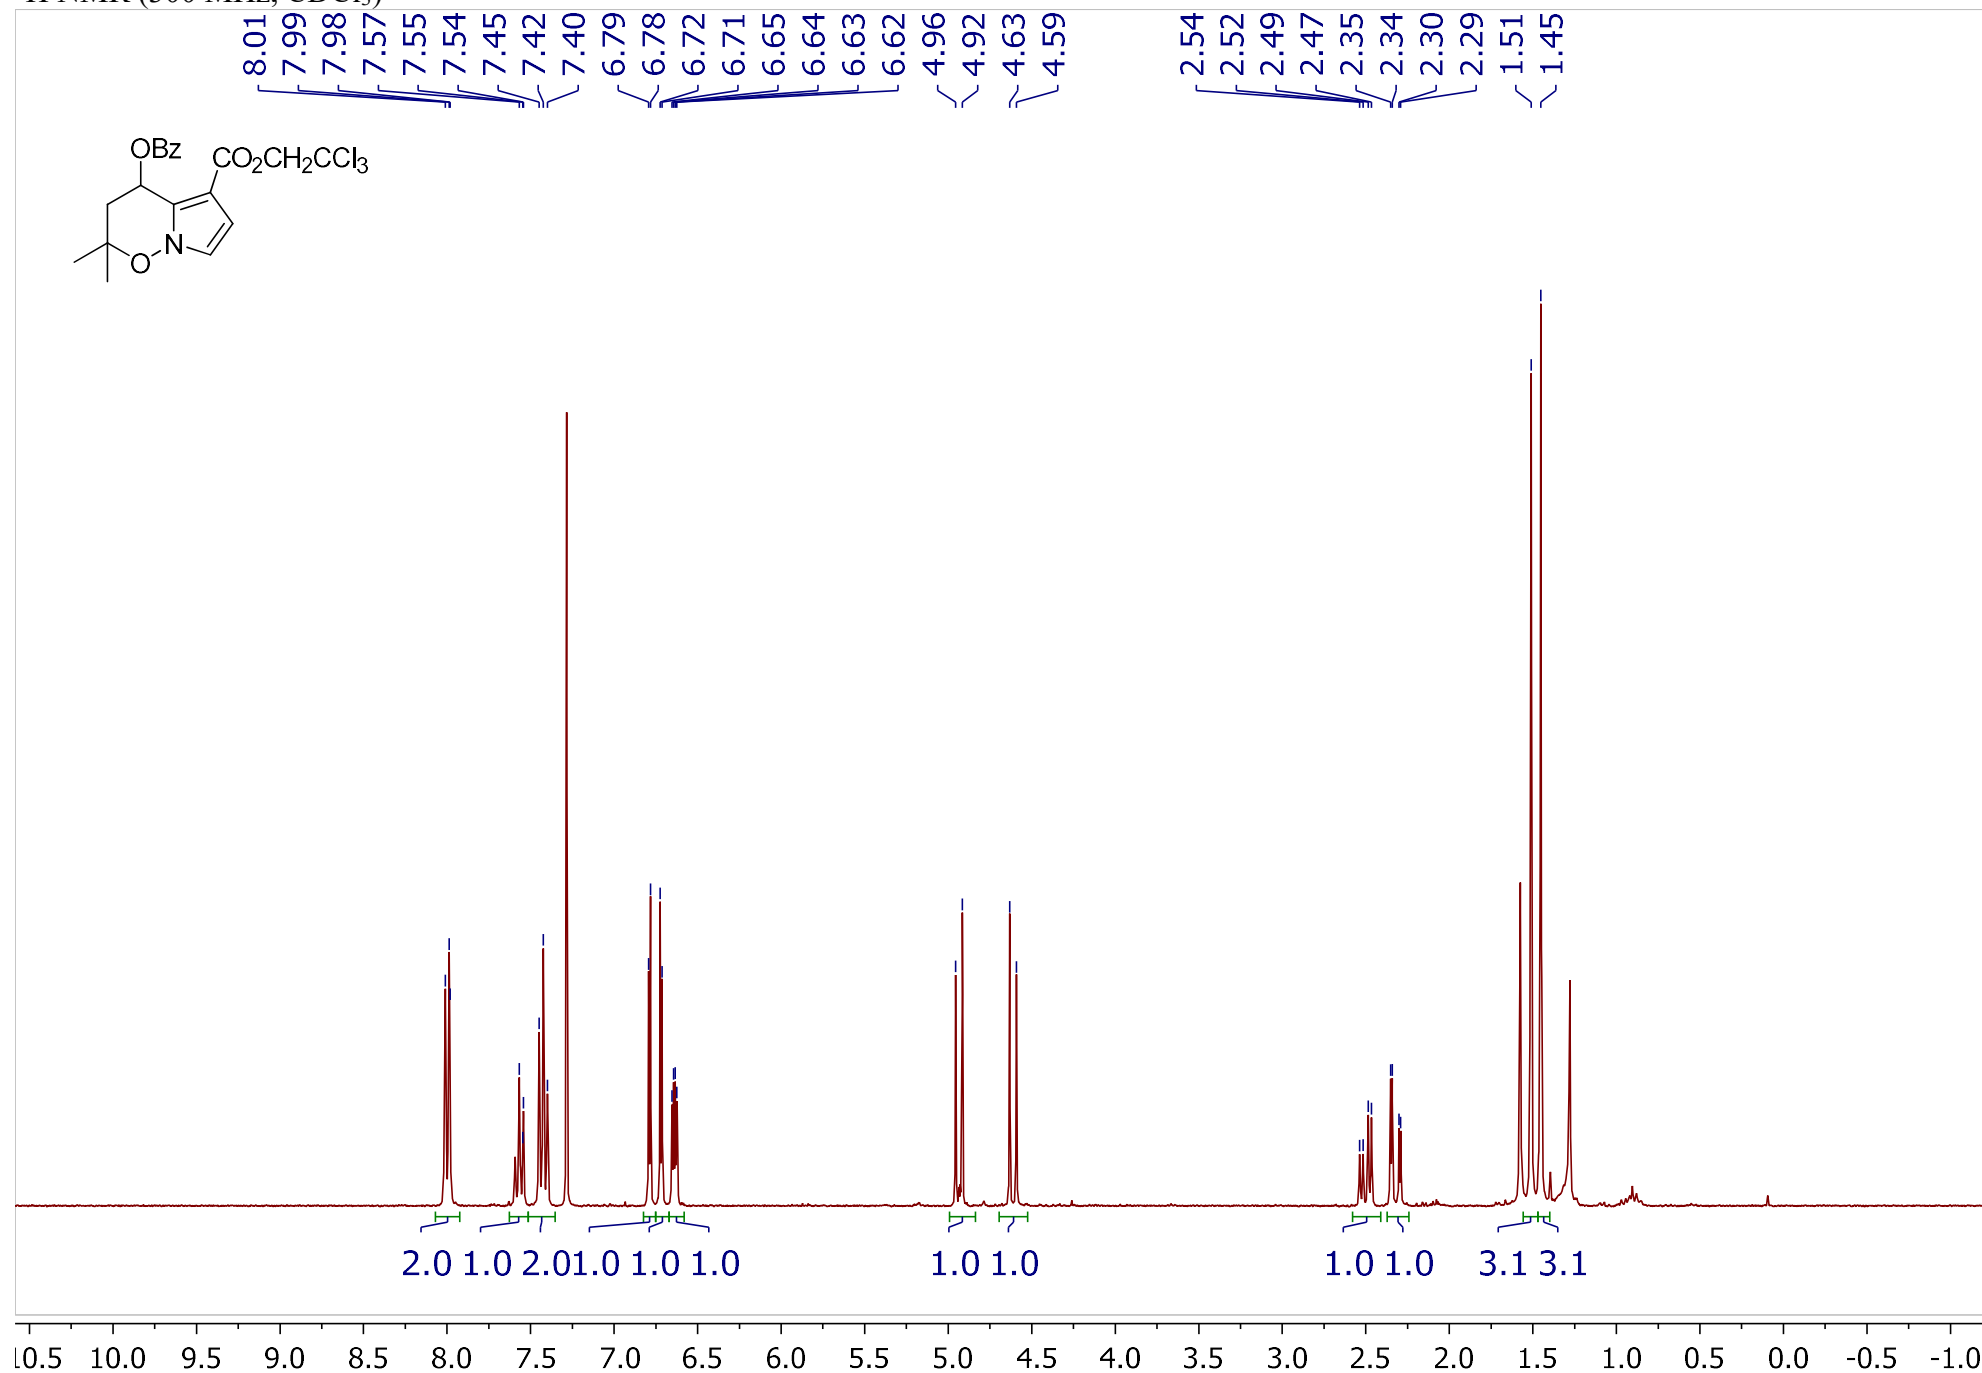

$^{13}\text{C}$  NMR (75 MHz,  $\text{CDCl}_3$ )

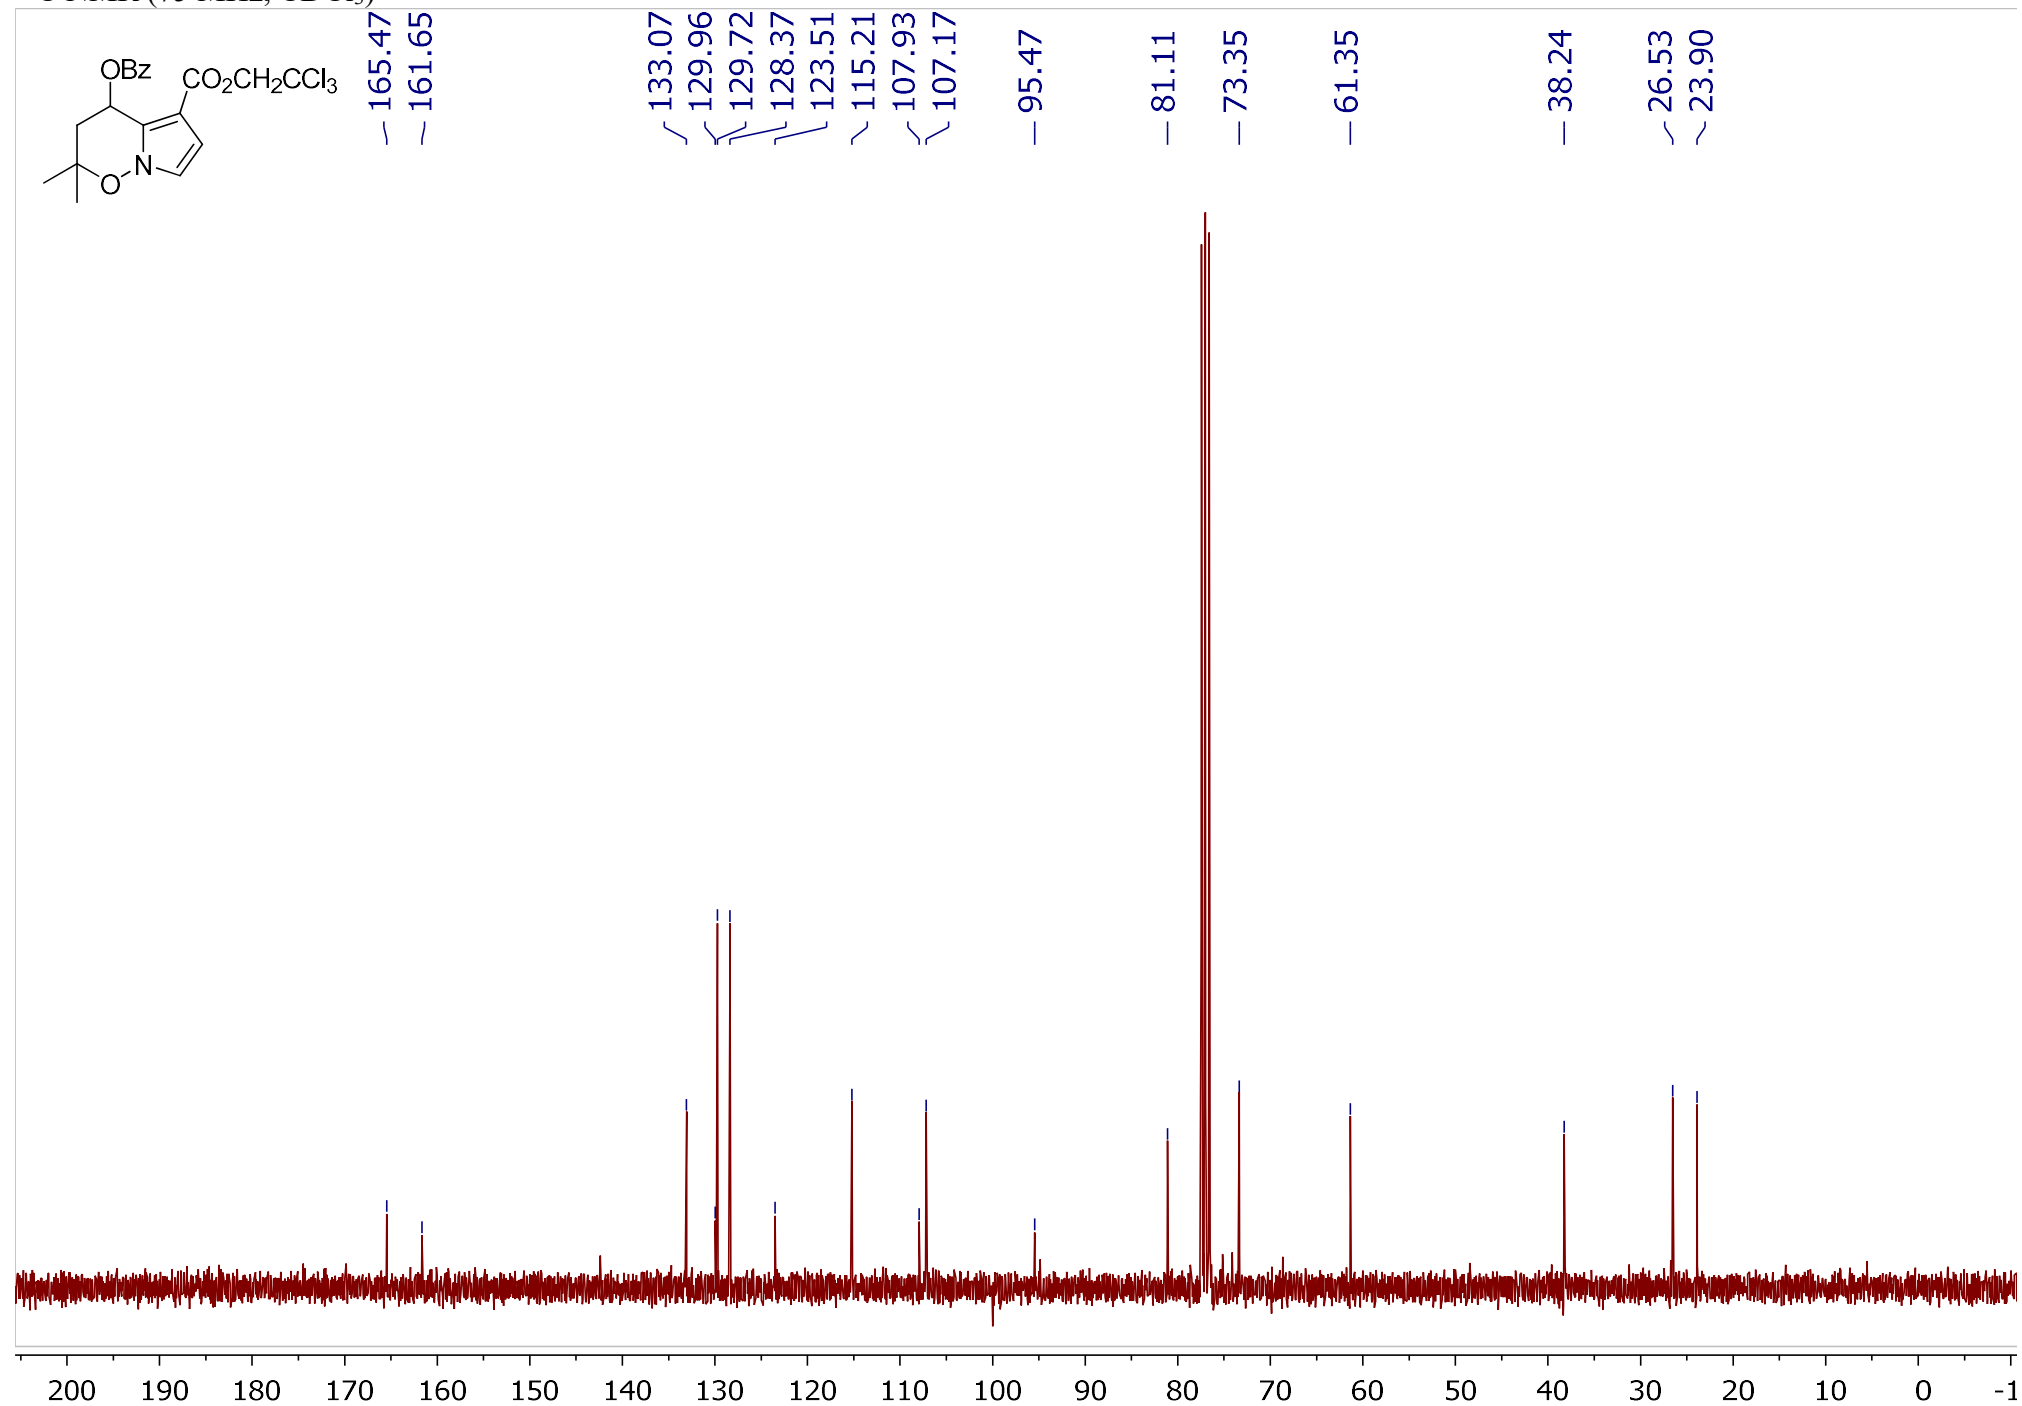

<sup>13</sup>C DEPT 135 (75 MHz, CDCl<sub>3</sub>)

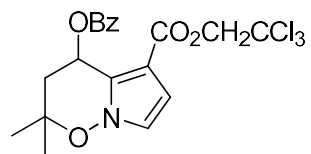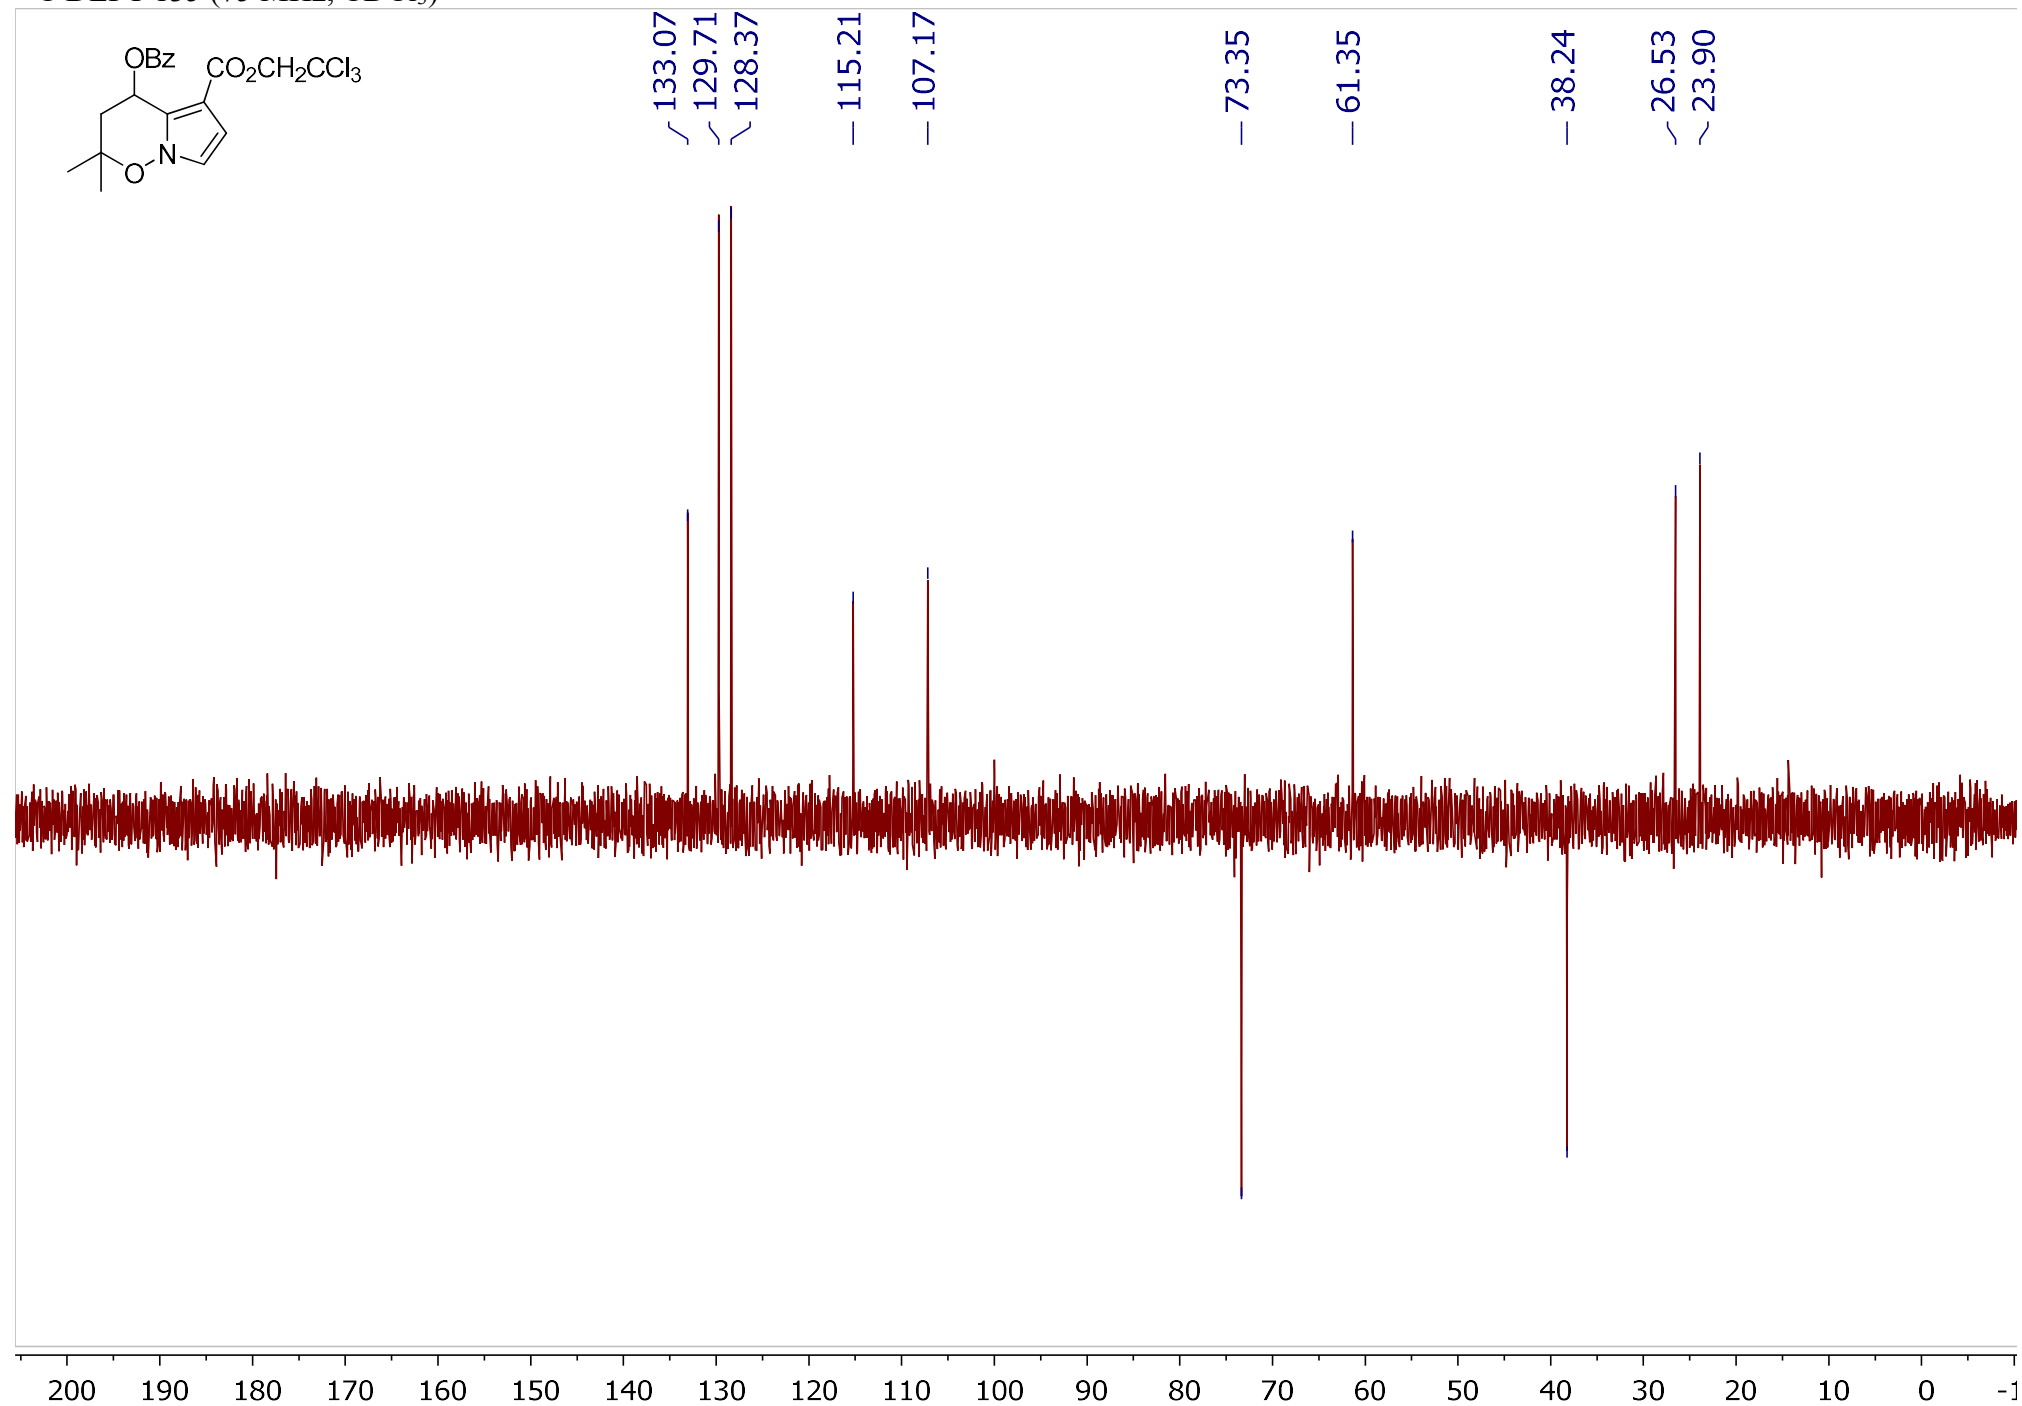

**2,2,2-Trichloroethyl 2,2-dimethyl-4-phenethyl-3,4-dihydro-2H-pyrrolo[1,2-b][1,2]oxazine-5-carboxylate 4m**

<sup>1</sup>H NMR (300 MHz, CDCl<sub>3</sub>)

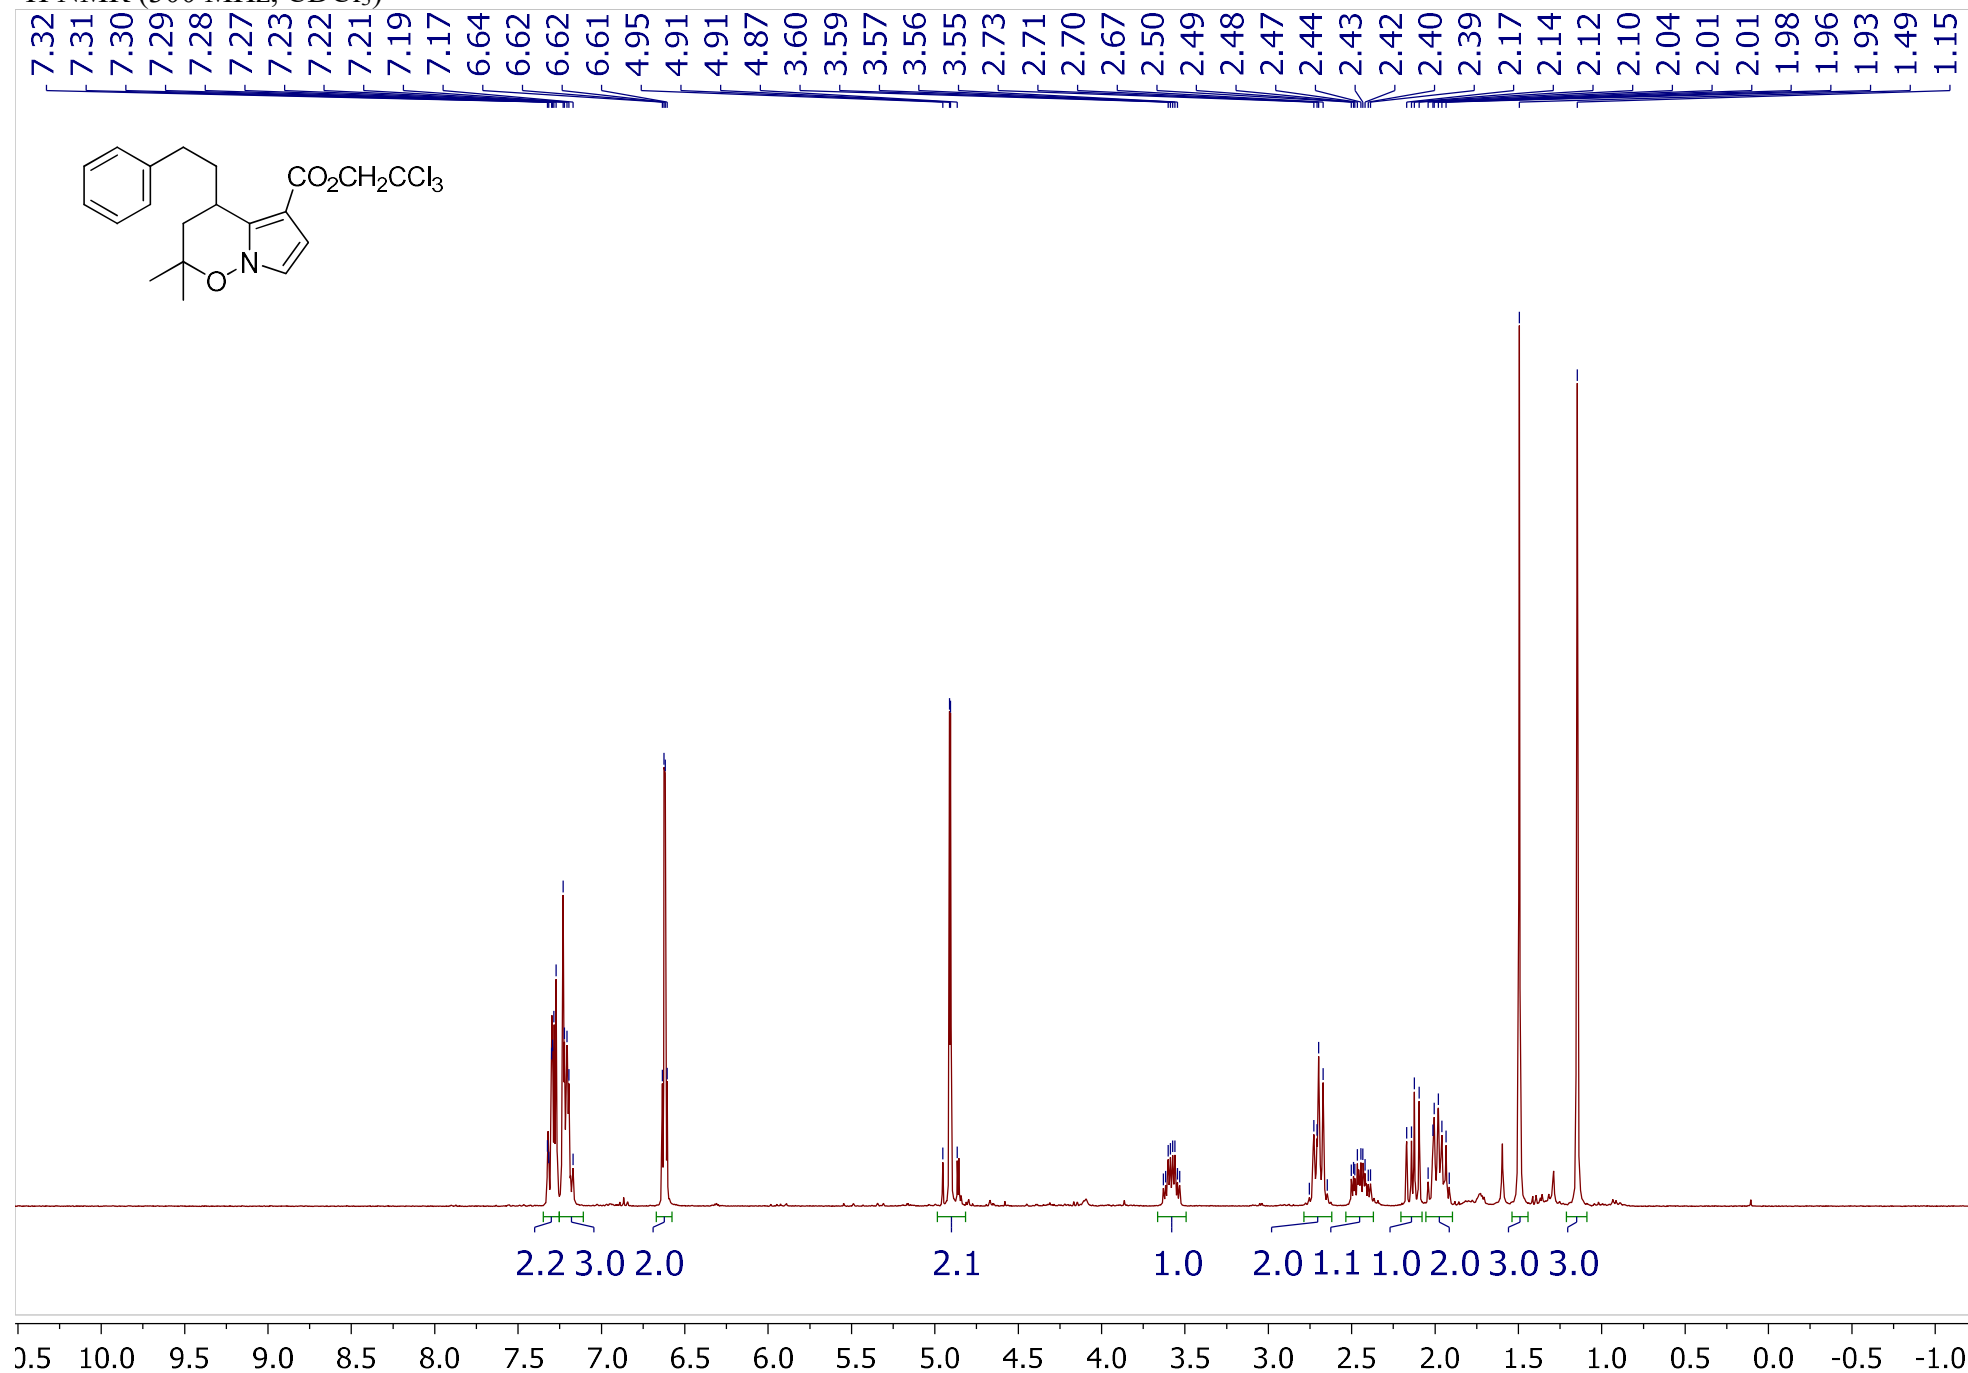

<sup>13</sup>C NMR (75 MHz, CDCl<sub>3</sub>)

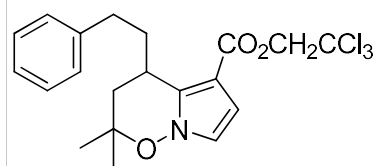

— 162.58

— 141.86

~ 132.23

~ 128.35

~ 125.85

~ 114.41

~ 106.52

~ 104.94

— 95.83

— 82.74

— 73.55

~ 38.99

~ 36.85

~ 32.89

~ 29.62

~ 27.61

~ 23.00

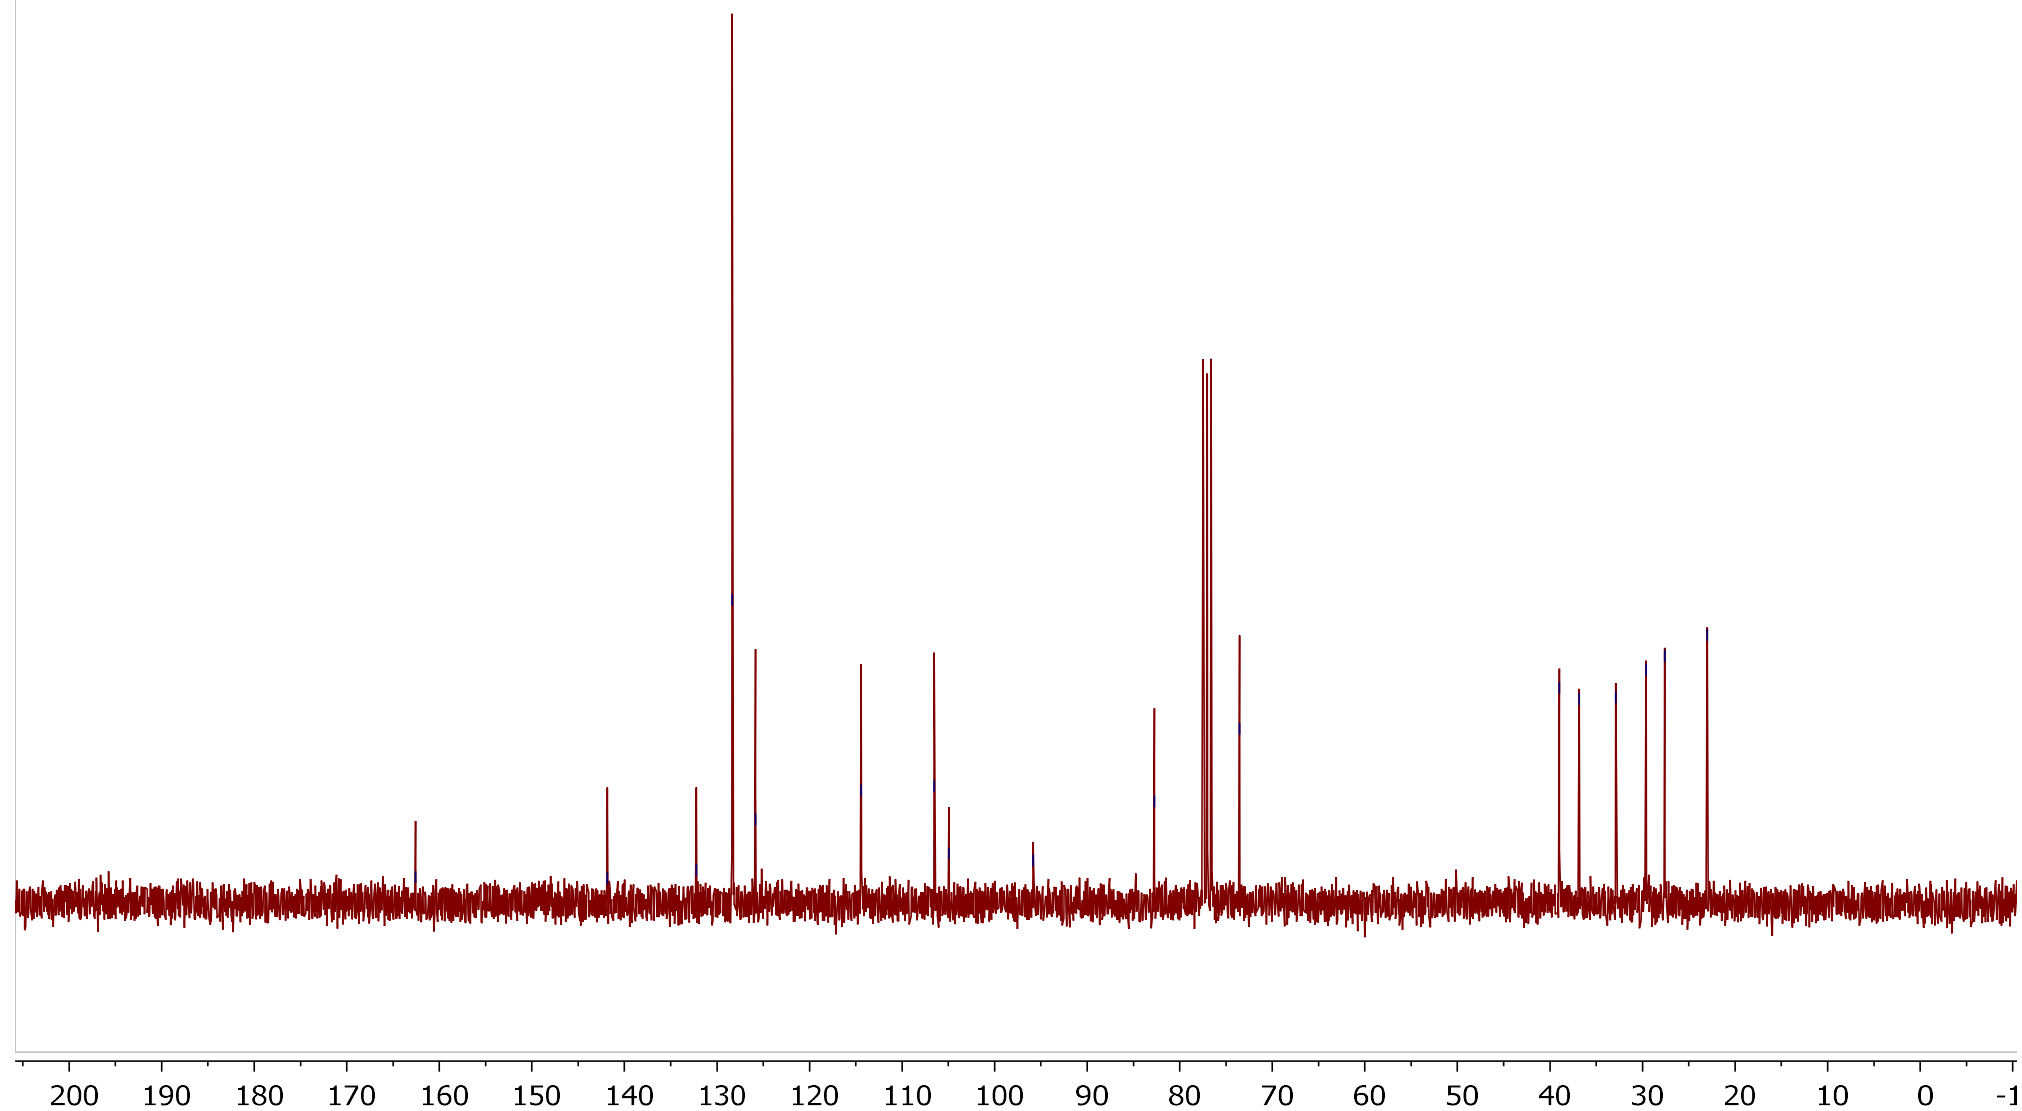

<sup>13</sup>C DEPT 135 (75 MHz, CDCl<sub>3</sub>)

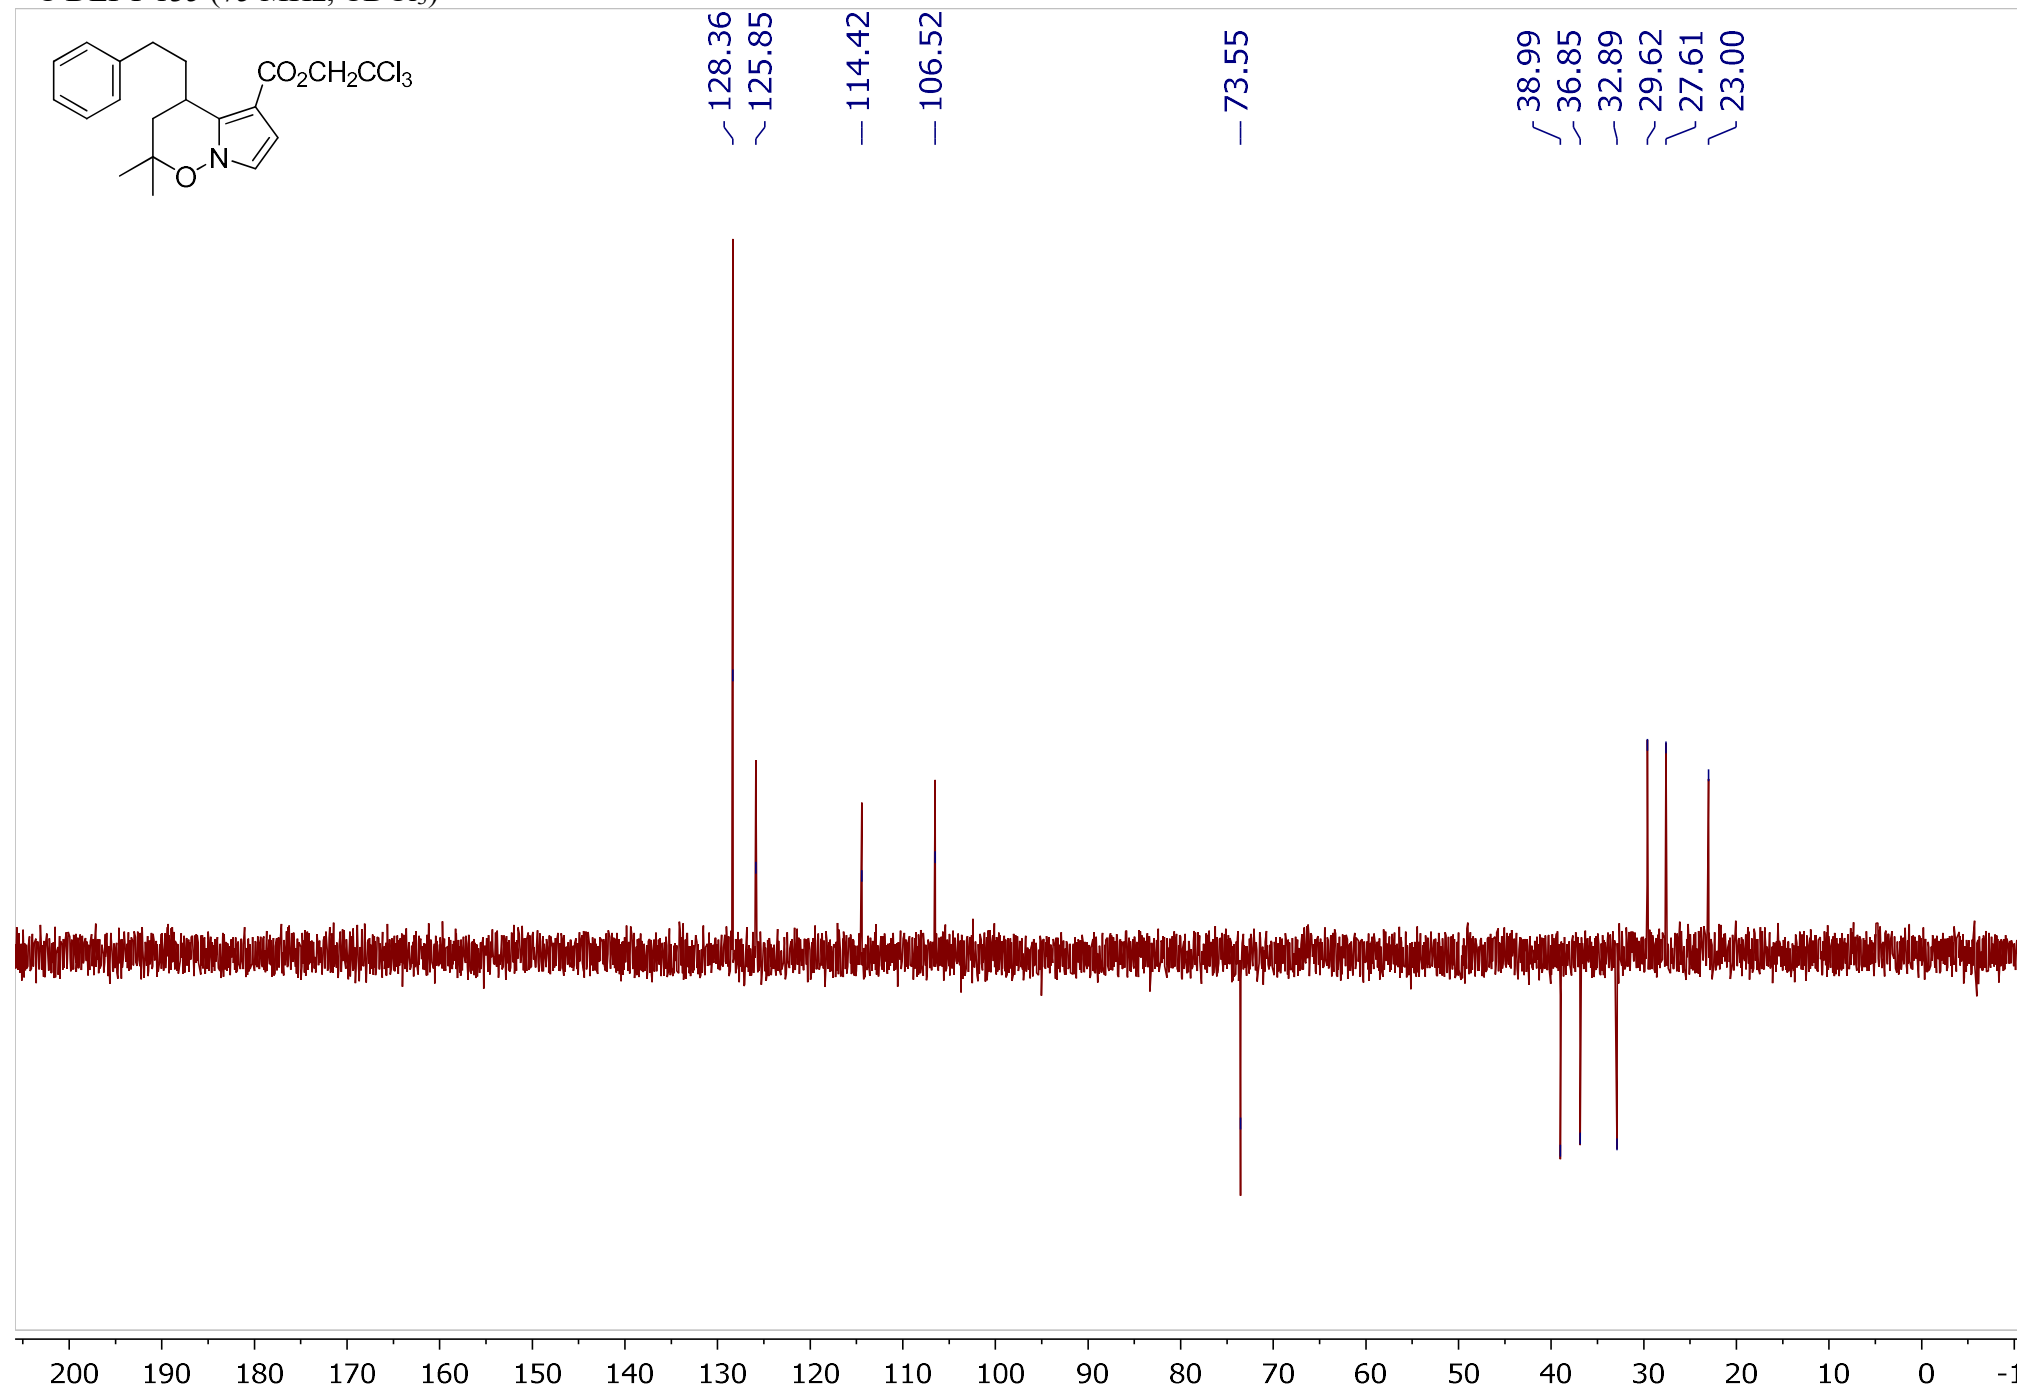

$^1\text{H}$ - $^1\text{H}$  COSY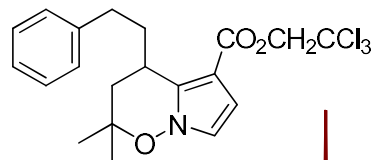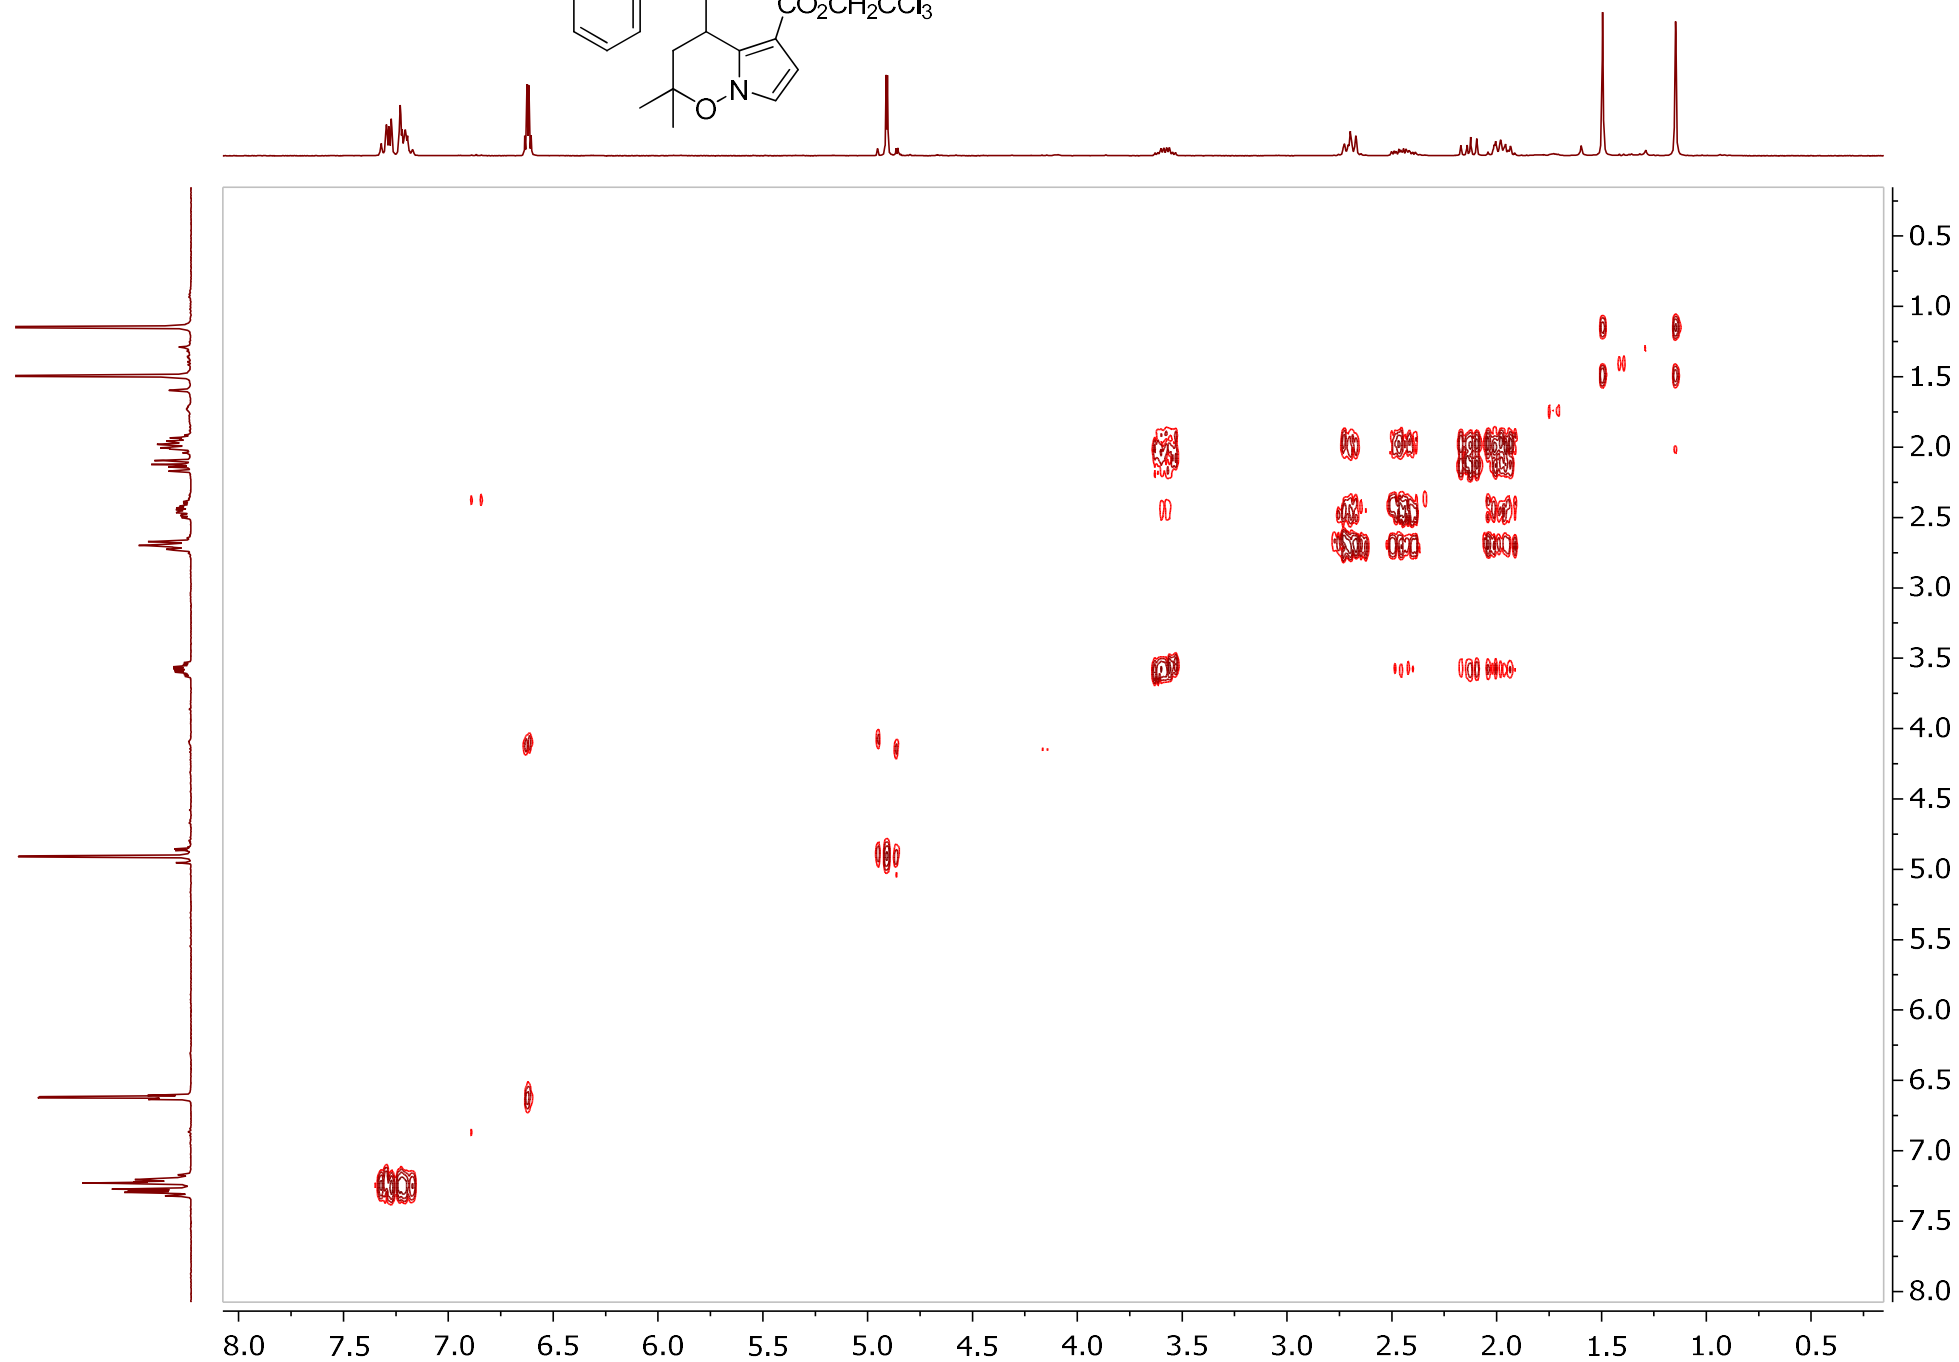



$^1\text{H}$ - $^{13}\text{C}$  HSQC

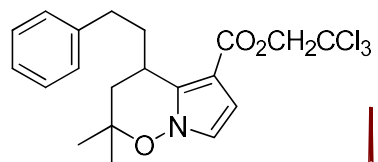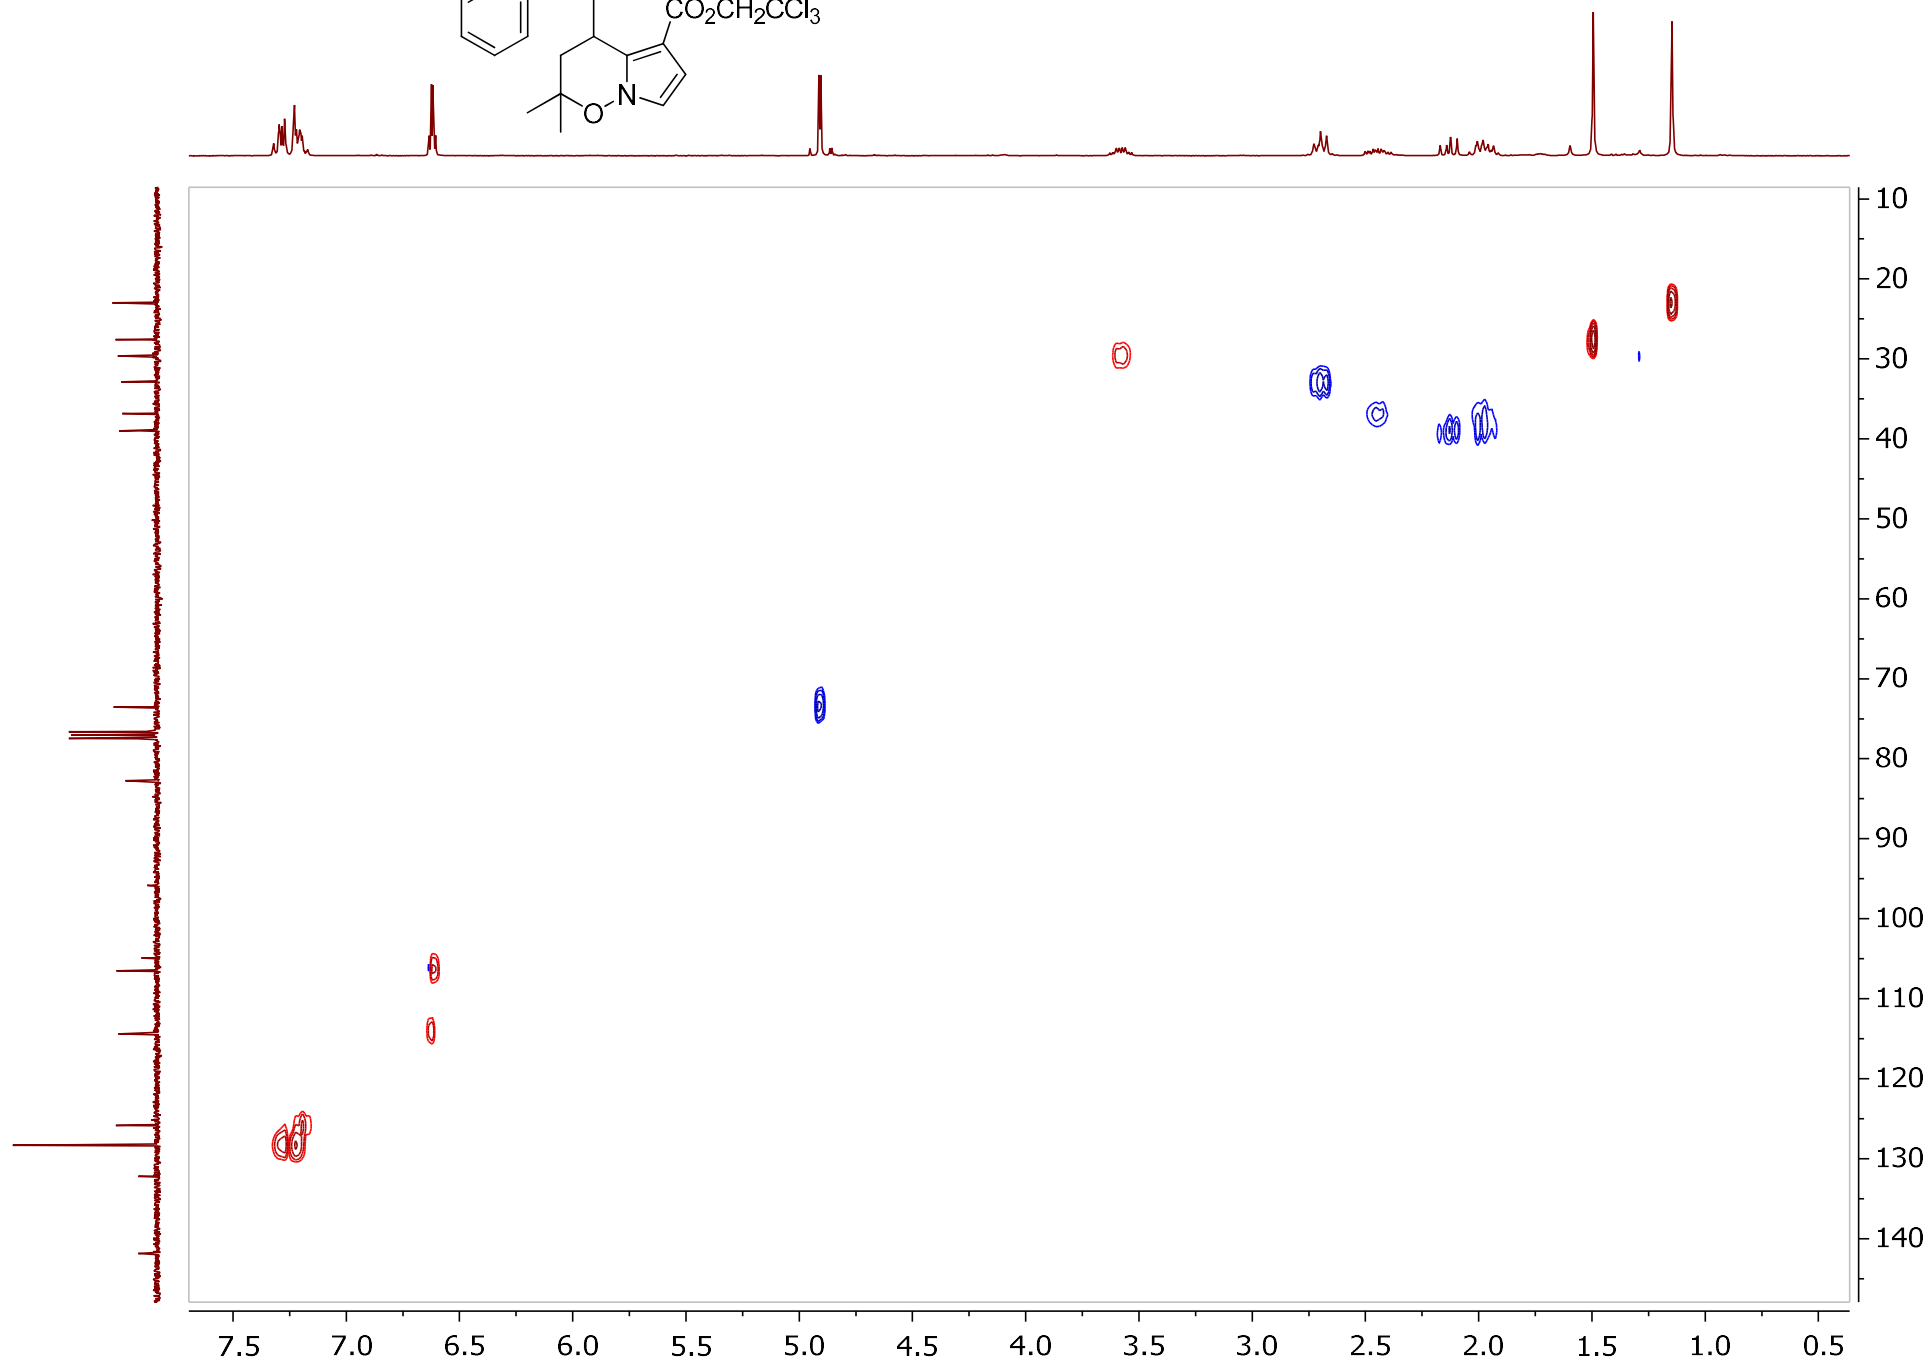

**2,2,2-Trichloroethyl (2R\*,4S\*)-2,4-diphenyl-3,4-dihydro-2H-pyrrolo[1,2-b][1,2]oxazine-5-carboxylate 4n**

<sup>1</sup>H NMR (300 MHz, CDCl<sub>3</sub>)

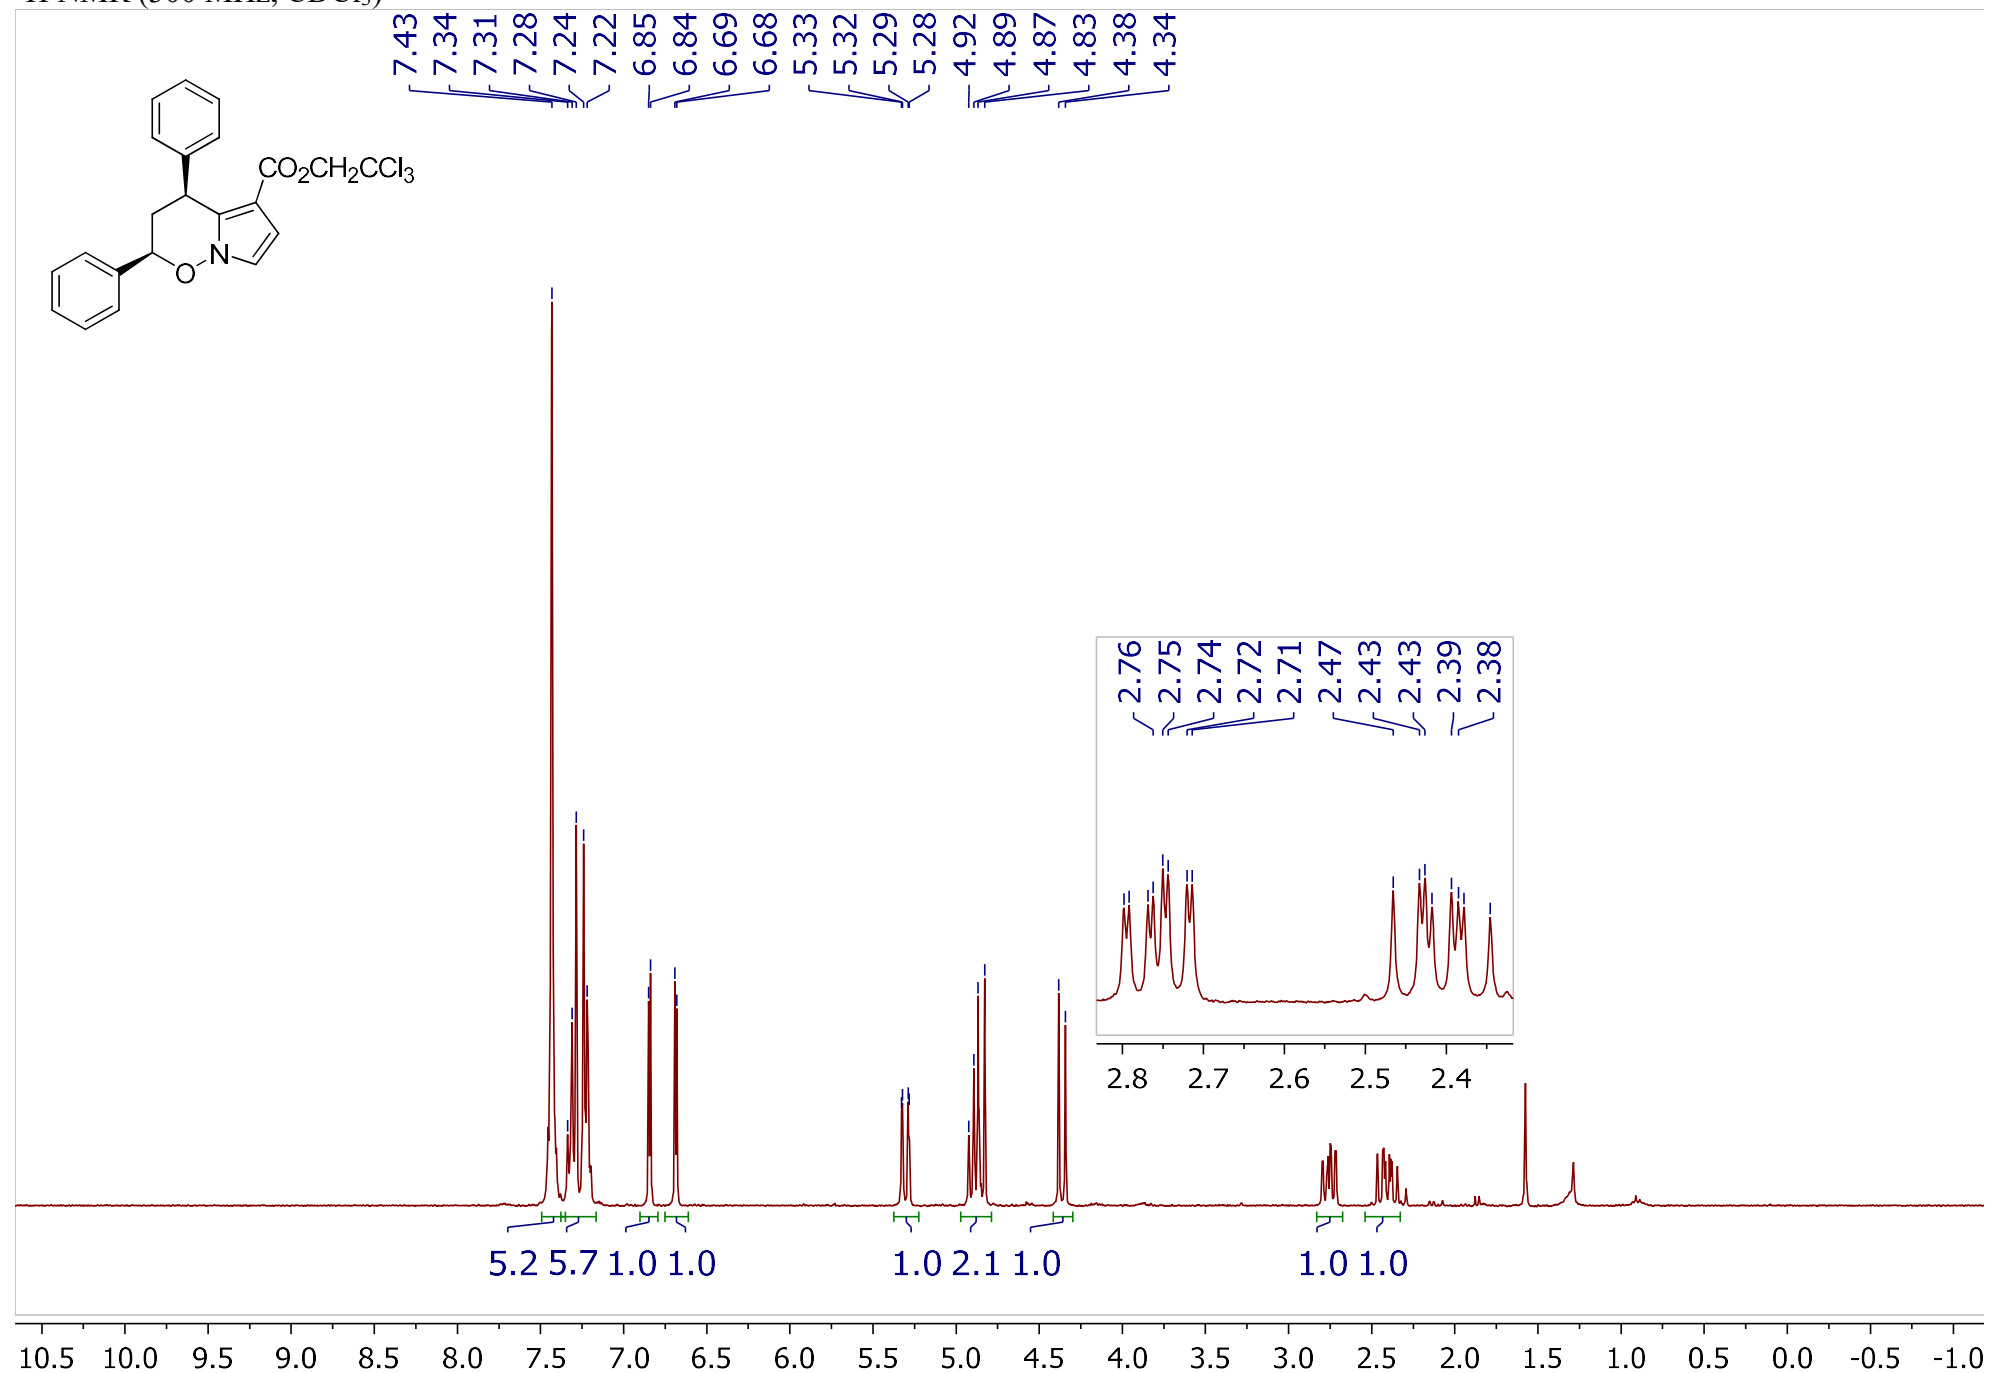

<sup>13</sup>C NMR (75 MHz, CDCl<sub>3</sub>)

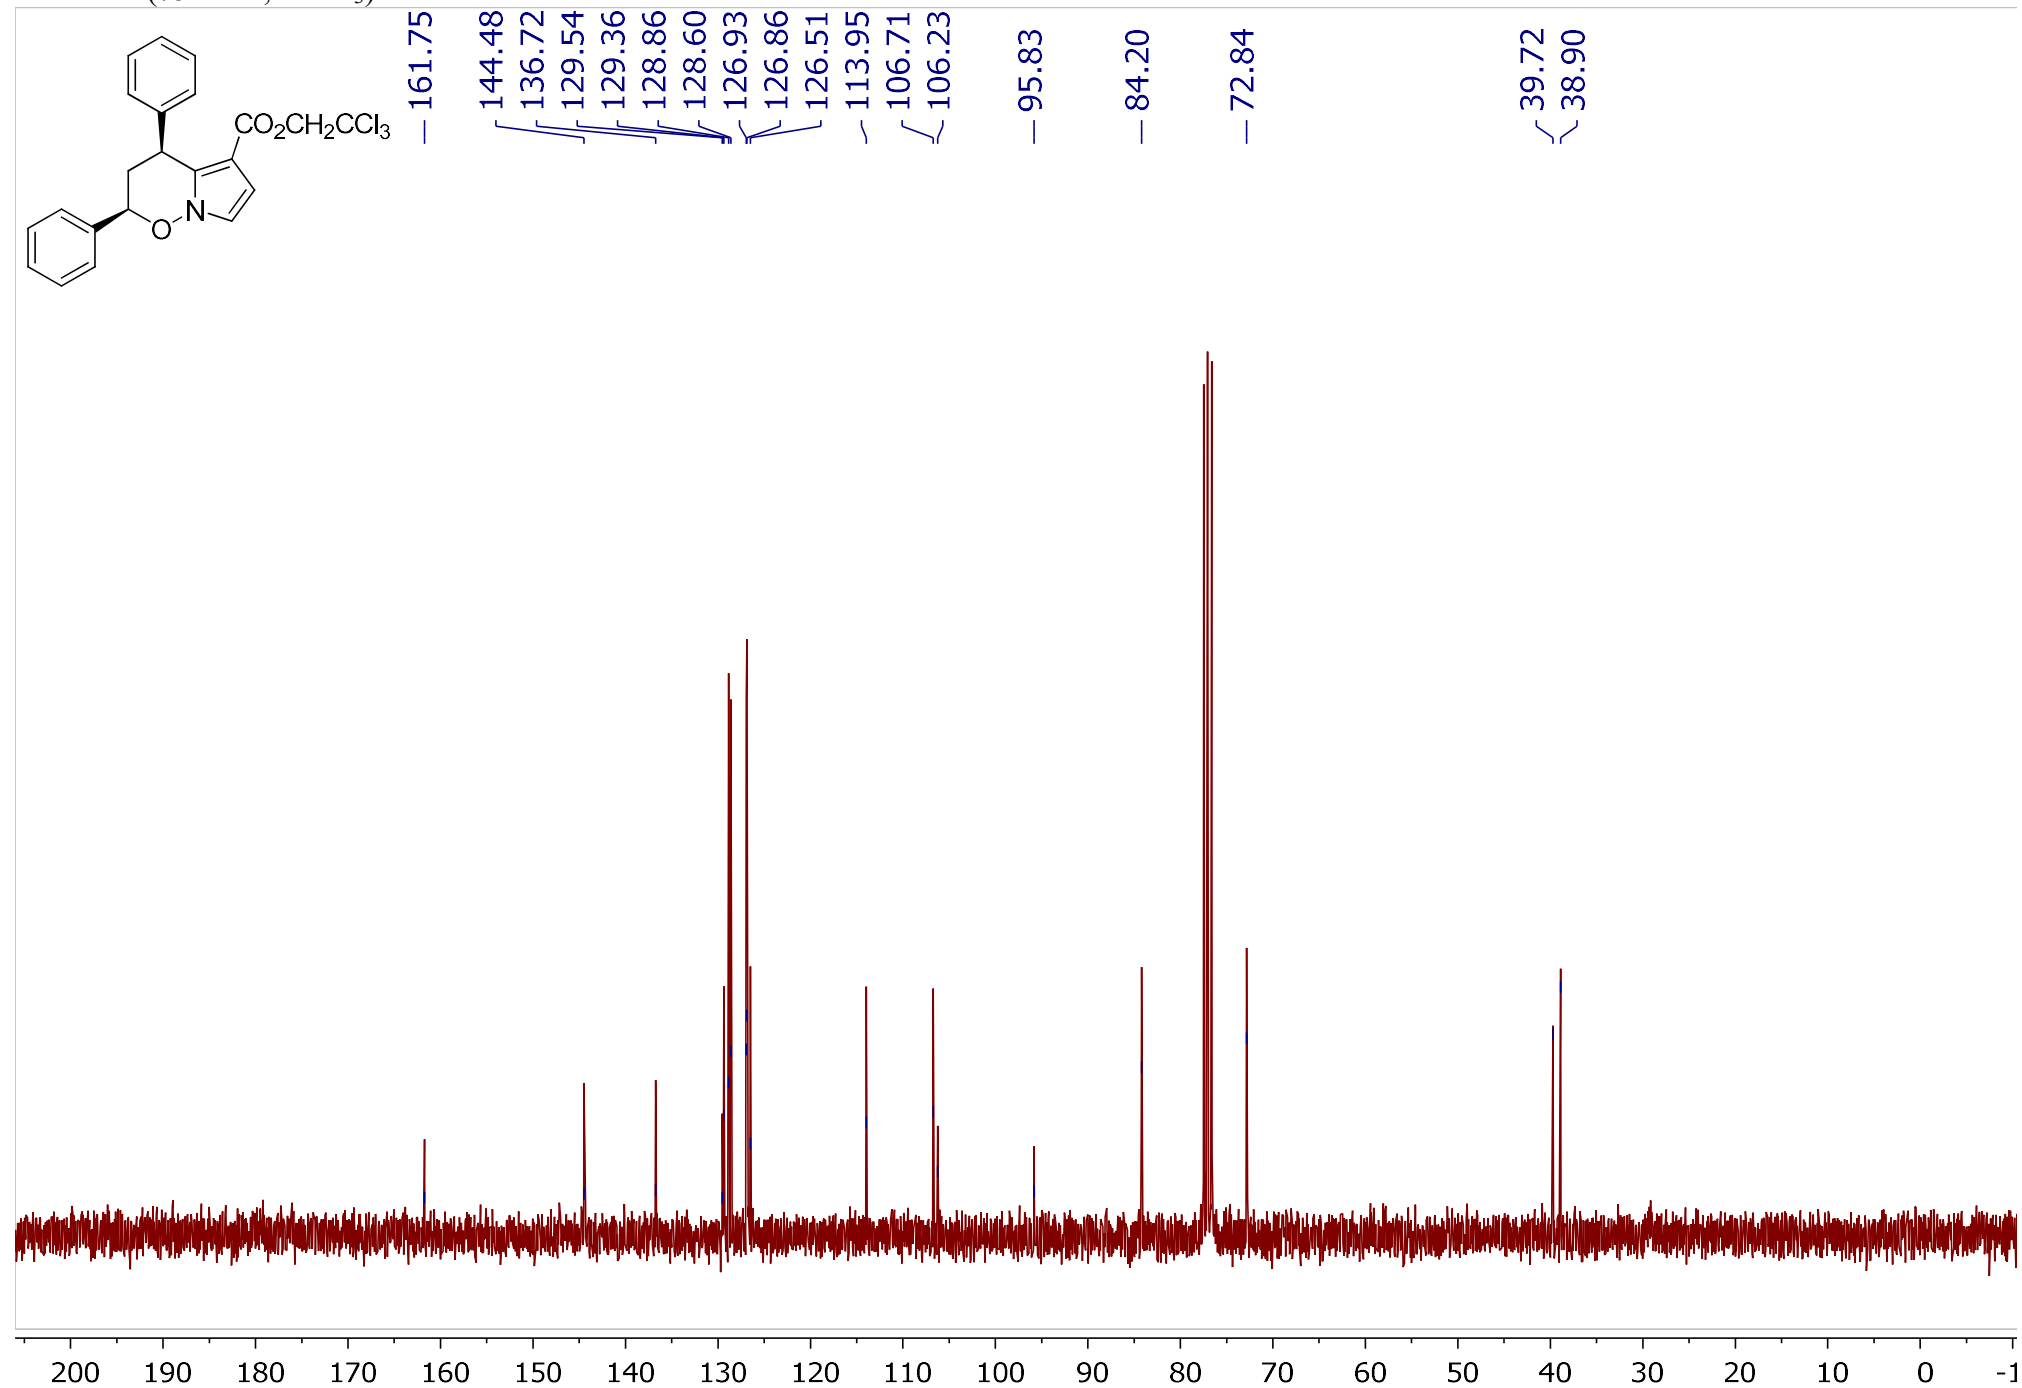

$^{13}\text{C}$  DEPT 135 (75 MHz,  $\text{CDCl}_3$ )

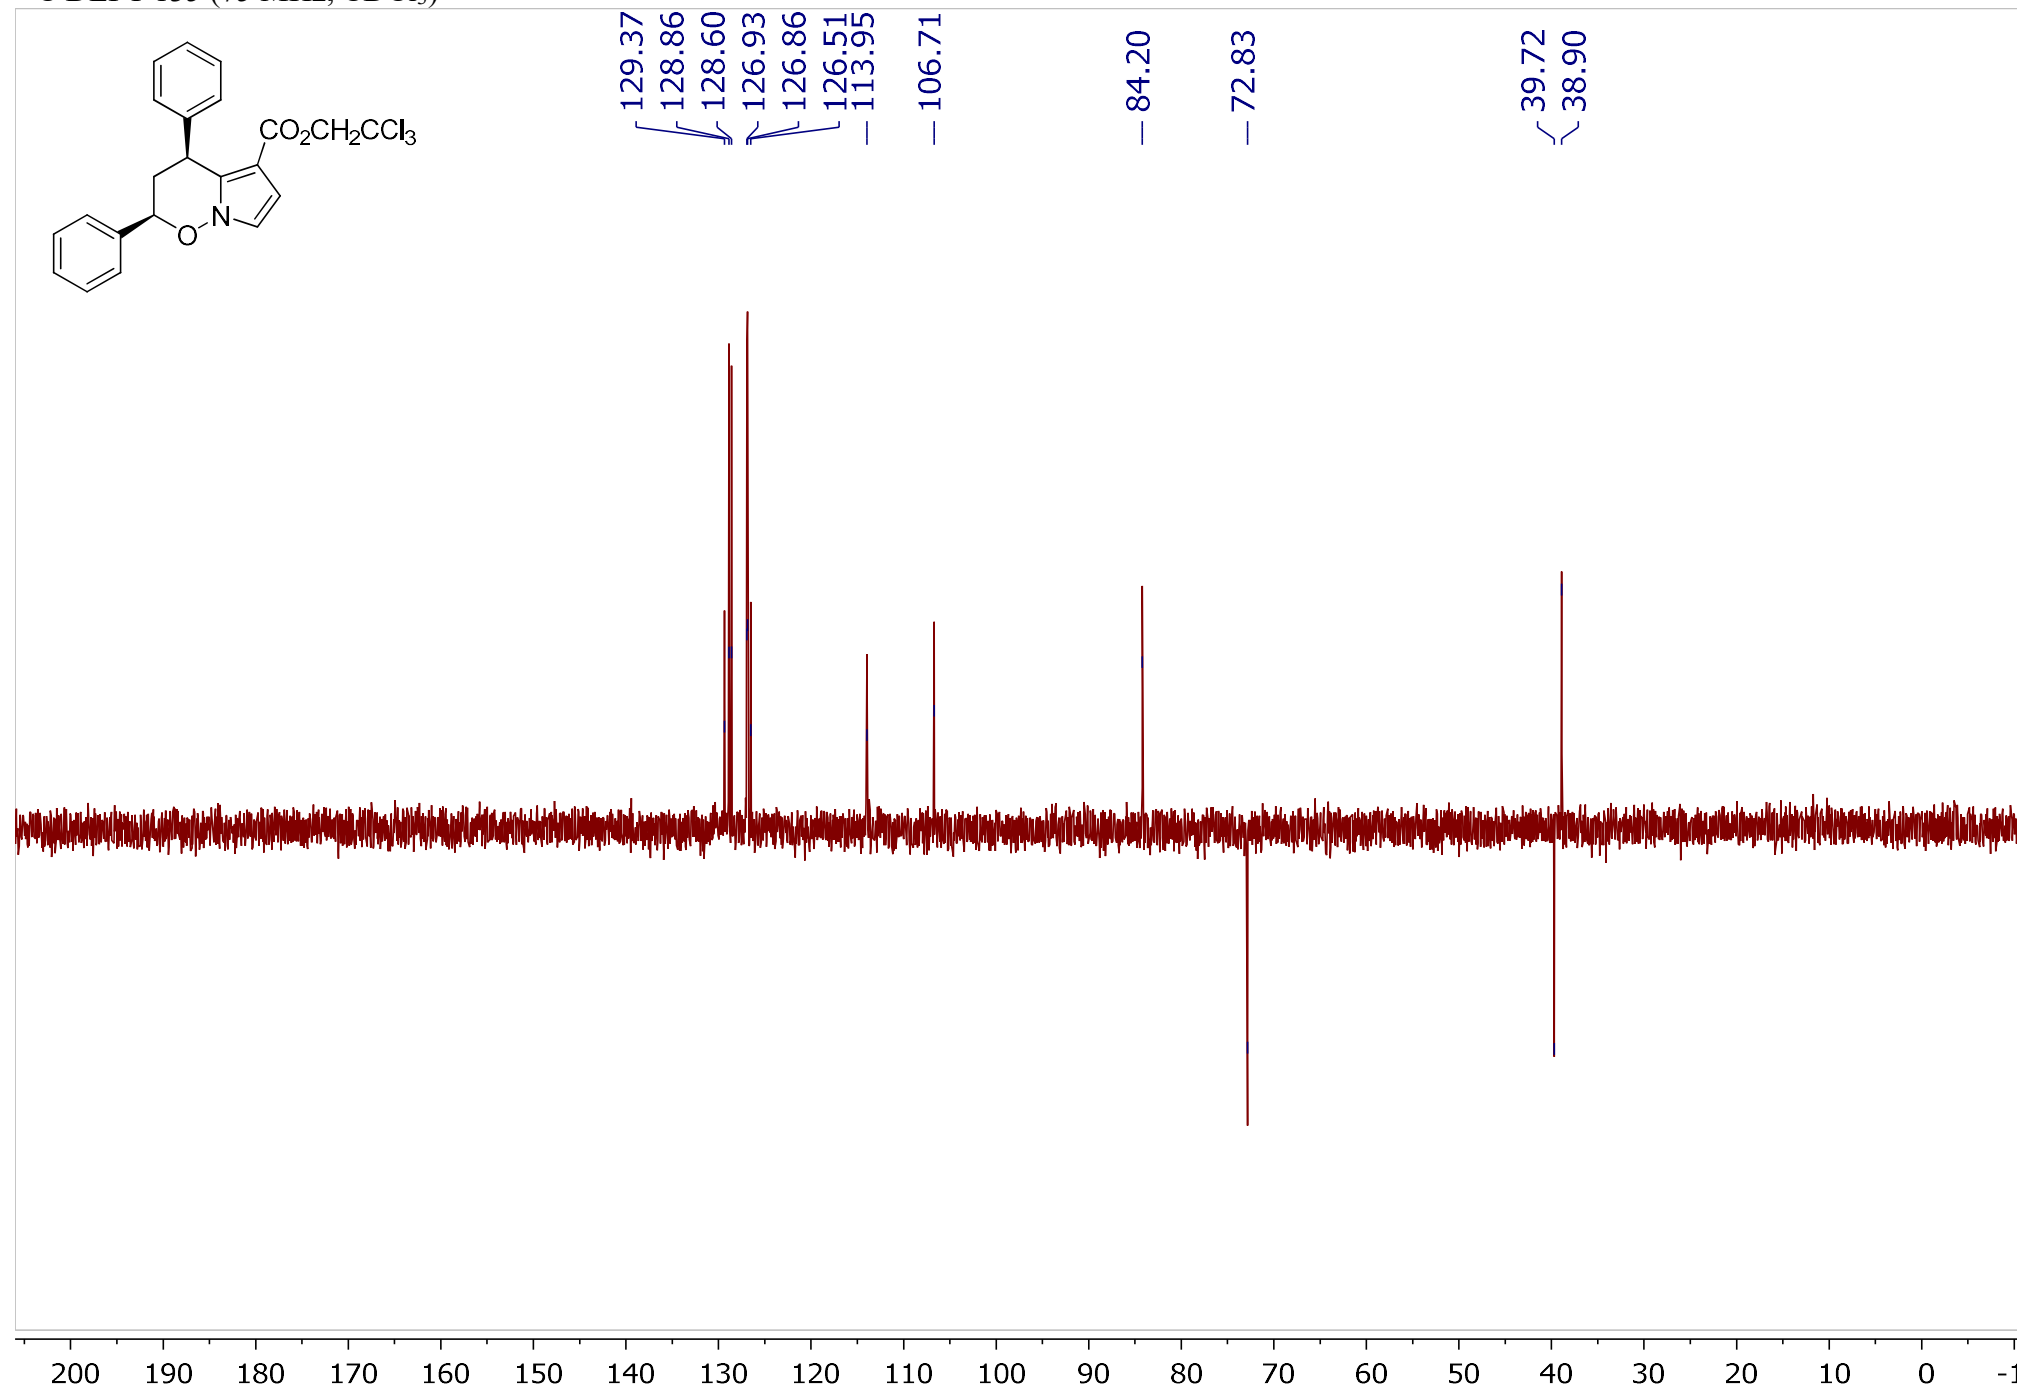

**2,2,2-Trichloroethyl (2S\*,4S\*)-2-ethoxy-4-(4-methoxyphenyl)-3,4-dihydro-2H-pyrrolo[1,2-b][1,2]oxazine-5-carboxylate 4o**

<sup>1</sup>H NMR (300 MHz, CDCl<sub>3</sub>)

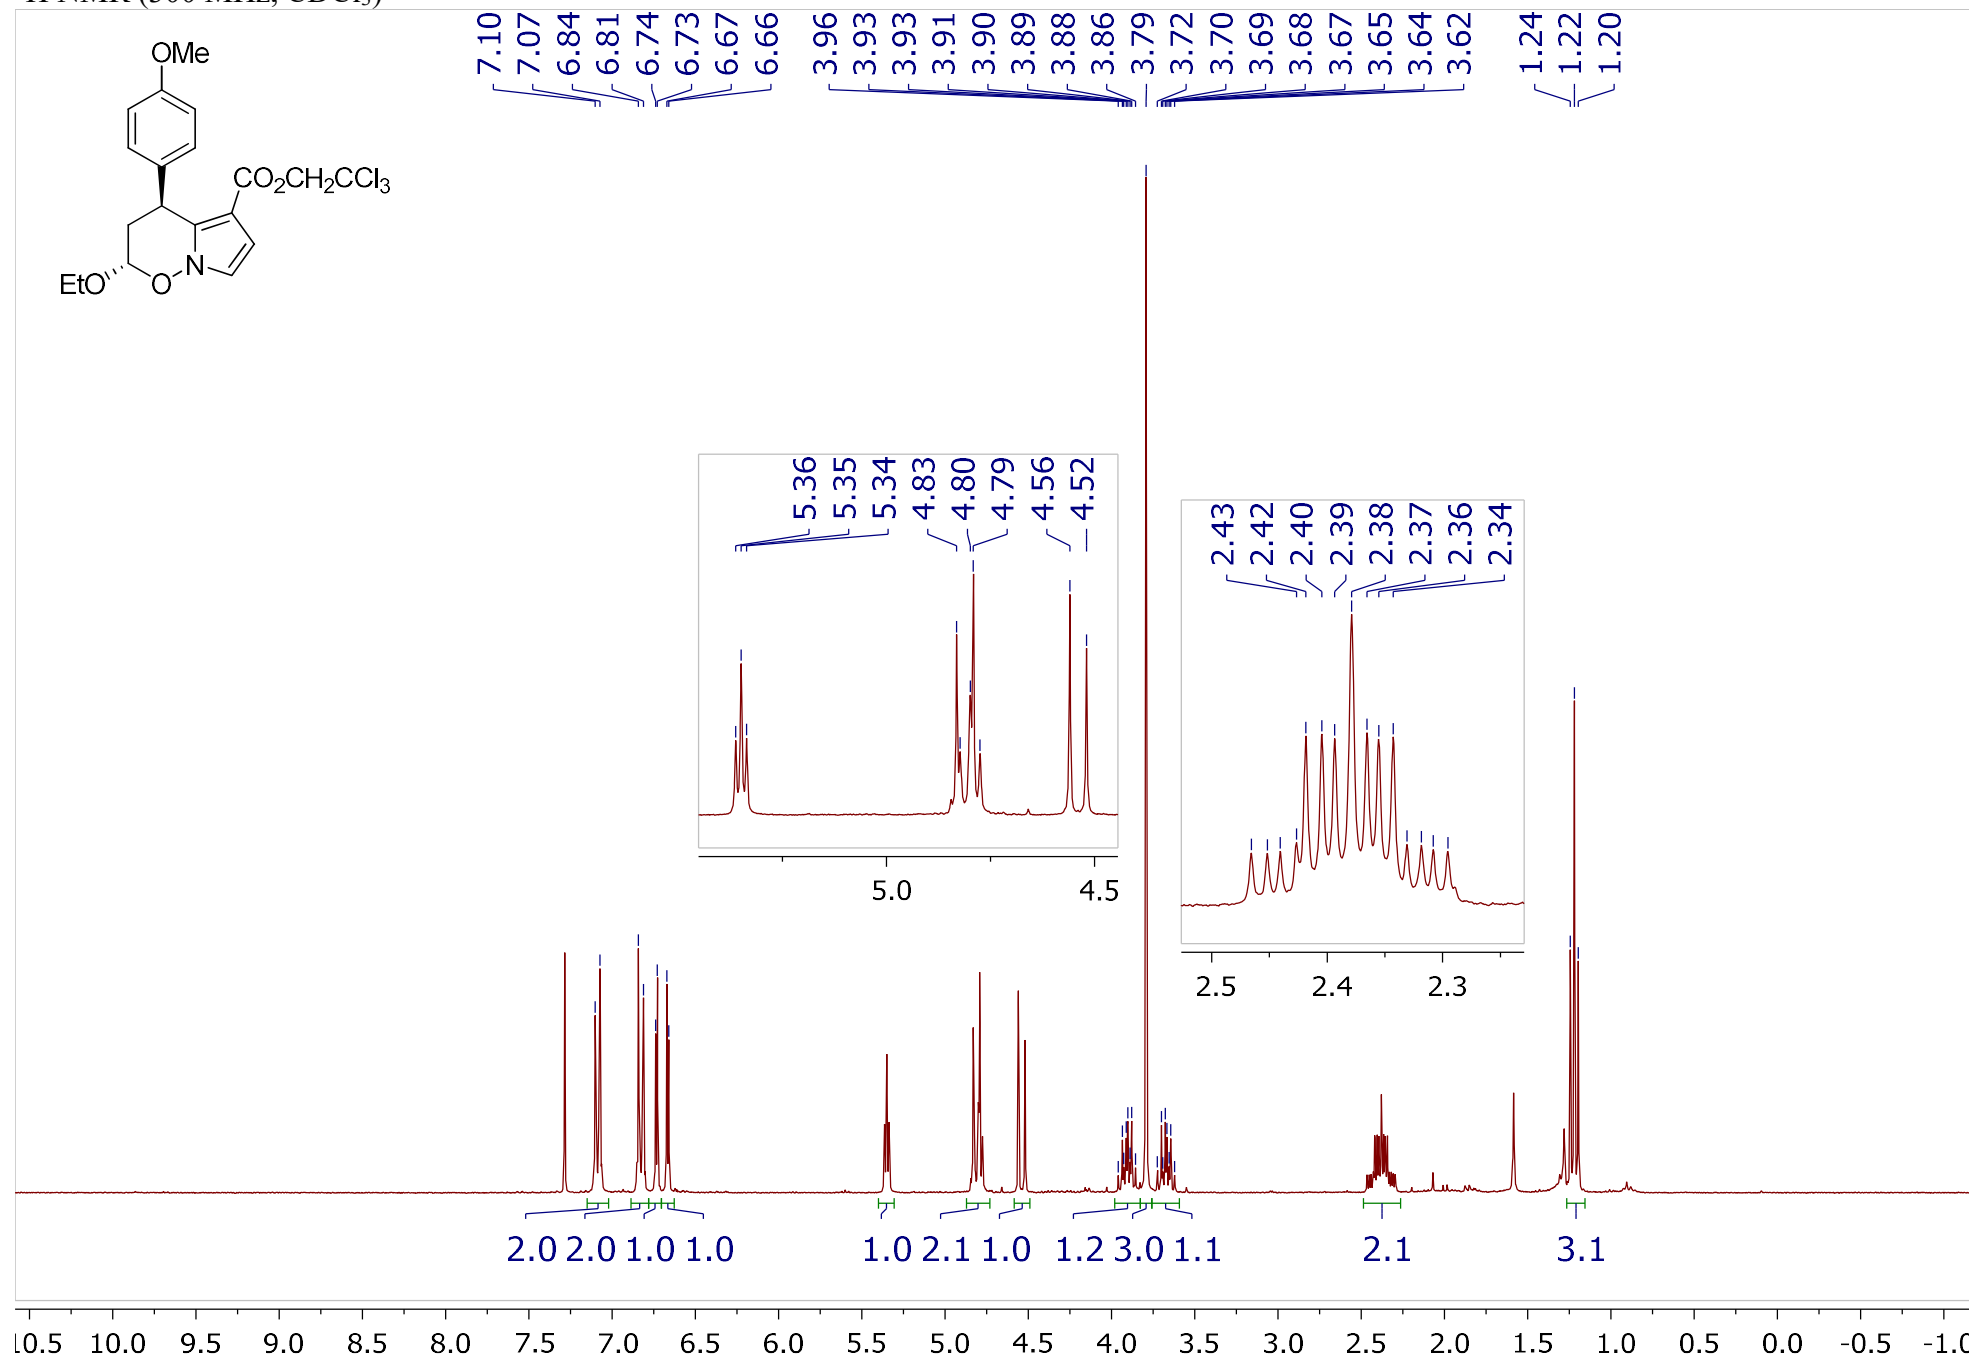

<sup>13</sup>C NMR (75 MHz, CDCl<sub>3</sub>)

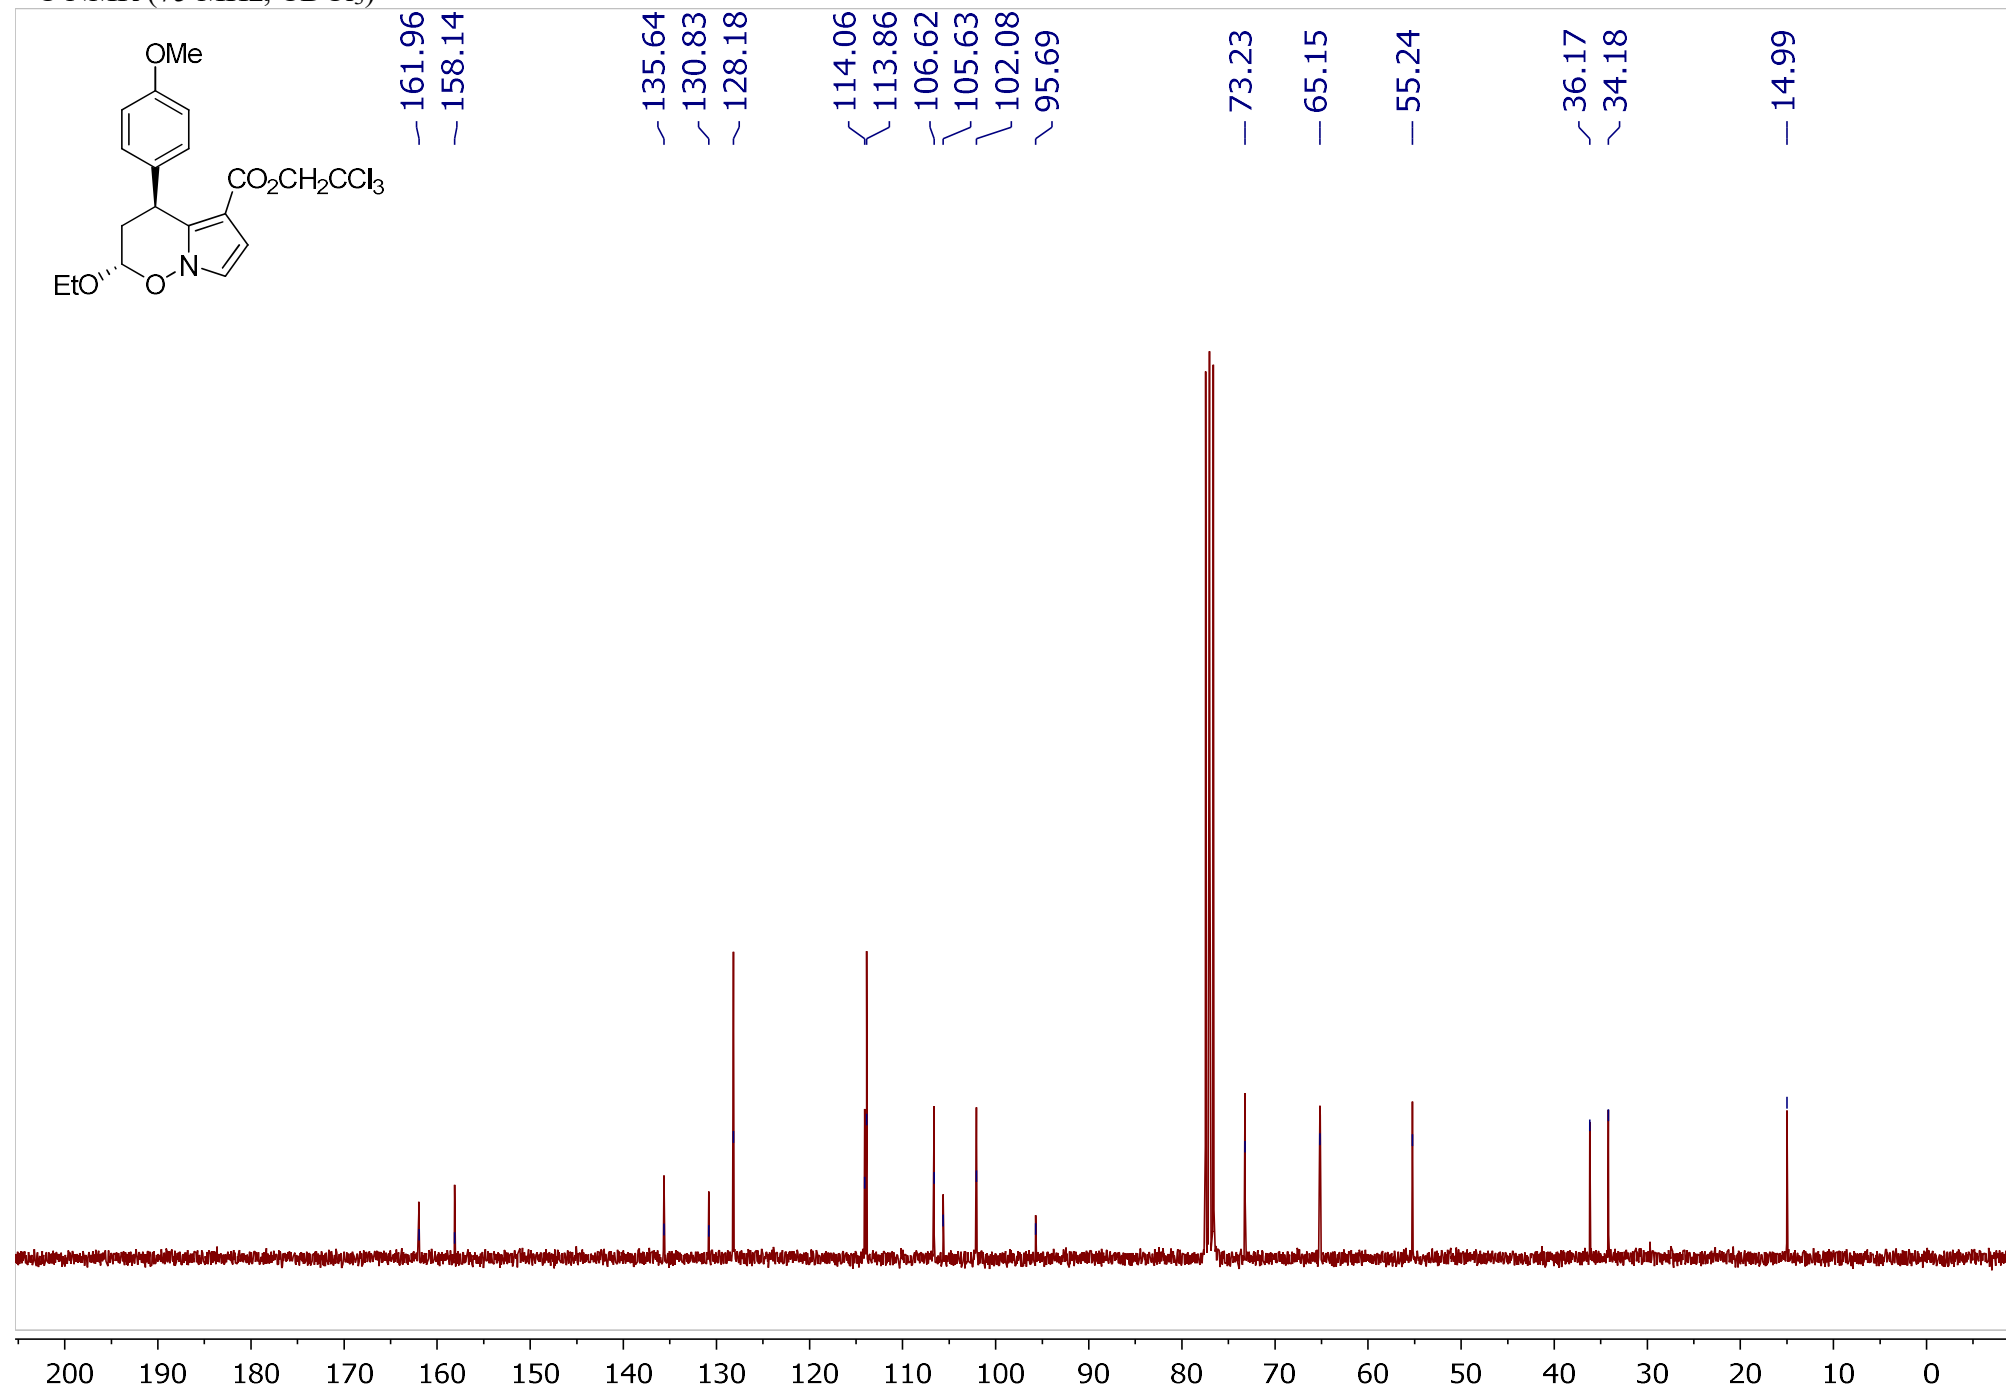

<sup>13</sup>C DEPT 135 (75 MHz, CDCl<sub>3</sub>)

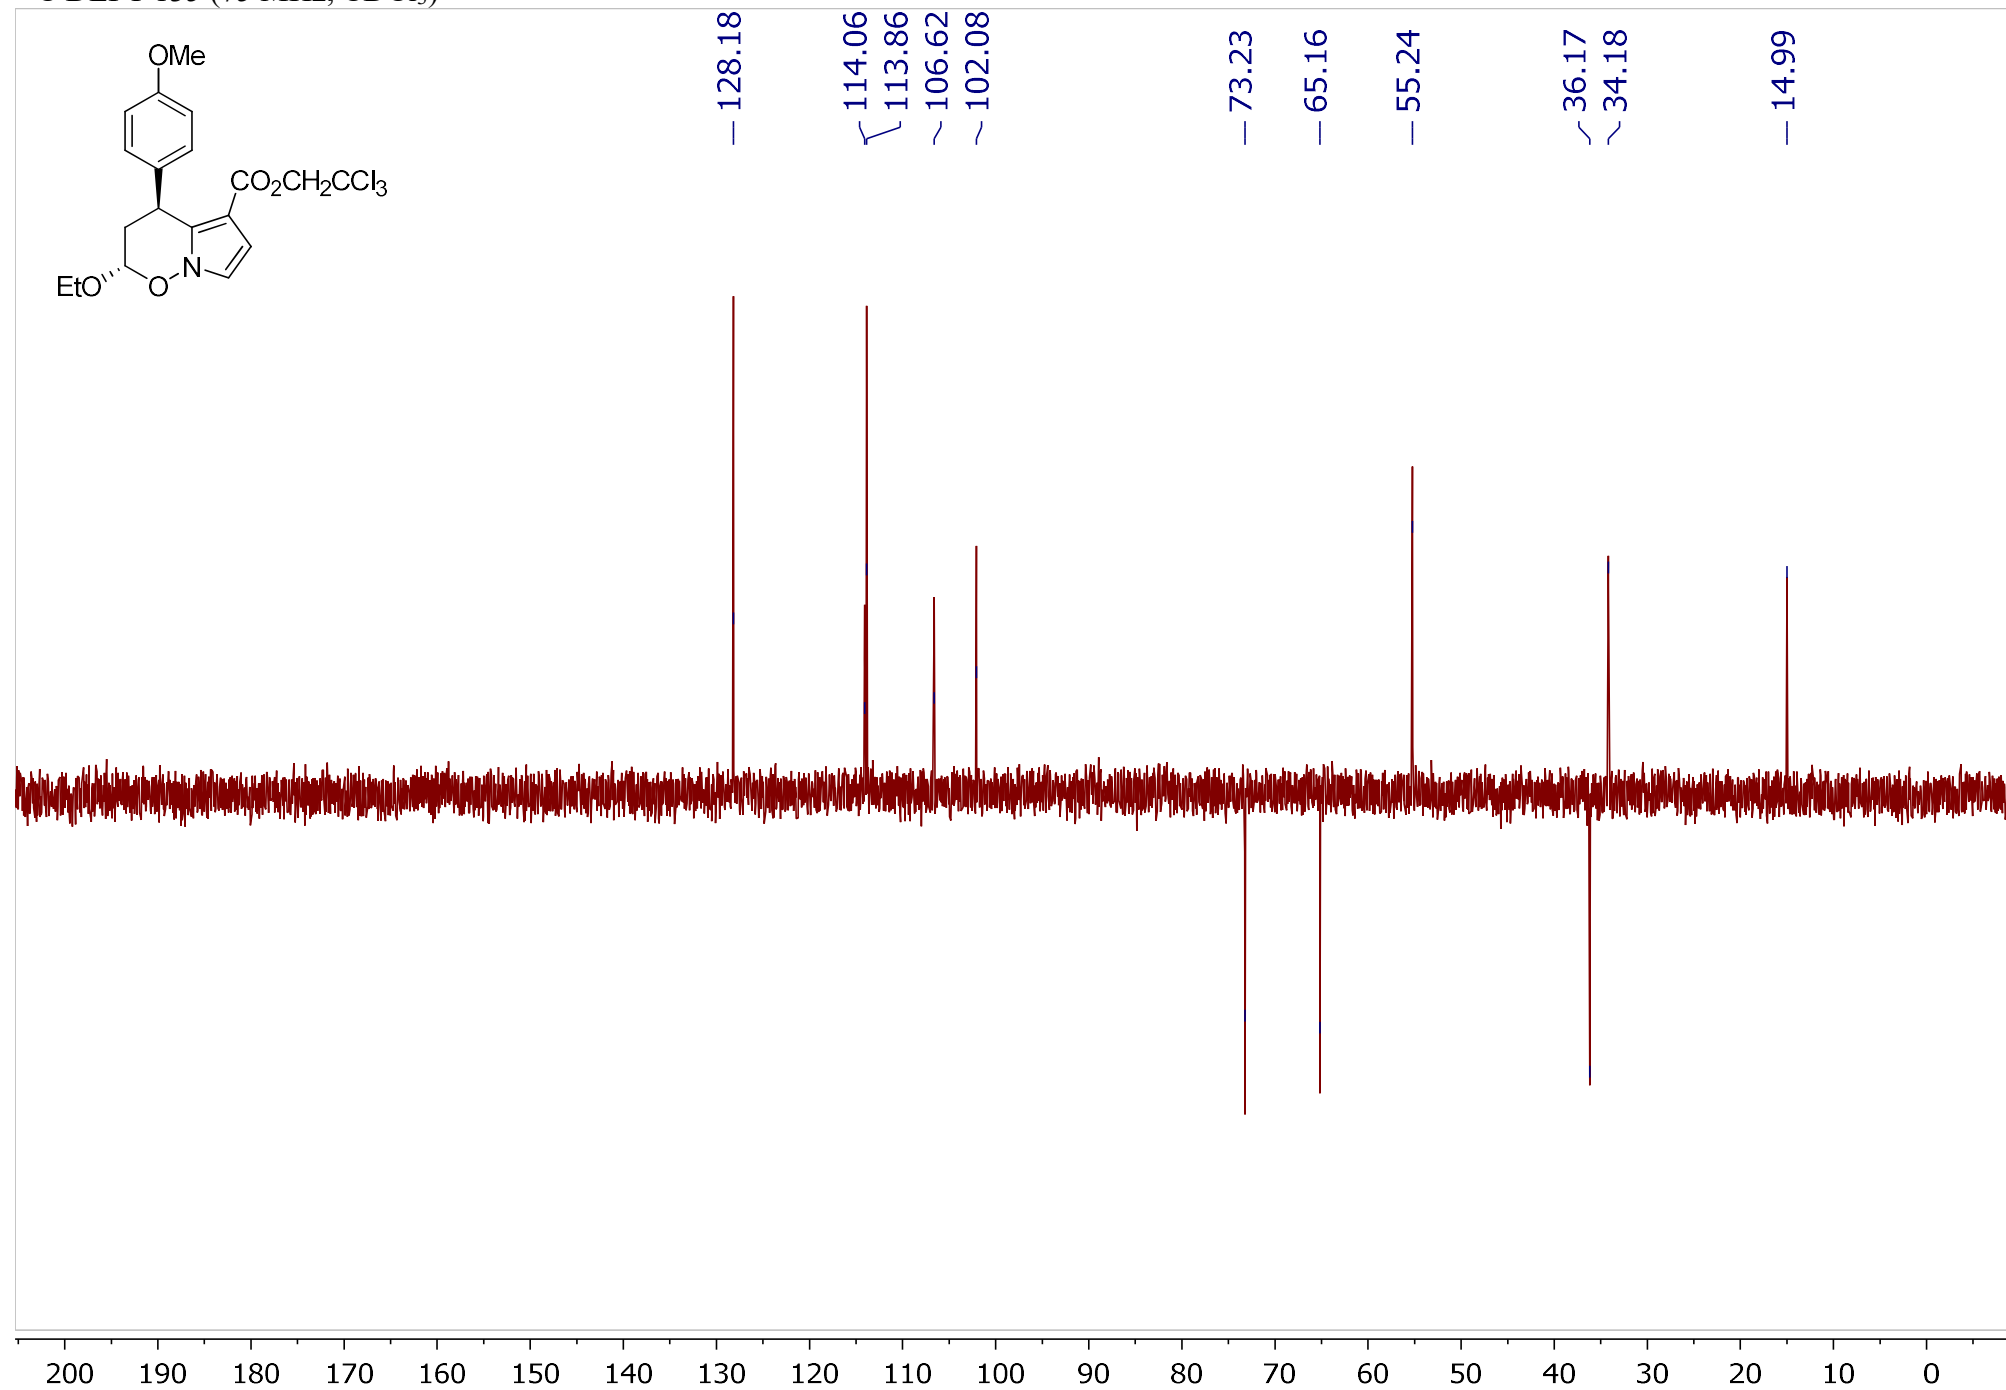

**Methyl 4-(4-methoxyphenyl)-2,2-dimethyl-3,4-dihydro-2H-pyrrolo[1,2-b][1,2]oxazine-5-carboxylate 4b**

$^1\text{H}$  NMR (300 MHz,  $\text{CDCl}_3$ )

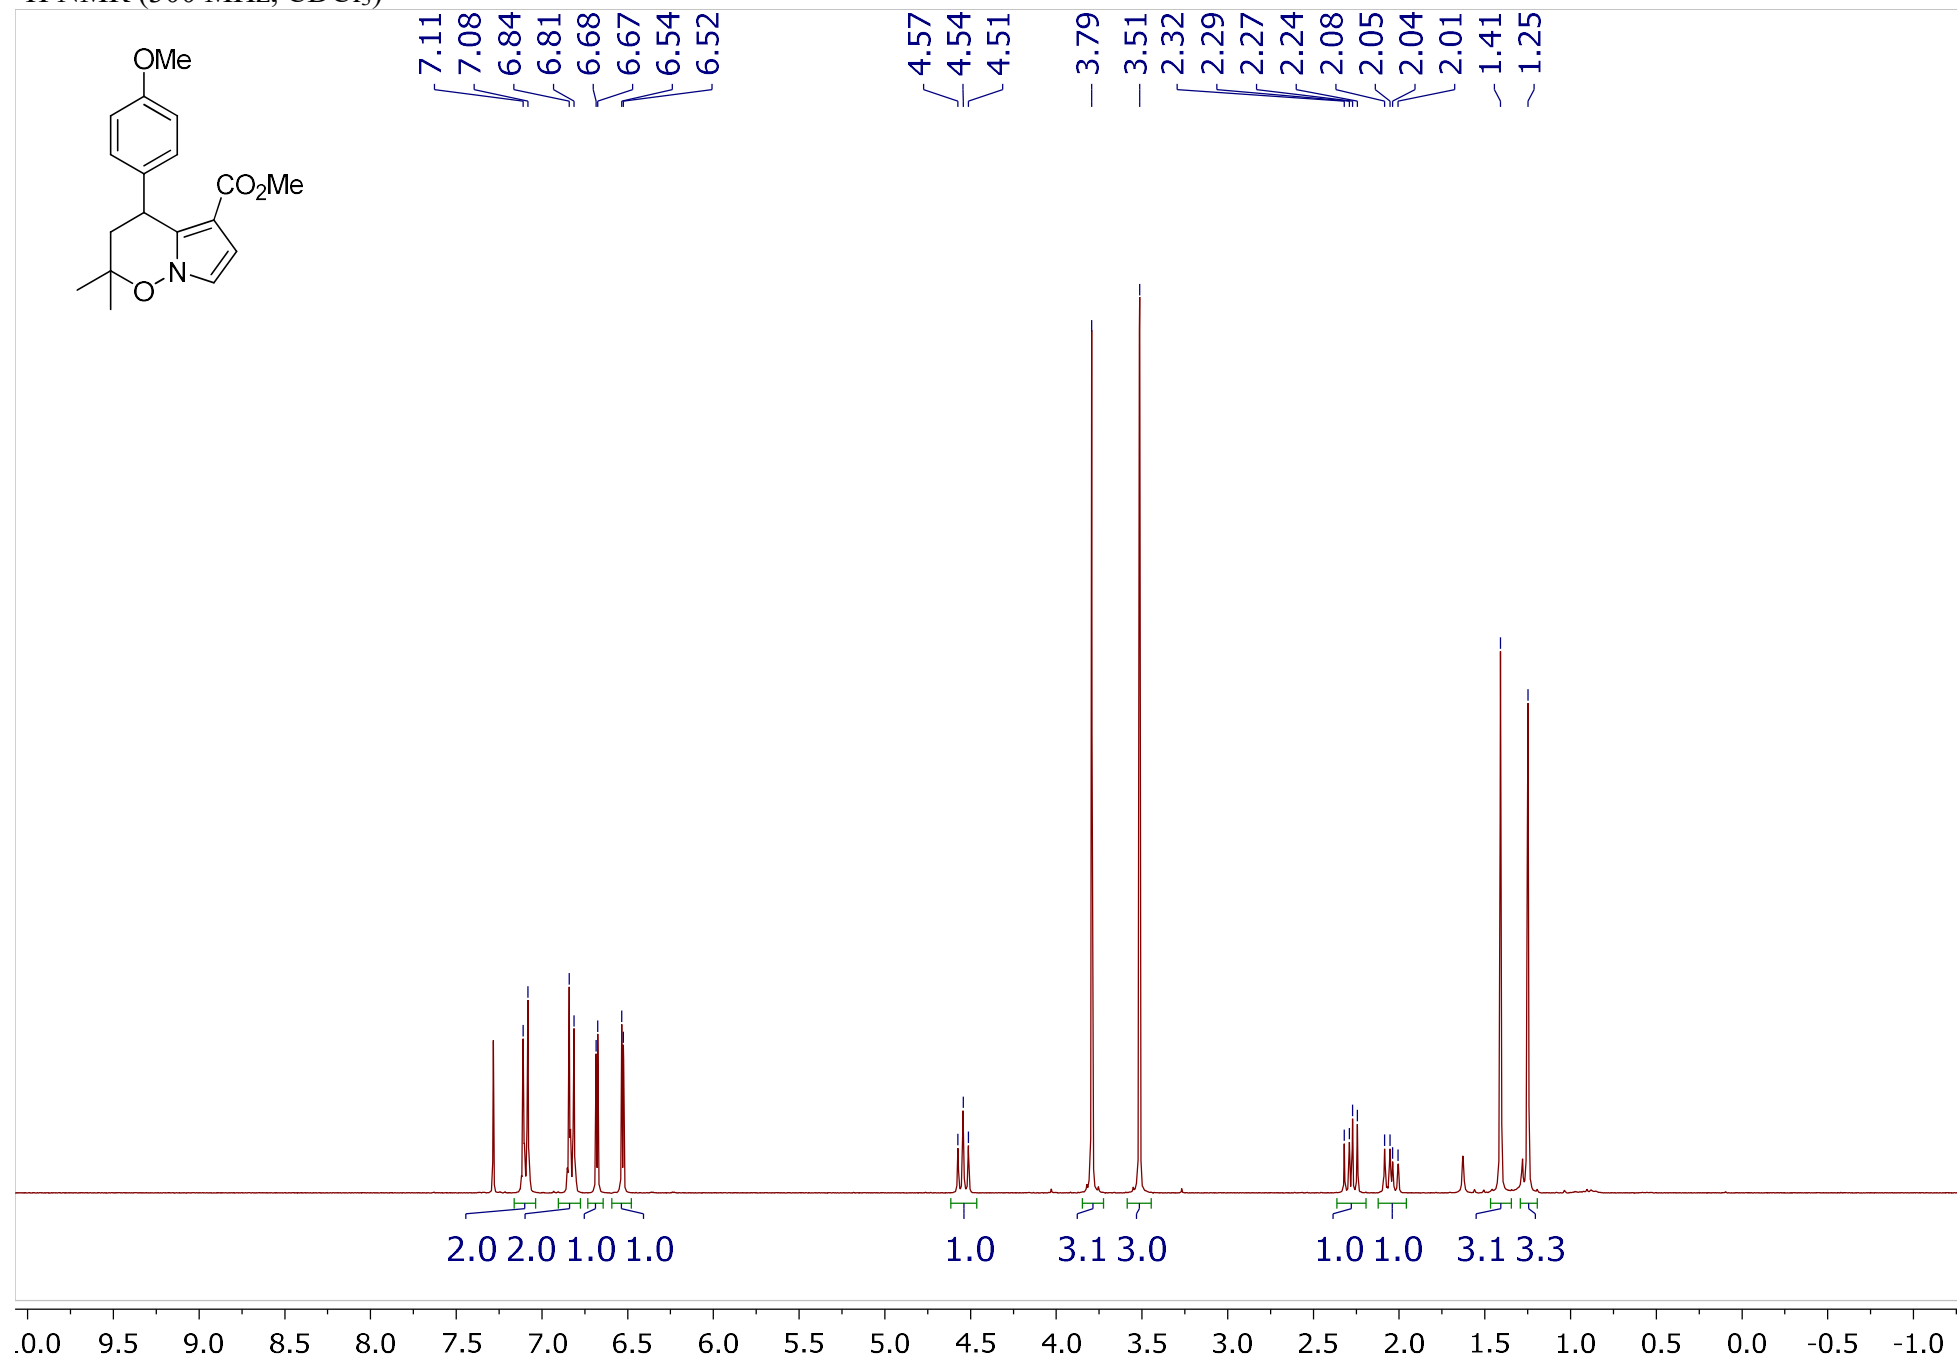



$^{13}\text{C}$  NMR (75 MHz,  $\text{CDCl}_3$ )

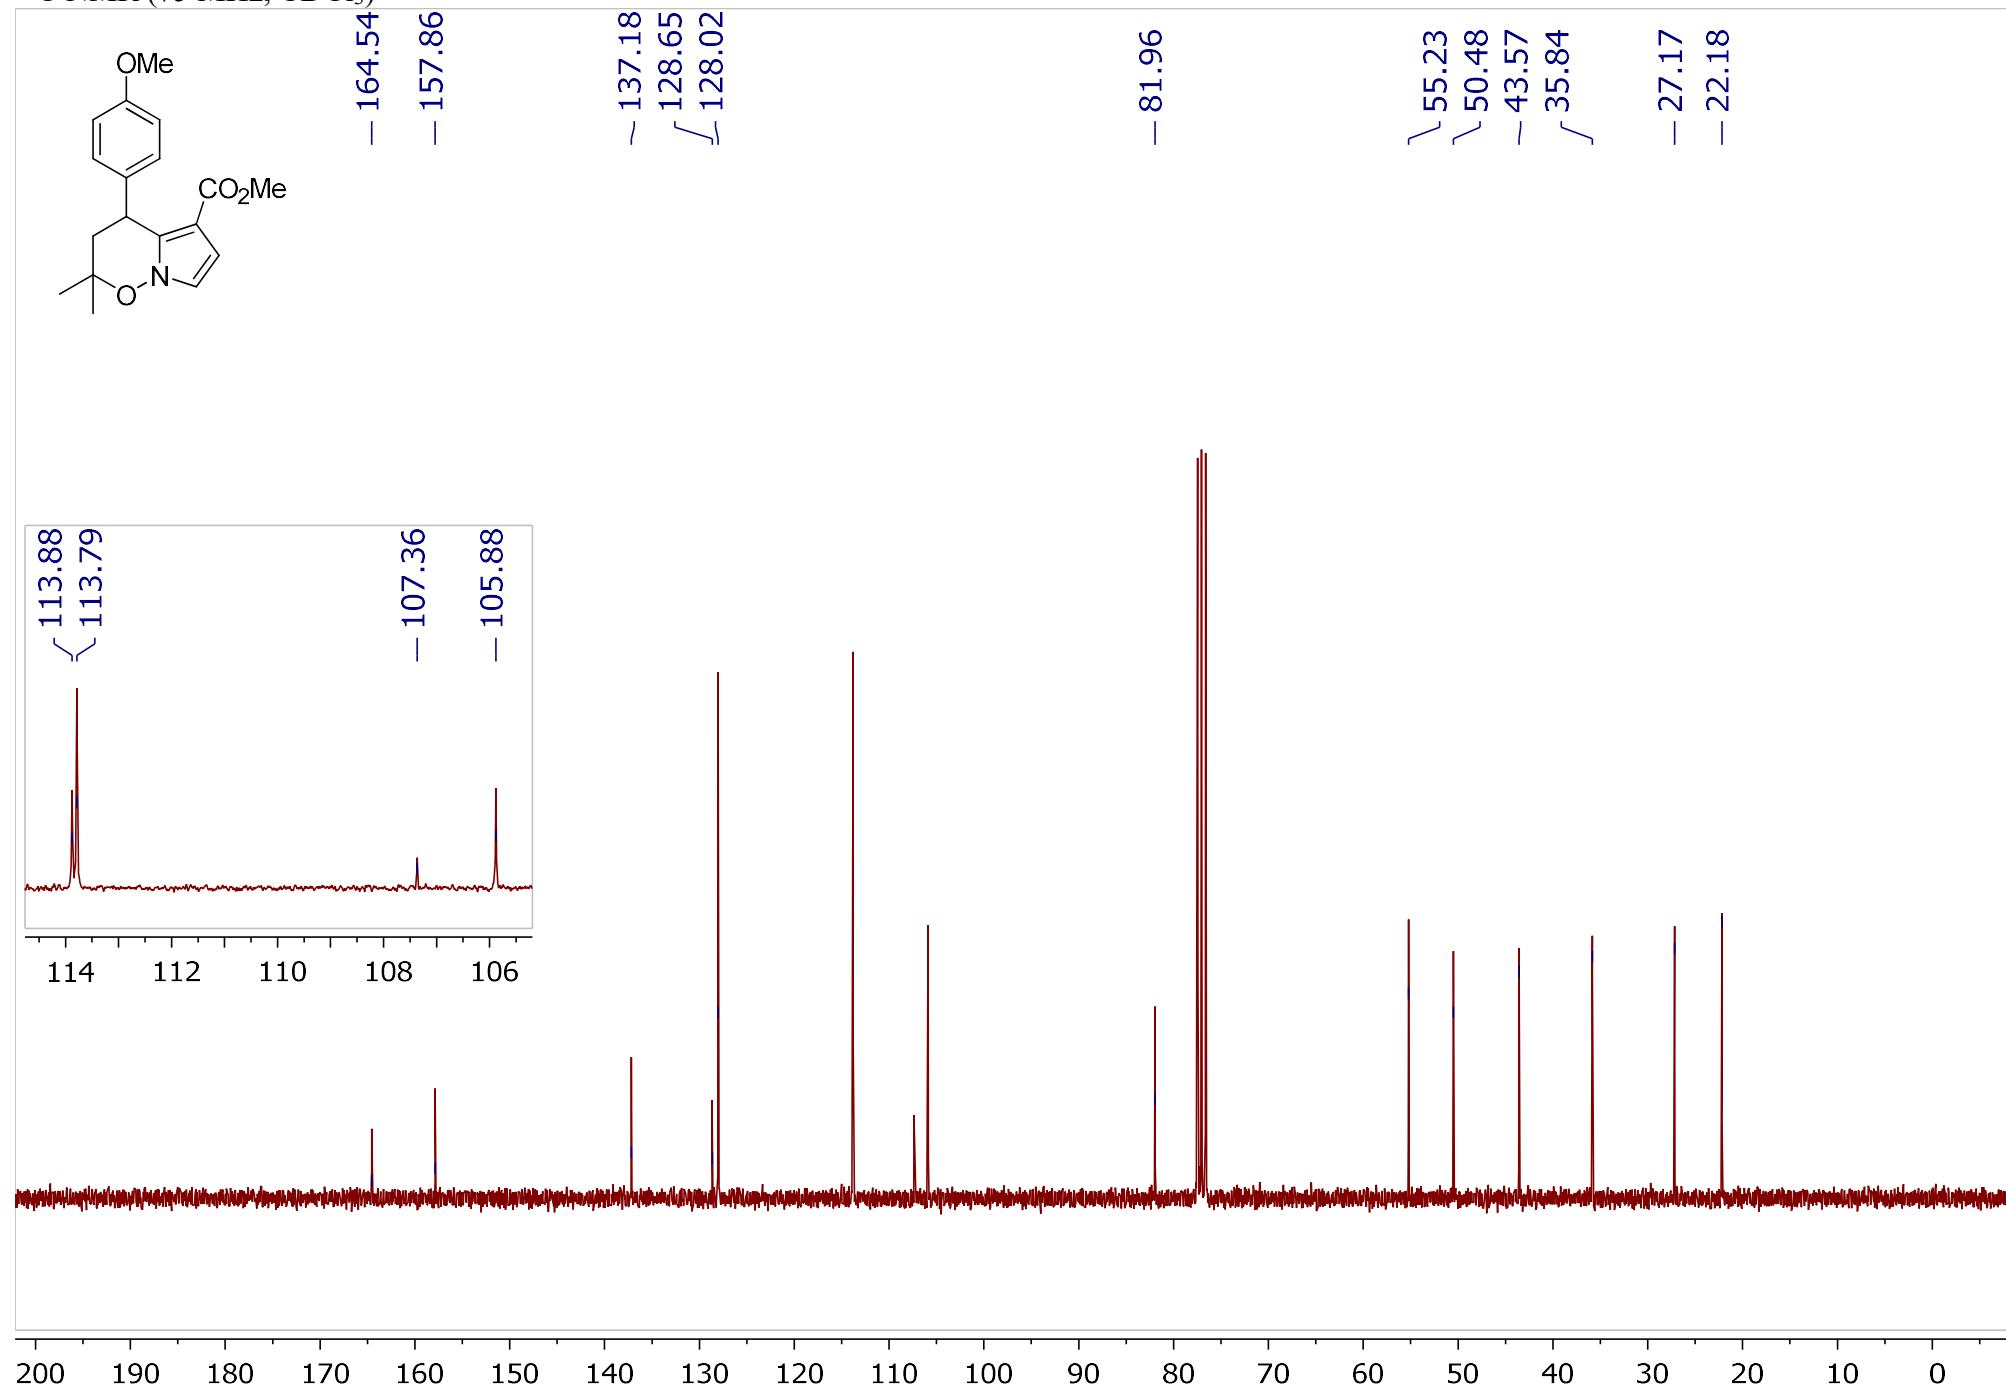

<sup>13</sup>C DEPT 135 (75 MHz, CDCl<sub>3</sub>)

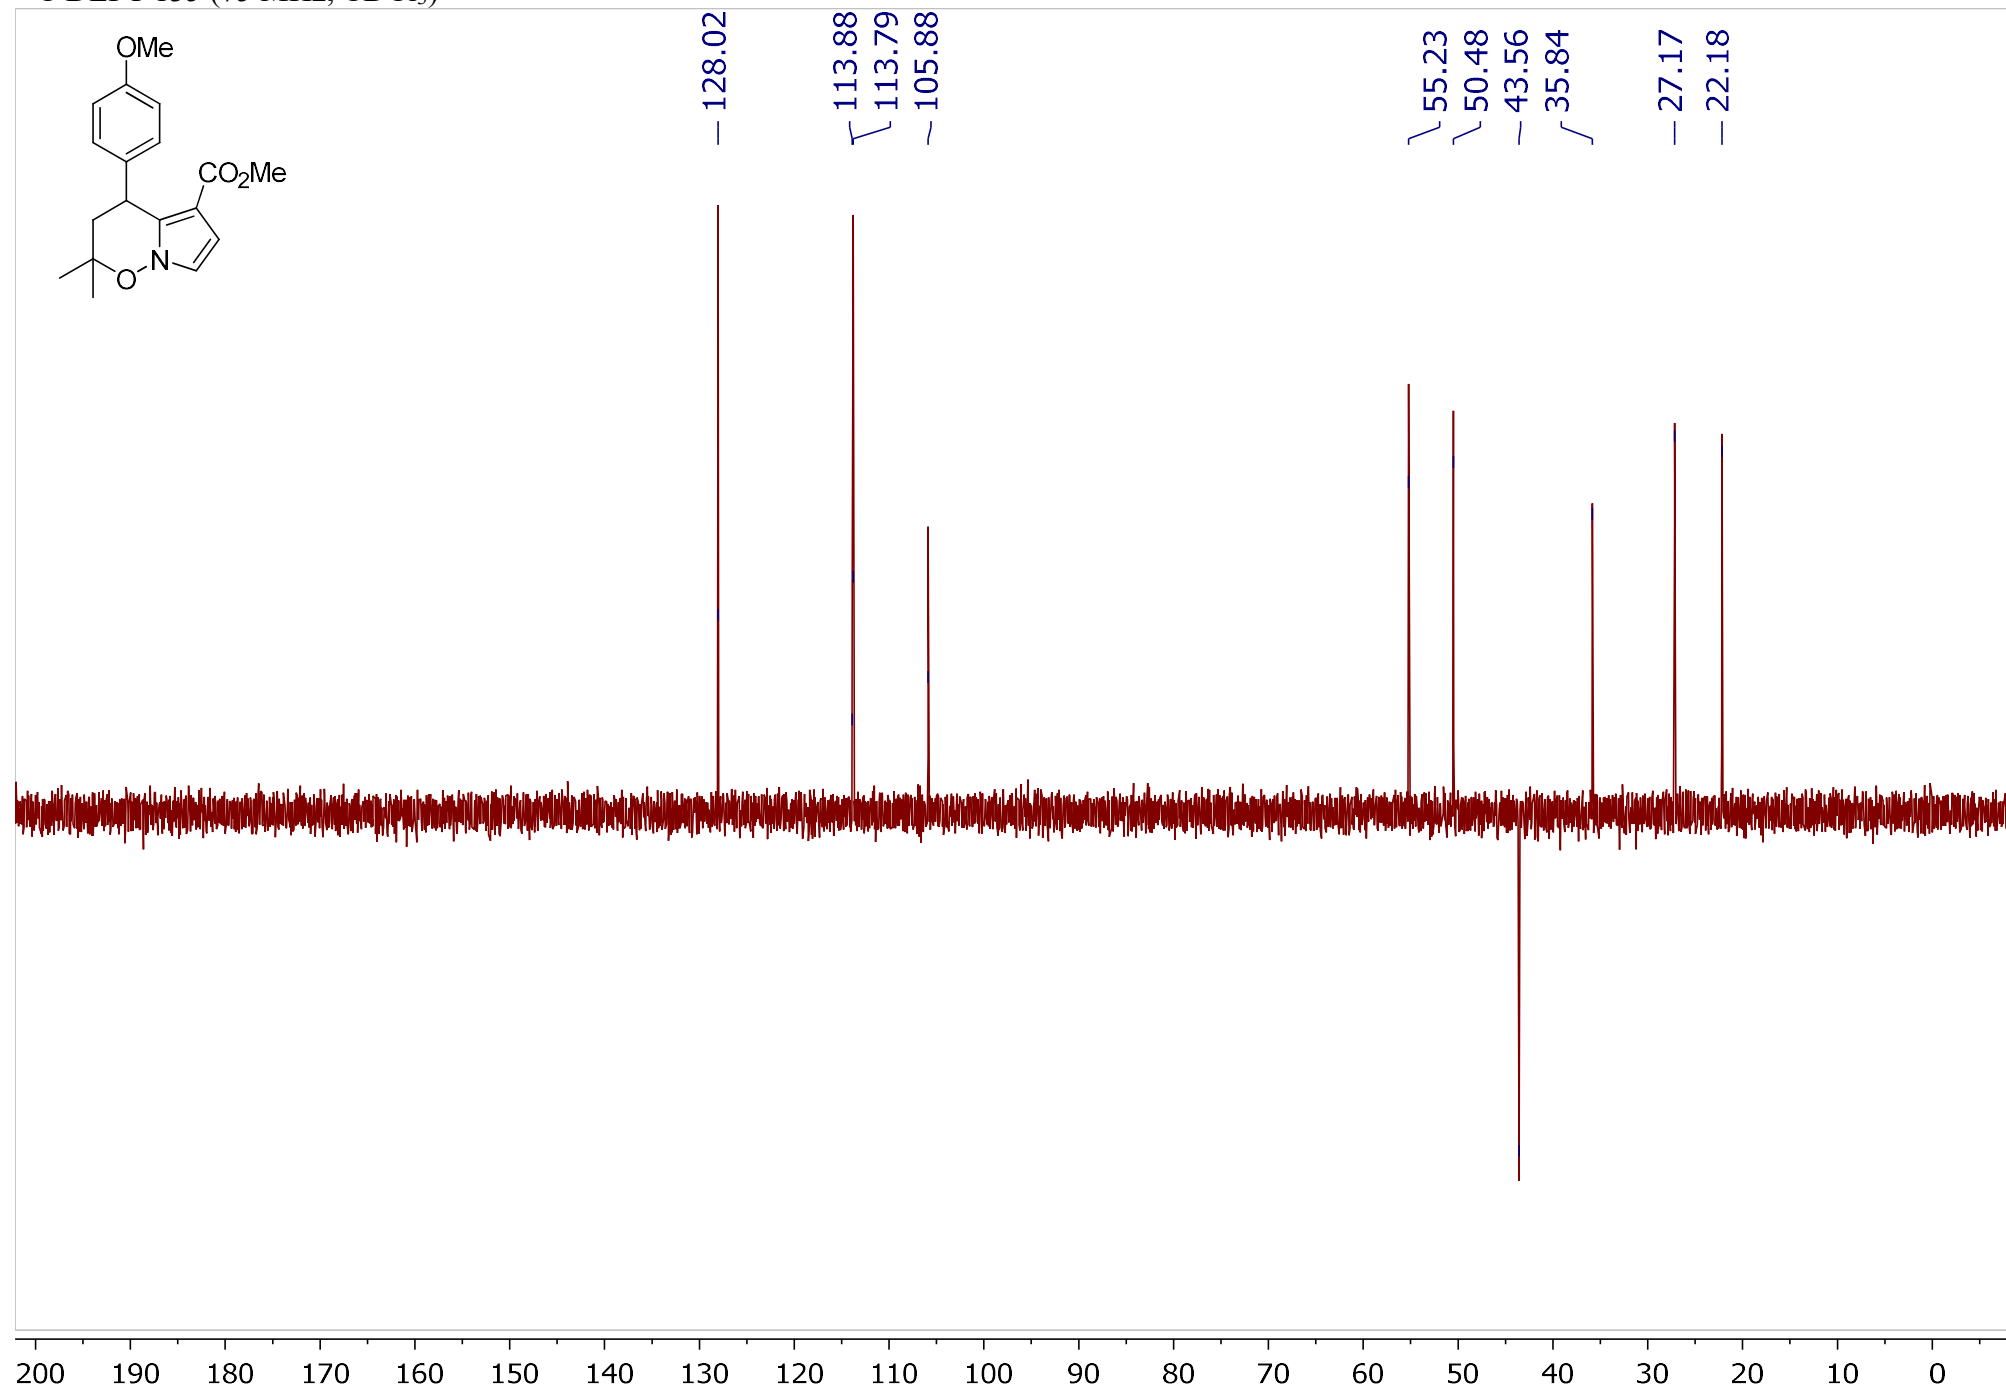

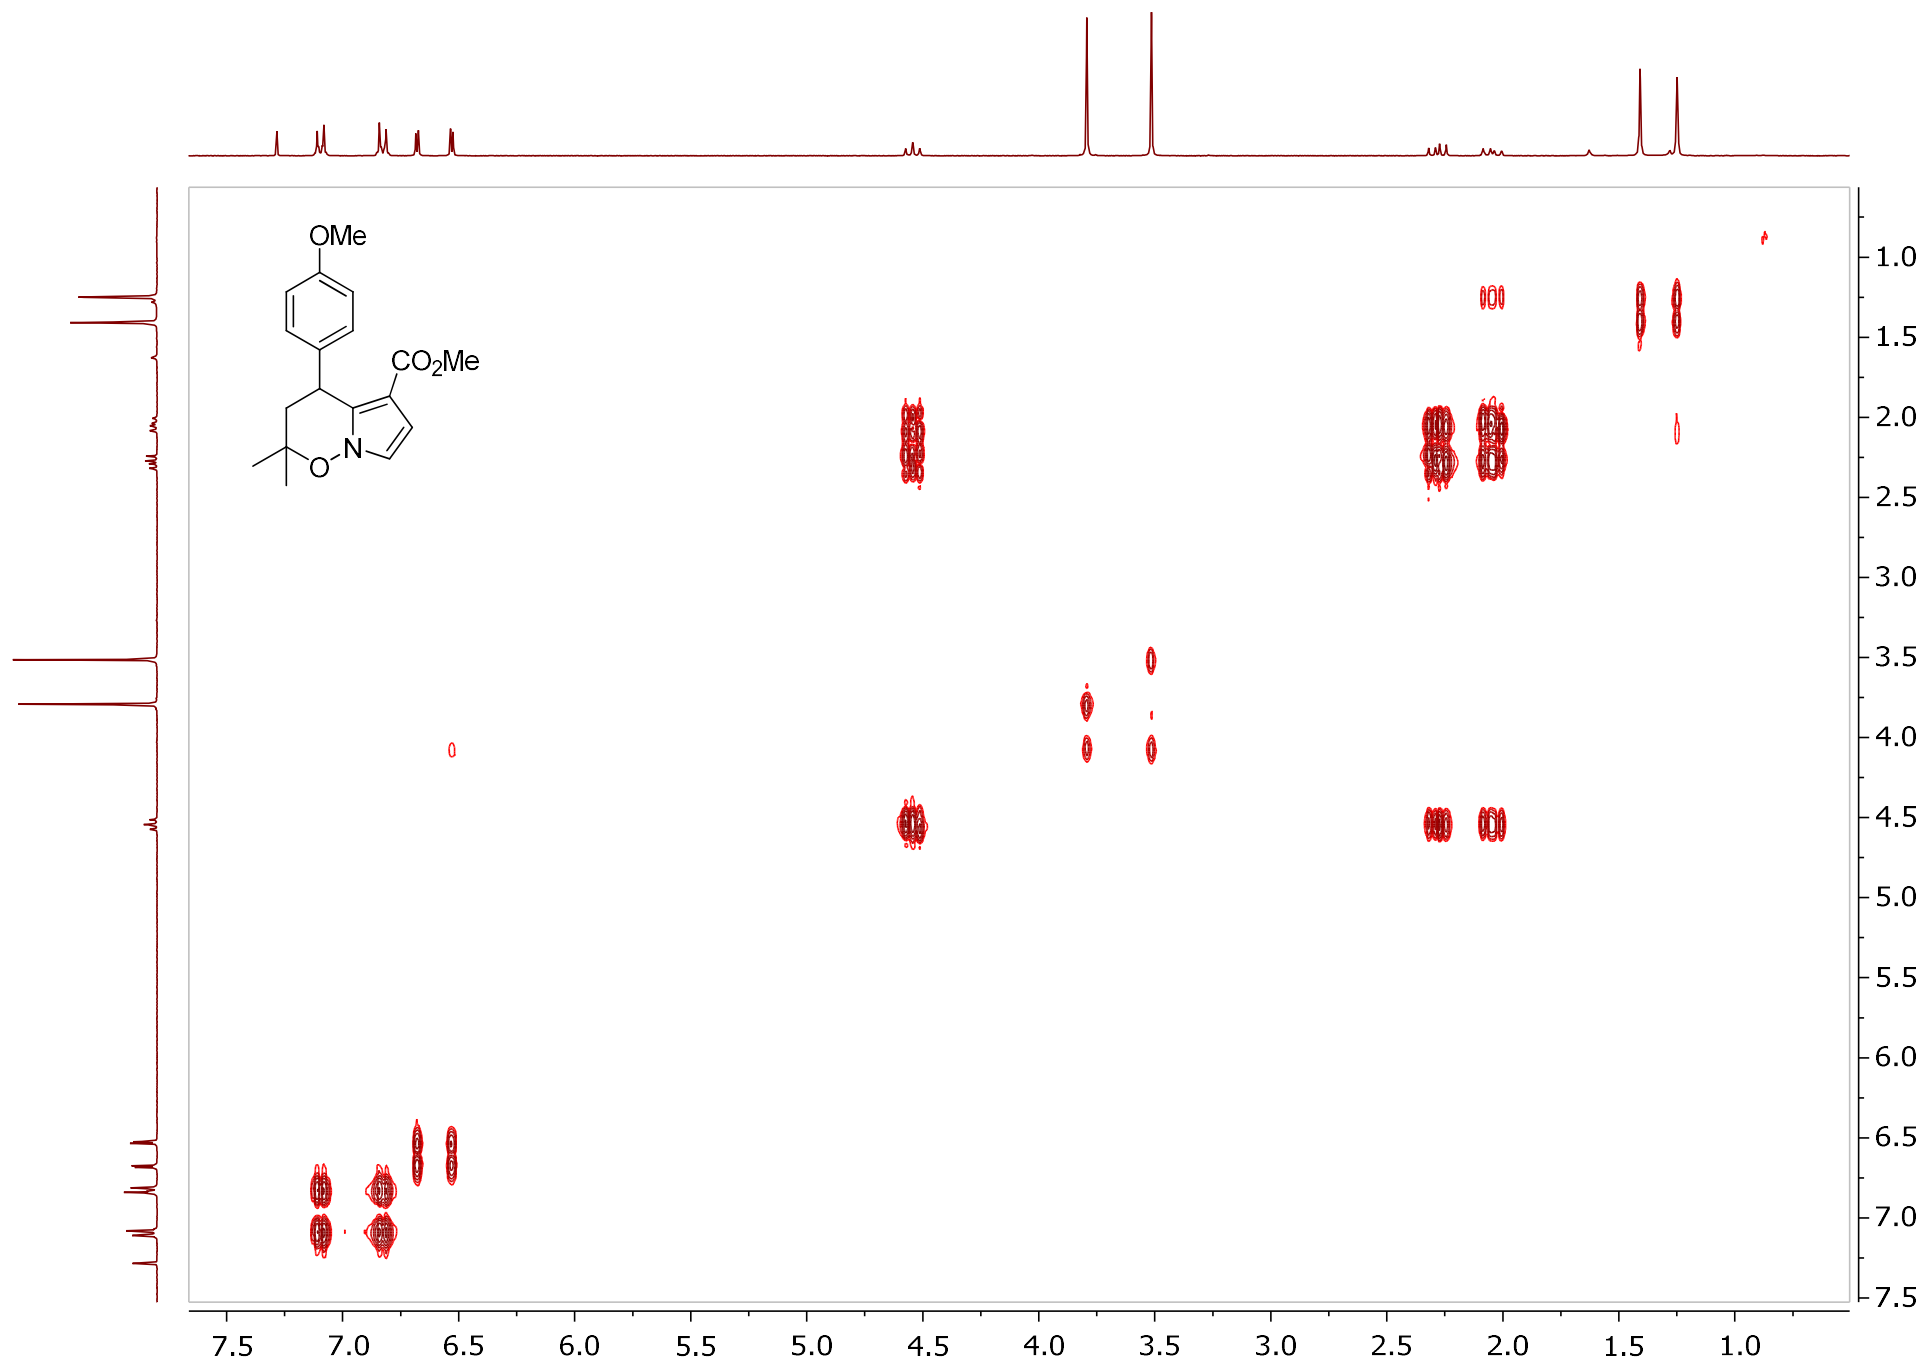

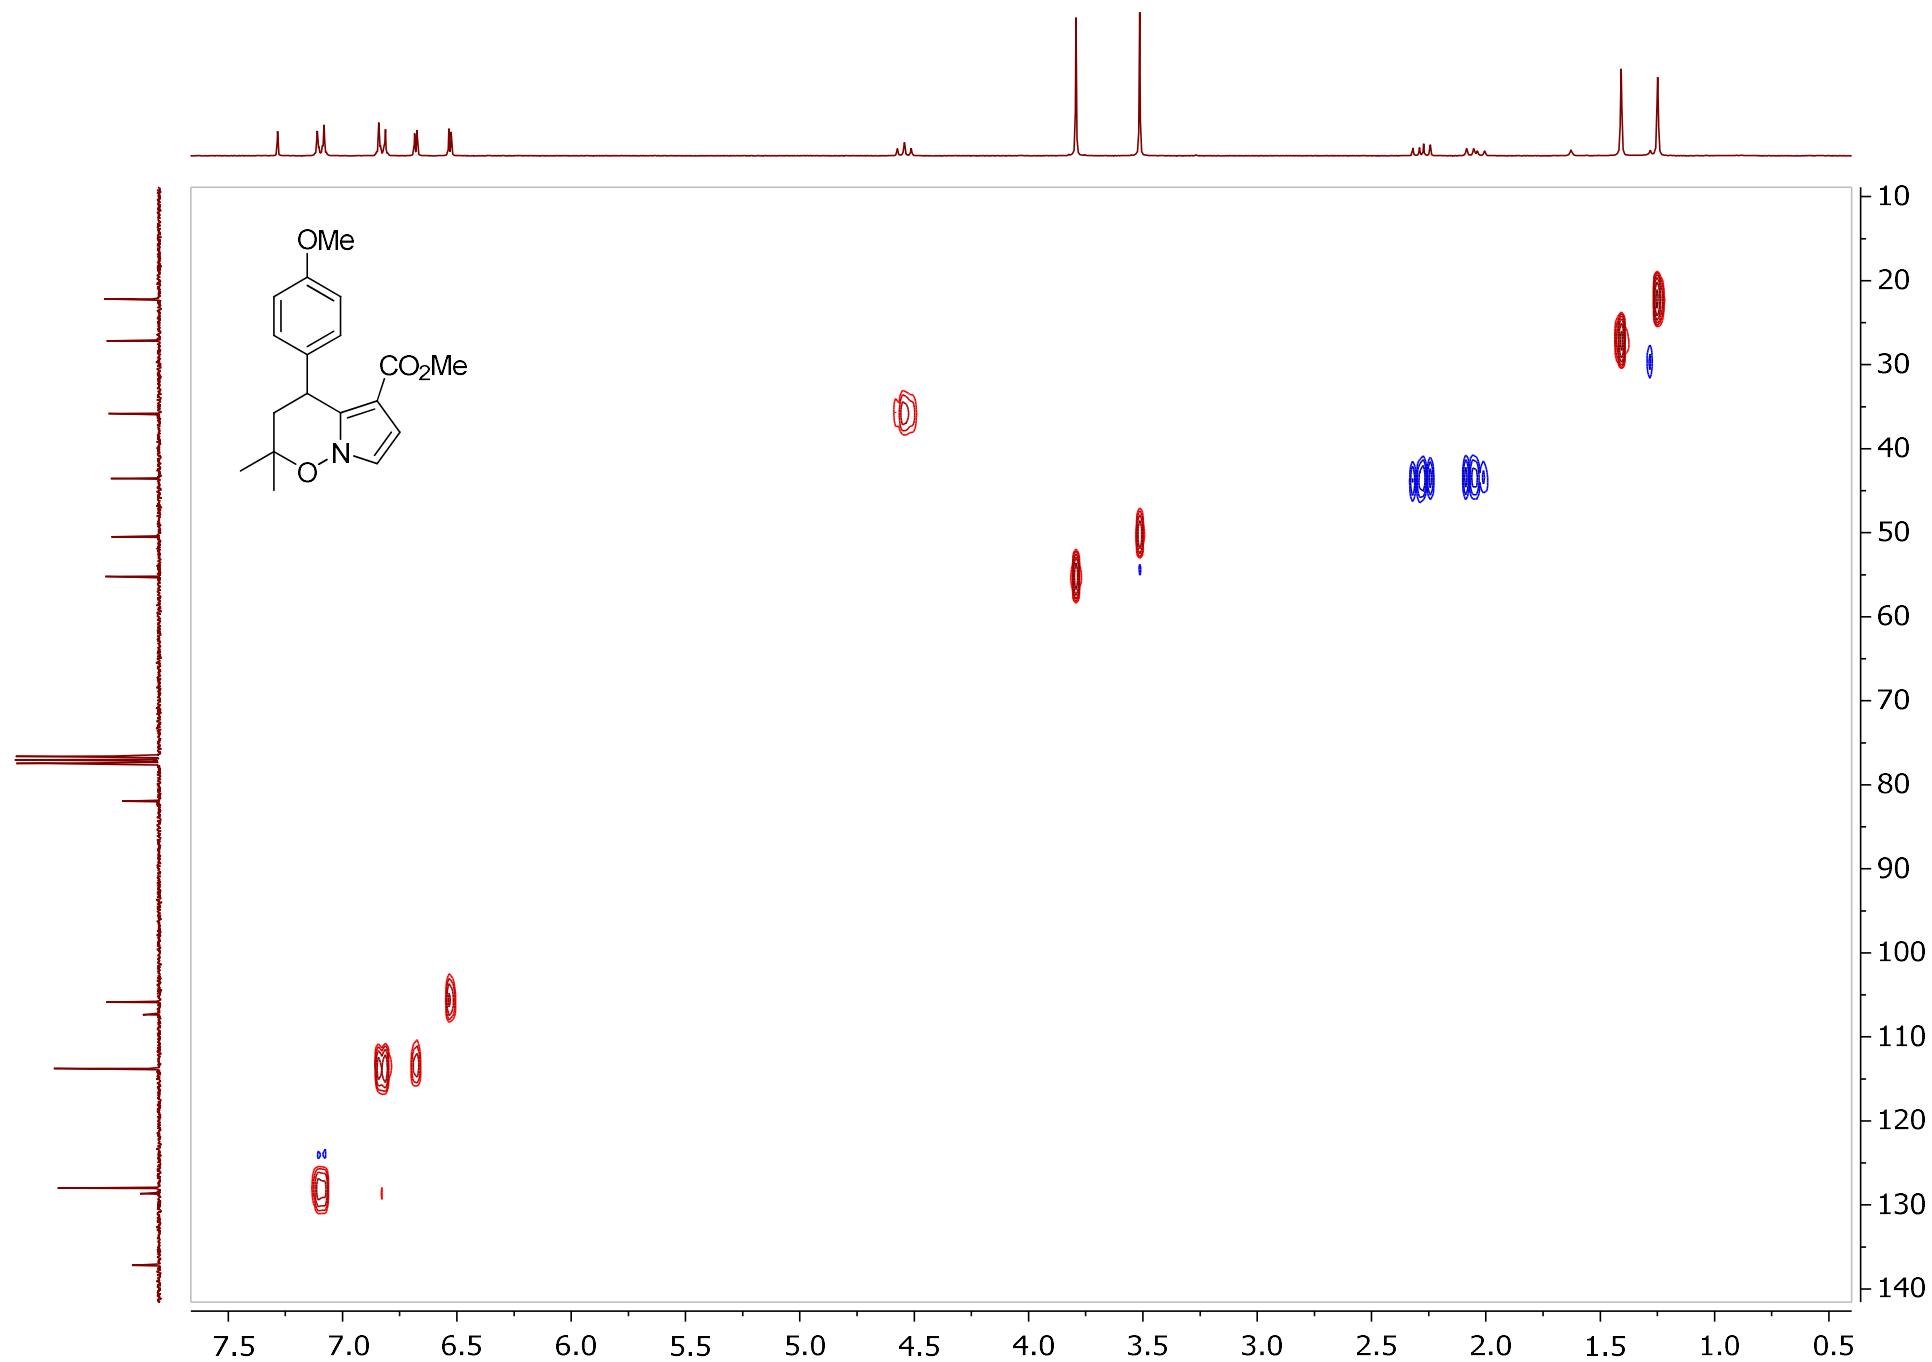

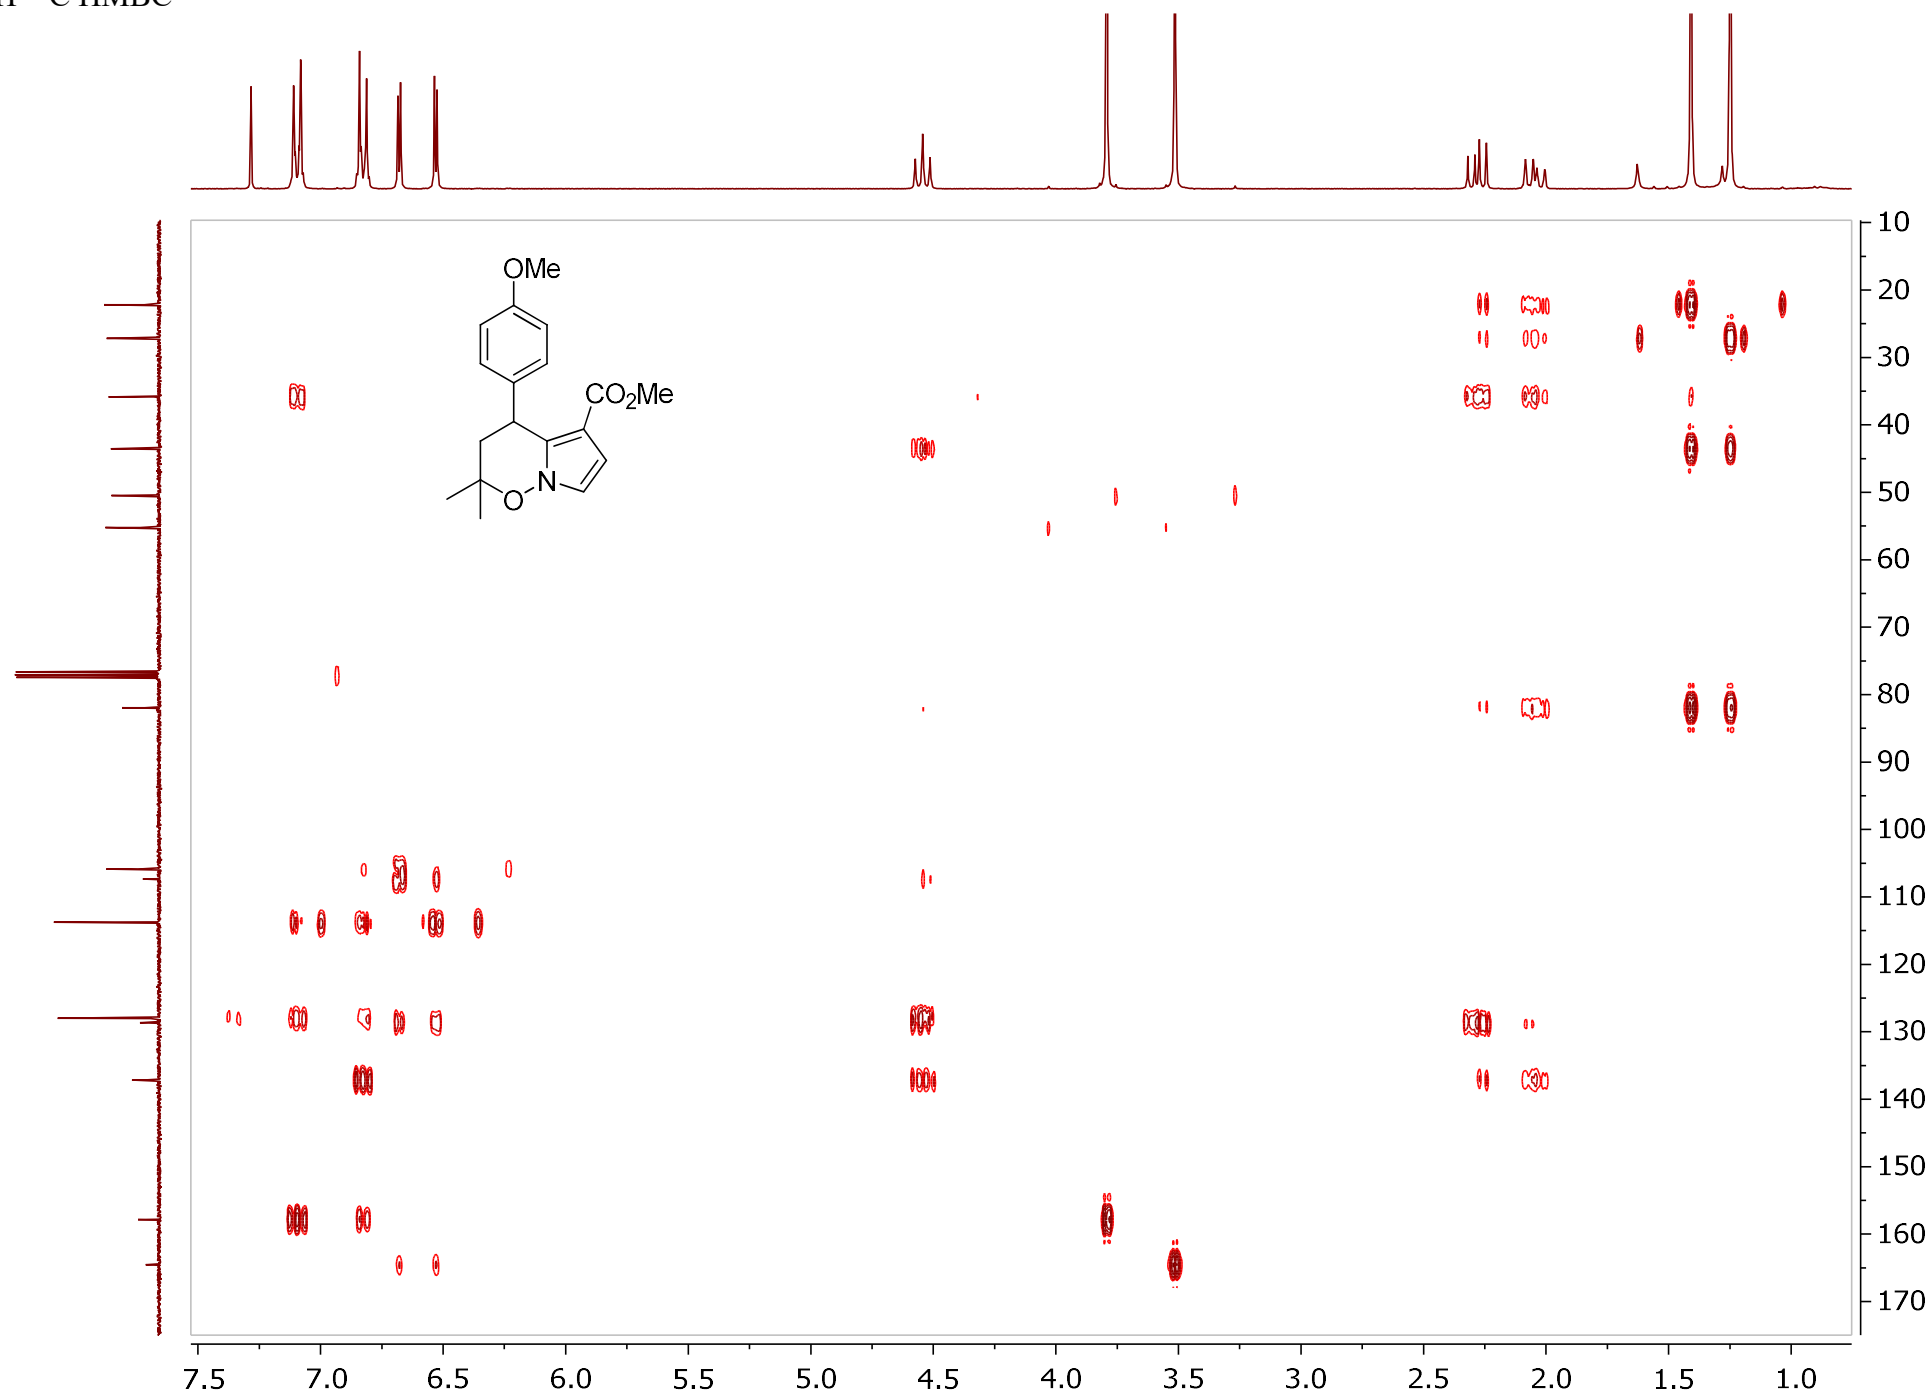

**4-(4-Methoxyphenyl)-2,2-dimethyl-3,4-dihydro-2H-pyrrolo[1,2-b][1,2]oxazine-5-carboxylic acid 5**

$^1\text{H}$  NMR (300 MHz,  $\text{CDCl}_3$ )

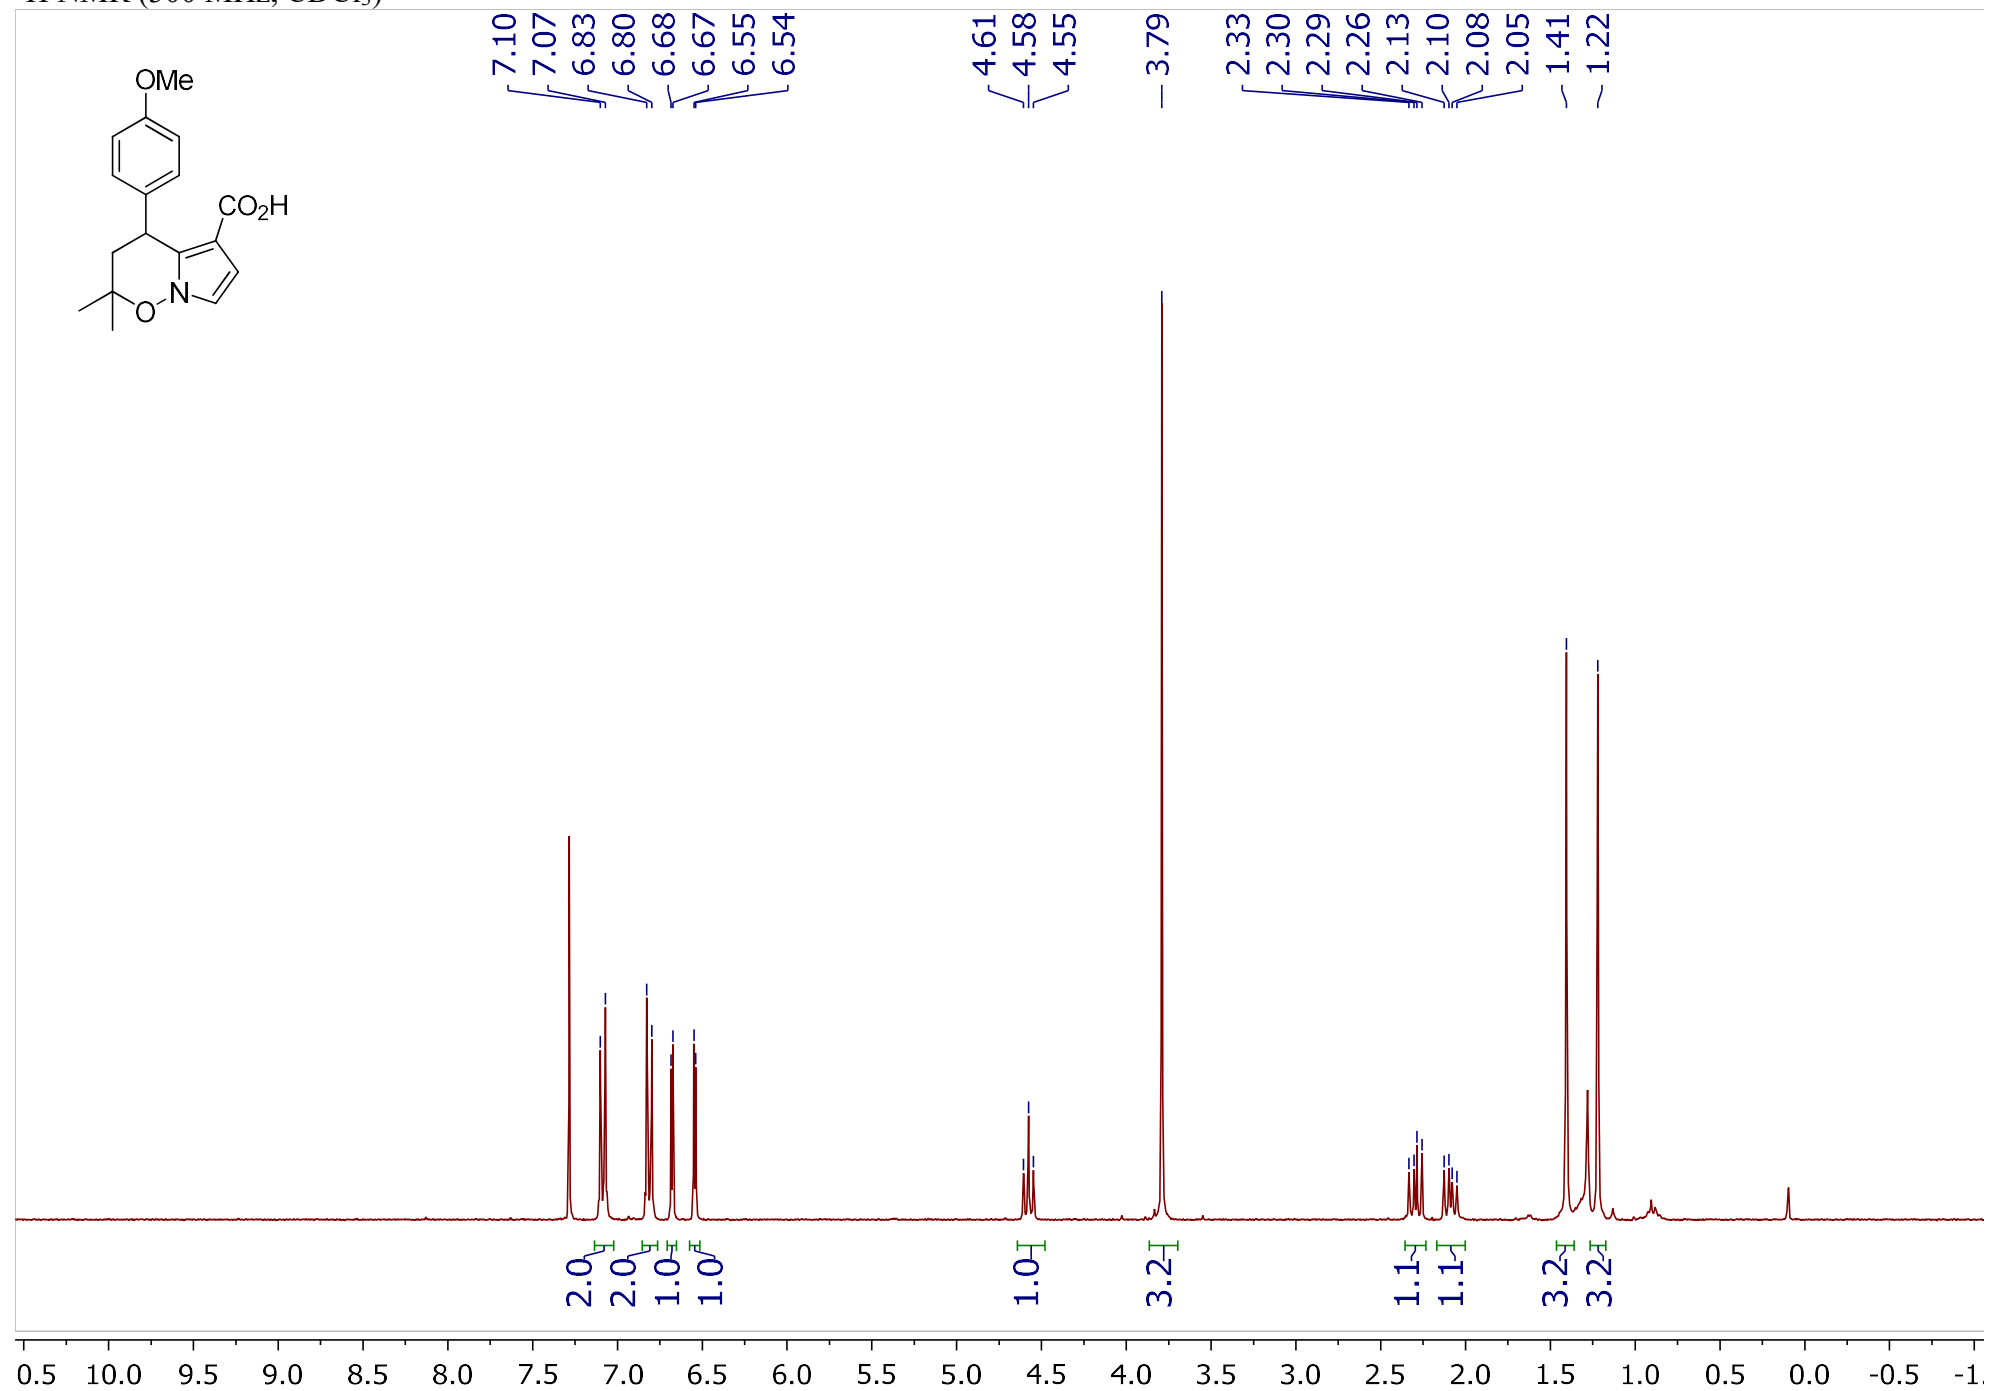

<sup>13</sup>C NMR (75 MHz, CDCl<sub>3</sub>)

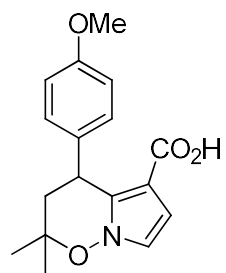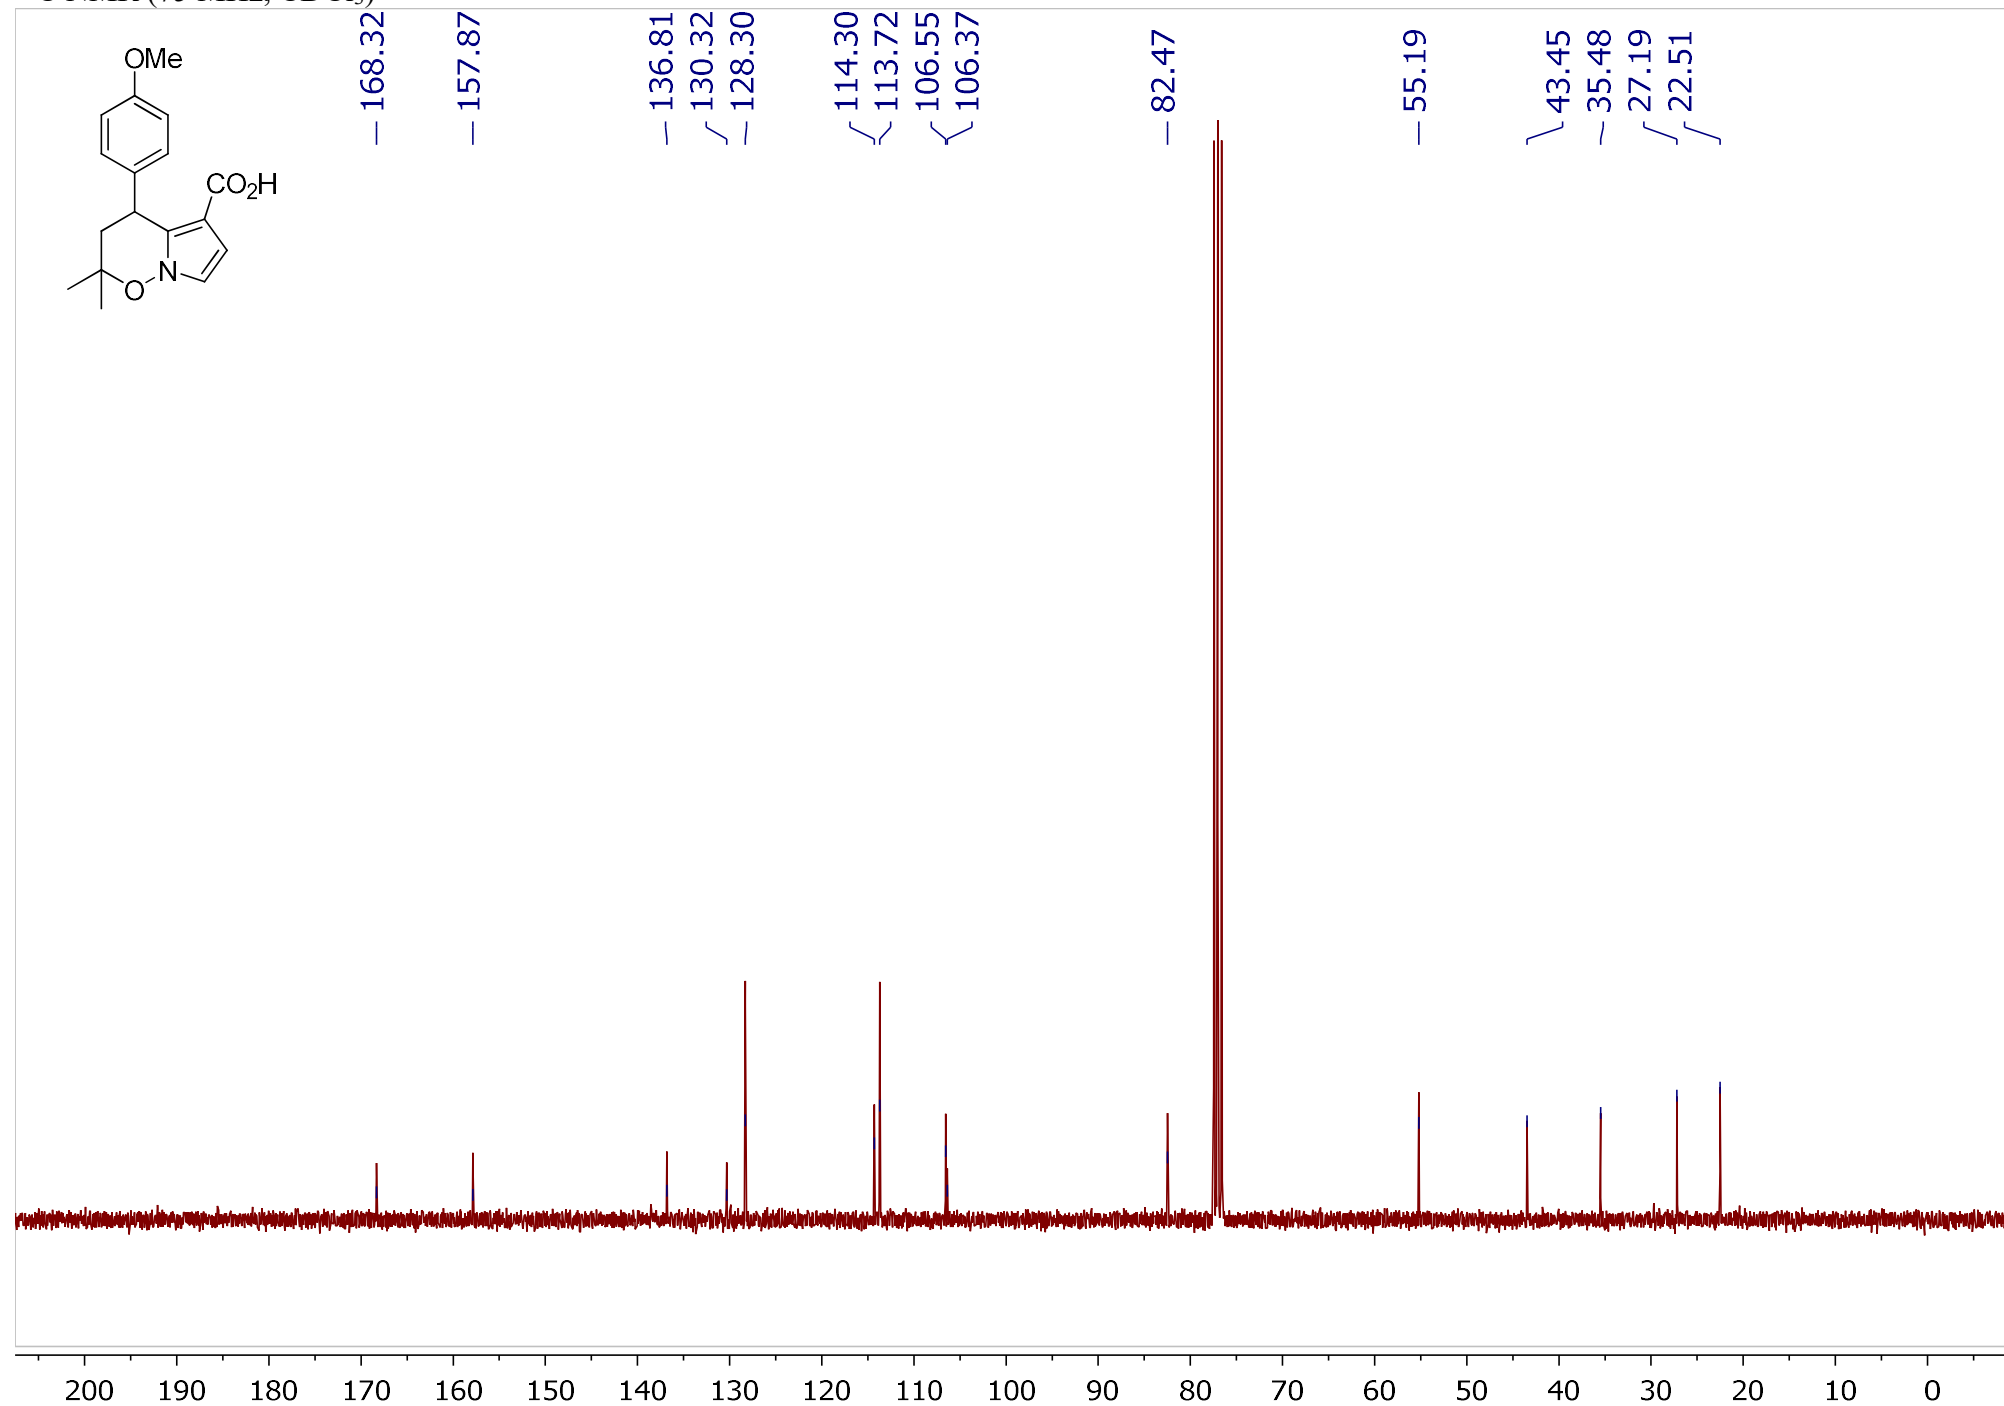

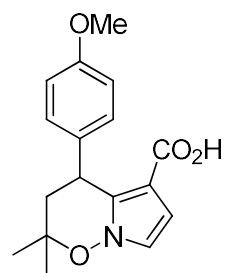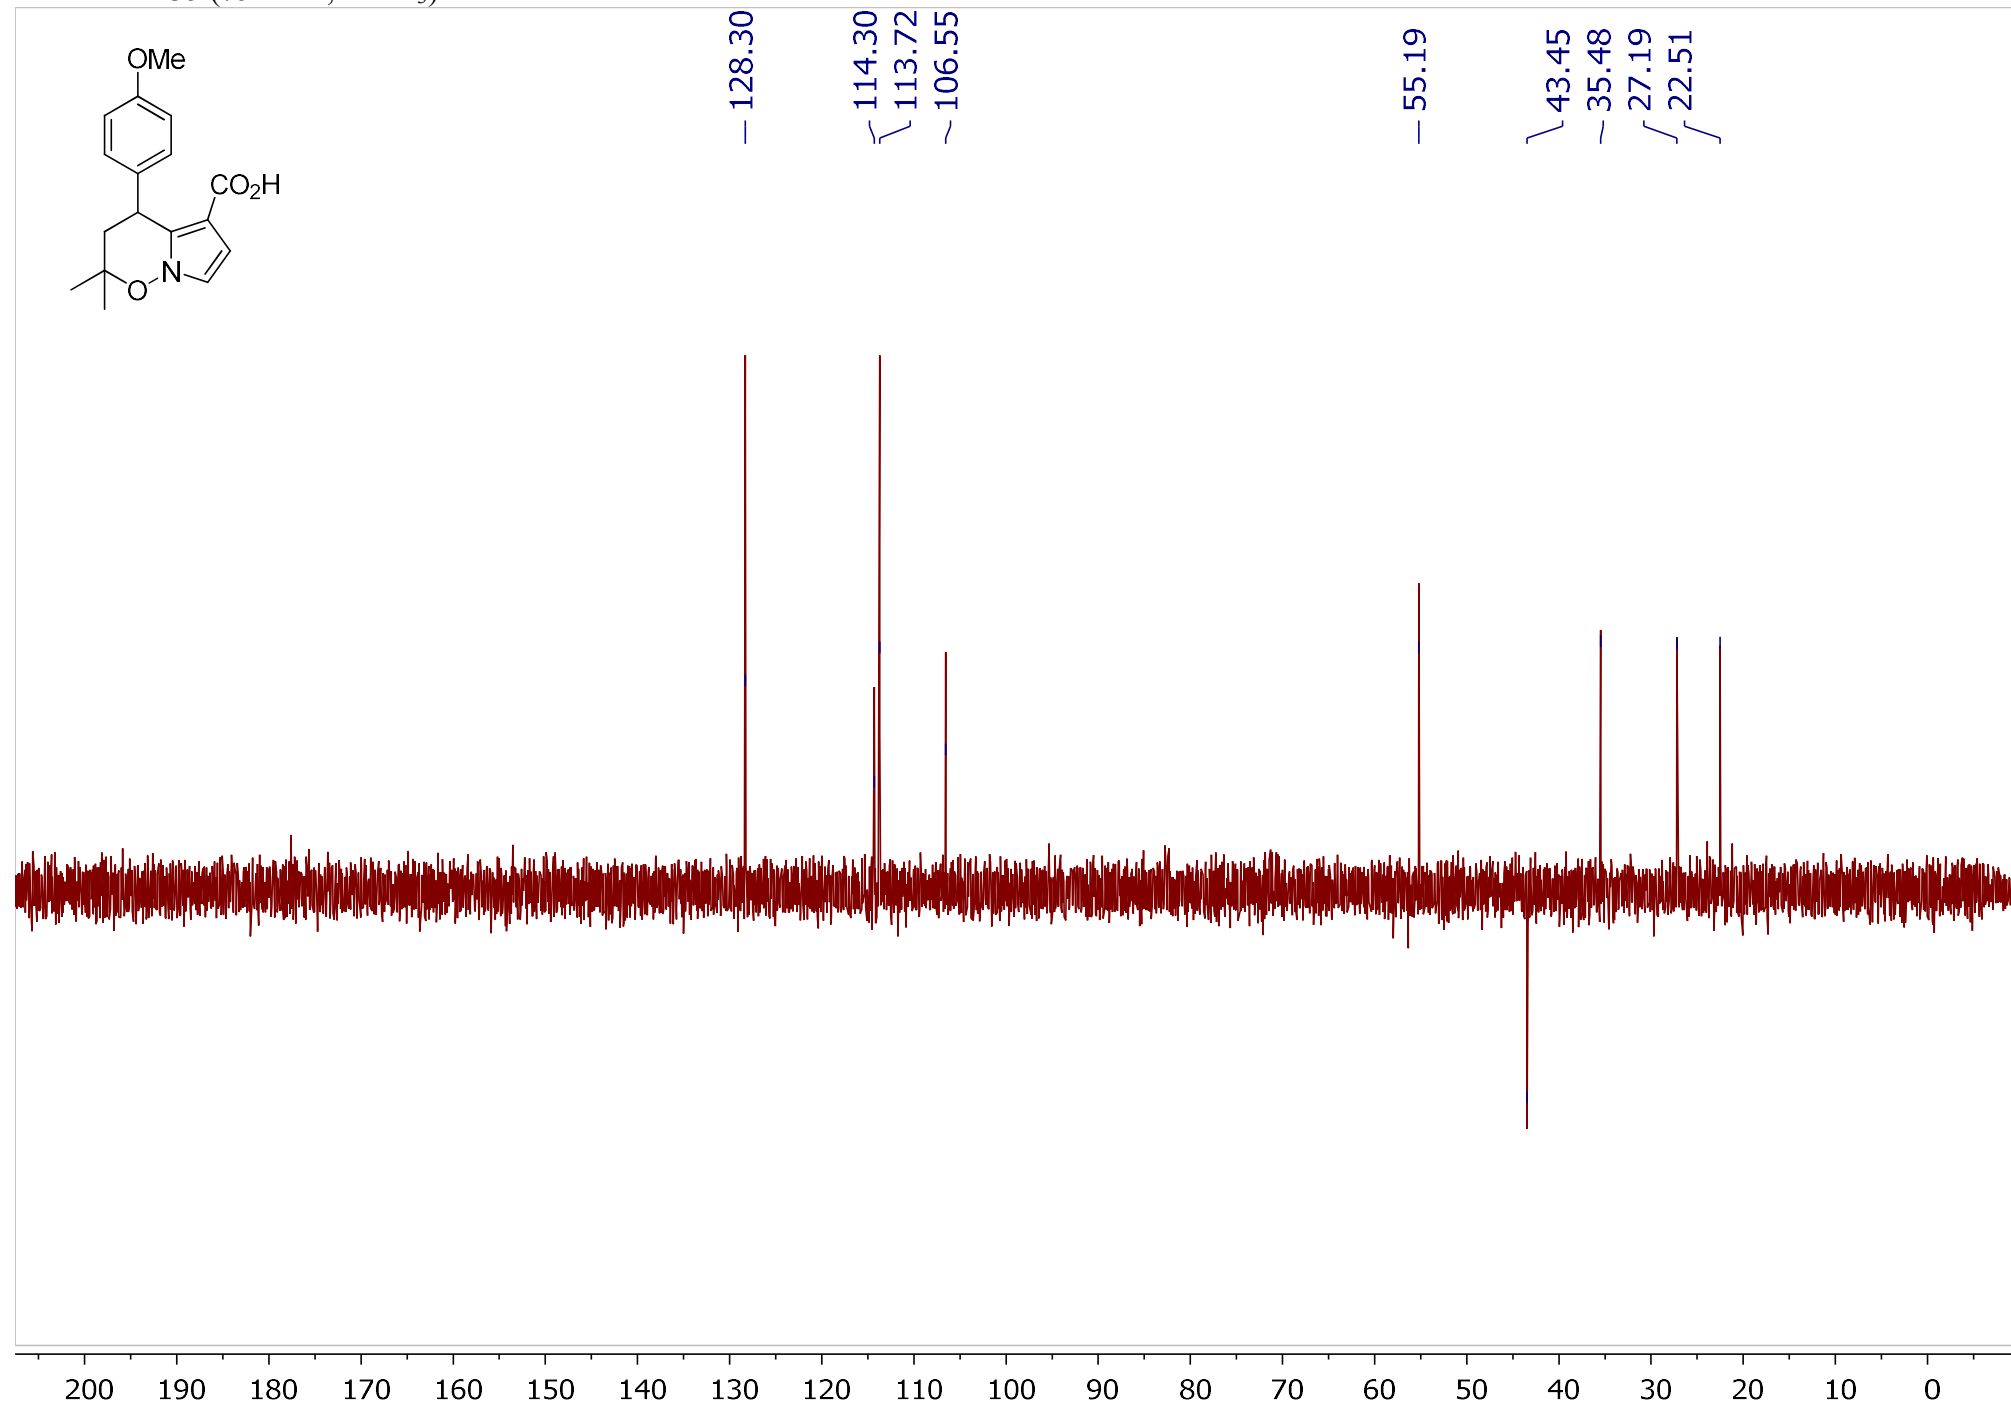

Supplement: s1 [file s1]
